# Supplementary material for: A chemically induced attenuated strain of Candida albicans generates robust protective immune responses and prevents systemic candidiasis development
Source: eLife journal article supplement (doi:10.7554/elife.93760), 2024-02-07
Supplement: fig1-data1 [file Figure A,B,C,E,F and G.xlsx]

## Sheet: Figure 1 A
	Absorbance @600nm
	Time in (Hours)	0	2	4	6	8	10	12	14	16	18	20	22	24
	Ca	0.5	0.69	0.893	1.098	1.22	1.7345	2.49	2.76	2.905	2.945	2.951	2.9303	2.9
		0.5	0.68	0.97	1.023	1.45	1.768	2.483	2.53	2.634	2.88	2.75	2.84	2.961
	Ca + 250μM EDTA	0.5	0.65	0.59	0.934	0.701	1.08	1.404	1.63	1.976	2.2	2.43	2.677	2.53
		0.5	0.82	0.933	0.739	1.101	1.102	1.19	1.823	2.1	2.64	2.58	2.51	2.69
	Ca + 8μM MgSO4	0.5	0.595	0.75	0.821	0.9	1.703	1.969	2.786	2.931	2.836	2.9	2.84	2.93
		0.5	0.467	0.64	0.762	0.808	1.656	1.799	2.733	2.674	2.825	2.89	2.759	2.74
	Ca + 8μM ZnCl2	0.5	0.515	0.71	0.811	0.91	1.713	1.869	2.086	2.131	2.436	2.67	2.94	2.93
		0.5	0.417	0.614	0.712	0.818	1.456	1.699	2.033	2.274	2.325	2.52	2.759	2.94
	Ca + 8μM FeCl2	0.5	0.525	0.72	0.821	0.98	1.793	1.899	2.096	2.341	2.536	2.69	2.94	2.91
		0.5	0.727	0.724	0.732	0.868	1.496	1.909	2.093	2.274	2.425	2.62	2.959	2.74
	Ca + 8μM MnCl2	0.5	0.581	0.72	0.83	0.89	1.693	1.938	2.723	2.76	2.823	2.88	2.72	2.63
		0.5	0.473	0.68	0.799	0.827	1.629	1.729	2.718	2.622	2.892	2.834	2.71	2.74
	Ca + 250μM EDTA+ 8μM MgSO4	0.5	0.535	0.73	0.831	0.8	1.503	1.909	2.786	2.931	2.936	2.8	2.89	2.923
		0.5	0.537	0.63	0.732	0.888	1.646	1.739	2.133	2.474	2.725	2.79	2.859	2.94
	Ca + 250μM EDTA+ 8μM ZnCl2	0.5	0.538	0.78	0.838	0.88	1.502	1.939	2.706	2.821	2.286	2.8	2.59	2.984
		0.5	0.538	0.68	0.738	0.85	1.846	1.769	2.333	2.774	2.825	2.87	2.959	2.81
	Ca + 250μM EDTA+ 8μM FeCl2	0.5	0.628	0.78	0.938	0.92	1.302	1.839	2.106	2.862	2.907	2.922	2.793	2.933
		0.5	0.738	0.98	1.009	0.855	1.646	2.003	2.133	2.594	2.555	2.97	2.959	2.916
	Ca + 250μM EDTA+ 8μM MnCl2	0.5	0.592	0.78	0.834	0.86	1.55	1.96	2.733	2.972	2.892	2.83	2.81	2.873
		0.5	0.545	0.67	0.762	0.828	1.632	1.809	2.228	2.481	2.895	2.89	2.86	2.84
	Ca + 250μM EDTA+ 8μM MgSO4@6Hrs	NA	NA	NA	0.933	1.247	1.411	1.644	1.83	2.34	2.533	2.792	2.99	2.91
		NA	NA	NA	1.092	1.398	1.545	1.611	1.851	2.479	2.714	2.954	2.963	2.971

## Sheet: Figure 1 B
	Number of colonies (108 cells/mL)
	Time in (Hours)	0	2	4	6	8	10	12	14	16	18	20	22	24
	Ca	0.5	1.6	7.5	16.6	23.3	29.9	31.2	32.4	35.5	35.6	35.2	34.5	35.2
		0.3	1	8.2	14.4	21.4	30.4	29	31.2	32.6	37.7	33.3	35.6	37.8
	Ca + 250μM EDTA	0.3	1.3	6.8	11.4	14.3	12	9.2	12.6	8.9	7.8	11.5	12.3	9.6
		0.1	1.7	8.3	11	14.5	14.7	11.5	13.4	11.6	9.2	10.1	8.7	6.1
	Ca + 8μM MgSO4	0.4	4.5	6.8	10	15.7	21.9	23.7	28.9	34.5	38.2	32.9	33.3	35.1
		0.8	2.8	6.2	12.7	19.3	24.5	26.3	31.7	32.3	33.8	35.7	34.5	34.8
	Ca + 8μM ZnCl2	0.2	4.4	5.7	10	12.6	21.5	24.6	24.5	24.4	26.7	25.9	26.6	29.1
		0.6	3.6	6.7	13.2	14.2	23.8	20.1	25.2	25.4	30	35.7	35	33.8
	Ca + 8μM FeCl2	0.3	4.5	5.5	8.9	15.3	2.9	20.9	24.5	31	32.3	33.7	36.1	32.2
		0.7	2.9	7.3	11.6	11.9	24.5	2	28.7	25.4	28.9	34.8	31.5	36.7
	Ca + 8μM MnCl2	0.3	4.3	6.7	9.8	16.2	21.9	24.3	29.4	34.5	34.2	33.9	34.3	35.2
		0.4	2.7	6.5	11.7	20.3	23.5	24.9	30	33.3	35.8	34.7	33.8	34.2
	Ca + 250μM EDTA+ 8μM MgSO4	0.5	3.8	5.3	7.5	11.1	14.3	20.4	23.9	27.8	29.6	35.5	33.3	34.6
		0.2	1.6	4.8	10.1	15.2	17.3	21.7	26.7	30.6	31.7	35.8	36.7	34.4
	Ca + 250μM EDTA+ 8μM ZnCl2	0.2	4	5.6	7.7	11.2	21.3	26.6	24.4	23.3	25.4	27.5	26.6	24.5
		0.1	2.5	6.1	10.1	14.5	23.4	23.3	25.7	22.1	30.2	34.1	36.2	38.1
	Ca + 250μM EDTA+ 8μM FeCl2	0.1	2.5	4.7	6.6	14.3	13.9	21.9	24.5	32	31.3	33.7	36.1	34.2
		0	3.4	7.9	9.3	15.8	15.5	23	21.7	23.4	28.9	34.8	30.5	36.7
	Ca + 250μM EDTA+ 8μM MnCl2	0.5	3.5	4.7	6.7	10.9	12.5	21.3	24.5	28.8	30.3	35.5	35.4	33.8
		0.3	2.2	3.9	8.9	15.4	16.3	22.9	26.7	31.6	32.7	34.3	36.8	34.9
	Ca + 250μM EDTA+ 8μM MgSO4@6Hrs	NA	NA	NA	11.1	13.9	16.1	18.9	18.5	18.2	15.2	14.8	16.7	18.1
		NA	NA	NA	10.7	17.1	16.2	18.6	18.5	18.9	16.6	15.4	15.5	16.2

## Sheet: Figure 1C
	Absorbance @570nm
	24 Hours	Ca	Ca + 250μM EDTA	Ca + 8μM MgSO4	Ca + 8μM ZnCl2	Ca + 8μM FeCl2	Ca + 8μM MnCl2	Ca + 250μM EDTA+ 8μM MgSO4	Ca + 250μM EDTA+ 8μM ZnCl2	Ca + 250μM EDTA+ 8μM FeCl2	Ca + 250μM EDTA+ 8μM MnCl2
	Set-1	2.72	1.057	2.699	1.92	2.555	2.255	2.315	1.918	2.5	2.087
	Set-2	2.707	1.221	2.733	2.305	2.314	2.219	2.109	2	1.996	1.906
	Set-3	2.609	1.023	2.731	2.286	2.222	2.52	2.511	2.322	2.088	2.231

## Sheet: Figure E
		Time in (Hours)	0	2	4	6	8	10	12	14	16	18	20	22	24
		Ca	0.5	0.638	0.916	1.062	1.301	1.55	2.222	2.745	2.876	2.96	2.936	2.955	2.962
			0.5	0.644	0.728	1.033	1.399	1.714	2.228	2.556	2.822	2.857	2.878	2.78	2.844
		Ca+250µM EDTA	0.5	0.637	0.562	0.977	1.008	1.22	1.452	1.623	1.821	2.042	2.403	2.445	2.467
			0.5	0.662	0.788	0.835	0.932	1.239	1.599	1.729	1.905	2.312	2.523	2.551	2.581
		Ca+250µM DTPA	0.5	0.613	0.615	0.713	0.971	1.034	1.304	1.487	1.604	1.938	2.276	2.383	2.417
			0.5	0.622	0.623	0.772	0.892	0.962	1.334	1.511	1.71	2.011	2.123	2.354	2.409
		Ca+250µM Aprotinin	0.5	0.544	0.596	0.644	0.883	1.044	1.291	1.619	1.996	2.367	2.588	2.601	2.622
			0.5	0.553	0.637	0.723	0.902	1.106	1.199	1.512	2.091	2.472	2.562	2.721	2.697
		Ca+100µM TPEN	0.5	0.562	0.584	0.594	0.691	0.756	1.039	1.204	1.199	1.188	1.193	1.071	1.195
			0.5	0.557	0.568	0.618	0.699	0.792	0.838	1.033	1.105	1.192	1.194	0.922	1.153
		Ca+100µM CE	0.5	0.513	0.57	0.632	0.644	0.662	0.682	0.777	0.689	0.693	0.723	0.654	0.842
			0.5	0.512	0.598	0.637	0.648	0.665	0.679	0.918	0.682	0.678	0.714	0.802	1.031

## Sheet: Figure F
	Time in (Hours)	0	2	4	6	8	10	12	14	16	18	20	22	24
	Ca	0	2	8	19	22	23	27	32	32	35	35	32	35
		0	3	5	17	23	27	27	29	31	33	35	33	34
	Ca+250µM EDTA	0	2	5	10	16	19	17	16	14	9	11	8	9
		0	2	4	9	16	17	15	14	14	12	9	8	6
	Ca+250µM DTPA	0	1	2	9	13	14	17	15	10	9	9	6	2
		0	1	1	9	13	14	18	16	11	1	9	4	3
	Ca+250µM Aprotinin	0	1	2	8	13	15	21	18	14	15	15	16	15
		0	2	3	8	15	16	20	19	18	17	19	18	12
	Ca+100µM TPEN	0	0	0	1	1	1	2	2	0	0	1	1	1
		0	0	0	1	1	1	1	1	1	1	0	1	0
	Ca+100µM CE	0	0	0	0	1	1	1	1	0	0	0	0	0
		0	0	0	1	1	0	1	0	0	0	0	0	0

## Sheet: Figure G
	24 Hours	Ca	Ca+250µM EDTA	Ca+250µM DTPA	Ca+250µM Aprotinin	Ca+100µM TPEN	Ca+100µM CE
	Set-1	2.583	0.811	0.848	1.327	1.108	0.772
	Set-2	2.907	1.052	1.039	1.356	1.103	0.67
	Set-3	2.661	1.093	1.055	1.212	1.109	0.758
	SD	0.138072	0.124403	0.0940366	0.0621843	0.00262467	0.0451467
