# Supplementary material for: A chemically induced attenuated strain of Candida albicans generates robust protective immune responses and prevents systemic candidiasis development
Source: eLife journal article supplement (doi:10.7554/elife.93760), 2024-02-07
Supplement: fig2-data1 [file Figure 2.xlsx]

## Sheet: Figure 2
Figure 2B
Name (Upregulated DEGs)	Chromosome	Region	Identifier	CAET vs. Wild Type - Max group means	CAET vs. Wild Type - Fold change	CAET vs. Wild Type - Log fold change	CAET vs. Wild Type - P-value	CAET vs. Wild Type - FDR p-value	CAET vs. Wild Type - Bonferroni	Feature ID	Database	Database identifier	Database symbol	Qualifier	GO biological process	GO cellular component	GO molecular function	Database object name	Synonym	Database object type	Taxon ID	Date	Assigned by	Annotation extension	Gene product form ID	MT523_rRNAfree_fwd (GE) - Total counts	MT523_rRNAfree_fwd (GE) - RPKM	MT523_rRNAfree_fwd (GE) - TPM	MT523_rRNAfree_fwd (GE) - CPM	MT524_rRNAfree_fwd (GE) - Total counts	MT524_rRNAfree_fwd (GE) - RPKM	MT524_rRNAfree_fwd (GE) - TPM	MT524_rRNAfree_fwd (GE) - CPM	MT525_rRNAfree_fwd (GE) - Total counts	MT525_rRNAfree_fwd (GE) - RPKM	MT525_rRNAfree_fwd (GE) - TPM	MT525_rRNAfree_fwd (GE) - CPM	MT526_rRNAfree_fwd (GE) - Total counts	MT526_rRNAfree_fwd (GE) - RPKM	MT526_rRNAfree_fwd (GE) - TPM	MT526_rRNAfree_fwd (GE) - CPM	MT527_rRNAfree_fwd (GE) - Total counts	MT527_rRNAfree_fwd (GE) - RPKM	MT527_rRNAfree_fwd (GE) - TPM	MT527_rRNAfree_fwd (GE) - CPM	MT528_rRNAfree_fwd (GE) - Total counts	MT528_rRNAfree_fwd (GE) - RPKM	MT528_rRNAfree_fwd (GE) - TPM	MT528_rRNAfree_fwd (GE) - CPM
CAALFM_CR08740WA	NC_032096.1	1881722..1882402	3642123	1.59778	64.8421	6.01886	0.0137288	0.0357518	1																	0	0	0	0	0	0	0	0	0	0	0	0	3	0.57464	0.881474	0.591209	16	2.89876	4.59368	2.53414	7	1.31995	2.15317	1.12912
SCW4	NC_032089.1	530172..531908	3636797	1.03407	28.9947	4.85772	0.000185545	0.000794714	1	SCW4	CGD	CAL0130484, CAL0000198806	SCW4	acts_upstream_of_or_within	0000747 // conjugation with cellular fusion (CGD_REF:CAL0121033 [IEA] SGD:S000003511) /// 0008643 // carbohydrate transport (CGD_REF:CAL0000228661|PMID:33472984 [RCA]) /// 0071555 // cell wall organization (PMID:21873635 [IBA] PANTHER:PTN001047358|SGD:S000003514|CGD:CAL0000186956) /// 0005975 // carbohydrate metabolic process (CGD_REF:CAL0142013 [IEA] InterPro:IPR013781|InterPro:IPR000490)	0009986 // cell surface (PMID:21873635 [IBA] PANTHER:PTN001047358|CGD:CAL0000177294|CGD:CAL0000186956|UniProtKB:A0A1D8PNW1) /// 0009277 // fungal-type cell wall (CGD_REF:CAL0000142548|PMID:21769633 [IDA]) /// 0009277 // fungal-type cell wall (CGD_REF:CAL0121033 [IEA] SGD:S000003511) /// 0062040 /// 0005576 // extracellular region (CGD_REF:CAL0000228425|PMID:31621333 [IDA]) /// 0009277 // fungal-t…	0042973 // glucan endo-1,3-beta-D-glucosidase activity (PMID:21873635 [IBA] PANTHER:PTN001047358|SGD:S000003514|UniProtKB:Q5B430) /// 0042124 // 1,3-beta-glucanosyltransferase activity (PMID:21873635 [IBA] PANTHER:PTN001047358|CGD:CAL0000186956) /// 0004553 // hydrolase activity, hydrolyzing O-glycosyl compounds (CGD_REF:CAL0142013 [IEA] InterPro:IPR000490) /// 0003824 // catalytic activity (CGD_…		C1_02520W_A|orf19.10458|IPF24282.1|IPF8122.1|Contig4-2841_0015|orf6.4005|CA2202|CMP66|CaO19.10458|CaO19.2941|orf19.2941|C1_02520W_B|C1_02520W|CAWG_01129	gene_product	taxon:237561	20210223	CGD			0	0	0	0	1	0.0776254	0.111433	0.182567	0	0	0	0	15	1.12645	1.72793	2.95604	7	0.497208	0.787928	1.10869	20	1.47855	2.41189	3.22607
CAALFM_C110050WA	NC_032089.1	2202127..2202978	3634811	2.28351	18.132	4.18047	2.42263e-05	0.000124176	0.147732																	0	0	0	0	2	0.316515	0.454366	0.365134	0	0	0	0	10	1.53102	2.34853	1.9707	18	2.60659	4.13068	2.85091	18	2.71293	4.42549	2.90346
HAP3	NC_032092.1	287625..288733	3635629	7.18019	18.4511	4.20564	3.92519e-14	5.412e-13	2.39358e-10	HAP3	CGD	CAL0000192077, A0A1D8PLA9	HAP3	acts_upstream_of_or_within	0006357 // regulation of transcription from RNA polymerase II promoter (PMID:21873635 [IBA] PANTHER:PTN000115646|SGD:S000000117|PomBase:SPAC23C11.08|CGD:CAL0000175007|UniProtKB:P25208|UniProtKB:A0A1D8PLA9) /// 0043619 // regulation of transcription from RNA polymerase II promoter in response to oxidative stress (CGD_REF:CAL0000214963|PMID:28122000 [IMP])	0016602 // CCAAT-binding factor complex (PMID:21873635 [IBA] PANTHER:PTN000115646|UniProtKB:P25208|RGD:3172|FB:FBgn0032816|SGD:S000000117) /// 0005575 // cellular_component (CGD_REF:CAL0125086 [ND])	0000981 // RNA polymerase II transcription factor activity, sequence-specific DNA binding (PMID:21873635 [IBA] PANTHER:PTN000115646|UniProtKB:P25208|SGD:S000000117) /// 0000978 // RNA polymerase II core promoter proximal region sequence-specific DNA binding (PMID:21873635 [IBA] PANTHER:PTN000115646|UniProtKB:P25208|SGD:S000000117) /// 0003700 // transcription factor activity, sequence-specific DN…		C4_01390W_A|orf19.12116|orf6.3344|IPF22615.1|IPF9315.2|HAP32|Contig4-1826_0002|CA1717|CaO19.4647|CaO19.12116|IPF9315|orf19.4647|C4_01390W_B|C4_01390W|CAWG_03645	gene_product	taxon:237561	20170213	CGD			2	0.271468	0.391666	0.376586	2	0.272394	0.39103	0.365134	4	0.570146	0.822777	0.728075	34	4.47987	6.87193	6.70037	63	7.85137	12.4421	9.9782	71	9.20934	15.0228	11.4525
CAALFM_CR02340WA	NC_032096.1	518245..519572	3644936	2.66139	53.5609	5.74311	5.81974e-06	3.38443e-05	0.0354888																	0	0	0	0	0	0	0	0	1	0.11226	0.162003	0.182019	16	1.66037	2.54695	3.15311	28	2.74829	4.35523	4.43475	35	3.57551	5.83258	5.64562
CSA2	NC_032092.1	complement(1539950..1540393)	3642930	3.74112	26.6647	4.73686	0.00020927	0.000886698	1	CSA2	CGD	CAL0000201350	CSA2	acts_upstream_of_or_within	0044011 // single-species biofilm formation on inanimate substrate (CGD_REF:CAL0000158903|PMID:23563485 [IMP]) /// 0035351 // heme transmembrane transport (CGD_REF:CAL0000214832|PMID:27617569 [IDA]) /// 0006879 // cellular iron ion homeostasis (CGD_REF:CAL0000173858|PMID:24796871 [IMP]) /// 0055085 // transmembrane transport (CGD_REF:CAL0000228661|PMID:33472984 [RCA]) /// 0006879 // cellular iron…	0009277 // fungal-type cell wall (PMID:21873635 [IBA] PANTHER:PTN002441280|UniProtKB:Q59UP6|CGD:CAL0000195131|CGD:CAL0000201940) /// 0005576 // extracellular region (CGD_REF:CAL0125975|PMID:20641015 [IDA]) /// 0005576 // extracellular region (CGD_REF:CAL0000214832|PMID:27617569 [IDA]) /// 0005576 // extracellular region (PMID:21873635 [IBA] PANTHER:PTN002441280|CGD:CAL0000201350|CGD:CAL0000195131)	0020037 // heme binding (CGD_REF:CAL0000214832|PMID:27617569 [IDA]) /// 0020037 // heme binding (PMID:21873635 [IBA] PANTHER:PTN002441280|CGD:CAL0000201940|CGD:CAL0000195131|CGD:CAL0000201350|CGD:CAL0000201827|UniProtKB:Q59UP6)		C4_06920C_A|orf19.10631|IPF24214.1|IPF12297.1|Contig4-2438_0005|Contig4-2438_0006|Contig4-2438_0007|orf6.6928|orf6.6926|CA4394|orf19.3119|CaO19.10629|CRW1|CaO19.3117|IPF12297|orf19.3117|C4_06920C_B|C4_06920C|CAWG_03137	gene_product	taxon:237561	20181022	CGD			0	0	0	0	0	0	0	0	1	0.317818	0.458643	0.182019	15	4.40686	6.75995	2.95604	11	3.05668	4.84393	1.74222	13	3.75981	6.13322	2.09694
PGA31	NC_032092.1	complement(874032..875090)	3641226	9.90951	22.0969	4.46577	5.91324e-20	1.25365e-18	3.6059e-16	PGA31	CGD	CAL0000183944	PGA31	located_in	0031505 // fungal-type cell wall organization (CGD_REF:CAL0119430|PMID:18765290 [IMP])	0009986 // cell surface (CGD_REF:CAL0080724|PMID:12845604 [ISS]) /// 0030445 // yeast-form cell wall (CGD_REF:CAL0119415|PMID:18712765 [IDA]) /// 0009986 // cell surface (CGD_REF:CAL0119415|PMID:18712765 [IDA])	0003674 // molecular_function (CGD_REF:CAL0125086 [ND])		C4_04080C_A|orf19.12761|IPF21866.1|IPF8535.2|Contig4-2961_0018|orf6.3932|orf6.8290|CA2156|CaO19.5302|LDG5|IPF8535|orf19.5302|C4_04080C_B|C4_04080C|CAWG_03397	gene_product	taxon:237561	20140625	CGD			1	0.12689	0.183073	0.188293	4	0.509293	0.731105	0.730268	5	0.666248	0.961461	0.910094	75	9.23819	14.171	14.7802	77	8.97087	14.2162	12.1956	95	11.5195	18.7913	15.3238
CAALFM_CR07740WA	NC_032096.1	1679654..1679848	30515430	43.0912	42.2094	5.39949	1.22968e-13	1.62356e-12	7.49858e-10																	0	0	0	0	1	0.691463	0.992615	0.182567	3	2.17094	3.13288	0.546057	69	46.1568	70.8027	13.5978	71	44.9225	71.1889	11.2453	58	38.1943	62.3048	9.35559
CAALFM_C602100WA	NC_032094.1	434385..434888	3647554	3.9792	32.1762	5.00792	9.58334e-05	0.000435707	0.584392																	1	0.266621	0.384672	0.188293	0	0	0	0	0	0	0	0	18	4.65869	7.14623	3.54725	11	2.69279	4.26727	1.74222	18	4.58614	7.48118	2.90346
CAALFM_C104010CA	NC_032089.1	complement(842768..843802)	3646426	115.337	21.988	4.45864	1.54908e-126	4.82253e-124	9.44629e-123																	32	4.15464	5.99419	6.02538	46	5.99268	8.60266	8.39808	41	5.58991	8.06679	7.46277	914	115.193	176.702	180.122	1036	123.498	195.708	164.086	865	107.32	175.067	139.527
CSR1	NC_032092.1	complement(1042165..1044021)	3641162	151.788	23.2254	4.53763	1.40154e-225	2.07253e-222	8.5466e-222	CSR1	CGD	CAL0000185267, A0A1D8PM73, CAL0000165333	CSR1	acts_upstream_of_or_within	0036170 // filamentous growth of a population of unicellular organisms in response to starvation (CGD_REF:CAL0087974|PMID:12773383 [IMP]) /// 0071216 // cellular response to biotic stimulus (CGD_REF:CAL0087974|PMID:12773383 [IMP]) /// 0006882 // cellular zinc ion homeostasis (CGD_REF:CAL0118912|PMID:18309267 [IMP]) /// 0036180 // filamentous growth of a population of unicellular organisms in resp…	0005634 // nucleus (CGD_REF:CAL0121033 [IEA] SGD:S000003592) /// 0005634 // nucleus (PMID:21873635 [IBA] PANTHER:PTN001803442|WB:WBGene00006604|UniProtKB:A0A2R8QHY4|FB:FBgn0039039|SGD:S000004121|MGI:MGI:1932535|MGI:MGI:1929518|UniProtKB:Q59RR0|UniProtKB:O60481|SGD:S000002553|MGI:MGI:107201|UniProtKB:Q15915|SGD:S000003592|dictyBase:DDB_G0291342|UniProtKB:O95409|MGI:MGI:106683|FB:FBgn0003002|MGI:MG…	0000977 // RNA polymerase II regulatory region sequence-specific DNA binding (CGD_REF:CAL0121033 [IEA] SGD:S000003592) /// 0003677 // DNA binding (CGD_REF:CAL0081001|PMID:10705369 [ISS]) /// 0000981 // RNA polymerase II transcription factor activity, sequence-specific DNA binding (PMID:21873635 [IBA] PANTHER:PTN001803442|UniProtKB:Q14872|SGD:S000003592|SGD:S000002553|UniProtKB:O60481|PomBase:SPAC…		C4_04850C_A|orf19.11274|SUR1|ZAP1|IPF23443.1|IPF6909.2|Contig4-2569_0008|orf6.3067|CA1524|CaO19.3794|CaO19.11274|orf19.3794|C4_04850C_B|C4_04850C|CAWG_03331	gene_product	taxon:237561	20210223	CGD			71	5.13772	7.41254	13.3688	98	7.1157	10.2148	17.8916	95	7.21894	10.4176	17.2918	1809	127.071	194.922	356.499	2334	155.07	245.741	369.668	2505	173.221	282.569	404.065
CFL5	NC_032093.1	308742..310874	3642612	7.68298	151.129	7.23964	2.98284e-14	4.16014e-13	1.81893e-10	CFL5	CGD	A0A1D8PN52, CAL0000201731, CAL0000145875	CFL5	acts_upstream_of_or_within	0015677 // copper ion import (PMID:21873635 [IBA] PANTHER:PTN001284949|SGD:S000001703|SGD:S000003974|SGD:S000004204|CGD:CAL0000193490) /// 0006879 // cellular iron ion homeostasis (PMID:21873635 [IBA] PANTHER:PTN001284949|SGD:S000003974|SGD:S000005908) /// 0008643 // carbohydrate transport (CGD_REF:CAL0000228661|PMID:33472984 [RCA]) /// 0006826 // iron ion transport (PMID:21873635 [IBA] PANTHER:P…	0005886 // plasma membrane (PMID:21873635 [IBA] PANTHER:PTN001284949|SGD:S000004204|SGD:S000005908|CGD:CAL0000177334|CGD:CAL0000193490|SGD:S000001703|SGD:S000005343) /// 0005886 // plasma membrane (CGD_REF:CAL0121033 [IEA] SGD:S000005908)	0000293 // ferric-chelate reductase activity (CGD_REF:CAL0121033 [IEA] SGD:S000005908) /// 0000293 // ferric-chelate reductase activity (PMID:21873635 [IBA] PANTHER:PTN001284949|CGD:CAL0000193490|SGD:S000005908|SGD:S000004204|SGD:S000003974|CGD:CAL0000177334|SGD:S000005343|UniProtKB:A0A1D8PKY2|SGD:S000001703)		C5_01380W_A|orf19.9486|orf6.5607|orf6.1281|FRE31|IPF25358.1|IPF15107.3|FRE4|CFL90|Contig4-2699_0003|Contig4-2699_0004|CA0397|CaO19.1930|IPF15107.2|orf19.1930|C5_01380W_B|C5_01380W|CAWG_04525	gene_product	taxon:237561	20210223	CGD			0	0	0	0	1	0.0632139	0.0907454	0.182567	1	0.0661562	0.0954699	0.182019	116	7.09396	10.8818	22.8601	127	7.34603	11.6413	20.1148	143	8.60896	14.0434	23.0664
IFD6	NC_032089.1	867380..868414	3644703	314.798	18.4736	4.2074	3.0241e-184	2.23594e-181	1.8441e-180	IFD6	CGD	CAL0000201829	IFD6	acts_upstream_of_or_within	0044011 // single-species biofilm formation on inanimate substrate (CGD_REF:CAL0123764|PMID:19529758 [IMP])	0005575 // cellular_component (CGD_REF:CAL0125086 [ND])	0047834 // D-threo-aldose 1-dehydrogenase activity (CGD_REF:CAL0142013 [IEA] InterPro:IPR023210) /// 0016491 // oxidoreductase activity (CGD_REF:CAL0082065|PMID:15215138 [TAS]) /// 0018456 // aryl-alcohol dehydrogenase (NAD+) activity (CGD_REF:CAL0082081|PMID:15273122 [NAS])		C1_04140W_A|orf19.8650|Contig4-2647_0009|YPX98|YPL88|IFD1|IPF18856.2|IPF17049.2|Contig4-2647_0010|orf6.2004|orf6.2130|CA0924|CaO19.1048|LPG20|IFD5|orf19.1048|C1_04140W_B|C1_04140W|CAWG_00979	gene_product	taxon:237561	20140625	CGD			156	20.2539	29.2217	29.3737	124	16.1542	23.1898	22.6383	105	14.3156	20.6589	19.112	2270	286.093	438.855	447.348	2758	328.771	521.005	436.823	2656	329.529	537.546	428.422
ZRT1	NC_032092.1	complement(1545215..1546621)	3642970	974.6	5644.99	12.4628	3.87557e-84	5.20999e-82	2.36332e-80	ZRT1	UniProtKB	A0A1D8PMR6	ZRT1	involved_in	0071577 // zinc II ion transmembrane transport (PMID:21873635 [IBA] PANTHER:PTN000115815|TAIR:locus:2087705|UniProtKB:Q9NY26|SGD:S000003224|UniProtKB:A0A1D8PGN5|FB:FBgn0033097|TAIR:locus:2123787|FB:FBgn0033096|PomBase:SPBC16D10.06|TAIR:locus:2062576|TAIR:locus:2174098|SGD:S000004120)	0005886 // plasma membrane (PMID:21873635 [IBA] PANTHER:PTN000867664|UniProtKB:Q6L8G0|UniProtKB:A3BI11|SGD:S000003224|UniProtKB:Q6L8G1|PomBase:SPBC16D10.06|UniProtKB:Q75HB1|TAIR:locus:2206011|TAIR:locus:2133965|SGD:S000004120|UniProtKB:Q6ZJ91) /// 0016020 // membrane (PMID:21873635 [IBA] PANTHER:PTN000115815|FB:FBgn0033097|PomBase:SPCC126.09|FB:FBgn0038412|SGD:S000003224|UniProtKB:A3BI11|ZFIN:ZDB…	0005385 // zinc ion transmembrane transporter activity (PMID:21873635 [IBA] PANTHER:PTN000115815|SGD:S000001658|TAIR:locus:2206011|TAIR:locus:2062576|PomBase:SPBC16D10.06|FB:FBgn0033096|MGI:MGI:1353474|SGD:S000004120|MGI:MGI:2684326|SGD:S000003224|UniProtKB:O04089|TAIR:locus:2087705|FB:FBgn0033097|MGI:MGI:2147269|MGI:MGI:1917056|UniProtKB:Q9NP94)	Zrt1p	UniProtKB:A0A1D8PMR6|PTN002593202	protein	taxon:237561	20200929	GO_Central			3	0.286518	0.413379	0.564879	2	0.191664	0.275139	0.365134	0	0	0	0	11499	1066.07	1635.31	2266.1	10461	917.316	1453.68	1656.86	10304	940.41	1534.05	1662.07
CAALFM_C604230WA	NC_032094.1	933892..935499	3646274	13.2664	19.1498	4.25926	3.34186e-36	1.67518e-34	2.03786e-32																	7	0.584974	0.843981	1.31805	10	0.838528	1.20373	1.82567	7	0.61429	0.886481	1.27413	135	10.9514	16.799	26.6044	198	15.1921	24.0751	31.36	171	13.6557	22.2761	27.5829
PHO87	NC_032089.1	1244647..1247667	3639861	68.986	90.3067	6.49676	1.63621e-179	1.07535e-176	9.9776e-176	PHO87	CGD	CAL0000193556, CAL0131416, A0A1D8PDP9	PHO87	acts_upstream_of_or_within	0006817 // phosphate ion transport (PMID:21873635 [IBA] PANTHER:PTN000815044|SGD:S000003734|SGD:S000005296|SGD:S000000633) /// 0097080 // plasma membrane selenite transport (CGD_REF:CAL0121033 [IEA] SGD:S000000633) /// 2000185 // regulation of phosphate transmembrane transport (CGD_REF:CAL0121033 [IEA] SGD:S000003734) /// 0006814 // sodium ion transport (CGD_REF:CAL0142013 [IEA] InterPro:IPR00189…	0016021 // integral component of membrane (PMID:21873635 [IBA] PANTHER:PTN000031793|RGD:628786|FB:FBgn0036816) /// 0005886 // plasma membrane (CGD_REF:CAL0121033 [IEA] SGD:S000000633) /// 0005886 // plasma membrane (CGD_REF:CAL0121033 [IEA] SGD:S000003734)	0005315 // inorganic phosphate transmembrane transporter activity (PMID:21873635 [IBA] PANTHER:PTN000815044|SGD:S000000633|SGD:S000003734|SGD:S000005296) /// 0005315 // inorganic phosphate transmembrane transporter activity (CGD_REF:CAL0121033 [IEA] SGD:S000000633) /// 0005315 // inorganic phosphate transmembrane transporter activity (CGD_REF:CAL0121033 [IEA] SGD:S000003734)		C1_05940W_A|orf19.9990|orf6.1540|PHO98|IPF19824.2|IPF14853.2|Contig4-2200_0003|Contig4-2200_0004|Contig4-2200_0005|orf6.104|orf6.293|CA0548|CaO19.2454|CA0015|PHO87.5eoc|IPF19824.1|orf19.2454|C1_05940W_B|C1_05940W|CAWG_00813	gene_product	taxon:237561	20210202	CGD			16	0.711694	1.02681	3.01269	22	0.981919	1.40957	4.01647	12	0.560521	0.808887	2.18423	1410	60.8821	93.3907	277.868	1695	69.2244	109.7	268.461	1808	76.8516	125.365	291.636
PRA1	NC_032092.1	1547130..1548029	3642969	3058.07	1829.35	10.8371	4.67719e-286	1.38328e-282	2.85215e-282	PRA1	CGD	CAL0000174610, CAL0000164356	PRA1	acts_upstream_of_or_within	0044406 // adhesion of symbiont to host (CGD_REF:CAL0117291|PMID:17277107 [IMP]) /// 0034727 // piecemeal microautophagy of nucleus (CGD_REF:CAL0000228661|PMID:33472984 [RCA]) /// 0007159 // leukocyte cell-cell adhesion (CGD_REF:CAL0117291|PMID:17277107 [IDA]) /// 0006508 // proteolysis (CGD_REF:CAL0000228661|PMID:33472984 [RCA]) /// 0052155 // modulation by symbiont of host cell-mediated immune …	0009986 // cell surface (CGD_REF:CAL0119341|PMID:18625733 [IDA]) /// 0030446 // hyphal cell wall (CGD_REF:CAL0081549|PMID:1398933 [IDA]) /// 0005576 // extracellular region (PMID:21873635 [IBA] PANTHER:PTN002217690|CGD:CAL0000174610) /// 0009986 // cell surface (CGD_REF:CAL0100135|PMID:8300229 [IDA]) /// 0005576 // extracellular region (CGD_REF:CAL0124474|PMID:19850343 [IDA]) /// 0009277 // funga…	0070051 // fibrinogen binding (CGD_REF:CAL0081553|PMID:10943362 [IDA]) /// 0008237 // metallopeptidase activity (CGD_REF:CAL0142013 [IEA] InterPro:IPR024079) /// 0005178 // integrin binding (PMID:21873635 [IBA] PANTHER:PTN002217690|CGD:CAL0000174610) /// 0008270 // zinc ion binding (PMID:21873635 [IBA] PANTHER:PTN002217690|CGD:CAL0000174610) /// 0008270 // zinc ion binding (CGD_REF:CAL0000215337|…		C4_06980W_A|orf19.10623|orf6.6934|FBP1|mp58|IPF8782.2|IPF14364.1|Contig4-2739_0001|orf6.60|CA4399|CaO19.3111|orf19.3111|C4_06980W_B|C4_06980W|CAWG_03130	gene_product	taxon:237561	20170621	CGD			11	1.64238	2.36958	2.07122	15	2.24725	3.226	2.7385	7	1.09753	1.58385	1.27413	24246	3514.14	5390.55	4778.15	21104	2893.09	4584.7	3342.54	19393	2766.99	4513.68	3128.16
CAALFM_C200860CA	NC_032090.1	complement(146138..147394)	3638805	667.91	1600.23	10.6441	1.56137e-123	4.4708e-121	9.52123e-120																	4	0.427611	0.616944	0.753172	2	0.214535	0.307971	0.365134	5	0.561302	0.810013	0.910094	4896	508.075	779.366	964.853	7279	714.458	1132.2	1152.88	7647	781.198	1274.34	1233.49
CHT4	NC_032090.1	complement(388066..389232)	3635768	111.937	20.7121	4.3724	1.39761e-128	4.5927e-126	8.52263e-125	CHT4	CGD	CAL0000185677	CHT4	acts_upstream_of_or_within	0034727 // piecemeal microautophagy of nucleus (CGD_REF:CAL0000228661|PMID:33472984 [RCA]) /// 0030435 // sporulation resulting in formation of a cellular spore (CGD_REF:CAL0121033 [IEA] SGD:S000002779) /// 0005975 // carbohydrate metabolic process (CGD_REF:CAL0142013 [IEA] InterPro:IPR013781|InterPro:IPR001223) /// 0043161 // proteasome-mediated ubiquitin-dependent protein catabolic process (CGD…	0005575 // cellular_component (CGD_REF:CAL0125086 [ND])	0004568 // chitinase activity (CGD_REF:CAL0142013 [IEA] InterPro:IPR011583) /// 0004553 // hydrolase activity, hydrolyzing O-glycosyl compounds (CGD_REF:CAL0142013 [IEA] InterPro:IPR001223) /// 0003824 // catalytic activity (CGD_REF:CAL0142013 [IEA] InterPro:IPR013781) /// 0008061 // chitin binding (CGD_REF:CAL0142013 [IEA] InterPro:IPR011583)		C2_02010C_A|orf19.9090|IPF25787.1|IPF8245.2|Contig4-1806_0001|orf6.3398|orf6.3966|CA1753|CaO19.1515|IPF8245|orf19.1515|C2_02010C_B|C2_02010C|CAWG_03969	gene_product	taxon:237561	20210223	CGD			42	4.83618	6.97749	7.90831	43	4.96822	7.13203	7.85038	53	6.40865	9.24831	9.647	989	110.547	169.575	194.902	990	104.666	165.864	156.8	1096	120.599	196.729	176.788
CFL2	NC_032092.1	complement(1276925..1279141)	3641811	216.234	94.2481	6.55839	8.05852e-286	1.58887e-282	4.91408e-282	CFL2	CGD	A0A1D8PME3, CAL0000191531	CFL2	acts_upstream_of_or_within	0015677 // copper ion import (PMID:21873635 [IBA] PANTHER:PTN001284949|SGD:S000001703|SGD:S000003974|SGD:S000004204|CGD:CAL0000193490) /// 0006879 // cellular iron ion homeostasis (PMID:21873635 [IBA] PANTHER:PTN001284949|SGD:S000003974|SGD:S000005908) /// 0006826 // iron ion transport (PMID:21873635 [IBA] PANTHER:PTN001284949|SGD:S000005343|UniProtKB:A0A1D8PKY2|SGD:S000001703|CGD:CAL0000193490|C…	0005886 // plasma membrane (PMID:21873635 [IBA] PANTHER:PTN001284949|SGD:S000004204|SGD:S000005908|CGD:CAL0000177334|CGD:CAL0000193490|SGD:S000001703|SGD:S000005343) /// 0005575 // cellular_component (CGD_REF:CAL0125086 [ND])	0016491 // oxidoreductase activity (CGD_REF:CAL0142013 [IEA] InterPro:IPR013121|InterPro:IPR013112) /// 0000293 // ferric-chelate reductase activity (PMID:21873635 [IBA] PANTHER:PTN001284949|CGD:CAL0000193490|SGD:S000005908|SGD:S000004204|SGD:S000003974|CGD:CAL0000177334|SGD:S000005343|UniProtKB:A0A1D8PKY2|SGD:S000001703)		C4_05780C_A|orf19.8849|orf6.5731|FRE2|IPF26059.1|IPF8512.2|CFL97|Contig4-2968_0010|Contig4-2968_0011|CA3461|CaO19.8849|CaO19.1264|orf19.1264|C4_05780C_B|C4_05780C|CAWG_03245	gene_product	taxon:237561	20210226	CGD			34	2.06081	2.97327	6.40196	35	2.12866	3.05575	6.38984	42	2.67328	3.85781	7.64479	3468	204.049	313.003	683.438	3933	218.876	346.854	622.925	3898	225.778	368.302	628.76
CSA1	NC_032095.1	complement(10024..13080)	3638009	801.285	22.5038	4.4921	6.9963e-169	3.44859e-166	4.26634e-165	CSA1	CGD	CAL0000201940, CAL0000148327	CSA1	acts_upstream_of_or_within	0044011 // single-species biofilm formation on inanimate substrate (CGD_REF:CAL0000158903|PMID:23563485 [IMP]) /// 0008643 // carbohydrate transport (CGD_REF:CAL0000228661|PMID:33472984 [RCA]) /// 0044011 // single-species biofilm formation on inanimate substrate (CGD_REF:CAL0116848|PMID:17042757 [IMP]) /// 0006879 // cellular iron ion homeostasis (CGD_REF:CAL0082082|PMID:15306022 [IMP]) /// 0008…	0046658 // anchored component of plasma membrane (CGD_REF:CAL0081083|PMID:10652105 [IMP]) /// 0009986 // cell surface (CGD_REF:CAL0080724|PMID:12845604 [ISS]) /// 0009986 // cell surface (CGD_REF:CAL0081083|PMID:10652105 [IDA]) /// 0005933 // cellular bud (CGD_REF:CAL0081083|PMID:10652105 [IDA]) /// 0046658 // anchored component of plasma membrane (CGD_REF:CAL0081083|PMID:10652105 [ISS]) /// 0009…	0020037 // heme binding (CGD_REF:CAL0082082|PMID:15306022 [IGI]) /// 0003674 // molecular_function (CGD_REF:CAL0125086 [ND]) /// 0020037 // heme binding (PMID:21873635 [IBA] PANTHER:PTN002441280|CGD:CAL0000201940|CGD:CAL0000195131|CGD:CAL0000201350|CGD:CAL0000201827|UniProtKB:Q59UP6)		C7_00090C_A|orf6.8439|WAP1|IPF5641.1|Contig4-2995_0015|CA5585|CaJ7.0015|CaO19_7114|CaJ7_0015|CaO19.7114|orf19.7114|C7_00090C_B|C7_00090C|CAWG_05366	gene_product	taxon:237561	20210223	CGD			811	35.6492	51.4335	152.706	832	36.6971	52.6797	151.896	770	35.5432	51.2924	140.155	21656	924.069	1417.48	4267.74	17729	715.532	1133.91	2807.99	18194	764.255	1246.7	2934.75
ZRT2	NC_032090.1	524004..525116	3635861	2333.49	68.172	6.09111	4.37127e-301	2.58561e-297	2.6656e-297	ZRT2	CGD	CAL0000174214, CAL0000159002, A0A1D8PGN5	ZRT2	acts_upstream_of_or_within	0071578 // zinc II ion transmembrane import (PMID:21873635 [IBA] PANTHER:PTN000113529|UniProtKB:A0A1D8PGN5|SGD:S000004120) /// 0071578 // zinc II ion transmembrane import (CGD_REF:CAL0121033 [IEA] PomBase:SPBC16D10.06|SGD:S000004120) /// 0071578 // zinc II ion transmembrane import (CGD_REF:CAL0000215431|PMID:29727465 [IMP]) /// 0071577 // zinc II ion transmembrane transport (PMID:21873635 [IBA] P…	0005886 // plasma membrane (CGD_REF:CAL0121033 [IEA] SGD:S000004120) /// 0005886 // plasma membrane (PMID:21873635 [IBA] PANTHER:PTN000867664|UniProtKB:Q6L8G0|UniProtKB:A3BI11|SGD:S000003224|UniProtKB:Q6L8G1|PomBase:SPBC16D10.06|UniProtKB:Q75HB1|TAIR:locus:2206011|TAIR:locus:2133965|SGD:S000004120|UniProtKB:Q6ZJ91) /// 0016020 // membrane (PMID:21873635 [IBA] PANTHER:PTN000115815|FB:FBgn0033097|P…	0000007 // low-affinity zinc ion transmembrane transporter activity (CGD_REF:CAL0121033 [IEA] SGD:S000004120) /// 0005385 // zinc ion transmembrane transporter activity (PMID:21873635 [IBA] PANTHER:PTN000115815|SGD:S000001658|TAIR:locus:2206011|TAIR:locus:2062576|PomBase:SPBC16D10.06|FB:FBgn0033096|MGI:MGI:1353474|SGD:S000004120|MGI:MGI:2684326|SGD:S000003224|UniProtKB:O04089|TAIR:locus:2087705|F…		C2_02590W_A|orf19.9158|IPF25789.1|IPF13128.2|Contig4-3005_0008|orf6.5335|CA3160|CaO19.1585|CaO19.9158|orf19.1585|C2_02590W_B|C2_02590W|CAWG_04027	gene_product	taxon:237561	20180604	CGD			270	32.5981	47.0316	50.8391	272	32.9517	47.3031	49.6582	301	38.1622	55.0717	54.7877	22043	2583.43	3962.88	4344.01	21216	2351.84	3726.98	3360.28	17900	2065.21	3368.88	2887.33
CAALFM_C401340WA	NC_032092.1	273215..273544	3635601	29.3627	583.61	9.18886	0.000121528	0.000537249	0.741079																	0	0	0	0	0	0	0	0	0	0	0	0	88	34.7849	53.3586	17.3421	77	28.7883	45.621	12.1956	63	24.515	39.9903	10.1621
LAP3	NC_032096.1	complement(988875..990404)	3641012	1330.51	20.7648	4.37607	6.80269e-224	6.70632e-221	4.14828e-220	LAP3	CGD	CAL0000187653	LAP3	acts_upstream_of_or_within	0034727 // piecemeal microautophagy of nucleus (CGD_REF:CAL0000228661|PMID:33472984 [RCA]) /// 0008643 // carbohydrate transport (CGD_REF:CAL0000228661|PMID:33472984 [RCA]) /// 0006508 // proteolysis (CGD_REF:CAL0142013 [IEA] InterPro:IPR004134) /// 0006508 // proteolysis (CGD_REF:CAL0000228661|PMID:33472984 [RCA]) /// 0009636 // response to toxic substance (PMID:21873635 [IBA] PANTHER:PTN0016218…	0005737 // cytoplasm (PMID:21873635 [IBA] PANTHER:PTN001621808|UniProtKB:Q13867|SGD:S000005183) /// 0005737 // cytoplasm (CGD_REF:CAL0121033 [IEA] SGD:S000005183)	0008234 // cysteine-type peptidase activity (CGD_REF:CAL0121033 [IEA] SGD:S000005183) /// 0008234 // cysteine-type peptidase activity (PMID:21873635 [IBA] PANTHER:PTN001621808|SGD:S000005183) /// 0004197 // cysteine-type endopeptidase activity (CGD_REF:CAL0142013 [IEA] InterPro:IPR004134) /// 0004177 // aminopeptidase activity (CGD_REF:CAL0082083|PMID:15387822 [NAS]) /// 0000978 // RNA polymerase…		CR_04480C_A|orf19.8172|orf6.6751|IPF26781.1|IPF4292.2|CA4250|CaO19.8172|CaO19.539|IPF4292|orf19.539|CR_04480C_B|CR_04480C|CAWG_01783	gene_product	taxon:237561	20210223	CGD			756	66.3979	95.7969	142.349	706	62.2181	89.3159	128.892	682	62.9006	90.7717	124.137	14434	1230.6	1887.69	2844.5	16969	1368.37	2168.47	2687.62	16592	1392.56	2271.62	2676.35
PGA13	NC_032096.1	1838763..1840133	3642138	171.554	26.3347	4.71889	1.98337e-165	8.37974e-163	1.20946e-161	PGA13	CGD	CAL0000178196	PGA13	acts_upstream_of_or_within	0008643 // carbohydrate transport (CGD_REF:CAL0000228661|PMID:33472984 [RCA]) /// 0060257 // negative regulation of flocculation (CGD_REF:CAL0000144044|PMID:22343036 [IMP]) /// 0031505 // fungal-type cell wall organization (CGD_REF:CAL0000144044|PMID:22343036 [IMP]) /// 0044182 // filamentous growth of a population of unicellular organisms (CGD_REF:CAL0000144044|PMID:22343036 [IMP]) /// 0030447 /…	0009986 // cell surface (CGD_REF:CAL0080724|PMID:12845604 [ISS]) /// 0009986 // cell surface (CGD_REF:CAL0087891|PMID:12734798 [ISS]) /// 0009277 // fungal-type cell wall (CGD_REF:CAL0000144044|PMID:22343036 [IDA])	0003674 // molecular_function (CGD_REF:CAL0125086 [ND])		CR_08510W_A|orf19.13778|IPF20734.1|IPF1341.1|Contig4-3073_0004|orf6.7834|CA5112|CaO19.6420|CaO19.13778|IPF1341|orf19.6420|CR_08510W_B|CR_08510W|CAWG_02138	gene_product	taxon:237561	20210223	CGD			81	7.93911	11.4543	15.2517	54	5.3108	7.6238	9.85862	61	6.27847	9.06045	11.1031	1858	176.779	271.171	366.155	1851	166.575	263.972	293.169	1829	171.31	279.45	295.024
Name (Downregulated DEGs)	Chromosome	Region	Identifier	CAET vs. Wild Type - Max group means	CAET vs. Wild Type - Fold change	CAET vs. Wild Type - Log fold change	CAET vs. Wild Type - P-value	CAET vs. Wild Type - FDR p-value	CAET vs. Wild Type - Bonferroni	Feature ID	Database	Database identifier	Database symbol	Qualifier	GO biological process	GO cellular component	GO molecular function	Database object name	Synonym	Database object type	Taxon ID	Date	Assigned by	Annotation extension	Gene product form ID	MT523_rRNAfree_fwd (GE) - Total counts	MT523_rRNAfree_fwd (GE) - RPKM	MT523_rRNAfree_fwd (GE) - TPM	MT523_rRNAfree_fwd (GE) - CPM	MT524_rRNAfree_fwd (GE) - Total counts	MT524_rRNAfree_fwd (GE) - RPKM	MT524_rRNAfree_fwd (GE) - TPM	MT524_rRNAfree_fwd (GE) - CPM	MT525_rRNAfree_fwd (GE) - Total counts	MT525_rRNAfree_fwd (GE) - RPKM	MT525_rRNAfree_fwd (GE) - TPM	MT525_rRNAfree_fwd (GE) - CPM	MT526_rRNAfree_fwd (GE) - Total counts	MT526_rRNAfree_fwd (GE) - RPKM	MT526_rRNAfree_fwd (GE) - TPM	MT526_rRNAfree_fwd (GE) - CPM	MT527_rRNAfree_fwd (GE) - Total counts	MT527_rRNAfree_fwd (GE) - RPKM	MT527_rRNAfree_fwd (GE) - TPM	MT527_rRNAfree_fwd (GE) - CPM	MT528_rRNAfree_fwd (GE) - Total counts	MT528_rRNAfree_fwd (GE) - RPKM	MT528_rRNAfree_fwd (GE) - TPM	MT528_rRNAfree_fwd (GE) - CPM
BTA1	NC_032089.1	complement(2524641..2526899)	3645347	3.14085	-7.20144	-2.84829	1.9217e-12	2.2825e-11	1.17185e-08	BTA1	CGD	CAL0000198004	BTA1	enables	0008150 // biological_process (CGD_REF:CAL0125086 [ND])	0005575 // cellular_component (CGD_REF:CAL0125086 [ND])	0003674 // molecular_function (CGD_REF:CAL0125086 [ND])		C1_11490C_A|orf19.8764|IPF26156.1|IPF7635.2|Contig4-2602_0002|orf6.3438|CA1783|CaO19.8764|CaO19.1171|IPF7635|orf19.1171|C1_11490C_B|C1_11490C|CAWG_00288	gene_product	taxon:237561	20220104	CGD			68	4.04498	5.83598	12.8039	43	2.56659	3.68441	7.85038	45	2.81098	4.05652	8.19085	8	0.46195	0.708613	1.57656	2	0.109233	0.173102	0.316768	13	0.73898	1.20547	2.09694
CAALFM_CR08830WA	NC_032096.1	1898484..1898747	30515450	9.2376	-13.1601	-3.7181	6.58016e-06	3.7788e-05	0.0401258																	33	16.7971	24.2343	6.21367	13	6.63962	9.53136	2.37337	8	4.2761	6.17083	1.45615	3	1.48231	2.2738	0.591209	1	0.467343	0.740601	0.158384	0	0	0	0
HSP30	NC_032089.1	411340..412368	3645419	11.1793	-6.40107	-2.67831	4.67398e-18	8.86109e-17	2.85019e-14	HSP30	CGD	CAL0000192328	HSP30	acts_upstream_of_or_within	0008643 // carbohydrate transport (CGD_REF:CAL0000228661|PMID:33472984 [RCA]) /// 0032780 // negative regulation of ATPase activity (CGD_REF:CAL0121033 [IEA] SGD:S000000615) /// 0006811 // ion transport (CGD_REF:CAL0142013 [IEA] InterPro:IPR001425)	0005886 // plasma membrane (PMID:21873635 [IBA] PANTHER:PTN002001475|CGD:CAL0000192328|SGD:S000000258|SGD:S000000615|SGD:S000002440) /// 0005886 // plasma membrane (CGD_REF:CAL0121033 [IEA] SGD:S000000615) /// 0005886 // plasma membrane (CGD_REF:CAL0124396|PMID:19824013 [IDA])	0005216 // ion channel activity (CGD_REF:CAL0142013 [IEA] InterPro:IPR001425)		C1_01990W_A|orf19.12001|IPF22718.1|IPF9978.2|Contig4-2702_0008|Contig4-2702_0009|orf6.3045|CA1507|CaO19.12001|CaO19.4526|orf19.4526|C1_01990W_B|C1_01990W|CAWG_01183	gene_product	taxon:237561	20210223	CGD			92	12.0143	17.3338	17.323	91	11.9242	17.1175	16.6136	70	9.5994	13.8529	12.7413	21	2.66211	4.08356	4.13846	9	1.07911	1.71008	1.42546	12	1.49752	2.44283	1.93564
THI4	NC_032091.1	complement(1099836..1100900)	3635160	131.603	-48.258	-5.5927	5.83313e-133	2.15644e-130	3.55704e-129	THI4	CGD	CAL0000199344	THI4	acts_upstream_of_or_within	0052837 // thiazole biosynthetic process (CGD_REF:CAL0121033 [IEA] PomBase:SPBC26H8.01|SGD:S000003376) /// 0008643 // carbohydrate transport (CGD_REF:CAL0000228661|PMID:33472984 [RCA]) /// 0009228 // thiamine biosynthetic process (CGD_REF:CAL0121033 [IEA] PomBase:SPBC26H8.01|SGD:S000003376) /// 0008152 // metabolic process (CGD_REF:CAL0000228661|PMID:33472984 [RCA]) /// 0000002 // mitochondrial g…	0005829 // cytosol (CGD_REF:CAL0121033 [IEA] SGD:S000003376)	0008198 // ferrous iron binding (CGD_REF:CAL0121033 [IEA] SGD:S000003376)		C3_05130C_A|orf19.13407|IPF21233.1|IPF14.1|Contig4-2427_0005|orf6.9051|CA6075|CaO19.13407|CaO19.5986|orf19.5986|C3_05130C_B|C3_05130C|CAWG_02825	gene_product	taxon:237561	20210223	CGD			1045	131.853	190.234	196.766	1066	134.962	193.742	194.616	966	127.994	184.708	175.83	33	4.0419	6.20011	6.5033	24	2.78036	4.40606	3.80122	10	1.20575	1.96688	1.61303
OPT1	NC_032096.1	complement(440887..443238)	3640150	71.5776	-10.4622	-3.38711	1.1196e-92	1.83956e-90	6.8273e-89	OPT1	CGD	A0A1D8PS46, CAL0000194963	OPT1	acts_upstream_of_or_within	0035672 // oligopeptide transmembrane transport (CGD_REF:CAL0115924|PMID:16629678 [IGI] CGD:CAL0001204|CGD:CAL0001200) /// 0008643 // carbohydrate transport (CGD_REF:CAL0000228661|PMID:33472984 [RCA]) /// 1901583 // tetrapeptide transmembrane transport (CGD_REF:CAL0121033 [IEA] PomBase:SPBC29B5.02c) /// 0006857 // oligopeptide transport (CGD_REF:CAL0082145|PMID:15474295 [IMP]) /// 0006857 // olig…	0005886 // plasma membrane (CGD_REF:CAL0121033 [IEA] PomBase:SPBC29B5.02c) /// 0005887 // integral component of plasma membrane (PMID:21873635 [IBA] PANTHER:PTN000503382|PomBase:SPAC29B12.10c|SGD:S000003748) /// 0005794 // Golgi apparatus (CGD_REF:CAL0121033 [IEA] PomBase:SPBC29B5.02c) /// 0016021 // integral component of membrane (CGD_REF:CAL0081616|PMID:9043116 [ISS]) /// 0005887 // integral co…	1904680 // peptide transmembrane transporter activity (CGD_REF:CAL0081616|PMID:9043116 [IGI] SGD:S000001801) /// 1901584 // tetrapeptide transmembrane transporter activity (CGD_REF:CAL0121033 [IEA] PomBase:SPBC29B5.02c) /// 0035673 // oligopeptide transmembrane transporter activity (CGD_REF:CAL0121033 [IEA] SGD:S000003748) /// 0005427 // proton-dependent oligopeptide secondary active transmembran…		CR_02020C_A|orf19.10133|IPF24733.1|IPF14139.2|Contig4-1813_0003|Contig4-2970_0016|orf6.3597|CA1902|CaO19.2602|CaO19.10133|orf19.2602|CR_02020C_B|CR_02020C	gene_product	taxon:237561	20210223	CGD			1197	68.3882	98.6683	225.387	1254	71.8892	103.199	228.939	1241	74.4554	107.446	225.885	152	8.43	12.9313	29.9546	123	6.4522	10.2248	19.4812	99	5.40509	8.81711	15.969
SNZ1	NC_032089.1	complement(541722..542600)	3636803	165.73	-7.22502	-2.853	2.31888e-80	2.98178e-78	1.41406e-76	SNZ1	CGD	CAL0000181647	SNZ1	acts_upstream_of_or_within	0042823 // pyridoxal phosphate biosynthetic process (CGD_REF:CAL0121033 [IEA] PomBase:SPAC29B12.04) /// 0008615 // pyridoxine biosynthetic process (CGD_REF:CAL0121033 [IEA] SGD:S000004702) /// 0008152 // metabolic process (CGD_REF:CAL0000228661|PMID:33472984 [RCA]) /// 0006535 // cysteine biosynthetic process from serine (CGD_REF:CAL0121033 [IEA] PomBase:SPAC29B12.04) /// 0008615 // pyridoxine bi…	0005737 // cytoplasm (CGD_REF:CAL0116208|PMID:16804178 [IDA]) /// 1903600 // glutaminase complex (CGD_REF:CAL0121033 [IEA] SGD:S000004702)	0004359 // glutaminase activity (CGD_REF:CAL0121033 [IEA] SGD:S000004702) /// 0016843 // amine-lyase activity (PMID:21873635 [IBA] PANTHER:PTN000782634|SGD:S000004702|UniProtKB:P9WII9|SGD:S000001835) /// 0036381 // pyridoxal 5'-phosphate synthase (glutamine hydrolysing) activity (CGD_REF:CAL0121033 [IEA] SGD:S000004702)		C1_02590C_A|orf19.10464|IPF24330.1|IPF10248.2|Contig4-2682_0003|orf6.6669|CA4184|SNZ99|CaO19.2947|CaO19.10464|orf19.2947|C1_02590C_B|C1_02590C|CAWG_01124	gene_product	taxon:237561	20210223	CGD			1121	171.372	247.251	211.076	1044	160.146	229.894	190.6	1032	165.673	239.083	187.843	166	24.6343	37.7881	32.7136	175	24.5634	38.9258	27.7172	134	19.5759	31.9333	21.6146
ACO2	NC_032096.1	complement(1225928..1228303)	3646708	133.905	-7.33302	-2.87441	1.3078e-93	2.21018e-91	7.97497e-90	ACO2	CGD	A0A1D8PT27, CAL0000193227, CAL0129230	ACO2	enables	0006099 // tricarboxylic acid cycle (CGD_REF:CAL0121033 [IEA] SGD:S000003736) /// 0032543 // mitochondrial translation (CGD_REF:CAL0121033 [IEA] PomBase:SPBP4H10.15)	0005634 // nucleus (CGD_REF:CAL0121033 [IEA] PomBase:SPBP4H10.15) /// 0005829 // cytosol (PMID:21873635 [IBA] PANTHER:PTN001705783|SGD:S000004295|UniProtKB:P36683) /// 0005739 // mitochondrion (CGD_REF:CAL0121033 [IEA] PomBase:SPBP4H10.15) /// 0005739 // mitochondrion (PMID:21873635 [IBA] PANTHER:PTN000186534|PomBase:SPAC24C9.06c|RGD:621360|SGD:S000004295|PomBase:SPBP4H10.15|FB:FBgn0010100|MGI:MG…	0051539 // 4 iron, 4 sulfur cluster binding (PMID:21873635 [IBA] PANTHER:PTN000186533|RGD:621360|UniProtKB:P36683|UniProtKB:P20004) /// 0003994 // aconitate hydratase activity (PMID:21873635 [IBA] PANTHER:PTN000186533|UniProtKB:Q8ZRS8|RGD:621360|UniProtKB:C8VG90|UniProtKB:P20004|MGI:MGI:87880|SGD:S000004295|UniProtKB:Q99798|UniProtKB:P36683) /// 0051539 // 4 iron, 4 sulfur cluster binding (CGD_RE…		CR_05790C_A|orf19.13953|orf6.6529|IPF20499.1|IPF2530.2|Contig4-2856_0004|CA4077|CaO19.13953|CaO19.6632|orf19.6632|CR_05790C_B|CR_05790C|CAWG_01900	gene_product	taxon:237561	20210202	CGD			2250	127.251	183.593	423.659	2353	133.53	191.686	429.58	2373	140.933	203.38	431.931	359	19.7092	30.2331	70.748	366	19.0053	30.1178	57.9686	292	15.7813	25.7433	47.1006
THI13	NC_032096.1	1972214..1973233	3641921	381.512	-25.4592	-4.67011	1.40193e-177	8.29242e-175	8.54897e-174	THI13	CGD	CAL0000188398	THI13	acts_upstream_of_or_within	0009228 // thiamine biosynthetic process (CGD_REF:CAL0000157290|PMID:22568620 [IDA]) /// 0008643 // carbohydrate transport (CGD_REF:CAL0000228661|PMID:33472984 [RCA]) /// 0009228 // thiamine biosynthetic process (CGD_REF:CAL0121033 [IEA] PomBase:SPCC1223.02|SGD:S000002403) /// 0009228 // thiamine biosynthetic process (PMID:21873635 [IBA] PANTHER:PTN001267680|CGD:CAL0000188398|PomBase:SPCC1223.02|…	0005575 // cellular_component (CGD_REF:CAL0125086 [ND])	0003674 // molecular_function (CGD_REF:CAL0125086 [ND])		CR_09290W_A|IPF1974.1|Contig4-3033_0005|orf6.8405|CA5560|CaO19.7324|THI5|orf19.7324|CR_09290W_B|CR_09290W|CAWG_02199	gene_product	taxon:237561	20210223	CGD			3041	400.627	578.012	572.599	2873	379.786	545.194	524.515	2632	364.122	525.464	479.074	119	15.2184	23.3444	23.4513	148	17.902	28.3694	23.4408	94	11.834	19.3044	15.1625
LYS22	NC_032090.1	931947..933200	3645466	132.019	-7.89509	-2.98096	1.5489e-97	2.77628e-95	9.44516e-94	LYS22	CGD	CAL0000201759	LYS22	enables	0009085 // lysine biosynthetic process (CGD_REF:CAL0000212790|PMID:26363118 [IDA]) /// 0009085 // lysine biosynthetic process (CGD_REF:CAL0121033 [IEA] PomBase:SPBC1105.02c) /// 0019878 // lysine biosynthetic process via aminoadipic acid (CGD_REF:CAL0121033 [IEA] PomBase:SPBC1105.02c) /// 0019878 // lysine biosynthetic process via aminoadipic acid (PMID:21873635 [IBA] PANTHER:PTN002231832|SGD:S00…	0005575 // cellular_component (CGD_REF:CAL0125086 [ND])	0004410 // homocitrate synthase activity (CGD_REF:CAL0121033 [IEA] PomBase:SPBC1105.02c) /// 0004410 // homocitrate synthase activity (CGD_REF:CAL0000212790|PMID:26363118 [IDA]) /// 0004410 // homocitrate synthase activity (PMID:21873635 [IBA] PANTHER:PTN002231832|CGD:CAL0000201759|SGD:S000002289|PomBase:SPBC1105.02c|SGD:S000002341|CGD:CAL0000190246)		C2_04460W_A|orf19.11982|IPF18482.1|IPF15851.2|Contig4-2894_0013|orf6.4198|orf6.5005|CA2335|CaO19.4506|LYS211|LYS21|orf19.4506|C2_04460W_B|C2_04460W|CAWG_04202	gene_product	taxon:237561	20151005	CGD			1325	141.985	204.852	249.488	1240	133.33	191.399	226.383	1073	120.744	174.245	195.306	161	16.7475	25.69	31.7282	171	16.8244	26.6616	27.0837	164	16.7939	27.3952	26.4537
PGA10	NC_032092.1	complement(72788..73540)	3645009	265.121	-9.81772	-3.29539	1.51665e-98	2.80343e-96	9.24852e-95	PGA10	CGD	Q59UP6, CAL0000193946	PGA10	located_in	0044011 // single-species biofilm formation on inanimate substrate (CGD_REF:CAL0000158903|PMID:23563485 [IMP]) /// 0006696 // ergosterol biosynthetic process (CGD_REF:CAL0000228661|PMID:33472984 [RCA]) /// 0044011 // single-species biofilm formation on inanimate substrate (CGD_REF:CAL0116848|PMID:17042757 [IMP]) /// 0020028 // hemoglobin import (CGD_REF:CAL0119004|PMID:18466294 [IMP]) /// 0006879…	0009277 // fungal-type cell wall (PMID:21873635 [IBA] PANTHER:PTN002441280|UniProtKB:Q59UP6|CGD:CAL0000195131|CGD:CAL0000201940) /// 0009986 // cell surface (CGD_REF:CAL0080724|PMID:12845604 [ISS]) /// 0009986 // cell surface (CGD_REF:CAL0087891|PMID:12734798 [ISS]) /// 0005576 // extracellular region (PMID:21873635 [IBA] PANTHER:PTN002441280|CGD:CAL0000201350|CGD:CAL0000195131) /// 0009277 // fu…	0020037 // heme binding (CGD_REF:CAL0082082|PMID:15306022 [IGI]) /// 0020037 // heme binding (PMID:21873635 [IBA] PANTHER:PTN002441280|CGD:CAL0000201940|CGD:CAL0000195131|CGD:CAL0000201350|CGD:CAL0000201827|UniProtKB:Q59UP6) /// 0020037 // heme binding (CGD_REF:CAL0082082|PMID:15306022 [IDA])		C4_00450C_A|orf19.13119|RBT51|RBT8|IPF21543.1|IPF20169.1|Contig4-2948_0005|orf6.6914|CA4381|CRW2|CaO19.5674|CaO19.13119|IPF20169|orf19.5674|C4_00450C_B|C4_00450C|CAWG_03738	gene_product	taxon:237561	20140625	CGD			1601	285.707	412.209	301.457	1492	267.164	383.521	272.39	1294	242.494	349.943	235.532	177	30.6619	47.0342	34.8813	159	26.0521	41.2848	25.1831	141	24.0453	39.224	22.7438
CAALFM_C112940CA	NC_032089.1	complement(2815280..2815492)	30515067	2.78865	-6.06134	-2.59964	0.0147162	0.0378463	1																	5	3.15438	4.55105	0.941465	3	1.89909	2.7262	0.547701	5	3.31247	4.78022	0.910094	0	0	0	0	1	0.579242	0.917928	0.158384	1	0.602873	0.983442	0.161303
CAALFM_CR06430WA	NC_032096.1	1366337..1367128	3645282	1.55084	-6.74651	-2.75414	0.00065206	0.00246923	1																	13	2.20568	3.18228	2.44781	6	1.02148	1.46636	1.0954	8	1.42537	2.05694	1.45615	0	0	0	0	2	0.311562	0.493734	0.316768	2	0.324273	0.528972	0.322607
TRY6	NC_032091.1	1548990..1550393	3638499	13.7275	-8.93671	-3.15974	1.6553e-25	5.07311e-24	1.0094e-21	TRY6	CGD	CAL0000178438	TRY6	acts_upstream_of_or_within	0008643 // carbohydrate transport (CGD_REF:CAL0000228661|PMID:33472984 [RCA]) /// 0010811 // positive regulation of cell-substrate adhesion (CGD_REF:CAL0000144048|PMID:22359502 [IMP]) /// 0000422 // mitophagy (CGD_REF:CAL0000228661|PMID:33472984 [RCA]) /// 1900189 // positive regulation of cell adhesion involved in single-species biofilm formation (CGD_REF:CAL0000144048|PMID:22359502 [IMP]) /// 0…	0005575 // cellular_component (CGD_REF:CAL0125086 [ND])	0046983 // protein dimerization activity (CGD_REF:CAL0142013 [IEA] InterPro:IPR011598)		C3_06790W_A|orf19.14116|IPF20362.1|IPF2419.1|Contig4-2745_0006|orf6.8807|CA5885|CaO19.6824|CaO19.14116|IPF2419|orf19.6824|C3_06790W_B|C3_06790W	gene_product	taxon:237561	20210223	CGD			89	8.51819	12.2898	16.7581	135	12.9649	18.6115	24.6465	196	19.6993	28.428	35.6757	17	1.57944	2.4228	3.35018	18	1.58178	2.50665	2.85091	15	1.37192	2.23796	2.41955
CAALFM_C400530CA	NC_032092.1	complement(91405..92481)	3645746	3.36669	-25.2517	-4.65831	4.91699e-08	3.77714e-07	0.000299838																	14	1.74677	2.52019	2.6361	28	3.50547	5.0322	5.11188	37	4.84783	6.9959	6.7347	1	0.121117	0.185789	0.19707	2	0.229115	0.36308	0.316768	0	0	0	0
PUT1	NC_032093.1	580917..582386	3637779	66.9457	-14.4875	-3.85674	3.93273e-101	7.5039e-99	2.39818e-97	PUT1	CGD	A0A1D8PNH4, CAL0000197353	PUT1	acts_upstream_of_or_within	0006537 // glutamate biosynthetic process (CGD_REF:CAL0142013 [IEA] InterPro:IPR002872) /// 0008643 // carbohydrate transport (CGD_REF:CAL0000228661|PMID:33472984 [RCA]) /// 0000422 // mitophagy (CGD_REF:CAL0000228661|PMID:33472984 [RCA]) /// 0010133 // proline catabolic process to glutamate (CGD_REF:CAL0121033 [IEA] SGD:S000004132) /// 0010133 // proline catabolic process to glutamate (PMID:2187…	0005739 // mitochondrion (CGD_REF:CAL0000228832|PMID:34460867 [IDA]) /// 0005739 // mitochondrion (CGD_REF:CAL0121033 [IEA] SGD:S000004132) /// 0005739 // mitochondrion (PMID:21873635 [IBA] PANTHER:PTN000357758|SGD:S000004132|FB:FBgn0003423|TAIR:locus:2089706|UniProtKB:A0A1D8PNH4|UniProtKB:O43272|RGD:1590932|MGI:MGI:97770|TAIR:locus:2166645)	0004657 // proline dehydrogenase activity (PMID:21873635 [IBA] PANTHER:PTN000357758|TAIR:locus:2166645|TAIR:locus:2089706|UniProtKB:O43272|FB:FBgn0003423|RGD:1590932|SGD:S000004132) /// 0071949 // FAD binding (PMID:21873635 [IBA] PANTHER:PTN000357758|UniProtKB:O43272) /// 0004657 // proline dehydrogenase activity (CGD_REF:CAL0121033 [IEA] SGD:S000004132)		C5_02600W_A|orf19.11750|IPF22968.1|IPF8739.2|Contig4-2872_0006|orf6.3112|orf6.3483|CA1552|CaO19.4274|IPF8739.1|orf19.4274|C5_02600W_B|C5_02600W|CAWG_04642	gene_product	taxon:237561	20210223	CGD			655	59.8754	86.3863	123.332	777	71.2701	102.31	141.855	726	69.6917	100.572	132.146	32	2.83958	4.3558	6.30623	54	4.53228	7.18232	8.55274	75	6.55163	10.6874	12.0978
PHO84	NC_032089.1	2522233..2523870	3645348	674.775	-17.261	-4.10945	9.46618e-166	4.30711e-163	5.77248e-162	PHO84	CGD	CAL0127774, CAL0000178178	PHO84	acts_upstream_of_or_within	0006797 // polyphosphate metabolic process (CGD_REF:CAL0121033 [IEA] SGD:S000004592) /// 0006817 // phosphate ion transport (CGD_REF:CAL0121033 [IEA] SGD:S000004592) /// 0097080 // plasma membrane selenite transport (CGD_REF:CAL0121033 [IEA] SGD:S000004592) /// 0034599 // cellular response to oxidative stress (CGD_REF:CAL0000215515|PMID:30059535 [IMP]) /// 0006817 // phosphate ion transport (CGD_…	0016020 // membrane (CGD_REF:CAL0121276|PMID:19055746 [ISS]) /// 0005887 // integral component of plasma membrane (CGD_REF:CAL0121033 [IEA] SGD:S000004592)	0005315 // inorganic phosphate transmembrane transporter activity (CGD_REF:CAL0121033 [IEA] SGD:S000004592) /// 0048249 // high-affinity phosphate transmembrane transporter activity (CGD_REF:CAL0082137|PMID:12397174 [NAS]) /// 0005384 // manganese ion transmembrane transporter activity (CGD_REF:CAL0121033 [IEA] SGD:S000004592) /// 0097079 // selenite:proton symporter activity (CGD_REF:CAL0121033 …		C1_11480W_A|orf19.8269|orf19.8765|IPF26171.1|IPF7638.2|IPF26640.1|IPF5438.2|orf6.447|orf6.3437|CA1782|CA0083|orf19.1172|PHO84.5eoc|orf19.655|C1_11480W_B|C1_11480W|CAWG_00289	gene_product	taxon:237561	20180814	CGD			7956	652.687	941.677	1498.06	8144	670.39	962.364	1486.83	8140	701.249	1011.97	1481.63	544	43.3218	66.4539	107.206	465	35.0251	55.5044	73.6486	487	38.1786	62.2792	78.5547
HGT2	NC_032089.1	complement(434412..436049)	3644579	108.689	-22.8725	-4.51554	3.56209e-173	1.91543e-170	2.17216e-169	HGT2	CGD	CAL0000184480	HGT2	acts_upstream_of_or_within	1904659 // glucose transmembrane transport (CGD_REF:CAL0081376|PMID:12187386 [ISS]) /// 0008643 // carbohydrate transport (CGD_REF:CAL0000228661|PMID:33472984 [RCA]) /// 0008643 // carbohydrate transport (PMID:21873635 [IBA] PANTHER:PTN000627328|UniProtKB:A0A1D8PCL1|SGD:S000002753|SGD:S000001138|SGD:S000000795|PomBase:SPCC1235.14|SGD:S000002406|SGD:S000003919|SGD:S000005355|PomBase:SPBC4B4.08|SGD…	0016020 // membrane (PMID:21873635 [IBA] PANTHER:PTN000627328|SGD:S000002751|PomBase:SPBC4B4.08|CGD:CAL0000181092|PomBase:SPCC1235.13|SGD:S000002297|PomBase:SPCC1235.14|SGD:S000001134|SGD:S000002753|UniProtKB:A0A1D8PCL1|SGD:S000002750|PomBase:SPCC548.06c|SGD:S000002353|SGD:S000002944|SGD:S000004071|UniProtKB:A0A1D8PQJ5|PomBase:SPBC1683.08|PomBase:SPAC1F8.01|CGD:CAL0000184480|UniProtKB:A0A1D8PG81|…	0051119 // sugar transmembrane transporter activity (CGD_REF:CAL0121276|PMID:19055746 [ISS]) /// 0005355 // glucose transmembrane transporter activity (CGD_REF:CAL0081376|PMID:12187386 [ISS]) /// 0005351 // sugar:proton symporter activity (PMID:21873635 [IBA] PANTHER:PTN000627328|SGD:S000003521|PomBase:SPCC548.07c)		C1_02110C_A|orf19.11152|RGT2|IPF23590.1|IPF5315.2|Contig4-3059_0006|orf6.6479|CA4038|CaO19.3668|CaO19.11152|HGT12|orf19.3668|C1_02110C_B|C1_02110C|CAWG_01172	gene_product	taxon:237561	20210223	CGD			1345	110.34	159.195	253.254	1279	105.283	151.137	233.503	1282	110.442	159.379	233.348	66	5.25595	8.06242	13.0066	52	3.91678	6.20694	8.23597	66	5.17411	8.44031	10.646
PUT2	NC_032093.1	complement(1062043..1063830)	3636439	88.5108	-8.13295	-3.02378	9.75147e-102	1.98896e-99	5.94644e-98	PUT2	CGD	CAL0000194832	PUT2	acts_upstream_of_or_within	0006561 // proline biosynthetic process (CGD_REF:CAL0142013 [IEA] InterPro:IPR005931) /// 0010133 // proline catabolic process to glutamate (CGD_REF:CAL0121033 [IEA] SGD:S000001079) /// 0010133 // proline catabolic process to glutamate (PMID:21873635 [IBA] PANTHER:PTN000193023|UniProtKB:Q9I5F6|UniProtKB:P09546|UniProtKB:P10503|SGD:S000001079) /// 0006537 // glutamate biosynthetic process (CGD_REF…	0005739 // mitochondrion (CGD_REF:CAL0000228832|PMID:34460867 [IDA]) /// 0005759 // mitochondrial matrix (CGD_REF:CAL0121033 [IEA] SGD:S000001079) /// 0005759 // mitochondrial matrix (PMID:21873635 [IBA] PANTHER:PTN000193024|SGD:S000001079)	0003842 // 1-pyrroline-5-carboxylate dehydrogenase activity (PMID:21873635 [IBA] PANTHER:PTN000193023|SGD:S000001079|UniProtKB:P09546|UniProtKB:Q9I5F6|UniProtKB:P10503) /// 0003842 // 1-pyrroline-5-carboxylate dehydrogenase activity (CGD_REF:CAL0121033 [IEA] SGD:S000001079) /// 0016620 // oxidoreductase activity, acting on the aldehyde or oxo group of donors, NAD or NADP as acceptor (CGD_REF:CAL0…		C5_04880C_A|orf19.11457|IPF23228.1|IPF13622.2|Contig4-3081_0050|orf6.5650|CA3399|CaO19.11457|CaO19.3974|orf19.3974|C5_04880C_B|C5_04880C|CAWG_04854	gene_product	taxon:237561	20210202	CGD			1165	87.5553	126.322	219.361	1144	86.2704	123.844	208.857	1162	91.7065	132.342	211.506	158	11.5269	17.6817	31.137	132	9.10849	14.4343	20.9067	170	12.2092	19.9163	27.4216
HSP31	NC_032089.1	427843..428838	3644589	12.5066	-18.0964	-4.17763	8.35069e-25	2.39778e-23	5.09225e-21	HSP31	CGD	CAL0000180035, CAL0127480	HSP31	acts_upstream_of_or_within	0008643 // carbohydrate transport (CGD_REF:CAL0000228661|PMID:33472984 [RCA]) /// 0006811 // ion transport (CGD_REF:CAL0142013 [IEA] InterPro:IPR001425) /// 0008150 // biological_process (CGD_REF:CAL0125086 [ND])	0005737 // cytoplasm (CGD_REF:CAL0121033 [IEA] PomBase:SPCC757.03c) /// 0005886 // plasma membrane (PMID:21873635 [IBA] PANTHER:PTN002001475|CGD:CAL0000192328|SGD:S000000258|SGD:S000000615|SGD:S000002440) /// 0005634 // nucleus (CGD_REF:CAL0121033 [IEA] PomBase:SPCC757.03c) /// 0062040 /// 0016020 // membrane (CGD_REF:CAL0142013 [IEA] InterPro:IPR001425) /// 0005829 // cytosol (CGD_REF:CAL0139867…	0019172 // glyoxalase III activity (CGD_REF:CAL0121033 [IEA] PomBase:SPCC757.03c) /// 0005216 // ion channel activity (CGD_REF:CAL0142013 [IEA] InterPro:IPR001425)		C1_02070W_A|orf19.11148|IPF12039.2|IPF11340.3|Contig4-1615_0002|Contig4-1615_0004|orf6.6475|CA4034|CaO19.3664|orf19.3664|C1_02070W_B|C1_02070W|CAWG_01176	gene_product	taxon:237561	20210223	CGD			100	13.4916	19.4653	18.8293	99	13.4023	19.2394	18.0741	75	10.6258	15.3341	13.6514	5	0.654835	1.00449	0.985348	5	0.619371	0.98152	0.79192	6	0.773566	1.26189	0.96782
CAALFM_CR09350CA	NC_032096.1	complement(1982021..1982734)	3641901	87.0674	-6.1896	-2.62985	1.61061e-57	1.40099e-55	9.82147e-54	CAALFM_CR09350CA	UniProtKB	A0A1D8PTZ5	CAALFM_CR09350CA	is_active_in		0005829 // cytosol (PMID:21873635 [IBA] PANTHER:PTN000719820|SGD:S000000613|TAIR:locus:2145816)		Uncharacterized protein	UniProtKB:A0A1D8PTZ5|PTN002877220	protein	taxon:237561	20170228	GO_Central			457	86.0087	124.091	86.0499	507	95.7444	137.444	92.5615	402	79.4492	114.653	73.1716	70	12.7885	19.6171	13.7949	76	13.1327	20.8115	12.0372	92	16.5461	26.9909	14.8399
GIT1	NC_032090.1	complement(1334165..1335724)	3646562	59.1785	-22.7136	-4.50548	1.31102e-114	3.23111e-112	7.99458e-111	GIT1	CGD	CAL0000193792, CAL0126807	GIT1	acts_upstream_of_or_within	0001407 // glycerophosphodiester transport (CGD_REF:CAL0000143468|PMID:21984707 [IMP]) /// 0008643 // carbohydrate transport (CGD_REF:CAL0000228661|PMID:33472984 [RCA]) /// 0001407 // glycerophosphodiester transport (CGD_REF:CAL0000143468|PMID:21984707 [IDA]) /// 0055085 // transmembrane transport (CGD_REF:CAL0142013 [IEA] InterPro:IPR005828|InterPro:IPR011701) /// 0055085 // transmembrane transp…	0016021 // integral component of membrane (CGD_REF:CAL0142013 [IEA] InterPro:IPR005828) /// 0016020 // membrane (CGD_REF:CAL0121276|PMID:19055746 [ISS]) /// 0016021 // integral component of membrane (CGD_REF:CAL0142013 [IEA] InterPro:IPR005828|InterPro:IPR011701) /// 0005886 // plasma membrane (CGD_REF:CAL0121033 [IEA] SGD:S000000695) /// 0016020 // membrane (PMID:21873635 [IBA] PANTHER:PTN008282…	0022857 // transmembrane transporter activity (CGD_REF:CAL0142013 [IEA] InterPro:IPR005828|InterPro:IPR011701) /// 0001406 // glycerophosphodiester transmembrane transporter activity (CGD_REF:CAL0000143468|PMID:21984707 [IDA]) /// 0015169 // glycerol-3-phosphate transmembrane transporter activity (CGD_REF:CAL0121033 [IEA] SGD:S000000695) /// 0005315 // inorganic phosphate transmembrane transporte…		C2_06590C_A|orf19.7705|orf6.5928|IPF18890.2|IPF8874.2|Contig4-2679_0007|orf6.1824|CA3615|CaO19.34|GIT99|orf19.34|C2_06590C_B|C2_06590C|CAWG_04395	gene_product	taxon:237561	20210223	CGD			655	56.421	81.4025	123.332	721	62.3181	89.4594	131.631	650	58.7963	84.8489	118.312	25	2.09044	3.20664	4.92674	37	2.92629	4.6373	5.86021	34	2.79872	4.56544	5.48431
INO1	NC_032096.1	complement(2155482..2157044)	3638966	2051.97	-10.7438	-3.42544	4.46385e-131	1.55316e-128	2.72205e-127	INO1	CGD	CAL0000189325, CAL0129696	INO1	located_in	0034727 // piecemeal microautophagy of nucleus (CGD_REF:CAL0000228661|PMID:33472984 [RCA]) /// 0006511 // ubiquitin-dependent protein catabolic process (CGD_REF:CAL0000228661|PMID:33472984 [RCA]) /// 0043161 // proteasome-mediated ubiquitin-dependent protein catabolic process (CGD_REF:CAL0000228661|PMID:33472984 [RCA]) /// 0006021 // inositol biosynthetic process (CGD_REF:CAL0091419|PMID:1872025 …	0005622 // intracellular (CGD_REF:CAL0121033 [IEA] AspGD:ASPL0000068586) /// 0030446 // hyphal cell wall (CGD_REF:CAL0088620|PMID:1383159 [IDA]) /// 0009986 // cell surface (CGD_REF:CAL0081094|PMID:12543933 [IDA]) /// 0005737 // cytoplasm (PMID:21873635 [IBA] PANTHER:PTN000161823|TAIR:locus:2060364|TAIR:locus:2184153|dictyBase:DDB_G0285505|TAIR:locus:2135297)	0004512 // inositol-3-phosphate synthase activity (CGD_REF:CAL0121033 [IEA] SGD:S000003689) /// 0004512 // inositol-3-phosphate synthase activity (PMID:21873635 [IBA] PANTHER:PTN000161823|TAIR:locus:2060364|CGD:CAL0000189325|FB:FBgn0025885|TAIR:locus:2135297|TAIR:locus:2184153|SGD:S000003689|dictyBase:DDB_G0285505|UniProtKB:Q9NPH2) /// 0004512 // inositol-3-phosphate synthase activity (CGD_REF:CA…		CR_10100C_A|IPF904.1|Contig4-3105_0074|orf6.8933|CA5986|CaO19.7585|orf19.7585|CR_10100C_B|CR_10100C|CAWG_02271	gene_product	taxon:237561	20140625	CGD			23856	2050.99	2959.1	4491.92	24697	2130.54	3058.45	4508.86	21869	1974.38	2849.23	3980.57	2077	173.34	265.897	409.314	2529	199.632	316.358	400.553	2471	203.011	331.163	398.581
PHO100	NC_032089.1	1609045..1610016	3644483	262.846	-100.359	-6.64902	2.11462e-213	1.78685e-210	1.2895e-209	PHO100	CGD	CAL0000174526	PHO100	acts_upstream_of_or_within	0044419 // interspecies interaction between organisms (CGD_REF:CAL0122238|PMID:19151328 [IMP]) /// 0008152 // metabolic process (CGD_REF:CAL0000228661|PMID:33472984 [RCA])	0030287 // cell wall-bounded periplasmic space (CGD_REF:CAL0082509|PMID:15870471 [IDA]) /// 0005576 // extracellular region (CGD_REF:CAL0082509|PMID:15870471 [IDA]) /// 0009986 // cell surface (CGD_REF:CAL0082509|PMID:15870471 [IDA])	0003993 // acid phosphatase activity (CGD_REF:CAL0082509|PMID:15870471 [NAS])		C1_07430W_A|orf19.11902|IPF22815.1|IPF5556.1|PHO3|Contig4-2969_0004|orf6.2830|CA1363|CaO19.4424|CaO19.11902|IPF5556|orf19.4424|C1_07430W_B|C1_07430W|CAWG_00676	gene_product	taxon:237561	20210223	CGD			1899	262.532	378.773	357.568	1951	270.642	388.514	356.188	1759	255.365	368.517	320.171	19	2.54982	3.91131	3.74432	20	2.53866	4.02302	3.16768	21	2.77433	4.52565	3.38737
LYS4	NC_032092.1	complement(944103..946157)	3641180	32.935	-6.84602	-2.77527	1.65255e-72	1.77724e-70	1.00772e-68	LYS4	CGD	CAL0000195924	LYS4	acts_upstream_of_or_within	0009085 // lysine biosynthetic process (CGD_REF:CAL0000173880|PMID:24898203 [IMP]) /// 0030150 // protein import into mitochondrial matrix (CGD_REF:CAL0000228661|PMID:33472984 [RCA]) /// 0019878 // lysine biosynthetic process via aminoadipic acid (CGD_REF:CAL0121033 [IEA] PomBase:SPAC343.16|SGD:S000002642) /// 0009085 // lysine biosynthetic process (CGD_REF:CAL0121033 [IEA] PomBase:SPAC343.16)	0005739 // mitochondrion (CGD_REF:CAL0121033 [IEA] PomBase:SPAC343.16)	0004409 // homoaconitate hydratase activity (CGD_REF:CAL0142013 [IEA] InterPro:IPR004418) /// 0051539 // 4 iron, 4 sulfur cluster binding (CGD_REF:CAL0142013 [IEA] InterPro:IPR004418)		C4_04410C_A|orf19.11327|IPF23444.1|IPF4077.2|Contig4-3060_0033|orf6.7541|CA4869|CaO19.11327|CaO19.3846|orf19.3846|C4_04410C_B|C4_04410C|CAWG_03369	gene_product	taxon:237561	20140722	CGD			502	32.8259	47.3601	94.5231	498	32.6754	46.9065	90.9184	485	33.3036	48.0604	88.2791	68	4.31637	6.62113	13.4007	81	4.8631	7.70658	12.8291	85	5.31144	8.66434	13.7108
PLB1	NC_032094.1	405913..407730	3644561	131.48	-75.1656	-6.232	3.20343e-224	3.78965e-221	1.95345e-220	PLB1	CGD	CAL0133252, CAL0000177213	PLB1	acts_upstream_of_or_within	0006650 // glycerophospholipid metabolic process (CGD_REF:CAL0121033 [IEA] SGD:S000004610) /// 0009395 // phospholipid catabolic process (CGD_REF:CAL0142013 [IEA] InterPro:IPR002642) /// 0036151 // phosphatidylcholine acyl-chain remodeling (CGD_REF:CAL0121033 [IEA] SGD:S000004610) /// 0044419 // interspecies interaction between organisms (CGD_REF:CAL0124498|PMID:19839869 [IMP]) /// 0044419 // int…	0005886 // plasma membrane (CGD_REF:CAL0121033 [IEA] SGD:S000004610) /// 0005829 // cytosol (PMID:21873635 [IBA] PANTHER:PTN000076790|RGD:67366|UniProtKB:P47712|UniProtKB:P0C869|MGI:MGI:1195256|MGI:MGI:2685493) /// 0005576 // extracellular region (CGD_REF:CAL0081674|PMID:9748287 [ISS]) /// 1903561 // extracellular vesicle (CGD_REF:CAL0000216028|PMID:31412284 [IDA]) /// 0005576 // extracellular re…	0004622 // lysophospholipase activity (CGD_REF:CAL0081674|PMID:9748287 [IMP]) /// 0004622 // lysophospholipase activity (CGD_REF:CAL0121033 [IEA] SGD:S000004610) /// 0004622 // lysophospholipase activity (CGD_REF:CAL0081675|PMID:9809417 [ISS]) /// 0004623 // phospholipase A2 activity (PMID:21873635 [IBA] PANTHER:PTN000076790|UniProtKB:P0C869|MGI:MGI:1925640|UniProtKB:Q86XP0|RGD:67366|MGI:MGI:2685…		C6_01990W_A|orf19.8307|IPF26625.1|IPF9584.2|Contig4-1818_0003|orf6.3690|CA1975|CaO19.689|orf19.689|C6_01990W_B|C6_01990W|CAWG_05168	gene_product	taxon:237561	20210202	CGD			1779	131.494	189.716	334.973	1739	128.976	185.149	317.484	1726	133.97	193.332	314.165	22	1.57852	2.42139	4.33553	25	1.69663	2.68865	3.9596	28	1.97774	3.22621	4.51649
Figure 2E	GO: BP, MF, CC
#term ID	term description (Upregulation GO)	observed gene count	background gene count	strength	false discovery rate	matching proteins in your network (IDs)	matching proteins in your network (labels)
GO:0055114	Oxidation-reduction process	70	538	0.28	0.00015	237561.A0A1D8PD74,237561.A0A1D8PD78,237561.A0A1D8PDP2,237561.A0A1D8PEG2,237561.A0A1D8PEH5,237561.A0A1D8PEM4,237561.A0A1D8PH64,237561.A0A1D8PH88,237561.A0A1D8PHQ6,237561.A0A1D8PHZ2,237561.A0A1D8PI17,237561.A0A1D8PI81,237561.A0A1D8PIM0,237561.A0A1D8PJC8,237561.A0A1D8PK06,237561.A0A1D8PKB7,237561.A0A1D8PKH2,237561.A0A1D8PKY2,237561.A0A1D8PL08,237561.A0A1D8PLJ3,237561.A0A1D8PLT2,237561.A0A1D8PME3,237…	CaO19.4476,IFD6,PRN3,ZWF1,AOX2,AOX1,ADH3,ARH2,GRE2,CaO19.2202,RNR22,IFM3,IFR1,CaO19.1639,CaO19.5879,CaO19.7364,GLG2,FRP1,CaO19.5655,SOD1,CaO19.1438,CFL2,CaO19.1961,CFL5,CFL4,FET34,GPX1,HPD1,SOD3,FRP2,AHP2,CaO19.1340,CaO19.2394,CaO19.541,CaO19.6138,CaO19.3711,CaO19.6398,CaO19.7306,SOU2,FRE10,CSH1,FDH1,CaO19.6869,MRF1,GPD2,GPX2,GPD1,PST2,CaO19.1366,CaO19.2244,FRE9,CaO19.3537,AMO1,DRE2,RIB3,MAE1,PRN…
GO:0044419	Interspecies interaction between organisms	34	244	0.31	0.0206	237561.A0A1D8PME3,237561.A0A1D8PN14,237561.A0A1D8PQB9,237561.G1UB63,237561.P43076,237561.P43094,237561.P46593,237561.P87020,237561.Q59LY1,237561.Q59MD2,237561.Q59UT5,237561.Q59UY7,237561.Q59YS7,237561.Q59Z29,237561.Q5A0X8,237561.Q5A343,237561.Q5A3Z6,237561.Q5A5U9,237561.Q5A7R7,237561.Q5A8I8,237561.Q5ABE2,237561.Q5ABU7,237561.Q5AC08,237561.Q5AD07,237561.Q5AD34,237561.Q5AFI4,237561.Q5AH54,237561.Q5…	CFL2,GIT4,ALS4,CSA1,PHR1,SAP5,HWP1,PRA1,BRG1,UME6,PGA7,SEF1,MNN14,AFT2,CSA2,PGA13,SSU1,PGA31,IFF11,IHD1,HGC1,MDR1,SAP6,SOD5,PGA19,DFI1,CaO19.6484,CHK1,PGA17,SFL2,CRH12,CaO19.3932,TYE7,TEC1
GO:0009405	Pathogenesis	33	222	0.34	0.0113	237561.A0A1D8PME3,237561.A0A1D8PN14,237561.A0A1D8PQB9,237561.G1UB63,237561.P43076,237561.P43094,237561.P46593,237561.P87020,237561.Q59LY1,237561.Q59MD2,237561.Q59UT5,237561.Q59UY7,237561.Q59YS7,237561.Q59Z29,237561.Q5A0X8,237561.Q5A343,237561.Q5A3Z6,237561.Q5A5U9,237561.Q5A7R7,237561.Q5A8I8,237561.Q5ABE2,237561.Q5ABU7,237561.Q5AC08,237561.Q5AD07,237561.Q5AD34,237561.Q5AFI4,237561.Q5AH54,237561.Q5…	CFL2,GIT4,ALS4,CSA1,PHR1,SAP5,HWP1,PRA1,BRG1,UME6,PGA7,SEF1,MNN14,AFT2,CSA2,PGA13,SSU1,PGA31,IFF11,IHD1,HGC1,MDR1,SAP6,SOD5,PGA19,DFI1,CaO19.6484,CHK1,PGA17,SFL2,CRH12,TYE7,TEC1
GO:0006812	Cation transport	31	222	0.31	0.0358	237561.A0A1D8PCL1,237561.A0A1D8PEK3,237561.A0A1D8PFV0,237561.A0A1D8PFV2,237561.A0A1D8PG82,237561.A0A1D8PGH6,237561.A0A1D8PGN5,237561.A0A1D8PHV2,237561.A0A1D8PKH9,237561.A0A1D8PKY2,237561.A0A1D8PLY7,237561.A0A1D8PME3,237561.A0A1D8PMR6,237561.A0A1D8PN52,237561.A0A1D8PN54,237561.A0A1D8PPC9,237561.A0A1D8PPG4,237561.A0A1D8PQB9,237561.A0A1D8PQI6,237561.A0A1D8PTF9,237561.A0A1D8PU07,237561.Q59PA1,237561.…	HGT1,FTH1,FTR1,FTR2,HGT8,CaO19.1534,ZRT2,SMF12,JEN1,FRP1,JEN2,CFL2,ZRT1,CFL5,CFL4,FET34,CAN3,ALS4,FRP2,CaO19.6138,RTA4,FRE10,RBT5,GAP4,FRE9,CSA2,SIT1,ENA21,CaO19.6224,HGT6,CCC2
GO:0048878	Chemical homeostasis	30	168	0.42	0.0014	237561.A0A1D8PEK3,237561.A0A1D8PFV0,237561.A0A1D8PFV2,237561.A0A1D8PGH6,237561.A0A1D8PH88,237561.A0A1D8PHV2,237561.A0A1D8PKY2,237561.A0A1D8PLJ3,237561.A0A1D8PLL2,237561.A0A1D8PME3,237561.A0A1D8PN52,237561.A0A1D8PN54,237561.A0A1D8PPC9,237561.A0A1D8PQB9,237561.A0A1D8PQI6,237561.A0A1D8PTF9,237561.G1UB63,237561.P87020,237561.Q59PA1,237561.Q59UT4,237561.Q59UY7,237561.Q59Z29,237561.Q59ZI1,237561.Q5A0X8…	FTH1,FTR1,FTR2,CaO19.1534,ARH2,SMF12,FRP1,SOD1,SUL2,CFL2,CFL5,CFL4,FET34,ALS4,FRP2,CaO19.6138,CSA1,PRA1,FRE10,RBT5,SEF1,AFT2,FRE9,CSA2,SIT1,ZSF1,HMX1,CaO19.6805,CCC2,CaO19.4577
GO:0019725	Cellular homeostasis	30	183	0.38	0.0056	237561.A0A1D8PFV0,237561.A0A1D8PFV2,237561.A0A1D8PGH6,237561.A0A1D8PH88,237561.A0A1D8PHV2,237561.A0A1D8PKY2,237561.A0A1D8PLJ3,237561.A0A1D8PLL2,237561.A0A1D8PME3,237561.A0A1D8PN52,237561.A0A1D8PN54,237561.A0A1D8PPC9,237561.A0A1D8PQB9,237561.A0A1D8PQI6,237561.A0A1D8PR39,237561.A0A1D8PTF9,237561.G1UB63,237561.P87020,237561.Q59PA1,237561.Q59UT4,237561.Q59UY7,237561.Q59Z29,237561.Q59ZI1,237561.Q5A0X8…	FTR1,FTR2,CaO19.1534,ARH2,SMF12,FRP1,SOD1,SUL2,CFL2,CFL5,CFL4,FET34,ALS4,FRP2,AHP2,CaO19.6138,CSA1,PRA1,FRE10,RBT5,SEF1,AFT2,FRE9,CSA2,SIT1,ZSF1,HMX1,CaO19.6805,CCC2,CaO19.4577
GO:0098771	Inorganic ion homeostasis	29	132	0.51	0.0001	237561.A0A1D8PEK3,237561.A0A1D8PFV0,237561.A0A1D8PFV2,237561.A0A1D8PGH6,237561.A0A1D8PH88,237561.A0A1D8PHV2,237561.A0A1D8PKY2,237561.A0A1D8PLJ3,237561.A0A1D8PLL2,237561.A0A1D8PME3,237561.A0A1D8PN52,237561.A0A1D8PN54,237561.A0A1D8PPC9,237561.A0A1D8PQB9,237561.A0A1D8PQI6,237561.A0A1D8PTF9,237561.G1UB63,237561.P87020,237561.Q59PA1,237561.Q59UT4,237561.Q59UY7,237561.Q59Z29,237561.Q59ZI1,237561.Q5A0X8…	FTH1,FTR1,FTR2,CaO19.1534,ARH2,SMF12,FRP1,SOD1,SUL2,CFL2,CFL5,CFL4,FET34,ALS4,FRP2,CaO19.6138,CSA1,PRA1,FRE10,RBT5,SEF1,AFT2,FRE9,CSA2,SIT1,ZSF1,HMX1,CaO19.6805,CCC2
GO:0055080	Cation homeostasis	28	133	0.49	0.00026	237561.A0A1D8PEK3,237561.A0A1D8PFV0,237561.A0A1D8PFV2,237561.A0A1D8PGH6,237561.A0A1D8PH88,237561.A0A1D8PHV2,237561.A0A1D8PKY2,237561.A0A1D8PLJ3,237561.A0A1D8PLL2,237561.A0A1D8PME3,237561.A0A1D8PN52,237561.A0A1D8PN54,237561.A0A1D8PPC9,237561.A0A1D8PQB9,237561.A0A1D8PQI6,237561.A0A1D8PTF9,237561.G1UB63,237561.P87020,237561.Q59PA1,237561.Q59UT4,237561.Q59UY7,237561.Q59Z29,237561.Q59ZI1,237561.Q5A0X8…	FTH1,FTR1,FTR2,CaO19.1534,ARH2,SMF12,FRP1,SOD1,SUL2,CFL2,CFL5,CFL4,FET34,ALS4,FRP2,CaO19.6138,CSA1,PRA1,FRE10,RBT5,SEF1,AFT2,FRE9,CSA2,SIT1,ZSF1,HMX1,CCC2
GO:0055076	Transition metal ion homeostasis	27	86	0.66	1.97e-06	237561.A0A1D8PEK3,237561.A0A1D8PFV0,237561.A0A1D8PFV2,237561.A0A1D8PGH6,237561.A0A1D8PH88,237561.A0A1D8PHV2,237561.A0A1D8PKY2,237561.A0A1D8PLJ3,237561.A0A1D8PME3,237561.A0A1D8PN52,237561.A0A1D8PN54,237561.A0A1D8PPC9,237561.A0A1D8PQB9,237561.A0A1D8PQI6,237561.A0A1D8PTF9,237561.G1UB63,237561.P87020,237561.Q59PA1,237561.Q59UT4,237561.Q59UY7,237561.Q59Z29,237561.Q59ZI1,237561.Q5A0X8,237561.Q5A2T6,237…	FTH1,FTR1,FTR2,CaO19.1534,ARH2,SMF12,FRP1,SOD1,CFL2,CFL5,CFL4,FET34,ALS4,FRP2,CaO19.6138,CSA1,PRA1,FRE10,RBT5,SEF1,AFT2,FRE9,CSA2,SIT1,ZSF1,HMX1,CCC2
GO:0046916	Cellular transition metal ion homeostasis	26	79	0.68	1.97e-06	237561.A0A1D8PFV0,237561.A0A1D8PFV2,237561.A0A1D8PGH6,237561.A0A1D8PH88,237561.A0A1D8PHV2,237561.A0A1D8PKY2,237561.A0A1D8PLJ3,237561.A0A1D8PME3,237561.A0A1D8PN52,237561.A0A1D8PN54,237561.A0A1D8PPC9,237561.A0A1D8PQB9,237561.A0A1D8PQI6,237561.A0A1D8PTF9,237561.G1UB63,237561.P87020,237561.Q59PA1,237561.Q59UT4,237561.Q59UY7,237561.Q59Z29,237561.Q59ZI1,237561.Q5A0X8,237561.Q5A2T6,237561.Q5A5R5,237561.…	FTR1,FTR2,CaO19.1534,ARH2,SMF12,FRP1,SOD1,CFL2,CFL5,CFL4,FET34,ALS4,FRP2,CaO19.6138,CSA1,PRA1,FRE10,RBT5,SEF1,AFT2,FRE9,CSA2,SIT1,ZSF1,HMX1,CCC2
GO:0055072	Iron ion homeostasis	24	65	0.73	1.97e-06	237561.A0A1D8PEK3,237561.A0A1D8PFV0,237561.A0A1D8PFV2,237561.A0A1D8PH88,237561.A0A1D8PKY2,237561.A0A1D8PLJ3,237561.A0A1D8PME3,237561.A0A1D8PN52,237561.A0A1D8PN54,237561.A0A1D8PPC9,237561.A0A1D8PQB9,237561.A0A1D8PQI6,237561.A0A1D8PTF9,237561.G1UB63,237561.Q59PA1,237561.Q59UT4,237561.Q59UY7,237561.Q59Z29,237561.Q59ZI1,237561.Q5A0X8,237561.Q5A2T6,237561.Q5A5R5,237561.Q5AB97,237561.Q5AG51	FTH1,FTR1,FTR2,ARH2,FRP1,SOD1,CFL2,CFL5,CFL4,FET34,ALS4,FRP2,CaO19.6138,CSA1,FRE10,RBT5,SEF1,AFT2,FRE9,CSA2,SIT1,ZSF1,HMX1,CCC2
GO:0006879	Cellular iron ion homeostasis	23	58	0.77	1.97e-06	237561.A0A1D8PFV0,237561.A0A1D8PFV2,237561.A0A1D8PH88,237561.A0A1D8PKY2,237561.A0A1D8PLJ3,237561.A0A1D8PME3,237561.A0A1D8PN52,237561.A0A1D8PN54,237561.A0A1D8PPC9,237561.A0A1D8PQB9,237561.A0A1D8PQI6,237561.A0A1D8PTF9,237561.G1UB63,237561.Q59PA1,237561.Q59UT4,237561.Q59UY7,237561.Q59Z29,237561.Q59ZI1,237561.Q5A0X8,237561.Q5A2T6,237561.Q5A5R5,237561.Q5AB97,237561.Q5AG51	FTR1,FTR2,ARH2,FRP1,SOD1,CFL2,CFL5,CFL4,FET34,ALS4,FRP2,CaO19.6138,CSA1,FRE10,RBT5,SEF1,AFT2,FRE9,CSA2,SIT1,ZSF1,HMX1,CCC2
GO:0030001	Metal ion transport	23	97	0.54	0.00036	237561.A0A1D8PEK3,237561.A0A1D8PFV0,237561.A0A1D8PFV2,237561.A0A1D8PGH6,237561.A0A1D8PGN5,237561.A0A1D8PHV2,237561.A0A1D8PKY2,237561.A0A1D8PME3,237561.A0A1D8PMR6,237561.A0A1D8PN52,237561.A0A1D8PN54,237561.A0A1D8PPC9,237561.A0A1D8PQB9,237561.A0A1D8PQI6,237561.A0A1D8PTF9,237561.Q59PA1,237561.Q59UT4,237561.Q59WB3,237561.Q59ZI1,237561.Q5A0X8,237561.Q5A2T6,237561.Q5A5B0,237561.Q5AG51	FTH1,FTR1,FTR2,CaO19.1534,ZRT2,SMF12,FRP1,CFL2,ZRT1,CFL5,CFL4,FET34,ALS4,FRP2,CaO19.6138,FRE10,RBT5,GAP4,FRE9,CSA2,SIT1,ENA21,CCC2
GO:0000041	Transition metal ion transport	22	57	0.75	1.97e-06	237561.A0A1D8PEK3,237561.A0A1D8PFV0,237561.A0A1D8PFV2,237561.A0A1D8PGH6,237561.A0A1D8PGN5,237561.A0A1D8PHV2,237561.A0A1D8PKY2,237561.A0A1D8PME3,237561.A0A1D8PMR6,237561.A0A1D8PN52,237561.A0A1D8PN54,237561.A0A1D8PPC9,237561.A0A1D8PQB9,237561.A0A1D8PQI6,237561.A0A1D8PTF9,237561.Q59PA1,237561.Q59UT4,237561.Q59WB3,237561.Q59ZI1,237561.Q5A0X8,237561.Q5A2T6,237561.Q5AG51	FTH1,FTR1,FTR2,CaO19.1534,ZRT2,SMF12,FRP1,CFL2,ZRT1,CFL5,CFL4,FET34,ALS4,FRP2,CaO19.6138,FRE10,RBT5,GAP4,FRE9,CSA2,SIT1,CCC2
GO:0051703	Intraspecies interaction between organisms	18	74	0.55	0.0031	237561.A0A1D8PQB9,237561.G1UB63,237561.O74254,237561.P43076,237561.P43094,237561.P46593,237561.Q59LY1,237561.Q59UT4,237561.Q59UT5,237561.Q5A0X8,237561.Q5A2V2,237561.Q5A8T4,237561.Q5ABE2,237561.Q5AC08,237561.Q5AHA0,237561.Q5AK51,237561.Q5AL36,237561.Q5ANJ4	ALS4,CSA1,GAM1,PHR1,SAP5,HWP1,BRG1,RBT5,PGA7,CSA2,RMD9,ALS1,HGC1,SAP6,CHK1,SFL2,TYE7,TEC1
GO:0006826	Iron ion transport	17	37	0.83	1.12e-05	237561.A0A1D8PEK3,237561.A0A1D8PFV0,237561.A0A1D8PFV2,237561.A0A1D8PHV2,237561.A0A1D8PKY2,237561.A0A1D8PME3,237561.A0A1D8PN52,237561.A0A1D8PN54,237561.A0A1D8PPC9,237561.A0A1D8PQB9,237561.A0A1D8PQI6,237561.A0A1D8PTF9,237561.Q59PA1,237561.Q59UT4,237561.Q59ZI1,237561.Q5A0X8,237561.Q5A2T6	FTH1,FTR1,FTR2,SMF12,FRP1,CFL2,CFL5,CFL4,FET34,ALS4,FRP2,CaO19.6138,FRE10,RBT5,FRE9,CSA2,SIT1
GO:0044010	Single-species biofilm formation	16	68	0.54	0.0113	237561.A0A1D8PQB9,237561.G1UB63,237561.O74254,237561.P43076,237561.P43094,237561.P46593,237561.Q59LY1,237561.Q59UT4,237561.Q59UT5,237561.Q5A0X8,237561.Q5A2V2,237561.Q5ABE2,237561.Q5AC08,237561.Q5AHA0,237561.Q5AL36,237561.Q5ANJ4	ALS4,CSA1,GAM1,PHR1,SAP5,HWP1,BRG1,RBT5,PGA7,CSA2,RMD9,HGC1,SAP6,CHK1,TYE7,TEC1
GO:0006825	Copper ion transport	9	24	0.74	0.0206	237561.A0A1D8PHV2,237561.A0A1D8PKY2,237561.A0A1D8PME3,237561.A0A1D8PN52,237561.A0A1D8PN54,237561.A0A1D8PQI6,237561.A0A1D8PTF9,237561.Q59PA1,237561.Q59ZI1	SMF12,FRP1,CFL2,CFL5,CFL4,FRP2,CaO19.6138,FRE10,FRE9
GO:0033212	Iron import into cell	8	14	0.92	0.0068	237561.A0A1D8PFV0,237561.A0A1D8PFV2,237561.A0A1D8PKY2,237561.A0A1D8PPC9,237561.A0A1D8PQB9,237561.A0A1D8PQI6,237561.Q59UT4,237561.Q5A2T6	FTR1,FTR2,FRP1,FET34,ALS4,FRP2,RBT5,SIT1
GO:0034755	Iron ion transmembrane transport	7	12	0.93	0.015	237561.A0A1D8PEK3,237561.A0A1D8PFV0,237561.A0A1D8PFV2,237561.A0A1D8PKY2,237561.A0A1D8PQI6,237561.Q5A0X8,237561.Q5A2T6	FTH1,FTR1,FTR2,FRP1,FRP2,CSA2,SIT1
GO:0033215	Reductive iron assimilation	6	11	0.9	0.0478	237561.A0A1D8PFV0,237561.A0A1D8PFV2,237561.A0A1D8PKY2,237561.A0A1D8PPC9,237561.A0A1D8PQB9,237561.A0A1D8PQI6	FTR1,FTR2,FRP1,FET34,ALS4,FRP2
GO:1901678	Iron coordination entity transport	5	6	1.09	0.0399	237561.A0A1D8PKY2,237561.A0A1D8PQI6,237561.Q59UT4,237561.Q5A0X8,237561.Q5A2T6	FRP1,FRP2,RBT5,CSA2,SIT1
GO:0016491	Oxidoreductase activity	67	446	0.34	7.03e-06	237561.A0A1D8PD74,237561.A0A1D8PD78,237561.A0A1D8PDP2,237561.A0A1D8PEG2,237561.A0A1D8PEH5,237561.A0A1D8PEM4,237561.A0A1D8PH64,237561.A0A1D8PH88,237561.A0A1D8PHQ6,237561.A0A1D8PHZ2,237561.A0A1D8PI17,237561.A0A1D8PI81,237561.A0A1D8PIM0,237561.A0A1D8PJC8,237561.A0A1D8PK06,237561.A0A1D8PKB7,237561.A0A1D8PKY2,237561.A0A1D8PL08,237561.A0A1D8PLJ3,237561.A0A1D8PLT2,237561.A0A1D8PME3,237561.A0A1D8PN39,237…	CaO19.4476,IFD6,PRN3,ZWF1,AOX2,AOX1,ADH3,ARH2,GRE2,CaO19.2202,RNR22,IFM3,IFR1,CaO19.1639,CaO19.5879,CaO19.7364,FRP1,CaO19.5655,SOD1,CaO19.1438,CFL2,CaO19.1961,CFL5,CFL4,FET34,GPX1,HPD1,SOD3,FRP2,AHP2,CaO19.1340,CaO19.2394,CaO19.541,CaO19.6138,CaO19.3711,CaO19.6398,CaO19.7306,SOU2,FRE10,CSH1,FDH1,CaO19.6869,MRF1,GPD2,GPX2,GPD1,PST2,CaO19.1366,CaO19.2244,FRE9,CaO19.3537,AMO1,DRE2,MAE1,PRN2,PRN4,HMX…
GO:0016616	Oxidoreductase activity, acting on the ch-oh group of donors, nad or nadp as acceptor	19	81	0.54	0.0093	237561.A0A1D8PD74,237561.A0A1D8PD78,237561.A0A1D8PEG2,237561.A0A1D8PH64,237561.A0A1D8PHQ6,237561.A0A1D8PI81,237561.A0A1D8PK06,237561.A0A1D8PQ07,237561.A0A1D8PRB0,237561.A0A1D8PTW9,237561.Q59QH2,237561.Q59QN6,237561.Q59W33,237561.Q59XU9,237561.Q59Z55,237561.Q5A4M2,237561.Q5ABT9,237561.Q5AC33,237561.Q5ADM5	CaO19.4476,IFD6,ZWF1,ADH3,GRE2,IFM3,CaO19.5879,HPD1,CaO19.1340,CaO19.7306,CSH1,FDH1,GPD2,GPD1,CaO19.2244,MAE1,CaO19.5611,CaO19.5517,CaO19.6816
GO:0016722	Oxidoreductase activity, oxidizing metal ions	9	24	0.74	0.03	237561.A0A1D8PKY2,237561.A0A1D8PME3,237561.A0A1D8PN52,237561.A0A1D8PN54,237561.A0A1D8PPC9,237561.A0A1D8PQI6,237561.A0A1D8PTF9,237561.Q59PA1,237561.Q59ZI1	FRP1,CFL2,CFL5,CFL4,FET34,FRP2,CaO19.6138,FRE10,FRE9
GO:0052851	Ferric-chelate reductase (nadph) activity	8	16	0.87	0.0255	237561.A0A1D8PKY2,237561.A0A1D8PME3,237561.A0A1D8PN52,237561.A0A1D8PN54,237561.A0A1D8PQI6,237561.A0A1D8PTF9,237561.Q59PA1,237561.Q59ZI1	FRP1,CFL2,CFL5,CFL4,FRP2,CaO19.6138,FRE10,FRE9
GO:0000293	Ferric-chelate reductase activity	8	17	0.84	0.0284	237561.A0A1D8PKY2,237561.A0A1D8PME3,237561.A0A1D8PN52,237561.A0A1D8PN54,237561.A0A1D8PQI6,237561.A0A1D8PTF9,237561.Q59PA1,237561.Q59ZI1	FRP1,CFL2,CFL5,CFL4,FRP2,CaO19.6138,FRE10,FRE9
GO:0071944	Cell periphery	86	737	0.23	0.00098	237561.A0A1D8PCL1,237561.A0A1D8PCT3,237561.A0A1D8PDP9,237561.A0A1D8PEI8,237561.A0A1D8PEK8,237561.A0A1D8PEU9,237561.A0A1D8PFV0,237561.A0A1D8PFV2,237561.A0A1D8PG82,237561.A0A1D8PGN5,237561.A0A1D8PHV2,237561.A0A1D8PJ22,237561.A0A1D8PJF0,237561.A0A1D8PJQ4,237561.A0A1D8PKH9,237561.A0A1D8PKY2,237561.A0A1D8PL94,237561.A0A1D8PLD6,237561.A0A1D8PLL2,237561.A0A1D8PLY7,237561.A0A1D8PME3,237561.A0A1D8PMR6,237…	HGT1,A0A1D8PCT3,PHO87,CaO19.4789,CaO19.4805,CaO19.4906,FTR1,FTR2,HGT8,ZRT2,SMF12,ATO1,CaO19.1632,CaO19.341,JEN1,FRP1,CaO19.4668,PDC12,SUL2,JEN2,CFL2,ZRT1,GIT4,CFL5,CFL4,FET34,CAN3,ALS4,FRP2,CDA2,SEO1,STE2,HGT16,CaO19.6138,HGT14,RTA4,CSA1,GAM1,PHR1,SAP5,HWP1,PRA1,FRE10,PIR32,FUS1,RBT5,PGA7,PRM1,GAP4,RIM9,DDR48,RAS1,PST2,FRE9,XUT1,SIT1,PGA13,SSU1,CaO19.3395,ENA21,PGA31,AGP3,IFF11,IHD1,ALS1,CaO19.62…
GO:0005886	Plasma membrane	65	506	0.28	0.00098	237561.A0A1D8PCL1,237561.A0A1D8PCT3,237561.A0A1D8PDP9,237561.A0A1D8PEI8,237561.A0A1D8PEU9,237561.A0A1D8PFV0,237561.A0A1D8PFV2,237561.A0A1D8PG82,237561.A0A1D8PGN5,237561.A0A1D8PHV2,237561.A0A1D8PJ22,237561.A0A1D8PJF0,237561.A0A1D8PJQ4,237561.A0A1D8PKH9,237561.A0A1D8PKY2,237561.A0A1D8PL94,237561.A0A1D8PLD6,237561.A0A1D8PLL2,237561.A0A1D8PLY7,237561.A0A1D8PME3,237561.A0A1D8PMR6,237561.A0A1D8PN14,237…	HGT1,A0A1D8PCT3,PHO87,CaO19.4789,CaO19.4906,FTR1,FTR2,HGT8,ZRT2,SMF12,ATO1,CaO19.1632,CaO19.341,JEN1,FRP1,CaO19.4668,PDC12,SUL2,JEN2,CFL2,ZRT1,GIT4,CFL5,CFL4,FET34,CAN3,ALS4,FRP2,STE2,HGT16,CaO19.6138,HGT14,RTA4,CSA1,PHR1,FRE10,FUS1,RBT5,PGA7,PRM1,GAP4,RIM9,RAS1,PST2,FRE9,XUT1,SIT1,SSU1,CaO19.3395,ENA21,AGP3,CaO19.6224,PNS1,MDR1,PGA11,CaO19.2038,PGA19,HGT6,CaO19.6805,DFI1,PGA17,CAG1,CaO19.4577,HG…
GO:0005576	Extracellular region	30	174	0.4	0.0035	237561.A0A1D8PER6,237561.A0A1D8PLD6,237561.A0A1D8PLJ3,237561.A0A1D8PQB9,237561.G1UB63,237561.O74254,237561.P43076,237561.P43094,237561.P46593,237561.P87020,237561.Q59PW0,237561.Q59UT4,237561.Q59UT5,237561.Q59X49,237561.Q5A0X8,237561.Q5A343,237561.Q5A3V6,237561.Q5A5U9,237561.Q5A7R7,237561.Q5A8I8,237561.Q5A8T4,237561.Q5AC08,237561.Q5AD07,237561.Q5AD08,237561.Q5AF03,237561.Q5AFI4,237561.Q5AH54,23756…	LIP1,PDC12,SOD1,ALS4,CSA1,GAM1,PHR1,SAP5,HWP1,PRA1,PIR32,RBT5,PGA7,DDR48,CSA2,PGA13,RIB3,PGA31,IFF11,IHD1,ALS1,SAP6,SOD5,CaO19.2059,GLX3,DFI1,CaO19.6484,SCW4,CRH12,CHT4
GO:0005618	Cell wall	25	139	0.42	0.0077	237561.A0A1D8PLD6,237561.A0A1D8PQB9,237561.A0A1D8PRN6,237561.G1UB63,237561.O74254,237561.P43076,237561.P43094,237561.P46593,237561.P87020,237561.Q59PW0,237561.Q59UT4,237561.Q59UT5,237561.Q59X49,237561.Q5A343,237561.Q5A5U9,237561.Q5A7R7,237561.Q5A8I8,237561.Q5A8T4,237561.Q5AC08,237561.Q5AD07,237561.Q5AF03,237561.Q5AFI4,237561.Q5AH54,237561.Q5AIB2,237561.Q5AK54	PDC12,ALS4,CDA2,CSA1,GAM1,PHR1,SAP5,HWP1,PRA1,PIR32,RBT5,PGA7,DDR48,PGA13,PGA31,IFF11,IHD1,ALS1,SAP6,SOD5,GLX3,DFI1,CaO19.6484,SCW4,CRH12
Figure 2F	GO: BP, MF, CC
#term ID	term description (Downregulation GO)	observed gene count	background gene count	strength	false discovery rate	matching proteins in your network (IDs)	matching proteins in your network (labels)
GO:0009987	Cellular process	332	4335	0.08	1.26e-09	237561.A0A1D8PCB9,237561.A0A1D8PCD7,237561.A0A1D8PCG7,237561.A0A1D8PCI6,237561.A0A1D8PCI9,237561.A0A1D8PCJ1,237561.A0A1D8PCM4,237561.A0A1D8PCQ5,237561.A0A1D8PCS7,237561.A0A1D8PCT4,237561.A0A1D8PCV7,237561.A0A1D8PCW6,237561.A0A1D8PD17,237561.A0A1D8PDL6,237561.A0A1D8PDT3,237561.A0A1D8PDT4,237561.A0A1D8PDU3,237561.A0A1D8PDU7,237561.A0A1D8PDU9,237561.A0A1D8PDY5,237561.A0A1D8PDZ1,237561.A0A1D8PE97,237…	ERG2,A0A1D8PCD7,RPS21B,RPS42,ABC1,MRP20,CaO19.3661,A0A1D8PCQ5,SNO1,FRS2,LYS2,RPS16A,CaO19.3048,A0A1D8PDL6,RPS14B,A0A1D8PDT4,RPS23A,HAK1,GLT1,CaO19.6219,A0A1D8PDZ1,GCV2,ARG5,6,RPL42,RPS17B,RPL2,RPL82,PHO84,RPL29,CDC54,A0A1D8PFI8,RPL4B,CaO19.7256,RPL38,ARO8,CaO19.2067,CHA1,ARO3,FEN12,RPS9B,THI20,RPL39,CaO19.810,CaO19.3560,A0A1D8PHH4,IDP1,VAS1,RPL11,CaO19.2214,GDH2,RPS10,TIM22,CaO19.2167,ASN1,ERG24,…
GO:0008152	Metabolic process	283	3234	0.14	2.82e-13	237561.A0A1D8PCB9,237561.A0A1D8PCD7,237561.A0A1D8PCG7,237561.A0A1D8PCI6,237561.A0A1D8PCI9,237561.A0A1D8PCJ1,237561.A0A1D8PCM2,237561.A0A1D8PCM4,237561.A0A1D8PCN0,237561.A0A1D8PCQ5,237561.A0A1D8PCS7,237561.A0A1D8PCT4,237561.A0A1D8PCV7,237561.A0A1D8PCW6,237561.A0A1D8PDA4,237561.A0A1D8PDC5,237561.A0A1D8PDL6,237561.A0A1D8PDT3,237561.A0A1D8PDT4,237561.A0A1D8PDU3,237561.A0A1D8PDU9,237561.A0A1D8PDZ1,237…	ERG2,A0A1D8PCD7,RPS21B,RPS42,ABC1,MRP20,GAL7,CaO19.3661,GAL10,A0A1D8PCQ5,SNO1,FRS2,LYS2,RPS16A,FMA1,IFE1,A0A1D8PDL6,RPS14B,A0A1D8PDT4,RPS23A,GLT1,A0A1D8PDZ1,GCV2,CaO19.4735,ARG5,6,RPL42,RPS17B,RPL2,RPL82,PHO84,RPL29,CDC54,RPL4B,CaO19.7256,RPL38,ARO8,CaO19.2067,CHA1,ARO3,FEN12,RPS9B,THI20,RPL39,CaO19.810,CaO19.3560,A0A1D8PHH4,IDP1,VAS1,RPL11,CaO19.2214,GDH2,RPS10,CaO19.2167,ASN1,ERG24,LEU42,ALI1,C…
GO:0006807	Nitrogen compound metabolic process	239	2460	0.18	2.11e-14	237561.A0A1D8PCD7,237561.A0A1D8PCG7,237561.A0A1D8PCI6,237561.A0A1D8PCI9,237561.A0A1D8PCJ1,237561.A0A1D8PCM4,237561.A0A1D8PCQ5,237561.A0A1D8PCS7,237561.A0A1D8PCT4,237561.A0A1D8PCV7,237561.A0A1D8PCW6,237561.A0A1D8PDL6,237561.A0A1D8PDT3,237561.A0A1D8PDT4,237561.A0A1D8PDU3,237561.A0A1D8PDU9,237561.A0A1D8PDZ1,237561.A0A1D8PE97,237561.A0A1D8PEI6,237561.A0A1D8PEV4,237561.A0A1D8PEY9,237561.A0A1D8PF08,237…	A0A1D8PCD7,RPS21B,RPS42,ABC1,MRP20,CaO19.3661,A0A1D8PCQ5,SNO1,FRS2,LYS2,RPS16A,A0A1D8PDL6,RPS14B,A0A1D8PDT4,RPS23A,GLT1,A0A1D8PDZ1,GCV2,ARG5,6,RPL42,RPS17B,RPL2,RPL82,RPL29,CDC54,RPL4B,CaO19.7256,RPL38,ARO8,CaO19.2067,CHA1,ARO3,FEN12,RPS9B,THI20,RPL39,CaO19.810,CaO19.3560,A0A1D8PHH4,IDP1,VAS1,RPL11,CaO19.2214,GDH2,RPS10,CaO19.2167,ASN1,LEU42,CaO19.1662,CaO19.1626,RPS15,RPL19A,RPL18,RPS19A,CAM1,A0…
GO:0009058	Biosynthetic process	208	1356	0.38	4.67e-36	237561.A0A1D8PCB9,237561.A0A1D8PCD7,237561.A0A1D8PCG7,237561.A0A1D8PCI6,237561.A0A1D8PCI9,237561.A0A1D8PCJ1,237561.A0A1D8PCQ5,237561.A0A1D8PCS7,237561.A0A1D8PCT4,237561.A0A1D8PCV7,237561.A0A1D8PCW6,237561.A0A1D8PDT3,237561.A0A1D8PDT4,237561.A0A1D8PDU3,237561.A0A1D8PDU9,237561.A0A1D8PDZ1,237561.A0A1D8PEI6,237561.A0A1D8PEV4,237561.A0A1D8PEY9,237561.A0A1D8PF08,237561.A0A1D8PF11,237561.A0A1D8PF57,237…	ERG2,A0A1D8PCD7,RPS21B,RPS42,ABC1,MRP20,A0A1D8PCQ5,SNO1,FRS2,LYS2,RPS16A,RPS14B,A0A1D8PDT4,RPS23A,GLT1,A0A1D8PDZ1,ARG5,6,RPL42,RPS17B,RPL2,RPL82,RPL29,CDC54,RPL4B,RPL38,ARO8,ARO3,FEN12,RPS9B,THI20,RPL39,CaO19.810,CaO19.3560,A0A1D8PHH4,IDP1,VAS1,RPL11,CaO19.2214,RPS10,ASN1,ERG24,LEU42,CaO19.1662,CaO19.1626,RPS15,RPL19A,RPL18,RPS19A,FAS2,CAM1,A0A1D8PKF3,LYS9,OPI3,HIS4,RPL40B,AAT22,ILV6,IDI1,EFB1,A0…
GO:0043170	Macromolecule metabolic process	176	2093	0.12	0.00053	237561.A0A1D8PCD7,237561.A0A1D8PCG7,237561.A0A1D8PCI6,237561.A0A1D8PCI9,237561.A0A1D8PCJ1,237561.A0A1D8PCM4,237561.A0A1D8PCQ5,237561.A0A1D8PCT4,237561.A0A1D8PCW6,237561.A0A1D8PDL6,237561.A0A1D8PDT3,237561.A0A1D8PDT4,237561.A0A1D8PDU3,237561.A0A1D8PDZ1,237561.A0A1D8PEV4,237561.A0A1D8PEY9,237561.A0A1D8PF08,237561.A0A1D8PF11,237561.A0A1D8PF57,237561.A0A1D8PFE6,237561.A0A1D8PFV1,237561.A0A1D8PFX4,237…	A0A1D8PCD7,RPS21B,RPS42,ABC1,MRP20,CaO19.3661,A0A1D8PCQ5,FRS2,RPS16A,A0A1D8PDL6,RPS14B,A0A1D8PDT4,RPS23A,A0A1D8PDZ1,RPL42,RPS17B,RPL2,RPL82,RPL29,CDC54,RPL4B,CaO19.7256,RPL38,CaO19.2067,RPS9B,RPL39,CaO19.810,CaO19.3560,A0A1D8PHH4,VAS1,RPL11,CaO19.2214,RPS10,CaO19.2167,CaO19.1662,CaO19.1626,RPS15,RPL19A,RPL18,RPS19A,CAM1,A0A1D8PKF3,CaO19.4161,RPL40B,CaO19.4657,RBT7,EFB1,A0A1D8PM41,RPL30,CaO19.5698…
GO:0010467	Gene expression	152	1098	0.34	6.6e-19	237561.A0A1D8PCD7,237561.A0A1D8PCG7,237561.A0A1D8PCI6,237561.A0A1D8PCJ1,237561.A0A1D8PCQ5,237561.A0A1D8PCT4,237561.A0A1D8PCW6,237561.A0A1D8PDL6,237561.A0A1D8PDT3,237561.A0A1D8PDT4,237561.A0A1D8PDU3,237561.A0A1D8PDZ1,237561.A0A1D8PEV4,237561.A0A1D8PEY9,237561.A0A1D8PF08,237561.A0A1D8PF11,237561.A0A1D8PF57,237561.A0A1D8PFV1,237561.A0A1D8PFX4,237561.A0A1D8PG16,237561.A0A1D8PG46,237561.A0A1D8PGY8,237…	A0A1D8PCD7,RPS21B,RPS42,MRP20,A0A1D8PCQ5,FRS2,RPS16A,A0A1D8PDL6,RPS14B,A0A1D8PDT4,RPS23A,A0A1D8PDZ1,RPL42,RPS17B,RPL2,RPL82,RPL29,RPL4B,CaO19.7256,RPL38,CaO19.2067,RPS9B,RPL39,CaO19.3560,A0A1D8PHH4,VAS1,RPL11,CaO19.2214,RPS10,CaO19.2167,CaO19.1662,CaO19.1626,RPS15,RPL19A,RPL18,RPS19A,CAM1,A0A1D8PKF3,RPL40B,EFB1,A0A1D8PM41,RPL30,CaO19.5698,CaO19.5684,THS1,A0A1D8PMX3,A0A1D8PN83,CAM1-1,A0A1D8PNP0,RP…
GO:0019538	Protein metabolic process	148	1158	0.3	2.76e-15	237561.A0A1D8PCD7,237561.A0A1D8PCG7,237561.A0A1D8PCI6,237561.A0A1D8PCI9,237561.A0A1D8PCJ1,237561.A0A1D8PCM4,237561.A0A1D8PCQ5,237561.A0A1D8PCT4,237561.A0A1D8PCW6,237561.A0A1D8PDT3,237561.A0A1D8PDT4,237561.A0A1D8PDU3,237561.A0A1D8PDZ1,237561.A0A1D8PEV4,237561.A0A1D8PEY9,237561.A0A1D8PF08,237561.A0A1D8PF11,237561.A0A1D8PF57,237561.A0A1D8PFV1,237561.A0A1D8PG16,237561.A0A1D8PG46,237561.A0A1D8PGY8,237…	A0A1D8PCD7,RPS21B,RPS42,ABC1,MRP20,CaO19.3661,A0A1D8PCQ5,FRS2,RPS16A,RPS14B,A0A1D8PDT4,RPS23A,A0A1D8PDZ1,RPL42,RPS17B,RPL2,RPL82,RPL29,RPL4B,RPL38,CaO19.2067,RPS9B,RPL39,CaO19.3560,A0A1D8PHH4,VAS1,RPL11,CaO19.2214,RPS10,CaO19.1662,CaO19.1626,RPS15,RPL19A,RPL18,RPS19A,CAM1,A0A1D8PKF3,CaO19.4161,RPL40B,CaO19.4657,EFB1,A0A1D8PM41,CaO19.5698,CaO19.5684,THS1,A0A1D8PMX3,A0A1D8PN83,CAM1-1,A0A1D8PNP0,RPS…
GO:0043603	Cellular amide metabolic process	140	414	0.73	4.89e-54	237561.A0A1D8PCD7,237561.A0A1D8PCG7,237561.A0A1D8PCI6,237561.A0A1D8PCJ1,237561.A0A1D8PCQ5,237561.A0A1D8PCT4,237561.A0A1D8PCW6,237561.A0A1D8PDT3,237561.A0A1D8PDT4,237561.A0A1D8PDU3,237561.A0A1D8PDZ1,237561.A0A1D8PEV4,237561.A0A1D8PEY9,237561.A0A1D8PF08,237561.A0A1D8PF11,237561.A0A1D8PF57,237561.A0A1D8PFV1,237561.A0A1D8PG16,237561.A0A1D8PGY8,237561.A0A1D8PH21,237561.A0A1D8PHE0,237561.A0A1D8PHH4,237…	A0A1D8PCD7,RPS21B,RPS42,MRP20,A0A1D8PCQ5,FRS2,RPS16A,RPS14B,A0A1D8PDT4,RPS23A,A0A1D8PDZ1,RPL42,RPS17B,RPL2,RPL82,RPL29,RPL4B,RPL38,RPS9B,RPL39,CaO19.3560,A0A1D8PHH4,VAS1,RPL11,CaO19.2214,RPS10,ASN1,CaO19.1662,RPS15,RPL19A,RPL18,RPS19A,CAM1,A0A1D8PKF3,RPL40B,AAT22,EFB1,A0A1D8PM41,CaO19.5698,CaO19.5684,THS1,A0A1D8PMX3,A0A1D8PN83,CAM1-1,A0A1D8PNP0,RPS25B,MSM1,RPL43A,RPS13,RPL32,TIF3,CaO19.688,RPL23A…
GO:0043604	Amide biosynthetic process	139	346	0.8	1.88e-60	237561.A0A1D8PCD7,237561.A0A1D8PCG7,237561.A0A1D8PCI6,237561.A0A1D8PCJ1,237561.A0A1D8PCQ5,237561.A0A1D8PCT4,237561.A0A1D8PCW6,237561.A0A1D8PDT3,237561.A0A1D8PDT4,237561.A0A1D8PDU3,237561.A0A1D8PDZ1,237561.A0A1D8PEV4,237561.A0A1D8PEY9,237561.A0A1D8PF08,237561.A0A1D8PF11,237561.A0A1D8PF57,237561.A0A1D8PFV1,237561.A0A1D8PG16,237561.A0A1D8PGY8,237561.A0A1D8PH21,237561.A0A1D8PHE0,237561.A0A1D8PHH4,237…	A0A1D8PCD7,RPS21B,RPS42,MRP20,A0A1D8PCQ5,FRS2,RPS16A,RPS14B,A0A1D8PDT4,RPS23A,A0A1D8PDZ1,RPL42,RPS17B,RPL2,RPL82,RPL29,RPL4B,RPL38,RPS9B,RPL39,CaO19.3560,A0A1D8PHH4,VAS1,RPL11,CaO19.2214,RPS10,ASN1,CaO19.1662,RPS15,RPL19A,RPL18,RPS19A,CAM1,A0A1D8PKF3,RPL40B,AAT22,EFB1,A0A1D8PM41,CaO19.5698,CaO19.5684,THS1,A0A1D8PMX3,A0A1D8PN83,CAM1-1,A0A1D8PNP0,RPS25B,MSM1,RPL43A,RPS13,RPL32,TIF3,CaO19.688,RPL23A…
GO:0006518	Peptide metabolic process	130	332	0.79	2e-55	237561.A0A1D8PCD7,237561.A0A1D8PCG7,237561.A0A1D8PCI6,237561.A0A1D8PCJ1,237561.A0A1D8PCQ5,237561.A0A1D8PCT4,237561.A0A1D8PCW6,237561.A0A1D8PDT3,237561.A0A1D8PDT4,237561.A0A1D8PDU3,237561.A0A1D8PDZ1,237561.A0A1D8PEV4,237561.A0A1D8PEY9,237561.A0A1D8PF08,237561.A0A1D8PF11,237561.A0A1D8PF57,237561.A0A1D8PFV1,237561.A0A1D8PG16,237561.A0A1D8PGY8,237561.A0A1D8PH21,237561.A0A1D8PHE0,237561.A0A1D8PHH4,237…	A0A1D8PCD7,RPS21B,RPS42,MRP20,A0A1D8PCQ5,FRS2,RPS16A,RPS14B,A0A1D8PDT4,RPS23A,A0A1D8PDZ1,RPL42,RPS17B,RPL2,RPL82,RPL29,RPL4B,RPL38,RPS9B,RPL39,CaO19.3560,A0A1D8PHH4,VAS1,RPL11,CaO19.2214,RPS10,CaO19.1662,RPS15,RPL19A,RPL18,RPS19A,CAM1,A0A1D8PKF3,RPL40B,EFB1,A0A1D8PM41,CaO19.5698,CaO19.5684,THS1,A0A1D8PMX3,A0A1D8PN83,CAM1-1,A0A1D8PNP0,RPS25B,MSM1,RPL43A,RPS13,RPL32,TIF3,CaO19.688,RPL23A,GUS1,RPS28…
GO:0006412	Translation	129	288	0.85	4.94e-60	237561.A0A1D8PCD7,237561.A0A1D8PCG7,237561.A0A1D8PCI6,237561.A0A1D8PCJ1,237561.A0A1D8PCQ5,237561.A0A1D8PCT4,237561.A0A1D8PCW6,237561.A0A1D8PDT3,237561.A0A1D8PDT4,237561.A0A1D8PDU3,237561.A0A1D8PDZ1,237561.A0A1D8PEV4,237561.A0A1D8PEY9,237561.A0A1D8PF08,237561.A0A1D8PF11,237561.A0A1D8PF57,237561.A0A1D8PFV1,237561.A0A1D8PG16,237561.A0A1D8PGY8,237561.A0A1D8PH21,237561.A0A1D8PHE0,237561.A0A1D8PHH4,237…	A0A1D8PCD7,RPS21B,RPS42,MRP20,A0A1D8PCQ5,FRS2,RPS16A,RPS14B,A0A1D8PDT4,RPS23A,A0A1D8PDZ1,RPL42,RPS17B,RPL2,RPL82,RPL29,RPL4B,RPL38,RPS9B,RPL39,CaO19.3560,A0A1D8PHH4,VAS1,RPL11,CaO19.2214,RPS10,CaO19.1662,RPS15,RPL19A,RPL18,RPS19A,CAM1,A0A1D8PKF3,RPL40B,EFB1,A0A1D8PM41,CaO19.5698,CaO19.5684,THS1,A0A1D8PMX3,A0A1D8PN83,CAM1-1,A0A1D8PNP0,RPS25B,MSM1,RPL43A,RPS13,RPL32,TIF3,CaO19.688,RPL23A,GUS1,RPS28…
GO:0044281	Small molecule metabolic process	90	653	0.34	1.02e-09	237561.A0A1D8PCB9,237561.A0A1D8PCI9,237561.A0A1D8PCM2,237561.A0A1D8PCN0,237561.A0A1D8PCS7,237561.A0A1D8PCT4,237561.A0A1D8PCV7,237561.A0A1D8PDU9,237561.A0A1D8PE97,237561.A0A1D8PEI6,237561.A0A1D8PF54,237561.A0A1D8PG20,237561.A0A1D8PGA8,237561.A0A1D8PGI8,237561.A0A1D8PGU2,237561.A0A1D8PH02,237561.A0A1D8PHH7,237561.A0A1D8PHR0,237561.A0A1D8PI00,237561.A0A1D8PIB2,237561.A0A1D8PIC7,237561.A0A1D8PIF8,237…	ERG2,ABC1,GAL7,GAL10,SNO1,FRS2,LYS2,GLT1,GCV2,ARG5,6,PHO84,ARO8,CHA1,ARO3,FEN12,THI20,IDP1,VAS1,GDH2,ASN1,ERG24,LEU42,FAS2,LYS9,HIS4,AAT22,ILV6,DAO2,TRP5,GDH3,THS1,PUT1,MSM1,ILV5,GCV1,GUS1,LEU1,ARG1,ACC1,CDC60,BIO2,ARC1,CaO19.2415,CaO19.2382,ACO2,ADE13,ARO2,ERG13,CaO19.7330,FDH3,ERG6,INO1,TIM54,ARO4,MET6,ACH1,SAH1,SER1,FEN1,IMH3,DED81,ARG4,MIS11,LYS22,GAL102,GAL1,FAD2,SER2,THI13,DFR1,LYS4,CaO19.5…
GO:0043436	Oxoacid metabolic process	67	396	0.43	3.56e-10	237561.A0A1D8PCS7,237561.A0A1D8PCT4,237561.A0A1D8PCV7,237561.A0A1D8PDU9,237561.A0A1D8PE97,237561.A0A1D8PEI6,237561.A0A1D8PF54,237561.A0A1D8PG20,237561.A0A1D8PGA8,237561.A0A1D8PGI8,237561.A0A1D8PGU2,237561.A0A1D8PHH7,237561.A0A1D8PHR0,237561.A0A1D8PI00,237561.A0A1D8PIB2,237561.A0A1D8PIF8,237561.A0A1D8PK65,237561.A0A1D8PKJ4,237561.A0A1D8PKY7,237561.A0A1D8PL85,237561.A0A1D8PLB7,237561.A0A1D8PLT7,237…	SNO1,FRS2,LYS2,GLT1,GCV2,ARG5,6,PHO84,ARO8,CHA1,ARO3,FEN12,IDP1,VAS1,GDH2,ASN1,LEU42,FAS2,LYS9,HIS4,AAT22,ILV6,DAO2,TRP5,GDH3,THS1,PUT1,MSM1,ILV5,GCV1,GUS1,LEU1,ARG1,ACC1,CDC60,BIO2,ARC1,CaO19.2415,CaO19.2382,ACO2,ARO2,FDH3,ARO4,MET6,ACH1,SER1,FEN1,DED81,ARG4,MIS11,LYS22,FAD2,SER2,DFR1,LYS4,CaO19.5455,CRC1,LYS12,LEU4,MSW1,ECM42,UGA11,HTS1,ILV3,PUT2,GCV3,MLS1,ACS2
GO:0019752	Carboxylic acid metabolic process	65	383	0.43	6.4e-10	237561.A0A1D8PCS7,237561.A0A1D8PCT4,237561.A0A1D8PCV7,237561.A0A1D8PDU9,237561.A0A1D8PE97,237561.A0A1D8PEI6,237561.A0A1D8PG20,237561.A0A1D8PGA8,237561.A0A1D8PGI8,237561.A0A1D8PGU2,237561.A0A1D8PHH7,237561.A0A1D8PHR0,237561.A0A1D8PI00,237561.A0A1D8PIB2,237561.A0A1D8PIF8,237561.A0A1D8PK65,237561.A0A1D8PKJ4,237561.A0A1D8PKY7,237561.A0A1D8PL85,237561.A0A1D8PLB7,237561.A0A1D8PLT7,237561.A0A1D8PMH6,237…	SNO1,FRS2,LYS2,GLT1,GCV2,ARG5,6,ARO8,CHA1,ARO3,FEN12,IDP1,VAS1,GDH2,ASN1,LEU42,FAS2,LYS9,HIS4,AAT22,ILV6,DAO2,TRP5,GDH3,THS1,PUT1,MSM1,ILV5,GCV1,GUS1,LEU1,ARG1,ACC1,CDC60,BIO2,ARC1,CaO19.2415,CaO19.2382,ACO2,ARO2,FDH3,ARO4,MET6,ACH1,SER1,FEN1,DED81,ARG4,MIS11,LYS22,FAD2,SER2,DFR1,LYS4,CRC1,LYS12,LEU4,MSW1,ECM42,UGA11,HTS1,ILV3,PUT2,GCV3,MLS1,ACS2
GO:0044283	Small molecule biosynthetic process	55	285	0.48	4.83e-10	237561.A0A1D8PCB9,237561.A0A1D8PCI9,237561.A0A1D8PCS7,237561.A0A1D8PCV7,237561.A0A1D8PDU9,237561.A0A1D8PEI6,237561.A0A1D8PG20,237561.A0A1D8PGI8,237561.A0A1D8PGU2,237561.A0A1D8PH02,237561.A0A1D8PHH7,237561.A0A1D8PIB2,237561.A0A1D8PIC7,237561.A0A1D8PIF8,237561.A0A1D8PK65,237561.A0A1D8PKJ4,237561.A0A1D8PKY7,237561.A0A1D8PL85,237561.A0A1D8PLB7,237561.A0A1D8PMH6,237561.A0A1D8PMH8,237561.A0A1D8PNH4,237…	ERG2,ABC1,SNO1,LYS2,GLT1,ARG5,6,ARO8,ARO3,FEN12,THI20,IDP1,ASN1,ERG24,LEU42,FAS2,LYS9,HIS4,AAT22,ILV6,TRP5,GDH3,PUT1,ILV5,LEU1,ARG1,ACC1,BIO2,ACO2,ARO2,ERG13,FDH3,ERG6,INO1,TIM54,ARO4,MET6,SER1,FEN1,IMH3,ARG4,MIS11,LYS22,FAD2,SER2,THI13,DFR1,LYS4,LYS12,LEU4,THI6,ECM42,SNZ1,ILV3,PUT2,THI4
GO:0002181	Cytoplasmic translation	48	85	0.95	1.36e-23	237561.A0A1D8PCQ5,237561.A0A1D8PDZ1,237561.A0A1D8PEY9,237561.A0A1D8PF08,237561.A0A1D8PF11,237561.A0A1D8PF57,237561.A0A1D8PFV1,237561.A0A1D8PG16,237561.A0A1D8PH21,237561.A0A1D8PHH4,237561.A0A1D8PI15,237561.A0A1D8PK22,237561.A0A1D8PK40,237561.A0A1D8PK43,237561.A0A1D8PK61,237561.A0A1D8PM41,237561.A0A1D8PN83,237561.A0A1D8PNQ6,237561.A0A1D8PPE0,237561.A0A1D8PPQ1,237561.A0A1D8PPT5,237561.A0A1D8PQQ5,237…	A0A1D8PCQ5,A0A1D8PDZ1,RPS17B,RPL2,RPL82,RPL29,RPL4B,RPL38,RPL39,A0A1D8PHH4,RPS10,RPS15,RPL19A,RPL18,RPS19A,A0A1D8PM41,A0A1D8PN83,RPS25B,RPS13,TIF3,RPL23A,RPS18,RPP0,RPP1B,SUI3,RPL28,RPS3,RPS27,RPP2A,RPS0,MTG2,RPS8A,TIF35,RPS20,SSZ1,RPL15A,RPS24,RPS12,RPL9B,RPS5,GCD11,RPL5,RPS7A,RPL12,RPS26A,NIP1,RPL8B,RPP2B
GO:0042254	Ribosome biogenesis	48	332	0.36	3.43e-05	237561.A0A1D8PCG7,237561.A0A1D8PCQ5,237561.A0A1D8PDL6,237561.A0A1D8PDZ1,237561.A0A1D8PEY9,237561.A0A1D8PF11,237561.A0A1D8PFX4,237561.A0A1D8PGY8,237561.A0A1D8PHH4,237561.A0A1D8PHW1,237561.A0A1D8PHY2,237561.A0A1D8PI15,237561.A0A1D8PI86,237561.A0A1D8PK22,237561.A0A1D8PK61,237561.A0A1D8PM75,237561.A0A1D8PN83,237561.A0A1D8PPE0,237561.A0A1D8PPR6,237561.A0A1D8PQN0,237561.A0A1D8PQQ5,237561.A0A1D8PQS0,237…	RPS21B,A0A1D8PCQ5,A0A1D8PDL6,A0A1D8PDZ1,RPS17B,RPL82,CaO19.7256,RPS9B,A0A1D8PHH4,RPL11,CaO19.2214,RPS10,CaO19.2167,RPS15,RPS19A,RPL30,A0A1D8PN83,RPS13,CaO19.688,RPS28B,RPS18,RPP0,CaO19.2594,RPS3,RPS27,A0A1D8PTL2,RPS0,RPL3,RPS8A,CaO19.2314,NOP7,RPF2,NOP1,UBI3,RPS20,SSZ1,CaO19.3797,RPS24,RPS21,ZUO1,RPS5,RPL5,RLI1,RPS7A,RPL12,RPS26A,RPL8B,RPL10A
GO:0034660	ncRNA metabolic process	43	379	0.25	0.016	237561.A0A1D8PCG7,237561.A0A1D8PCT4,237561.A0A1D8PDL6,237561.A0A1D8PF11,237561.A0A1D8PFX4,237561.A0A1D8PGY8,237561.A0A1D8PHR0,237561.A0A1D8PI86,237561.A0A1D8PM75,237561.A0A1D8PMV9,237561.A0A1D8PN83,237561.A0A1D8PP08,237561.A0A1D8PPE0,237561.A0A1D8PPR6,237561.A0A1D8PQL8,237561.A0A1D8PQQ5,237561.A0A1D8PS12,237561.A0A1D8PSC8,237561.A0A1D8PSE8,237561.A0A1D8PSG5,237561.A0A1D8PTI7,237561.Q59LS1,237561.…	RPS21B,FRS2,A0A1D8PDL6,RPL82,CaO19.7256,RPS9B,VAS1,CaO19.2167,RPL30,THS1,A0A1D8PN83,MSM1,RPS13,CaO19.688,GUS1,RPS18,CDC60,ARC1,CaO19.2415,CaO19.2382,RPS27,RPL3,DED81,RPS8A,TRM5,CaO19.2314,NOP7,RPF2,NOP1,UBI3,RPS20,SSZ1,MTO1,RPS24,RPS21,PPM2,ZUO1,MSW1,RLI1,RPS7A,HTS1,RPL8B,RPL10A
GO:0046394	Carboxylic acid biosynthetic process	40	179	0.55	1.04e-08	237561.A0A1D8PCV7,237561.A0A1D8PDU9,237561.A0A1D8PEI6,237561.A0A1D8PG20,237561.A0A1D8PGI8,237561.A0A1D8PGU2,237561.A0A1D8PHH7,237561.A0A1D8PIB2,237561.A0A1D8PIF8,237561.A0A1D8PK65,237561.A0A1D8PKJ4,237561.A0A1D8PKY7,237561.A0A1D8PL85,237561.A0A1D8PLB7,237561.A0A1D8PMH6,237561.A0A1D8PMH8,237561.A0A1D8PNH4,237561.A0A1D8PPG7,237561.A0A1D8PRP8,237561.A0A1D8PRR5,237561.A0A1D8PRR7,237561.A0A1D8PS33,237…	LYS2,GLT1,ARG5,6,ARO8,ARO3,FEN12,IDP1,ASN1,LEU42,FAS2,LYS9,HIS4,AAT22,ILV6,TRP5,GDH3,PUT1,ILV5,LEU1,ARG1,ACC1,BIO2,ACO2,ARO2,ARO4,MET6,SER1,FEN1,ARG4,MIS11,LYS22,FAD2,SER2,DFR1,LYS4,LYS12,LEU4,ECM42,ILV3,PUT2
GO:0140053	Mitochondrial gene expression	38	114	0.72	1.43e-12	237561.A0A1D8PCD7,237561.A0A1D8PCJ1,237561.A0A1D8PHE0,237561.A0A1D8PHY2,237561.A0A1D8PJB1,237561.A0A1D8PKF3,237561.A0A1D8PMT8,237561.A0A1D8PMU5,237561.A0A1D8PMX3,237561.A0A1D8PNP0,237561.A0A1D8PPR6,237561.A0A1D8PQR2,237561.A0A1D8PRP9,237561.A0A1D8PSE8,237561.A0A1D8PSG5,237561.A0A1D8PSW9,237561.A0A1D8PTL2,237561.A0A1D8PUC5,237561.Q59QC1,237561.Q59QT4,237561.Q59RQ4,237561.Q59TN1,237561.Q59X93,23756…	A0A1D8PCD7,MRP20,CaO19.3560,CaO19.2214,CaO19.1662,A0A1D8PKF3,CaO19.5698,CaO19.5684,A0A1D8PMX3,A0A1D8PNP0,CaO19.688,CaO19.7012,MRPL6,CaO19.2415,CaO19.2382,A0A1D8PSW9,A0A1D8PTL2,CaO19.7675,CaO19.397,CaO19.2639,MRPL8,TRM5,CaO19.585,CaO19.2275,MRPL51,CaO19.3797,CaO19.549,CaO19.498,MRPL40,MTO1,CaO19.5420,MEF2,MSW1,CaO19.863,CaO19.828,HTS1,MEF1,CaO19.1485
GO:1901605	Alpha-amino acid metabolic process	38	171	0.54	3.35e-08	237561.A0A1D8PCS7,237561.A0A1D8PCV7,237561.A0A1D8PDU9,237561.A0A1D8PE97,237561.A0A1D8PEI6,237561.A0A1D8PG20,237561.A0A1D8PGA8,237561.A0A1D8PHH7,237561.A0A1D8PI00,237561.A0A1D8PIB2,237561.A0A1D8PIF8,237561.A0A1D8PKJ4,237561.A0A1D8PKY7,237561.A0A1D8PL85,237561.A0A1D8PLB7,237561.A0A1D8PLT7,237561.A0A1D8PMH6,237561.A0A1D8PMH8,237561.A0A1D8PNH4,237561.A0A1D8PPG7,237561.A0A1D8PPW9,237561.A0A1D8PRP8,237…	SNO1,LYS2,GLT1,GCV2,ARG5,6,ARO8,CHA1,IDP1,GDH2,ASN1,LEU42,LYS9,HIS4,AAT22,ILV6,DAO2,TRP5,GDH3,PUT1,ILV5,GCV1,LEU1,ARG1,ACO2,MET6,SER1,ARG4,MIS11,LYS22,SER2,DFR1,LYS4,LYS12,LEU4,ECM42,ILV3,PUT2,GCV3
GO:0032543	Mitochondrial translation	36	100	0.75	1.13e-12	237561.A0A1D8PCD7,237561.A0A1D8PCJ1,237561.A0A1D8PHE0,237561.A0A1D8PHY2,237561.A0A1D8PJB1,237561.A0A1D8PKF3,237561.A0A1D8PMT8,237561.A0A1D8PMU5,237561.A0A1D8PMX3,237561.A0A1D8PNP0,237561.A0A1D8PPR6,237561.A0A1D8PQR2,237561.A0A1D8PRP9,237561.A0A1D8PSE8,237561.A0A1D8PSG5,237561.A0A1D8PSW9,237561.A0A1D8PTL2,237561.A0A1D8PUC5,237561.Q59QC1,237561.Q59QT4,237561.Q59RQ4,237561.Q59X93,237561.Q59Z25,23756…	A0A1D8PCD7,MRP20,CaO19.3560,CaO19.2214,CaO19.1662,A0A1D8PKF3,CaO19.5698,CaO19.5684,A0A1D8PMX3,A0A1D8PNP0,CaO19.688,CaO19.7012,MRPL6,CaO19.2415,CaO19.2382,A0A1D8PSW9,A0A1D8PTL2,CaO19.7675,CaO19.397,CaO19.2639,MRPL8,CaO19.585,CaO19.2275,MRPL51,CaO19.3797,CaO19.549,CaO19.498,MRPL40,CaO19.5420,MEF2,MSW1,CaO19.863,CaO19.828,HTS1,MEF1,CaO19.1485
GO:0008652	Cellular amino acid biosynthetic process	34	122	0.64	2.04e-09	237561.A0A1D8PCV7,237561.A0A1D8PDU9,237561.A0A1D8PEI6,237561.A0A1D8PG20,237561.A0A1D8PGI8,237561.A0A1D8PHH7,237561.A0A1D8PIB2,237561.A0A1D8PIF8,237561.A0A1D8PKJ4,237561.A0A1D8PKY7,237561.A0A1D8PL85,237561.A0A1D8PLB7,237561.A0A1D8PMH6,237561.A0A1D8PMH8,237561.A0A1D8PNH4,237561.A0A1D8PPG7,237561.A0A1D8PRP8,237561.A0A1D8PRR5,237561.A0A1D8PT27,237561.A0A1D8PTK1,237561.P79023,237561.P82610,237561.Q59P…	LYS2,GLT1,ARG5,6,ARO8,ARO3,IDP1,ASN1,LEU42,LYS9,HIS4,AAT22,ILV6,TRP5,GDH3,PUT1,ILV5,LEU1,ARG1,ACO2,ARO2,ARO4,MET6,SER1,ARG4,MIS11,LYS22,SER2,DFR1,LYS4,LYS12,LEU4,ECM42,ILV3,PUT2
GO:0006839	Mitochondrial transport	17	98	0.44	0.0207	237561.A0A1D8PI78,237561.A0A1D8PJV4,237561.A0A1D8PKI6,237561.A0A1D8PLH1,237561.A0A1D8PPR4,237561.A0A1D8PQX5,237561.O74261,237561.Q59RK9,237561.Q59SI2,237561.Q59W44,237561.Q59YG5,237561.Q5A7M2,237561.Q5A967,237561.Q5A9E1,237561.Q5AF54,237561.Q5AGX4,237561.Q5AH14	TIM22,CTP1,CaO19.7386,TIM10,YHM1,CaO19.6555,HSP60,OCT1,PAM18,TIM50,TIM23,TIM44,CRC1,MGE1,TIM13,CaO19.6565,TOM40
GO:0043648	Dicarboxylic acid metabolic process	12	39	0.69	0.0023	237561.A0A1D8PDU9,237561.A0A1D8PGI8,237561.A0A1D8PHH7,237561.A0A1D8PI00,237561.A0A1D8PL85,237561.A0A1D8PMH8,237561.A0A1D8PNH4,237561.A0A1D8PTK1,237561.P79023,237561.Q59SM8,237561.Q5A5E0,237561.Q5AK46	GLT1,ARO3,IDP1,GDH2,AAT22,GDH3,PUT1,ARO2,ARO4,MIS11,DFR1,PUT2
GO:0009067	Aspartate family amino acid biosynthetic process	11	51	0.53	0.0436	237561.A0A1D8PCV7,237561.A0A1D8PG20,237561.A0A1D8PIB2,237561.A0A1D8PKJ4,237561.A0A1D8PL85,237561.A0A1D8PT27,237561.P82610,237561.Q59SM8,237561.Q59TC4,237561.Q5A644,237561.Q5A9D9	LYS2,ARO8,ASN1,LYS9,AAT22,ACO2,MET6,MIS11,LYS22,LYS4,LYS12
GO:0045727	Positive regulation of translation	8	23	0.74	0.0175	237561.A0A1D8PGY8,237561.A0A1D8PKI6,237561.Q59YJ9,237561.Q5A2K4,237561.Q5A6Q6,237561.Q5A900,237561.Q5AGF6,237561.Q5AI20	RPS9B,CaO19.7386,GIS2,CaO19.2201,CaO19.498,RPS21,GCD11,RLI1
GO:0019878	Lysine biosynthetic process via aminoadipic acid	7	10	1.04	0.0021	237561.A0A1D8PCV7,237561.A0A1D8PG20,237561.A0A1D8PKJ4,237561.A0A1D8PT27,237561.Q59TC4,237561.Q5A644,237561.Q5A9D9	LYS2,ARO8,LYS9,ACO2,LYS22,LYS4,LYS12
GO:0006537	Glutamate biosynthetic process	5	5	1.2	0.0084	237561.A0A1D8PDU9,237561.A0A1D8PHH7,237561.A0A1D8PMH8,237561.A0A1D8PNH4,237561.Q5AK46	GLT1,IDP1,GDH3,PUT1,PUT2
GO:0009228	Thiamine biosynthetic process	4	4	1.2	0.0343	237561.A0A1D8PH02,237561.Q5A3Y5,237561.Q5AEJ1,237561.Q5ANB7	THI20,THI13,THI6,THI4
GO:1901363	Heterocyclic compound binding	143	1645	0.14	0.0037	237561.A0A1D8PCI6,237561.A0A1D8PCI9,237561.A0A1D8PCJ1,237561.A0A1D8PCQ5,237561.A0A1D8PCT4,237561.A0A1D8PDC7,237561.A0A1D8PDE8,237561.A0A1D8PDU9,237561.A0A1D8PDZ1,237561.A0A1D8PEI6,237561.A0A1D8PF08,237561.A0A1D8PF11,237561.A0A1D8PFE6,237561.A0A1D8PFV1,237561.A0A1D8PFX4,237561.A0A1D8PG16,237561.A0A1D8PG20,237561.A0A1D8PGA8,237561.A0A1D8PGY8,237561.A0A1D8PH21,237561.A0A1D8PH33,237561.A0A1D8PHH7,237…	RPS42,ABC1,MRP20,A0A1D8PCQ5,FRS2,CaO19.6853,YBN5,GLT1,A0A1D8PDZ1,ARG5,6,RPL2,RPL82,CDC54,RPL4B,CaO19.7256,RPL38,ARO8,CHA1,RPS9B,RPL39,CaO19.810,IDP1,VAS1,RPL11,CaO19.2214,RPS10,CaO19.2167,ASN1,RPS15,RPL19A,RPL18,CAM1,HIS4,AAT22,UME7,RBT7,DAO2,EFB1,A0A1D8PM41,RPL30,CaO19.5684,THS1,A0A1D8PN83,PUT1,CAM1-1,CaO19.1287,MSM1,PEX4,RPS13,ILV5,TIF3,CaO19.688,RPL23A,CaO19.7091,GUS1,CYB5,RPS18,RPP0,SSP96,CaO…
GO:0097159	Organic cyclic compound binding	143	1658	0.13	0.0041	237561.A0A1D8PCI6,237561.A0A1D8PCI9,237561.A0A1D8PCJ1,237561.A0A1D8PCQ5,237561.A0A1D8PCT4,237561.A0A1D8PDC7,237561.A0A1D8PDE8,237561.A0A1D8PDU9,237561.A0A1D8PDZ1,237561.A0A1D8PEI6,237561.A0A1D8PF08,237561.A0A1D8PF11,237561.A0A1D8PFE6,237561.A0A1D8PFV1,237561.A0A1D8PFX4,237561.A0A1D8PG16,237561.A0A1D8PG20,237561.A0A1D8PGA8,237561.A0A1D8PGY8,237561.A0A1D8PH21,237561.A0A1D8PH33,237561.A0A1D8PHH7,237…	RPS42,ABC1,MRP20,A0A1D8PCQ5,FRS2,CaO19.6853,YBN5,GLT1,A0A1D8PDZ1,ARG5,6,RPL2,RPL82,CDC54,RPL4B,CaO19.7256,RPL38,ARO8,CHA1,RPS9B,RPL39,CaO19.810,IDP1,VAS1,RPL11,CaO19.2214,RPS10,CaO19.2167,ASN1,RPS15,RPL19A,RPL18,CAM1,HIS4,AAT22,UME7,RBT7,DAO2,EFB1,A0A1D8PM41,RPL30,CaO19.5684,THS1,A0A1D8PN83,PUT1,CAM1-1,CaO19.1287,MSM1,PEX4,RPS13,ILV5,TIF3,CaO19.688,RPL23A,CaO19.7091,GUS1,CYB5,RPS18,RPP0,SSP96,CaO…
GO:0003735	Structural constituent of ribosome	98	158	0.99	1.21e-53	237561.A0A1D8PCD7,237561.A0A1D8PCG7,237561.A0A1D8PCI6,237561.A0A1D8PCJ1,237561.A0A1D8PCQ5,237561.A0A1D8PCW6,237561.A0A1D8PDL6,237561.A0A1D8PDT3,237561.A0A1D8PDT4,237561.A0A1D8PDU3,237561.A0A1D8PDZ1,237561.A0A1D8PEV4,237561.A0A1D8PEY9,237561.A0A1D8PF08,237561.A0A1D8PF11,237561.A0A1D8PF57,237561.A0A1D8PFV1,237561.A0A1D8PG16,237561.A0A1D8PGY8,237561.A0A1D8PH21,237561.A0A1D8PHE0,237561.A0A1D8PHH4,237…	A0A1D8PCD7,RPS21B,RPS42,MRP20,A0A1D8PCQ5,RPS16A,A0A1D8PDL6,RPS14B,A0A1D8PDT4,RPS23A,A0A1D8PDZ1,RPL42,RPS17B,RPL2,RPL82,RPL29,RPL4B,RPL38,RPS9B,RPL39,CaO19.3560,A0A1D8PHH4,RPL11,CaO19.2214,RPS10,CaO19.1662,RPS15,RPL19A,RPL18,RPS19A,A0A1D8PKF3,RPL40B,A0A1D8PM41,RPL30,CaO19.5698,CaO19.5684,A0A1D8PMX3,A0A1D8PN83,A0A1D8PNP0,RPS25B,RPL43A,RPS13,RPL32,CaO19.688,RPL23A,RPS28B,RPS18,CaO19.7012,RPP0,RPP1B,…
GO:0003676	Nucleic acid binding	93	963	0.18	0.0041	237561.A0A1D8PCI6,237561.A0A1D8PCJ1,237561.A0A1D8PCQ5,237561.A0A1D8PCT4,237561.A0A1D8PDC7,237561.A0A1D8PDZ1,237561.A0A1D8PF08,237561.A0A1D8PF11,237561.A0A1D8PFE6,237561.A0A1D8PFV1,237561.A0A1D8PFX4,237561.A0A1D8PG16,237561.A0A1D8PGY8,237561.A0A1D8PH21,237561.A0A1D8PH33,237561.A0A1D8PHW1,237561.A0A1D8PHY2,237561.A0A1D8PI15,237561.A0A1D8PI86,237561.A0A1D8PK22,237561.A0A1D8PK40,237561.A0A1D8PK43,237…	RPS42,MRP20,A0A1D8PCQ5,FRS2,CaO19.6853,A0A1D8PDZ1,RPL2,RPL82,CDC54,RPL4B,CaO19.7256,RPL38,RPS9B,RPL39,CaO19.810,RPL11,CaO19.2214,RPS10,CaO19.2167,RPS15,RPL19A,RPL18,CAM1,UME7,RBT7,EFB1,A0A1D8PM41,RPL30,CaO19.5684,A0A1D8PN83,CAM1-1,CaO19.1287,RPS13,ILV5,TIF3,CaO19.688,RPL23A,GUS1,RPS18,RPP0,CaO19.5128,SUI3,MRPL6,MCM6,RPL28,ARC1,CaO19.2415,CaO19.2382,CaO19.496,RPS3,A0A1D8PTL2,CaO19.3492,CaO19.7328,…
GO:0003723	RNA binding	76	493	0.39	1.96e-09	237561.A0A1D8PCI6,237561.A0A1D8PCJ1,237561.A0A1D8PCQ5,237561.A0A1D8PCT4,237561.A0A1D8PDZ1,237561.A0A1D8PF08,237561.A0A1D8PF11,237561.A0A1D8PFV1,237561.A0A1D8PFX4,237561.A0A1D8PG16,237561.A0A1D8PGY8,237561.A0A1D8PH21,237561.A0A1D8PHW1,237561.A0A1D8PHY2,237561.A0A1D8PI15,237561.A0A1D8PI86,237561.A0A1D8PK22,237561.A0A1D8PK40,237561.A0A1D8PK43,237561.A0A1D8PKC3,237561.A0A1D8PLR0,237561.A0A1D8PM35,237…	RPS42,MRP20,A0A1D8PCQ5,FRS2,A0A1D8PDZ1,RPL2,RPL82,RPL4B,CaO19.7256,RPL38,RPS9B,RPL39,RPL11,CaO19.2214,RPS10,CaO19.2167,RPS15,RPL19A,RPL18,CAM1,RBT7,EFB1,A0A1D8PM41,RPL30,CaO19.5684,A0A1D8PN83,CAM1-1,RPS13,TIF3,CaO19.688,RPL23A,GUS1,RPS18,RPP0,CaO19.5128,SUI3,MRPL6,RPL28,ARC1,CaO19.2415,CaO19.2382,RPS3,A0A1D8PTL2,CaO19.7328,RPL13,MRPS9,CEF3,TEF2,GIS2,RPF2,TIF35,EFT2,NOP1,RPS20,DFR1,RPS4A,CaO19.498…
GO:0019843	rRNA binding	20	48	0.82	3.92e-07	237561.A0A1D8PCI6,237561.A0A1D8PF08,237561.A0A1D8PGY8,237561.A0A1D8PHW1,237561.A0A1D8PMU5,237561.A0A1D8PN83,237561.A0A1D8PPE0,237561.A0A1D8PPR6,237561.A0A1D8PPT5,237561.A0A1D8PQQ5,237561.A0A1D8PQS0,237561.A0A1D8PRP9,237561.Q59ZG6,237561.Q5A5Q8,237561.Q5A6Q6,237561.Q5A900,237561.Q5AEN2,237561.Q5AG43,237561.Q5AGZ7,237561.Q5AJF7	RPS42,RPL2,RPS9B,RPL11,CaO19.5684,A0A1D8PN83,RPS13,CaO19.688,RPL23A,RPS18,RPP0,MRPL6,RPF2,RPS4A,CaO19.498,RPS21,RPL9B,RPS5,RPL5,RPL12
GO:0045182	Translation regulator activity	15	57	0.62	0.0037	237561.A0A1D8PKC3,237561.A0A1D8PM35,237561.A0A1D8PNN8,237561.A0A1D8PPQ1,237561.A0A1D8PRJ6,237561.P25997,237561.Q59QD6,237561.Q59YJ9,237561.Q59ZV5,237561.Q5A0M4,237561.Q5ABC3,237561.Q5AGF6,237561.Q5AI20,237561.Q5AL45,237561.Q5AML1	CAM1,EFB1,CAM1-1,TIF3,SUI3,CEF3,TEF2,GIS2,TIF35,EFT2,TUF1,GCD11,RLI1,MEF1,NIP1
GO:0004812	aminoacyl-tRNA ligase activity	11	36	0.68	0.0082	237561.A0A1D8PCT4,237561.A0A1D8PHR0,237561.A0A1D8PMV9,237561.A0A1D8PP08,237561.A0A1D8PQL8,237561.A0A1D8PS12,237561.A0A1D8PSE8,237561.A0A1D8PSG5,237561.Q59R18,237561.Q5AG80,237561.Q5AJX0	FRS2,VAS1,THS1,MSM1,GUS1,CDC60,CaO19.2415,CaO19.2382,DED81,MSW1,HTS1
GO:0016638	Oxidoreductase activity, acting on the ch-nh2 group of donors	6	11	0.93	0.0295	237561.A0A1D8PDU9,237561.A0A1D8PE97,237561.A0A1D8PEE6,237561.A0A1D8PI00,237561.A0A1D8PLT7,237561.A0A1D8PMH8	GLT1,GCV2,CaO19.4735,GDH2,DAO2,GDH3
GO:0110165	Cellular anatomical entity	350	4780	0.06	1.06e-08	237561.A0A1D8PCB9,237561.A0A1D8PCD7,237561.A0A1D8PCG7,237561.A0A1D8PCI6,237561.A0A1D8PCI9,237561.A0A1D8PCJ1,237561.A0A1D8PCM2,237561.A0A1D8PCM4,237561.A0A1D8PCN0,237561.A0A1D8PCQ5,237561.A0A1D8PCS7,237561.A0A1D8PCT4,237561.A0A1D8PCV7,237561.A0A1D8PCW6,237561.A0A1D8PD17,237561.A0A1D8PDA4,237561.A0A1D8PDC5,237561.A0A1D8PDC7,237561.A0A1D8PDE8,237561.A0A1D8PDL6,237561.A0A1D8PDT3,237561.A0A1D8PDT4,237…	ERG2,A0A1D8PCD7,RPS21B,RPS42,ABC1,MRP20,GAL7,CaO19.3661,GAL10,A0A1D8PCQ5,SNO1,FRS2,LYS2,RPS16A,CaO19.3048,FMA1,IFE1,CaO19.6853,YBN5,A0A1D8PDL6,RPS14B,A0A1D8PDT4,RPS23A,HAK1,GLT1,CaO19.6219,A0A1D8PDZ1,GCV2,CaO19.4735,ARG5,6,RPL42,RPS17B,RPL2,RPL82,PHO84,RPL29,CDC54,A0A1D8PFI8,RPL4B,CaO19.7256,RPL38,ARO8,CaO19.2067,CHA1,ARO3,FEN12,RPS9B,RPL39,CaO19.810,CaO19.3560,A0A1D8PHH4,IDP1,VAS1,RPL11,CaO19.22…
GO:0005622	Intracellular	319	4353	0.06	1.84e-05	237561.A0A1D8PCB9,237561.A0A1D8PCD7,237561.A0A1D8PCG7,237561.A0A1D8PCI6,237561.A0A1D8PCI9,237561.A0A1D8PCJ1,237561.A0A1D8PCM2,237561.A0A1D8PCM4,237561.A0A1D8PCN0,237561.A0A1D8PCQ5,237561.A0A1D8PCS7,237561.A0A1D8PCT4,237561.A0A1D8PCV7,237561.A0A1D8PCW6,237561.A0A1D8PD17,237561.A0A1D8PDA4,237561.A0A1D8PDC5,237561.A0A1D8PDC7,237561.A0A1D8PDE8,237561.A0A1D8PDL6,237561.A0A1D8PDT3,237561.A0A1D8PDT4,237…	ERG2,A0A1D8PCD7,RPS21B,RPS42,ABC1,MRP20,GAL7,CaO19.3661,GAL10,A0A1D8PCQ5,SNO1,FRS2,LYS2,RPS16A,CaO19.3048,FMA1,IFE1,CaO19.6853,YBN5,A0A1D8PDL6,RPS14B,A0A1D8PDT4,RPS23A,GLT1,CaO19.6219,A0A1D8PDZ1,GCV2,CaO19.4735,ARG5,6,RPL42,RPS17B,RPL2,RPL82,PHO84,RPL29,CDC54,A0A1D8PFI8,RPL4B,CaO19.7256,RPL38,ARO8,CaO19.2067,CHA1,ARO3,FEN12,RPS9B,RPL39,CaO19.810,CaO19.3560,A0A1D8PHH4,IDP1,VAS1,RPL11,CaO19.2214,GD…
GO:0005737	Cytoplasm	292	3436	0.13	9.36e-13	237561.A0A1D8PCB9,237561.A0A1D8PCD7,237561.A0A1D8PCG7,237561.A0A1D8PCI6,237561.A0A1D8PCI9,237561.A0A1D8PCJ1,237561.A0A1D8PCM2,237561.A0A1D8PCM4,237561.A0A1D8PCN0,237561.A0A1D8PCQ5,237561.A0A1D8PCS7,237561.A0A1D8PCT4,237561.A0A1D8PCV7,237561.A0A1D8PDA4,237561.A0A1D8PDC5,237561.A0A1D8PDE8,237561.A0A1D8PDL6,237561.A0A1D8PDU9,237561.A0A1D8PDY5,237561.A0A1D8PDZ1,237561.A0A1D8PE97,237561.A0A1D8PEE6,237…	ERG2,A0A1D8PCD7,RPS21B,RPS42,ABC1,MRP20,GAL7,CaO19.3661,GAL10,A0A1D8PCQ5,SNO1,FRS2,LYS2,FMA1,IFE1,YBN5,A0A1D8PDL6,GLT1,CaO19.6219,A0A1D8PDZ1,GCV2,CaO19.4735,ARG5,6,RPS17B,RPL2,RPL82,PHO84,RPL29,CDC54,A0A1D8PFI8,RPL4B,RPL38,ARO8,CaO19.2067,CHA1,ARO3,FEN12,RPS9B,RPL39,CaO19.810,CaO19.3560,A0A1D8PHH4,IDP1,VAS1,RPL11,CaO19.2214,GDH2,RPS10,TIM22,ASN1,ERG24,LEU42,ALI1,A0A1D8PJ94,CaO19.1662,CaO19.1626,C…
GO:0043226	Organelle	278	3777	0.06	0.0014	237561.A0A1D8PCB9,237561.A0A1D8PCD7,237561.A0A1D8PCG7,237561.A0A1D8PCI6,237561.A0A1D8PCI9,237561.A0A1D8PCJ1,237561.A0A1D8PCM4,237561.A0A1D8PCQ5,237561.A0A1D8PCW6,237561.A0A1D8PD17,237561.A0A1D8PDC7,237561.A0A1D8PDL6,237561.A0A1D8PDT3,237561.A0A1D8PDT4,237561.A0A1D8PDU3,237561.A0A1D8PDU9,237561.A0A1D8PDY5,237561.A0A1D8PDZ1,237561.A0A1D8PE97,237561.A0A1D8PEI6,237561.A0A1D8PEV4,237561.A0A1D8PEY9,237…	ERG2,A0A1D8PCD7,RPS21B,RPS42,ABC1,MRP20,CaO19.3661,A0A1D8PCQ5,RPS16A,CaO19.3048,CaO19.6853,A0A1D8PDL6,RPS14B,A0A1D8PDT4,RPS23A,GLT1,CaO19.6219,A0A1D8PDZ1,GCV2,ARG5,6,RPL42,RPS17B,RPL2,RPL82,PHO84,RPL29,CDC54,A0A1D8PFI8,RPL4B,CaO19.7256,RPL38,CaO19.2067,CHA1,ARO3,FEN12,RPS9B,RPL39,CaO19.810,CaO19.3560,A0A1D8PHH4,IDP1,VAS1,RPL11,CaO19.2214,GDH2,RPS10,TIM22,CaO19.2167,ERG24,LEU42,ALI1,A0A1D8PJ94,CaO…
GO:0032991	Protein-containing complex	149	1642	0.16	4.01e-05	237561.A0A1D8PCD7,237561.A0A1D8PCI6,237561.A0A1D8PCJ1,237561.A0A1D8PCQ5,237561.A0A1D8PCS7,237561.A0A1D8PCT4,237561.A0A1D8PDL6,237561.A0A1D8PDU3,237561.A0A1D8PDZ1,237561.A0A1D8PE97,237561.A0A1D8PEY9,237561.A0A1D8PF08,237561.A0A1D8PF11,237561.A0A1D8PF57,237561.A0A1D8PFE6,237561.A0A1D8PFV1,237561.A0A1D8PFX4,237561.A0A1D8PG16,237561.A0A1D8PGY8,237561.A0A1D8PH21,237561.A0A1D8PHE0,237561.A0A1D8PHH4,237…	A0A1D8PCD7,RPS42,MRP20,A0A1D8PCQ5,SNO1,FRS2,A0A1D8PDL6,RPS23A,A0A1D8PDZ1,GCV2,RPS17B,RPL2,RPL82,RPL29,CDC54,RPL4B,CaO19.7256,RPL38,RPS9B,RPL39,CaO19.3560,A0A1D8PHH4,RPL11,CaO19.2214,RPS10,TIM22,CaO19.1662,RPS15,RPL19A,RPL18,RPS19A,FAS2,A0A1D8PKF3,CaO19.4161,CaO19.4657,ILV6,TIM10,QCR9,EFB1,A0A1D8PM41,RPL30,CaO19.5698,CaO19.5684,A0A1D8PMX3,A0A1D8PN83,A0A1D8PNP0,RPS25B,RPL43A,RPS13,FET99,RPL32,TIF3,…
GO:0043232	Intracellular non-membrane-bounded organelle	130	1047	0.29	2.19e-12	237561.A0A1D8PCD7,237561.A0A1D8PCG7,237561.A0A1D8PCI6,237561.A0A1D8PCJ1,237561.A0A1D8PCQ5,237561.A0A1D8PCW6,237561.A0A1D8PDL6,237561.A0A1D8PDT3,237561.A0A1D8PDT4,237561.A0A1D8PDU3,237561.A0A1D8PDZ1,237561.A0A1D8PEV4,237561.A0A1D8PEY9,237561.A0A1D8PF08,237561.A0A1D8PF11,237561.A0A1D8PF57,237561.A0A1D8PFE6,237561.A0A1D8PFV1,237561.A0A1D8PFX4,237561.A0A1D8PG16,237561.A0A1D8PGA8,237561.A0A1D8PGY8,237…	A0A1D8PCD7,RPS21B,RPS42,MRP20,A0A1D8PCQ5,RPS16A,A0A1D8PDL6,RPS14B,A0A1D8PDT4,RPS23A,A0A1D8PDZ1,RPL42,RPS17B,RPL2,RPL82,RPL29,CDC54,RPL4B,CaO19.7256,RPL38,CHA1,RPS9B,RPL39,CaO19.810,CaO19.3560,A0A1D8PHH4,IDP1,RPL11,CaO19.2214,RPS10,CaO19.2167,CaO19.1662,RPS15,RPL19A,RPL18,RPS19A,A0A1D8PKF3,CaO19.4161,RPL40B,CaO19.4657,ILV6,A0A1D8PM41,RPL30,CaO19.5698,CaO19.5684,A0A1D8PMX3,A0A1D8PN83,A0A1D8PNP0,RPS…
GO:0005739	Mitochondrion	122	895	0.33	4.87e-14	237561.A0A1D8PCD7,237561.A0A1D8PCI9,237561.A0A1D8PCJ1,237561.A0A1D8PCM4,237561.A0A1D8PDU9,237561.A0A1D8PE97,237561.A0A1D8PEI6,237561.A0A1D8PG46,237561.A0A1D8PGA8,237561.A0A1D8PGI8,237561.A0A1D8PHE0,237561.A0A1D8PHH7,237561.A0A1D8PHR0,237561.A0A1D8PHY2,237561.A0A1D8PI00,237561.A0A1D8PI78,237561.A0A1D8PIF8,237561.A0A1D8PJ73,237561.A0A1D8PJ94,237561.A0A1D8PJB1,237561.A0A1D8PJV4,237561.A0A1D8PK65,237…	A0A1D8PCD7,ABC1,MRP20,CaO19.3661,GLT1,GCV2,ARG5,6,CaO19.2067,CHA1,ARO3,CaO19.3560,IDP1,VAS1,CaO19.2214,GDH2,TIM22,LEU42,ALI1,A0A1D8PJ94,CaO19.1662,CTP1,FAS2,A0A1D8PKF3,CaO19.7386,OPI3,CaO19.4657,ILV6,TIM10,QCR9,CaO19.5698,CaO19.5688,CaO19.5684,THS1,A0A1D8PMX3,PUT1,A0A1D8PNP0,MSM1,COX15,ILV5,YHM1,CaO19.688,GCV1,GUS1,RPS18,CaO19.7012,CaO19.6555,MRPL6,ACC1,BIO2,CaO19.2415,CaO19.2382,CaO19.496,A0A1D8…
GO:1990904	Ribonucleoprotein complex	111	412	0.63	1.74e-33	237561.A0A1D8PCD7,237561.A0A1D8PCI6,237561.A0A1D8PCJ1,237561.A0A1D8PCQ5,237561.A0A1D8PDL6,237561.A0A1D8PDU3,237561.A0A1D8PDZ1,237561.A0A1D8PEY9,237561.A0A1D8PF08,237561.A0A1D8PF11,237561.A0A1D8PF57,237561.A0A1D8PFV1,237561.A0A1D8PFX4,237561.A0A1D8PG16,237561.A0A1D8PGY8,237561.A0A1D8PH21,237561.A0A1D8PHE0,237561.A0A1D8PHH4,237561.A0A1D8PHW1,237561.A0A1D8PHY2,237561.A0A1D8PI15,237561.A0A1D8PJB1,237…	A0A1D8PCD7,RPS42,MRP20,A0A1D8PCQ5,A0A1D8PDL6,RPS23A,A0A1D8PDZ1,RPS17B,RPL2,RPL82,RPL29,RPL4B,CaO19.7256,RPL38,RPS9B,RPL39,CaO19.3560,A0A1D8PHH4,RPL11,CaO19.2214,RPS10,CaO19.1662,RPS15,RPL19A,RPL18,RPS19A,A0A1D8PKF3,A0A1D8PM41,RPL30,CaO19.5698,CaO19.5684,A0A1D8PMX3,A0A1D8PN83,A0A1D8PNP0,RPS25B,RPL43A,RPS13,RPL32,TIF3,CaO19.688,RPL23A,RPS28B,RPS18,CaO19.7012,RPP0,CaO19.5128,RPP1B,SUI3,MRPL6,RPL28,R…
GO:0005840	Ribosome	103	185	0.94	1.63e-53	237561.A0A1D8PCD7,237561.A0A1D8PCG7,237561.A0A1D8PCI6,237561.A0A1D8PCJ1,237561.A0A1D8PCQ5,237561.A0A1D8PCW6,237561.A0A1D8PDL6,237561.A0A1D8PDT3,237561.A0A1D8PDT4,237561.A0A1D8PDU3,237561.A0A1D8PDZ1,237561.A0A1D8PEV4,237561.A0A1D8PEY9,237561.A0A1D8PF08,237561.A0A1D8PF11,237561.A0A1D8PF57,237561.A0A1D8PFV1,237561.A0A1D8PG16,237561.A0A1D8PGY8,237561.A0A1D8PH21,237561.A0A1D8PHE0,237561.A0A1D8PHH4,237…	A0A1D8PCD7,RPS21B,RPS42,MRP20,A0A1D8PCQ5,RPS16A,A0A1D8PDL6,RPS14B,A0A1D8PDT4,RPS23A,A0A1D8PDZ1,RPL42,RPS17B,RPL2,RPL82,RPL29,RPL4B,RPL38,RPS9B,RPL39,CaO19.3560,A0A1D8PHH4,RPL11,CaO19.2214,RPS10,CaO19.1662,RPS15,RPL19A,RPL18,RPS19A,A0A1D8PKF3,RPL40B,A0A1D8PM41,RPL30,CaO19.5698,CaO19.5684,A0A1D8PMX3,A0A1D8PN83,A0A1D8PNP0,RPS25B,RPL43A,RPS13,RPL32,CaO19.688,RPL23A,RPS28B,RPS18,CaO19.7012,RPP0,RPP1B,…
GO:0005829	Cytosol	90	648	0.34	2.62e-10	237561.A0A1D8PCI6,237561.A0A1D8PCN0,237561.A0A1D8PCQ5,237561.A0A1D8PCS7,237561.A0A1D8PDL6,237561.A0A1D8PDZ1,237561.A0A1D8PEY9,237561.A0A1D8PF08,237561.A0A1D8PF11,237561.A0A1D8PF57,237561.A0A1D8PFV1,237561.A0A1D8PG16,237561.A0A1D8PGY8,237561.A0A1D8PH21,237561.A0A1D8PHH4,237561.A0A1D8PHW1,237561.A0A1D8PHY2,237561.A0A1D8PI15,237561.A0A1D8PK22,237561.A0A1D8PK40,237561.A0A1D8PK43,237561.A0A1D8PK61,237…	RPS42,GAL10,A0A1D8PCQ5,SNO1,A0A1D8PDL6,A0A1D8PDZ1,RPS17B,RPL2,RPL82,RPL29,RPL4B,RPL38,RPS9B,RPL39,A0A1D8PHH4,RPL11,CaO19.2214,RPS10,RPS15,RPL19A,RPL18,RPS19A,FAS2,AAT22,IDI1,A0A1D8PM41,RPL30,GDH3,CaO19.3139,A0A1D8PN83,RPS25B,RPL43A,RPS13,RPL32,RPL23A,RPS28B,RPS18,RPP0,RPP1B,LEU1,ARG1,RPL28,CaO19.4370,RPS3,CaO19.714,RPS27,ARO2,RPP2A,CaO19.7328,CaO19.7330,RPS0,RPL13,RPS22B,ACO1,ASC1,SAH1,RPL3,ARG4,…
GO:0005759	Mitochondrial matrix	56	200	0.64	2.31e-16	237561.A0A1D8PCD7,237561.A0A1D8PCI9,237561.A0A1D8PCJ1,237561.A0A1D8PEI6,237561.A0A1D8PG46,237561.A0A1D8PGA8,237561.A0A1D8PHE0,237561.A0A1D8PHH7,237561.A0A1D8PHY2,237561.A0A1D8PJB1,237561.A0A1D8PKF3,237561.A0A1D8PLB7,237561.A0A1D8PMT8,237561.A0A1D8PMU5,237561.A0A1D8PMX3,237561.A0A1D8PNH4,237561.A0A1D8PNP0,237561.A0A1D8PP08,237561.A0A1D8PPG7,237561.A0A1D8PPR6,237561.A0A1D8PQR2,237561.A0A1D8PRP9,237…	A0A1D8PCD7,ABC1,MRP20,ARG5,6,CaO19.2067,CHA1,CaO19.3560,IDP1,CaO19.2214,CaO19.1662,A0A1D8PKF3,ILV6,CaO19.5698,CaO19.5684,A0A1D8PMX3,PUT1,A0A1D8PNP0,MSM1,ILV5,CaO19.688,CaO19.7012,MRPL6,CaO19.2415,CaO19.2382,A0A1D8PSW9,A0A1D8PTL2,CaO19.7675,HSP60,MRPS9,SSC1,CaO19.397,CaO19.2639,OCT1,MRPL8,PAM18,TRM5,CaO19.585,CaO19.2275,CaO19.2201,MRPL51,CaO19.3797,CaO19.549,CaO19.498,MRPL40,TIM44,MZM1,CaO19.5420,…
GO:0005844	Polysome	7	21	0.72	0.0322	237561.A0A1D8PPQ1,237561.A0A1D8PRA6,237561.Q59TU0,237561.Q59YJ9,237561.Q5A678,237561.Q5AF98,237561.Q5AMT7	TIF3,CaO19.5128,EGD1,GIS2,SSZ1,ZUO1,BFR1
Figure 2G
#term ID	term description	observed gene count	background gene count	strength	false discovery rate	matching proteins in your network (IDs)	matching proteins in your network (labels)
CL:7688	Mixed, incl. metal ion transport, and carboxylic acid transport	31	171	0.43	0.00069	237561.A0A1D8PD86,237561.A0A1D8PDP9,237561.A0A1D8PEK3,237561.A0A1D8PEK8,237561.A0A1D8PF19,237561.A0A1D8PFN3,237561.A0A1D8PFV0,237561.A0A1D8PFV2,237561.A0A1D8PGH6,237561.A0A1D8PGN5,237561.A0A1D8PHV2,237561.A0A1D8PKB7,237561.A0A1D8PKY2,237561.A0A1D8PLJ3,237561.A0A1D8PLY7,237561.A0A1D8PM73,237561.A0A1D8PMR6,237561.A0A1D8PPC9,237561.P87020,237561.Q59UY7,237561.Q59WB3,237561.Q59Z29,237561.Q5A2T6,23756…	CaO19.1062,PHO87,FTH1,CaO19.4805,HAP43,CaO19.4981,FTR1,FTR2,CaO19.1534,ZRT2,SMF12,CaO19.7364,FRP1,SOD1,JEN2,CSR1,ZRT1,FET34,PRA1,SEF1,GAP4,AFT2,SIT1,SSU1,ENA21,ZSF1,AGP3,BUL1,HMX1,CCC2,PUT4
Figure 2H
#term ID	term description	observed gene count	background gene count	strength	false discovery rate	matching proteins in your network (IDs)	matching proteins in your network (labels)
GO:0009405	Pathogenesis	33	222	0.34	0.0113	237561.A0A1D8PME3,237561.A0A1D8PN14,237561.A0A1D8PQB9,237561.G1UB63,237561.P43076,237561.P43094,237561.P46593,237561.P87020,237561.Q59LY1,237561.Q59MD2,237561.Q59UT5,237561.Q59UY7,237561.Q59YS7,237561.Q59Z29,237561.Q5A0X8,237561.Q5A343,237561.Q5A3Z6,237561.Q5A5U9,237561.Q5A7R7,237561.Q5A8I8,237561.Q5ABE2,237561.Q5ABU7,237561.Q5AC08,237561.Q5AD07,237561.Q5AD34,237561.Q5AFI4,237561.Q5AH54,237561.Q5…	CFL2,GIT4,ALS4,CSA1,PHR1,SAP5,HWP1,PRA1,BRG1,UME6,PGA7,SEF1,MNN14,AFT2,CSA2,PGA13,SSU1,PGA31,IFF11,IHD1,HGC1,MDR1,SAP6,SOD5,PGA19,DFI1,CaO19.6484,CHK1,PGA17,SFL2,CRH12,TYE7,TEC1
Figure 2I
#term ID	term description	observed gene count	background gene count	strength	false discovery rate	matching proteins in your network (IDs)	matching proteins in your network (labels)
CL:2361	Cytosolic ribosome, and eukaryotic 43s preinitiation complex	74	110	1.03	4.32e-41	237561.A0A1D8PCG7,237561.A0A1D8PCI6,237561.A0A1D8PCW6,237561.A0A1D8PDT3,237561.A0A1D8PDT4,237561.A0A1D8PDU3,237561.A0A1D8PDZ1,237561.A0A1D8PEV4,237561.A0A1D8PEY9,237561.A0A1D8PF08,237561.A0A1D8PF11,237561.A0A1D8PF57,237561.A0A1D8PFV1,237561.A0A1D8PG16,237561.A0A1D8PGY8,237561.A0A1D8PH21,237561.A0A1D8PHH4,237561.A0A1D8PHW1,237561.A0A1D8PI15,237561.A0A1D8PJD2,237561.A0A1D8PK22,237561.A0A1D8PK40,237…	RPS21B,RPS42,RPS16A,RPS14B,A0A1D8PDT4,RPS23A,A0A1D8PDZ1,RPL42,RPS17B,RPL2,RPL82,RPL29,RPL4B,RPL38,RPS9B,RPL39,A0A1D8PHH4,RPL11,RPS10,CaO19.1626,RPS15,RPL19A,RPL18,RPS19A,CAM1,EFB1,A0A1D8PM41,RPL30,A0A1D8PN83,RPS25B,RPL43A,RPS13,RPL32,RPL23A,RPS28B,RPS18,RPP0,RPP1B,RPL28,RPS27,A0A1D8PTR4,RPP2A,RPS0,RPL13,RPS22B,CEF3,ASC1,RPL3,RPS8A,RPL17B,EGD1,TIF35,EFT2,RPS20,SSB1,RPS4A,SSZ1,RPL15A,RPS24,RPS21,RP…
Figure 2J
#term ID	term description	observed gene count	background gene count	strength	false discovery rate	matching proteins in your network (IDs)	matching proteins in your network (labels)
CL:2942	Mitochondrial gene expression, and trna aminoacylation for protein translation	56	157	0.75	2.78e-20	237561.A0A1D8PCD7,237561.A0A1D8PCJ1,237561.A0A1D8PCQ5,237561.A0A1D8PCT4,237561.A0A1D8PDE8,237561.A0A1D8PHE0,237561.A0A1D8PHR0,237561.A0A1D8PHY2,237561.A0A1D8PJB1,237561.A0A1D8PKF3,237561.A0A1D8PMT8,237561.A0A1D8PMU5,237561.A0A1D8PMV9,237561.A0A1D8PMX3,237561.A0A1D8PNP0,237561.A0A1D8PP08,237561.A0A1D8PPR6,237561.A0A1D8PQL8,237561.A0A1D8PQR2,237561.A0A1D8PRP9,237561.A0A1D8PS12,237561.A0A1D8PSC8,237…	A0A1D8PCD7,MRP20,A0A1D8PCQ5,FRS2,YBN5,CaO19.3560,VAS1,CaO19.2214,CaO19.1662,A0A1D8PKF3,CaO19.5698,CaO19.5684,THS1,A0A1D8PMX3,A0A1D8PNP0,MSM1,CaO19.688,GUS1,CaO19.7012,MRPL6,CDC60,ARC1,CaO19.2415,CaO19.2382,A0A1D8PSW9,A0A1D8PTL2,CaO19.7675,MRPS9,AIM11,SER1,MTG2,CaO19.397,CaO19.2639,DED81,MRPL8,CaO19.585,CaO19.2275,ATP23,MRPL51,CaO19.3797,CaO19.549,CaO19.498,MRPL40,MTO1,CaO19.5420,MEF2,TUF1,MSW1,RP…
