# Supplementary material for: A chemically induced attenuated strain of Candida albicans generates robust protective immune responses and prevents systemic candidiasis development
Source: eLife journal article supplement (doi:10.7554/elife.93760), 2024-02-07
Supplement: fig3-data1 [file Figure B, C and D.xlsx]

## Sheet: Figure 3 B,C and D
	Mean Fluoresence intensity	Ca			CAET
	Mannan (ConA)	57.531	61.577	69.934	157.547	157.847	160.271
	β-glucan (Aniline Blue)	68.958	45.596	59.135	87.915	78.715	99.67
	Chitin (CFW)	768.915	799.023	727.35	878.555	855.16	861.192

## Sheet: Figure 3 E
FlowCell Text Data File: Ca_200µL24Jun23.csv							FlowCell Text Data File: CAET_200µL24Jun23.csv							FlowCell Text Data File: Ca (2)_400µL24Jun23.csv							FlowCell Text Data File: CAET(2)_400µL24Jun23.csv
Data Columns:							Data Columns:							Data Columns:							Data Columns:
Sample	Source	Position(mm)	Absorbance	Fraction Number	Fraction Volume(ml)		Sample	Source	Position(mm)	Absorbance	Fraction Number	Fraction Volume(ml)		Sample	Source	Position(mm)	Absorbance	Fraction Number	Fraction Volume(ml)		Sample	Source	Position(mm)	Absorbance	Fraction Number	Fraction Volume(ml)
538882	478641	0	0.626633	0	0.123		538367	473033	0	0.602262	0	0.123		530647	476701	0	0.652149	0	0.123		533289	475681	0	0.636152	0	0.122
537675	478651	0	0.631726				538297	472991	0	0.602355				528297	476785	0	0.662534				532571	475644	0	0.639009
526381	478137	0.06	0.677083				524861	472627	0.06	0.657506				519721	476686	0.06	0.698898				517091	475756	0.06	0.70592
283930	478124	0.16	2.06621				516929	471959	0.16	0.688593				502895	476591	0.16	0.772513				513661	475921	0.16	0.721678
499391	478774	0.26	0.798533				507706	472378	0.26	0.731104				509098	476913	0.26	0.746445				500865	475929	0.26	0.778488
477071	478368	0.36	0.899523				480534	472138	0.36	0.853745				492246	477118	0.36	0.823166				368168	475627	0.36	1.46974
347257	478605	0.46	1.61538				357545	472421	0.46	1.52041				418527	477320	0.46	1.18922				503032	475893	0.46	0.768602
397902	478546	0.56	1.30872				315592	472023	0.57	1.79939				266614	477106	0.56	2.20302				265138	475592	0.56	2.20836
516262	478125	0.66	0.720709				461190	472635	0.67	0.948578				436544	477122	0.66	1.09344				459146	475177	0.66	0.970646
497836	477930	0.76	0.80158				304511	473078	0.77	1.88485				475378	476738	0.76	0.899842				413736	474885	0.76	1.20362
291166	477893	0.86	2.00849				391486	472960	0.87	1.31888				493433	476717	0.86	0.815854				372473	475087	0.86	1.44102
496207	478084	0.96	0.809681				481324	472529	0.97	0.851911				460932	476796	0.96	0.969563				501354	475368	0.96	0.773637
515252	478758	1.06	0.728094				420521	472443	1.07	1.15541				506100	476809	1.06	0.759246				323710	475030	1.06	1.75652
295339	478440	1.16	1.97904				388316	472786	1.17	1.33635				393622	477209	1.16	1.32676				511305	475112	1.16	0.728195
511443	478298	1.26	0.742629				481448	472774	1.27	0.852498				374470	477053	1.26	1.43828				350890	475298	1.26	1.57635
513374	478163	1.36	0.733513				496123	472709	1.37	0.784618				445431	477358	1.36	1.0492				510627	475582	1.36	0.733407
404097	478656	1.46	1.27447				502720	472492	1.47	0.753857				389514	477364	1.46	1.35111				304537	475416	1.46	1.89575
405552	478253	1.56	1.26449				508522	472622	1.57	0.728653				477672	477251	1.56	0.891428				441983	475705	1.56	1.05888
77481	478134	1.66	4.98889				500005	472777	1.67	0.767401				494361	477512	1.66	0.815375				505976	475554	1.66	0.753866
31594	478137	1.76	7.00769				508254	472709	1.77	0.730253				230835	477349	1.76	2.52846				253018	475399	1.76	2.31275
31525	477871	1.86	7.01136				531338	472361	1.87	0.628638				11540	477379	1.87	9.27064				506249	475035	1.86	0.750195
31994	478107	1.96	6.97923				333938	472583	1.97	1.67489				12648	476827	1.96	9.06172				316676	475062	1.96	1.80611
32806	477837	2.06	6.92156				404699	472634	2.07	1.24263				12415	476953	2.06	9.10415				403106	475282	2.06	1.26408
33399	477939	2.16	6.88173				305815	472389	2.17	1.87195				12818	476942	2.17	9.03221				434905	475066	2.16	1.09218
33401	478080	2.26	6.88225				35167	471802	2.27	6.73656				13491	477144	2.27	8.91801				390944	475348	2.26	1.33333
33245	477674	2.36	6.89088				35797	472358	2.37	6.69925				14218	477136	2.36	8.79985				261758	474929	2.36	2.2341
33185	478123	2.46	6.89706				35898	472390	2.47	6.69306				14362	476993	2.46	8.7765				14039	474741	2.46	8.81704
33127	478101	2.56	6.90089				35924	472253	2.57	6.69078				13849	476840	2.56	8.85763				14115	474934	2.56	8.8058
33088	477697	2.66	6.90164				35885	472032	2.67	6.69217				12986	477209	2.67	9.00417				14254	474983	2.66	8.78398
32862	477803	2.76	6.91756				35840	472203	2.77	6.69581				12380	476902	2.76	9.11027				14273	475021	2.76	8.78116
32247	477741	2.87	6.95979				35737	472199	2.87	6.70227				12386	476834	2.86	9.10886				14288	474800	2.86	8.77775
31163	477685	2.96	7.03647				35518	472177	2.97	6.716				12730	476644	2.96	9.04631				14171	475075	2.96	8.79756
29669	477580	3.06	7.14654				35386	472042	3.07	6.72373				11407	476543	3.07	9.29278				13979	474847	3.06	8.82718
28822	477432	3.17	7.21102				35266	471978	3.17	6.73107				10177	476790	3.17	9.55072				13790	474792	3.16	8.85755
27889	477760	3.27	7.28662				35014	472172	3.27	6.74814				9424	476667	3.27	9.72313				13581	474810	3.26	8.89201
25943	477559	3.37	7.44845				34758	472216	3.37	6.76486				8890	476758	3.37	9.85483				13409	474658	3.36	8.91997
24366	477261	3.46	7.58818				34456	471893	3.47	6.78296				8457	476814	3.47	9.96747				13245	474411	3.46	8.94649
23428	477509	3.56	7.67769				34258	471438	3.57	6.79376				7948	476682	3.57	10.1065				13035	474961	3.56	8.98507
22682	477610	3.66	7.75099				34044	471542	3.67	6.80835				7503	476600	3.67	10.2358				12820	474784	3.66	9.02166
22240	477598	3.76	7.79522				33730	471782	3.77	6.83035				7040	476668	3.77	10.3795				12536	474981	3.76	9.073
21979	477625	3.86	7.82191				33422	471670	3.87	6.85046				6616	477242	3.87	10.522				12286	474732	3.86	9.11716
21819	477079	3.96	7.83578				33057	471906	3.97	6.8763				6293	476907	3.97	10.633				11930	474817	3.96	9.18373
21717	477101	4.06	7.84643				32704	472232	4.07	6.90201				6074	476902	4.07	10.7127				11649	474668	4.07	9.23667
21845	477505	4.17	7.83511				32363	471723	4.17	6.92318				5938	476462	4.17	10.7616				11359	474777	4.17	9.29392
22109	477840	4.27	7.80966				32139	471511	4.27	6.93779				5853	476471	4.27	10.7941				11125	474859	4.27	9.34115
22504	477580	4.37	7.76858				32025	472049	4.37	6.94836				5810	476501	4.37	10.8108				10914	474353	4.37	9.38184
23060	477274	4.47	7.71221				31890	471562	4.47	6.95554				5809	476615	4.47	10.8118				10739	474798	4.47	9.42033
23766	477408	4.57	7.64498				32015	472376	4.57	6.95062				5835	476649	4.57	10.8019				10629	474793	4.57	9.44348
24664	477392	4.67	7.56144				32055	471652	4.67	6.94436				5918	476670	4.67	10.7702				10570	474766	4.67	9.45587
25675	477292	4.77	7.47056				32320	471741	4.77	6.92625				6042	476863	4.77	10.7244				10552	474506	4.77	9.45848
26911	477185	4.87	7.36425				32685	471305	4.87	6.8989				6244	477355	4.87	10.6527				10627	474491	4.87	9.44247
28302	477670	4.97	7.25312				33290	471410	4.97	6.85813				6458	476499	4.97	10.5729				10754	474679	4.97	9.41662
29939	477776	5.07	7.12707				34129	471699	5.07	6.80349				6760	476473	5.07	10.4699				10943	474233	5.07	9.3753
31677	477282	5.17	6.99776				34972	472136	5.17	6.75066				7116	476386	5.17	10.354				11178	474419	5.17	9.32837
33791	477670	5.27	6.8542				36167	472171	5.27	6.67522				7559	476219	5.27	10.2173				11492	474711	5.27	9.26741
36074	478021	5.37	6.70872				37391	471890	5.38	6.59898				8076	476142	5.37	10.068				11855	474517	5.37	9.1965
38734	477875	5.47	6.54793				38868	472050	5.48	6.51255				8716	476560	5.47	9.89838				12295	474448	5.47	9.11416
41667	477294	5.57	6.38093				40490	472300	5.58	6.42174				9458	476591	5.57	9.71466				12797	474542	5.57	9.02455
45038	477091	5.67	6.20489				42340	472112	5.68	6.3203				10362	476654	5.67	9.50953				13402	474521	5.67	8.9205
48633	477154	5.77	6.03237				44297	472057	5.78	6.21835				11369	476448	5.77	9.29984				14070	474490	5.77	8.81089
52697	476927	5.87	5.85068				46502	472081	5.88	6.10915				12546	476662	5.87	9.07916				14817	474192	5.87	8.69305
57267	477343	5.97	5.66549				49054	472014	5.98	5.98859				13935	476556	5.97	8.84236				15702	474217	5.97	8.56262
62407	477405	6.07	5.47235				51711	472189	6.08	5.87072				15512	476763	6.07	8.60207				16672	474237	6.07	8.42782
67383	477330	6.17	5.29935				54671	472200	6.18	5.74551				17324	476997	6.17	8.35454				17768	474310	6.17	8.28488
73275	477480	6.27	5.11141				57859	472269	6.28	5.61829				19376	476971	6.27	8.1025				19011	474325	6.27	8.13278
79311	477129	6.37	4.93162				61335	472045	6.38	5.48593				21704	477123	6.37	7.84788				20340	474162	6.37	7.97994
86013	477263	6.47	4.74969				65158	472157	6.48	5.35039				24332	476984	6.47	7.59001				21880	474198	6.47	7.81587
93594	477575	6.57	4.56107	1	0.929		69353	472377	6.58	5.21103	1	0.929		27398	476965	6.57	7.32285	1	0.929		23597	474502	6.57	7.6473	1	0.929
100986	477520	6.67	4.38974				73464	472324	6.68	5.08118				30551	476760	6.68	7.07674				25330	474233	6.67	7.48653
109032	477288	6.77	4.21613				78126	471890	6.78	4.94065				34114	476969	6.78	6.82948				27376	474467	6.77	7.31284
117496	477523	6.87	4.04899				83084	472197	6.88	4.80364				37912	476808	6.88	6.59117				29517	474146	6.87	7.14186
126667	476770	6.97	3.8763				88614	472234	6.98	4.65881				42210	476941	6.98	6.35012				31974	473978	6.97	6.96112
135942	476638	7.07	3.71665				94023	471952	7.08	4.52412				46648	476928	7.08	6.12508				34557	474312	7.07	6.78788
144831	476822	7.17	3.57498				99419	471787	7.18	4.39776				51525	476802	7.18	5.90071				37186	474117	7.17	6.62195
153694	477310	7.27	3.44361				105363	471773	7.28	4.26701				57709	476889	7.28	5.64604				40326	474241	7.27	6.4401
163455	476970	7.37	3.30344				111896	471821	7.38	4.13186				64936	477465	7.38	5.38323				43703	474347	7.37	6.25963
172813	477510	7.47	3.1807				118497	471701	7.48	4.00229				72760	477366	7.48	5.12674				47548	474902	7.47	6.07249
182489	477155	7.57	3.05642				125200	472001	7.58	3.87989				81614	476874	7.58	4.866				51515	474715	7.58	5.89127
193648	477516	7.68	2.92456				132496	472244	7.68	3.75359				91374	476886	7.68	4.61184				55850	474680	7.68	5.70928
205250	477375	7.78	2.79295				139494	472428	7.78	3.63864				101066	477053	7.78	4.38576				60065	474610	7.78	5.54521
217153	477724	7.88	2.66773				147486	472337	7.88	3.51283				111544	477055	7.88	4.16377				64485	474294	7.88	5.38392
229541	477343	7.98	2.54108				155884	472221	7.98	3.38765				122834	476699	7.98	3.94512				69627	474430	7.98	5.21191
241858	477316	8.08	2.42332				163933	471519	8.08	3.271				134012	476663	8.08	3.74895				74622	474705	8.08	5.0573
253152	477131	8.18	2.31974				172603	472175	8.19	3.15815				145417	476933	8.18	3.56641				79623	474645	8.18	4.91103
264518	476831	8.28	2.21949				181618	472317	8.29	3.04426				157420	476596	8.28	3.38634				85046	474792	8.28	4.76345
276507	477361	8.38	2.12223				190084	472239	8.39	2.94135				169634	476481	8.38	3.21763				90806	474980	8.38	4.61686
288363	476884	8.48	2.0255				199742	471773	8.49	2.8276				182984	476675	8.48	3.04806				96788	474691	8.48	4.47192
299541	476652	8.58	1.93882				209154	471804	8.59	2.72413				196054	477200	8.58	2.89528				102844	474491	8.58	4.33439
310833	476767	8.68	1.85609				218665	472203	8.69	2.62595				208860	477059	8.68	2.75222				109216	474886	8.68	4.20098
321776	476733	8.78	1.77806				227985	472207	8.79	2.53204				221844	476945	8.78	2.61596				115854	474873	8.78	4.06814
333145	476905	8.88	1.70073				238670	472256	8.89	2.4292				235935	476841	8.88	2.47688				123142	474643	8.88	3.92976
344101	476781	8.98	1.62733				248243	472434	8.99	2.34154				249259	477092	8.98	2.35443				130242	474385	8.98	3.80238
355107	477277	9.08	1.55882				257598	472252	9.09	2.25743				261455	476965	9.08	2.24633				137422	474461	9.08	3.68198
363910	476882	9.18	1.50185				267543	472673	9.19	2.17419				273627	477001	9.18	2.1441				144832	474342	9.18	3.56323
373910	477061	9.28	1.44169				278635	472619	9.29	2.08251				286686	477003	9.28	2.03919				153154	475019	9.28	3.4407
384204	476960	9.38	1.38009				289434	472553	9.39	1.99663				299401	477084	9.39	1.94191				161730	474572	9.38	3.31597
394031	476883	9.48	1.32289				299463	472464	9.49	1.91955				310650	477287	9.49	1.85987				169662	474545	9.48	3.20809
402282	476956	9.58	1.2766				308913	472265	9.59	1.84868				321905	477128	9.59	1.77902				178188	475199	9.58	3.10085
410794	476778	9.68	1.22863				319001	472142	9.69	1.77578				333152	477079	9.69	1.70151				187064	474725	9.68	2.98921
420082	477046	9.78	1.17959				329854	472304	9.79	1.70126				345616	477034	9.79	1.61864				196957	474869	9.78	2.87392
429126	477469	9.88	1.13364				339659	471959	9.89	1.63369				355814	476862	9.88	1.55238				206263	474730	9.88	2.76936
437356	477596	9.98	1.09149				348643	471850	9.99	1.57442				365671	476828	9.98	1.49073				215397	474426	9.98	2.67041
444738	477589	10.08	1.05379				357324	472020	10.09	1.51988				374578	476691	10.09	1.43592				223636	474237	10.08	2.58504
451896	477935	10.18	1.01949				366122	472036	10.19	1.46522				383838	477086	10.19	1.38283				232791	474386	10.18	2.49545
458148	477740	10.28	0.987648				375065	472102	10.29	1.41123				392734	477018	10.29	1.33095				241877	474380	10.28	2.40926
463933	477337	10.38	0.957511				383972	472166	10.39	1.35871				401488	477129	10.39	1.28186				251729	474704	10.39	2.32095
470441	477376	10.49	0.926345				392296	472047	10.49	1.30988				410433	477491	10.48	1.23398				261078	474906	10.48	2.23984
476986	477554	10.59	0.896091				400161	472172	10.59	1.26581				418099	477186	10.59	1.19089				270527	474761	10.59	2.15915
482697	477871	10.69	0.8708				407055	472118	10.69	1.22711				425053	477260	10.69	1.15412				279011	475019	10.68	2.09088
488654	478190	10.79	0.844699				414144	471797	10.79	1.18672				432861	477196	10.79	1.11285				288562	475253	10.78	2.01624
493857	478266	10.89	0.821221				421821	472051	10.89	1.1466				440703	477361	10.89	1.07323				297480	474673	10.88	1.94499
498804	478013	10.98	0.7976				428610	472159	10.99	1.11118				446637	477097	10.99	1.04188				305938	474582	10.98	1.88147
502875	477764	11.09	0.778135				435126	472448	11.09	1.07861				451925	477090	11.09	1.01536				314077	474907	11.08	1.82393
507485	478017	11.19	0.75879				441564	472265	11.19	1.04468				457759	476879	11.19	0.9855				322332	475137	11.18	1.76663
511278	477951	11.29	0.741721				447850	471972	11.29	1.01147				464330	476975	11.29	0.953879				330705	475033	11.28	1.70843
515629	477780	11.38	0.721846				454085	472151	11.39	0.981212				469739	477101	11.39	0.928409				339499	475227	11.38	1.65028
520766	478189	11.48	0.701462				460468	472463	11.49	0.951285				474772	477177	11.49	0.904784				346881	474531	11.48	1.59858
524558	478116	11.58	0.684791				466638	472631	11.59	0.922131				479874	476982	11.59	0.879809				354614	474676	11.58	1.54964
528194	477748	11.69	0.667513				472673	472905	11.69	0.894517				485299	477071	11.69	0.85493				362486	474413	11.69	1.49899
531682	477358	11.79	0.650863				478643	472932	11.79	0.8664				489802	476962	11.79	0.833631				370724	474751	11.79	1.45002
535503	477346	11.89	0.634692				483895	472980	11.89	0.842069				494516	477226	11.89	0.813321				378090	474554	11.89	1.40481
539759	477982	11.99	0.619873				488151	472640	11.99	0.820744				498979	477292	11.99	0.793413				384713	474929	11.99	1.36751
542593	478150	12.09	0.608879				492345	472383	12.09	0.800268				502805	477432	12.09	0.776884				391097	474685	12.09	1.32931
546033	478394	12.19	0.595804				496949	472213	12.19	0.778512				506592	477091	12.19	0.758389				398189	474951	12.19	1.29013
548573	478833	12.29	0.587424				501006	472164	12.29	0.759981				510438	477041	12.29	0.741133				405461	475081	12.29	1.25002
551601	478240	12.39	0.572248				505395	472589	12.39	0.742376				513860	476965	12.39	0.725738				411661	475261	12.39	1.21672
554658	478652	12.49	0.561748				509018	472546	12.49	0.726097				517837	477246	12.49	0.709713				417888	475527	12.49	1.18419
557440	478743	12.59	0.550917				512717	472587	12.59	0.709997				520899	476765	12.59	0.694176				423212	474955	12.59	1.15299
560287	478669	12.69	0.539105				517262	472899	12.69	0.691621				524931	476642	12.69	0.676243				429775	474970	12.69	1.11843
562684	478465	12.79	0.528538				520965	472405	12.79	0.673216				528135	476997	12.79	0.664224				435997	475029	12.79	1.08637
565073	478235	12.89	0.517921				525693	472783	12.89	0.654684				532070	477059	12.89	0.647812				441481	475226	12.89	1.05917
566906	478105	12.99	0.510021				528890	472754	13	0.640902				534273	476840	12.99	0.63748				446005	475297	12.99	1.03656
568278	478313	13.09	0.50556	2	0.929		532475	473176	13.1	0.627707	2	0.929		536235	476801	13.09	0.629047	2	0.929		451307	475228	13.09	1.00964	2	0.929
570668	478288	13.19	0.495998				534913	472441	13.2	0.613928				539511	476967	13.19	0.616123				456607	475313	13.19	0.983769
572306	478098	13.29	0.488654				538190	472441	13.3	0.600184				542899	477314	13.29	0.603672				461691	475545	13.29	0.959948
573358	477660	13.39	0.482458				541019	472779	13.4	0.589995				545229	477419	13.39	0.594529				466698	475561	13.39	0.93575
575121	477239	13.49	0.473565				545004	473436	13.5	0.576604				547891	477125	13.49	0.582182				471823	475796	13.49	0.912283
576948	477467	13.59	0.467502				546366	472594	13.6	0.566982				550043	477442	13.59	0.574855				475996	475788	13.59	0.892429
577829	477485	13.69	0.464153				548419	472270	13.7	0.556998				551527	477206	13.69	0.567679				480189	475289	13.69	0.870331
579615	477853	13.79	0.458941				551629	472743	13.8	0.546117				553956	477580	13.79	0.559553				484148	475238	13.79	0.851611
580814	477435	13.89	0.452322				555556	472661	13.9	0.529763				555276	477345	13.89	0.553089				488675	475171	13.89	0.830349
581431	477588	13.99	0.450653				556452	472705	14	0.526345				556273	477459	13.99	0.549589				492346	475335	13.99	0.814283
581836	477613	14.09	0.449204				558599	472907	14.1	0.518641				557222	477430	14.1	0.545616				495128	475084	14.09	0.800414
583227	478051	14.19	0.445893				560365	472780	14.2	0.510933				558689	477384	14.2	0.539483				500166	475592	14.19	0.780036
583917	477779	14.29	0.441952				562789	472920	14.3	0.501885				559945	477704	14.3	0.535937				504509	475521	14.29	0.760244
584878	477969	14.39	0.439146				564189	472848	14.4	0.495951				560591	477748	14.4	0.53355				506712	475587	14.39	0.750751
585567	478165	14.5	0.437419				565870	472874	14.5	0.48938				561165	477854	14.5	0.531746				510582	476018	14.5	0.735667
585530	478146	14.6	0.437472				567297	473207	14.6	0.485296				560620	477669	14.6	0.533061				513234	475676	14.6	0.722391
586308	478452	14.7	0.435923				569156	473293	14.7	0.478343				559539	477862	14.7	0.538314				516540	475628	14.7	0.707714
586225	478363	14.8	0.435823				570485	473176	14.8	0.472537				558142	477717	14.8	0.543256				518870	475570	14.8	0.697311
585634	478261	14.9	0.437613				571108	473187	14.9	0.470133				555306	477608	14.9	0.554207				520910	475994	14.9	0.690486
582970	478190	15	0.447539				570183	472928	15.01	0.472549				549812	477704	15	0.577035				521641	476134	15	0.687992
579812	478089	15.1	0.459288				569392	472518	15.11	0.473722				542689	477861	15.1	0.60712				522282	476309	15.1	0.686056
576625	478007	15.2	0.471306				569167	472631	15.21	0.475149				534459	477552	15.2	0.640054				522425	476267	15.2	0.685241
573158	478026	15.3	0.484967				568206	472613	15.31	0.478866				524646	477715	15.3	0.682526				520686	475870	15.3	0.690868
566830	478082	15.4	0.510215				566140	472622	15.41	0.487107				511857	478005	15.4	0.739429				517901	476036	15.4	0.703722
559821	478282	15.5	0.539157				563598	472588	15.51	0.497072				497201	477895	15.5	0.804288				514385	476444	15.5	0.72098
552583	478486	15.6	0.569402				561737	472853	15.61	0.505777				483910	477798	15.6	0.864808				510609	476572	15.6	0.738166
545395	478440	15.7	0.598652				558867	472837	15.71	0.517228				469709	477628	15.7	0.931037				505277	476346	15.7	0.760722
538581	478285	15.8	0.626216				555654	472738	15.81	0.529732				456636	477778	15.8	0.995266				499222	476202	15.8	0.787172
530855	478599	15.9	0.660209				551387	472843	15.91	0.54758				442242	477721	15.9	1.06708				491565	475937	15.9	0.820704
523358	478576	16	0.69211				548424	473006	16.01	0.560482				430141	477614	16	1.12901				485109	475924	16	0.850395
516055	478349	16.1	0.722666				544849	473069	16.11	0.575499				418897	477900	16.1	1.18997				478367	475931	16.1	0.881923
510883	478777	16.2	0.747347				542659	473064	16.21	0.584539				409610	477930	16.2	1.24056				472996	476126	16.2	0.908256
506254	478594	16.3	0.76697				541277	473242	16.31	0.591125				402833	477966	16.3	1.27828				467633	475464	16.3	0.930786
503662	478752	16.4	0.779265				540429	473270	16.41	0.594786				398093	478055	16.4	1.30533				464181	475411	16.4	0.94721
501104	478921	16.5	0.791517				538517	473042	16.51	0.601678				394043	478463	16.5	1.33027				460680	475536	16.5	0.964839
499108	478732	16.6	0.799611				538009	472720	16.61	0.602269				391579	478164	16.6	1.34297				459089	475805	16.6	0.973897
498773	478851	16.7	0.801681				538675	472935	16.71	0.600508				391360	478238	16.7	1.34458				458943	476148	16.7	0.976235
499304	478550	16.8	0.797872				539866	473213	16.81	0.596861				392756	478206	16.8	1.33642				459546	476194	16.8	0.973497
500251	478678	16.9	0.794209				540126	473264	16.91	0.59602				395051	478447	16.9	1.32444				459392	475576	16.9	0.971329
501716	478709	17	0.787774				541189	473446	17.01	0.59246				398392	478330	17.01	1.30494				461187	475660	17	0.96295
503629	478593	17.1	0.778664				541974	473092	17.11	0.587515				402873	478167	17.11	1.279				463647	475716	17.1	0.951243
506097	478110	17.2	0.765391				544082	473223	17.21	0.579402				408921	478183	17.21	1.24554				466930	475719	17.2	0.935379
509695	478384	17.3	0.750738				546212	473384	17.31	0.571375				416090	478298	17.31	1.20697				470682	475901	17.3	0.918229
512817	478003	17.4	0.735202				548184	473683	17.41	0.564686				423882	478442	17.41	1.16589				473952	475492	17.4	0.900713
517490	478798	17.5	0.718528				550283	473758	17.51	0.556441				431611	478468	17.51	1.12535				478107	475696	17.5	0.882035
521783	479043	17.6	0.701087				552304	473576	17.61	0.547327				440706	478694	17.61	1.07949				483062	476112	17.6	0.8608
526050	478932	17.7	0.682237				554906	473779	17.71	0.537714				449471	478691	17.71	1.03515				487005	475717	17.7	0.840637
531378	479695	17.8	0.663141				556819	473933	17.81	0.5307				458595	478801	17.81	0.990446				491121	475780	17.8	0.821995
534757	479216	17.9	0.646628				558248	473718	17.91	0.523911				467352	478595	17.91	0.94691				495144	475671	17.9	0.80312
539117	479453	18	0.629466				559752	473365	18.01	0.516179				475500	478531	18.01	0.907712				499131	475710	18.01	0.785256
542704	478765	18.11	0.611311				562648	473826	18.11	0.506756				483437	478514	18.11	0.870378				503107	475665	18.11	0.767188
546768	478729	18.21	0.594353				564435	474045	18.21	0.50066				490802	478513	18.21	0.836347				506774	475708	18.21	0.751048
550527	478888	18.31	0.579681				565551	473686	18.31	0.49451				497717	478794	18.31	0.806183				510014	475851	18.31	0.737382
554135	478994	18.41	0.565479				566934	473813	18.41	0.489617				503583	478756	18.41	0.779636				513097	475805	18.41	0.723602
557639	479193	18.51	0.552228				568893	473826	18.51	0.481916				509299	479069	18.51	0.755707				516111	476001	18.51	0.711348
559919	478577	18.61	0.540151				570578	473749	18.61	0.474894				513686	478969	18.61	0.735935				518515	475744	18.61	0.699675
563108	478979	18.71	0.529259				572257	474130	18.71	0.470091				517786	479384	18.71	0.719994				521102	476026	18.7	0.689808
564538	478569	18.81	0.521624				573285	474354	18.81	0.467115				521136	479385	18.81	0.705486				522682	476023	18.8	0.682981
567236	478932	18.91	0.512601				574411	474483	18.91	0.463311				524271	479503	18.91	0.692542				524605	476037	18.9	0.674783
569093	478863	19.01	0.504922				575749	474659	19.01	0.458909				526788	479364	19.01	0.681111				526734	476083	19	0.665886
571148	479068	19.11	0.497773				577032	474677	19.11	0.453986				529158	479377	19.11	0.67107				528933	476552	19.1	0.658726
573056	479204	19.21	0.490906				578276	474334	19.21	0.447512				531438	479279	19.21	0.660934				531278	476678	19.2	0.649366
574656	479147	19.31	0.484364				579526	474481	19.31	0.44335				532862	479399	19.31	0.655476				533152	476969	19.31	0.642815
575883	479246	19.41	0.480029				580664	474671	19.41	0.439837				534241	479097	19.41	0.648241				534442	476764	19.41	0.636409
576858	479037	19.51	0.475241				582001	474716	19.51	0.434874				535165	478838	19.51	0.643135				535853	476637	19.51	0.629876
578215	479022	19.61	0.469882	3	0.929		583652	474625	19.61	0.428068	3	0.93		536706	478755	19.61	0.636275	3	0.929		538122	476889	19.61	0.621557	3	0.93
579449	479164	19.71	0.465752				584414	474560	19.71	0.424823				537527	479118	19.71	0.63454				539278	476865	19.71	0.616614
580149	479355	19.81	0.463932				585140	474744	19.82	0.422902				538003	479297	19.81	0.633389				539958	476790	19.81	0.613424
580597	479223	19.91	0.461575				586369	475334	19.92	0.420975				538638	479142	19.91	0.630007				540716	476646	19.91	0.609587
581345	479261	20.01	0.458856				587341	475210	20.02	0.416661				539685	479126	20.01	0.625561				542239	476685	20.01	0.603442
582079	479103	20.11	0.455274				587961	474838	20.12	0.412524				540214	479047	20.11	0.622985				543714	477089	20.11	0.599235
582898	479314	20.21	0.453101				588622	474796	20.22	0.409796				542012	479554	20.21	0.617888				544851	477480	20.21	0.596377
583371	479552	20.31	0.452393				589026	474810	20.32	0.408319				542232	479212	20.31	0.615369				545091	477310	20.31	0.594585
583739	479361	20.41	0.450077				590013	474815	20.42	0.404575				543947	479332	20.41	0.608826				546393	477498	20.41	0.590102
584458	479555	20.51	0.448217				591689	475224	20.52	0.400129				545879	479443	20.51	0.601368				547335	477397	20.51	0.58575
585358	479524	20.61	0.444609				592925	475379	20.62	0.396166				547917	479590	20.61	0.593672				548407	477447	20.61	0.581582
585577	479615	20.71	0.444194				593085	475360	20.72	0.395469				548898	479372	20.71	0.588623				548677	477415	20.71	0.580324
586106	479644	20.81	0.442298				593965	475626	20.82	0.393392				550755	479337	20.81	0.580858				550105	477854	20.81	0.576543
586449	479575	20.91	0.440658				595023	475780	20.92	0.390115				553365	479787	20.91	0.572331				551219	477546	20.91	0.570539
588339	479893	21.01	0.434909				595499	475444	21.02	0.386726				555116	479543	21.01	0.564076				552760	477394	21.01	0.56354
589045	480074	21.11	0.433058				595620	475378	21.12	0.385956				556487	479714	21.11	0.559327				553567	477301	21.11	0.559818
588953	479541	21.21	0.43091				595125	474937	21.22	0.385738				557668	479867	21.21	0.555274				554989	477679	21.21	0.555826
589841	479633	21.31	0.427951				596757	475580	21.32	0.38262				558760	479604	21.31	0.549638				556247	477420	21.31	0.54951
591029	479796	21.41	0.424188				596893	475319	21.42	0.380872				559923	479821	21.41	0.545977				558167	477535	21.41	0.542298
591989	479692	21.51	0.420047				597594	475637	21.52	0.379736				560520	479971	21.51	0.544282				559527	477846	21.51	0.538287
592356	479793	21.61	0.419127				595916	475258	21.62	0.38427				559354	480060	21.61	0.549385				559015	477554	21.61	0.538971
592258	479912	21.71	0.420057				595195	475280	21.72	0.387098				557833	480061	21.72	0.555518				558851	477518	21.71	0.539462
592043	480055	21.81	0.421545				594266	475770	21.82	0.392933				555347	480240	21.82	0.566408				557775	477484	21.81	0.543639
591154	479941	21.91	0.424392				592836	475923	21.92	0.399078				552226	480334	21.92	0.579532				556809	477852	21.91	0.549273
590183	480007	22.01	0.428401				590586	475294	22.02	0.404659				547861	480147	22.02	0.596514				554874	477797	22.02	0.556849
588937	479911	22.12	0.432707				589572	475626	22.12	0.410098				543045	479997	22.12	0.615681				552823	478047	22.12	0.56636
587044	480362	22.22	0.442066				587178	475869	22.22	0.420404				535592	479919	22.22	0.646415				549115	478294	22.22	0.582667
583370	480340	22.32	0.456091				584762	475758	22.32	0.429158				528632	480007	22.32	0.676264				545280	478455	22.32	0.599197
579997	480284	22.42	0.468879				582726	475845	22.42	0.437418				521427	479744	22.42	0.705914				541164	478117	22.42	0.614658
576707	480239	22.52	0.481469				580579	475685	22.52	0.444968				513605	479596	22.52	0.739234				536729	478125	22.52	0.633215
572071	480428	22.62	0.500519				577699	475628	22.62	0.45589				504722	479639	22.62	0.778699				530962	477932	22.62	0.656617
567018	480518	22.72	0.520906				575913	476069	22.72	0.464944				496628	479621	22.72	0.814996				526312	478142	22.72	0.677401
561713	480225	22.82	0.540688				574230	476159	22.82	0.471955				489837	479821	22.82	0.84692				522285	478271	22.82	0.695294
558294	480657	22.92	0.556451				573110	476309	22.92	0.477058				483869	479880	22.92	0.874783				518869	478284	22.92	0.710122
554176	480656	23.02	0.573107				572338	476159	23.02	0.479382				478696	480155	23.02	0.900261				515627	478329	23.02	0.724439
550756	481096	23.12	0.589097				571525	476290	23.12	0.4832				473795	480258	23.12	0.923903				512277	478224	23.12	0.738614
547033	481399	23.22	0.605778				570752	476203	23.23	0.485835				469657	480203	23.22	0.943386				509621	478091	23.22	0.749686
544221	481124	23.32	0.616091				570798	476110	23.33	0.485214				467640	480030	23.32	0.952261				509242	478462	23.32	0.753106
542680	481272	23.42	0.623164				571797	476276	23.43	0.482063				467373	480348	23.42	0.955037				508742	478150	23.42	0.753848
540803	480955	23.52	0.629479				571305	475614	23.53	0.48087				466127	480050	23.52	0.959648				507896	477796	23.52	0.755927
538761	480947	23.62	0.637955				571642	475906	23.63	0.480925				466128	480239	23.62	0.960529				507456	477685	23.62	0.757355
537987	481093	23.72	0.641873				572995	476452	23.73	0.478185				468277	480441	23.72	0.951124				508535	477770	23.72	0.752975
538726	481290	23.82	0.639705				574713	476690	23.83	0.472571				471129	480577	23.82	0.938096				510584	478119	23.82	0.745569
539352	481210	23.92	0.636718				575434	476407	23.93	0.468413				474519	480793	23.92	0.922972				512825	478466	23.92	0.737346
539501	480723	24.02	0.633817				576139	476413	24.03	0.465686				478015	480915	24.02	0.907024				514278	478159	24.02	0.729534
540410	480549	24.12	0.629214				577015	476490	24.13	0.462631				481128	480537	24.12	0.890647				516410	478268	24.12	0.720737
542453	480680	24.22	0.621336				578784	476466	24.23	0.455629				484532	480275	24.22	0.873553				518982	478285	24.22	0.709637
545379	481001	24.32	0.610732				580245	476335	24.33	0.449336				489019	480486	24.32	0.853798				521823	478396	24.32	0.697873
548181	480955	24.42	0.598984				581990	476525	24.43	0.443476				493199	480459	24.42	0.834517				524300	478358	24.42	0.687037
551064	481304	24.52	0.588812				582692	476531	24.53	0.440792				496720	480319	24.52	0.817852				526601	478646	24.52	0.678537
554206	481507	24.62	0.576966				583955	476552	24.63	0.436018				500935	480796	24.62	0.80107				528613	478380	24.62	0.668704
556664	481208	24.72	0.565609				585229	476866	24.73	0.432596				505001	481048	24.72	0.784056				530610	478511	24.72	0.660834
559166	480857	24.82	0.553875				586637	476953	24.83	0.427599				508329	480916	24.82	0.768657				532396	478260	24.82	0.652092
562318	480781	24.92	0.540869				587993	477009	24.93	0.422667				511314	480931	24.92	0.755551				534214	478135	24.92	0.643832
565670	480965	25.02	0.528355				588607	476919	25.03	0.419894				514570	481143	25.02	0.742257				535981	478403	25.02	0.637661
568410	481202	25.12	0.518589				588958	476854	25.13	0.418246				517107	481116	25.12	0.731063				536969	478161	25.12	0.632378
571244	481289	25.22	0.507804				589775	476960	25.23	0.415626				519409	481081	25.22	0.720903				538099	478275	25.22	0.628184
574427	481836	25.32	0.497855				589933	476828	25.33	0.4144				521327	481053	25.32	0.712478				539130	478762	25.32	0.626166
576141	481423	25.42	0.489221				590070	477128	25.43	0.415293				522496	480980	25.43	0.707095				539092	478761	25.42	0.62632
577888	481364	25.52	0.482131				588538	476745	25.53	0.419337				523301	481244	25.53	0.704866				537467	478470	25.52	0.631746
578856	481074	25.62	0.477009				587231	477313	25.63	0.427019				522895	481318	25.63	0.706958				535420	478668	25.63	0.641264
580170	481108	25.73	0.472065				583997	477139	25.73	0.438627				520632	481340	25.73	0.716822				531361	478836	25.73	0.659179
581835	481542	25.83	0.467645				578349	477216	25.83	0.46086				516800	481528	25.83	0.734326				522909	478854	25.83	0.695348
582433	481667	25.93	0.465917				568501	477688	25.93	0.501735				507009	481661	25.93	0.777992				507369	478890	25.93	0.76341
582197	481919	26.03	0.468006				548973	477345	26.03	0.57878				486682	481947	26.03	0.871411				479228	479519	26.03	0.894779
581268	482291	26.13	0.473337	4	0.93		523306	477305	26.13	0.686349	4	0.929		454315	482037	26.13	1.02671	4	0.929		438889	479352	26.13	1.09188	4	0.929
578802	482044	26.23	0.481752				487955	477506	26.23	0.844699				406245	482121	26.23	1.27877				385361	479450	26.23	1.38504
574048	482011	26.33	0.500158				441233	477758	26.33	1.07239				340707	482129	26.33	1.67474				319966	479292	26.33	1.8028
563426	482182	26.43	0.542988				386695	477624	26.43	1.36868				268029	481715	26.43	2.21275				251712	479005	26.43	2.3414
545239	482344	26.53	0.617584				328120	477325	26.53	1.73692				196266	481655	26.53	2.91376				187786	478829	26.53	2.99991
515814	482158	26.63	0.741566				278289	477813	26.63	2.10991				140480	481719	26.63	3.66662				138863	478669	26.62	3.67837
473232	482394	26.73	0.936566				232438	477229	26.73	2.51232				97149	482034	26.73	4.49809				101098	479043	26.72	4.39442
413432	482312	26.83	1.2402				195577	477503	26.83	2.90219				66486	481656	26.83	5.34981				74321	479330	26.83	5.08821
343419	482448	26.93	1.65838				165236	477643	26.93	3.28222				46110	481918	26.93	6.17461				55330	479264	26.93	5.75196
275391	482438	27.03	2.15514				144531	477440	27.03	3.58256				34409	481736	27.03	6.83249				43788	479225	27.03	6.27828
216035	482550	27.13	2.70196				129853	477986	27.13	3.82613				27019	482266	27.13	7.37907				36613	478868	27.13	6.67933
169818	482550	27.23	3.24367				121190	477774	27.23	3.98051				22848	481911	27.23	7.75476				32781	478484	27.23	6.92632
130296	482825	27.33	3.84113				114318	478251	27.34	4.11413				19568	481887	27.33	8.10339				29954	478713	27.33	7.13036
102183	482490	27.43	4.38653				110344	478082	27.44	4.19296				17485	481599	27.43	8.35534				28285	479093	27.43	7.26116
82814	482870	27.53	4.86127				108509	477920	27.54	4.22993				16148	482157	27.53	8.53696				27300	478749	27.53	7.33931
70074	482549	27.63	5.2357				108394	478040	27.64	4.23288				15215	482096	27.63	8.67061				26803	479121	27.63	7.38241
60927	482760	27.73	5.55146				109483	477983	27.74	4.21012				14617	482089	27.73	8.76081				26788	479290	27.73	7.38446
55852	483085	27.83	5.7487				112253	478160	27.84	4.15472				14429	481956	27.83	8.78932				27172	479763	27.83	7.35465
52766	483329	27.93	5.87775				116630	478063	27.94	4.06818				14528	482092	27.93	8.77457				28095	479689	27.93	7.27913
50377	482688	28.03	5.97903				121003	477924	28.04	3.98469				14545	482007	28.03	8.77154				28858	479103	28.03	7.21608
49315	482807	28.13	6.02753				126351	477857	28.14	3.88705				14754	481955	28.13	8.73919				29948	479130	28.13	7.13277
49495	482896	28.23	6.01975				132917	478133	28.24	3.77434				15207	482145	28.23	8.67202				31275	479332	28.23	7.03614
50607	483074	28.33	5.97058				141124	478208	28.34	3.63986				15862	481889	28.33	8.57592				33213	479376	28.33	6.90105
51748	483341	28.43	5.92164				148960	478256	28.44	3.51847				16478	482059	28.43	8.49097				35110	479464	28.43	6.77646
53312	483161	28.53	5.8538				157048	478451	28.54	3.4004				17118	482171	28.53	8.40574				37083	479862	28.53	6.65529
55310	483268	28.63	5.7715				165650	478409	28.64	3.2802				17886	482044	28.63	8.30639				39182	479726	28.63	6.53075
58358	483333	28.73	5.65108				175260	478940	28.74	3.15579				18926	482466	28.73	8.18116				41741	479819	28.73	6.38881
61974	483459	28.83	5.51637				185242	478419	28.84	3.02868				20144	482528	28.83	8.04109				44831	480192	28.83	6.22984
66098	483335	28.93	5.37082				195462	478705	28.94	2.90917				21394	482323	28.93	7.90465				48130	480372	28.93	6.07089
70135	483108	29.03	5.23634				204680	478393	29.04	2.804				22724	482503	29.03	7.76976				51461	479864	29.03	5.91791
74862	482890	29.13	5.08854				213395	478375	29.14	2.71008				24132	482684	29.13	7.63532				54819	479910	29.13	5.77587
80639	483708	29.23	4.92507				222880	478426	29.24	2.61245				25948	482363	29.23	7.47054				59094	480409	29.23	5.60922
87787	483406	29.33	4.73253				233789	478243	29.34	2.50405				28279	482407	29.33	7.27715				64253	480332	29.33	5.4205
95531	483306	29.43	4.54182				244293	478458	29.44	2.40616				30675	482415	29.43	7.09417				69678	480115	29.43	5.23707
102792	483535	29.53	4.37802				253165	478608	29.54	2.32658				32910	482758	29.53	6.9375				74748	480314	29.53	5.07994
111411	483901	29.63	4.19852				263378	479288	29.64	2.24077				35790	482722	29.63	6.74853				80549	480367	29.64	4.91198
120950	483773	29.73	4.01305				272726	479035	29.74	2.1611				38810	482746	29.73	6.56634				86526	480341	29.74	4.75077
131820	483744	29.83	3.81925				283411	478962	29.84	2.07427				42468	482770	29.83	6.36375				93380	480286	29.84	4.57896
141501	483596	29.93	3.65907				293393	479074	29.94	1.9969				45877	482558	29.93	6.189				99782	480464	29.94	4.43057
151034	483742	30.03	3.51302				302046	478995	30.04	1.93111				49373	482710	30.03	6.02443				105406	480453	30.04	4.30712
159912	483733	30.13	3.38444				311528	479267	30.14	1.86283				53597	482623	30.13	5.83929				108350	480539	30.14	4.24553
170268	483765	30.23	3.24337				321674	479215	30.24	1.79046				58392	482864	30.24	5.64758				114315	480659	30.24	4.12549
179479	483655	30.33	3.1243				332259	479380	30.34	1.71837				63487	483179	30.34	5.46079				123781	480656	30.34	3.94644
189372	483846	30.44	3.00444				343171	479632	30.44	1.64684				69452	483386	30.44	5.25966				133794	480738	30.44	3.77177
198803	483546	30.54	2.89367				353657	479325	30.54	1.57766				75645	483360	30.54	5.06732				142249	480572	30.54	3.63309
207958	483756	30.64	2.79333				362367	478795	30.64	1.52042				81405	483633	30.64	4.90344				149174	481033	30.64	3.52827
215592	483760	30.74	2.71222				371480	479232	30.74	1.46658				87305	483542	30.74	4.74555				155970	480711	30.74	3.42651
224516	483960	30.84	2.62187				381103	479937	30.85	1.41233				93931	483385	30.84	4.58019				162941	480832	30.84	3.32868
233158	484074	30.94	2.5374				389242	479510	30.95	1.36277				100365	483323	30.94	4.43081				169371	480631	30.94	3.24064
240942	484049	31.04	2.46338				396547	479256	31.05	1.31974				106295	483172	31.04	4.30092				175714	480225	31.04	3.15599
248089	484195	31.14	2.39828				403981	479186	31.15	1.27761				112600	483210	31.14	4.17142				182639	480551	31.14	3.07053
255668	483880	31.24	2.32909				411858	479357	31.25	1.23495				119251	482844	31.24	4.04056				189843	480746	31.24	2.98439
263817	483836	31.34	2.25828				420217	479289	31.35	1.18942				126126	483102	31.34	3.91563				196797	480628	31.34	2.90287
272241	484206	31.44	2.18926				428443	479658	31.45	1.14752				132820	483046	31.44	3.79899				203487	480396	31.44	2.82656
279757	483992	31.54	2.12698				435498	479634	31.55	1.11065				139037	483416	31.54	3.69776				209996	480468	31.54	2.75603
286631	484006	31.64	2.07242				441874	479713	31.65	1.07832				144409	483110	31.64	3.61103				216518	480845	31.64	2.68897
293698	484244	31.74	2.01871				448370	479698	31.75	1.0454				150605	483245	31.74	3.51711				223453	481116	31.74	2.61929
301609	484022	31.84	1.95787				455086	479693	31.85	1.01192				156784	483653	31.84	3.42853				229330	480978	31.84	2.56022
309151	484226	31.94	1.90323				459672	479988	31.95	0.990739				161889	483833	31.94	3.35725				235422	481354	31.94	2.50298
315278	484206	32.04	1.85898				462089	479878	32.05	0.978421				166110	483587	32.04	3.29819				241336	481107	32.04	2.44599
321759	484199	32.14	1.81315				463964	479208	32.15	0.966164				170924	483611	32.14	3.234				247997	481208	32.14	2.38519
329202	484346	32.24	1.76237				469939	479055	32.25	0.936649				176971	484061	32.24	3.15786				255480	480907	32.24	2.31688
337038	484463	32.34	1.70997				476997	479378	32.35	0.904618				182640	484358	32.34	3.08828				262237	481473	32.34	2.26078
344130	484821	32.44	1.66477				482599	479486	32.45	0.878849				188024	484210	32.44	3.02221				268708	481369	32.44	2.20544
350747	484473	32.54	1.6203				487411	479456	32.55	0.85638				193154	484334	32.54	2.96221				275002	481241	32.54	2.15273
357227	484272	32.64	1.57817	5	0.929		491790	479717	32.65	0.837477	5	0.929		198549	483998	32.64	2.89865	5	0.929		281690	481070	32.64	2.09786	5	0.929
364709	484611	32.74	1.53309				496579	479949	32.75	0.816757				204824	484418	32.74	2.83058				288769	481441	32.74	2.04374
371466	484620	32.84	1.49182				500490	480238	32.85	0.800457				210111	484286	32.84	2.77262				294589	481435	32.84	1.9988
374681	484686	32.94	1.47273				503612	480300	32.95	0.786753				213637	483970	32.94	2.73369				299994	481541	32.94	1.95838
376459	484862	33.04	1.4629				506178	480508	33.05	0.77629				217334	484248	33.04	2.69638				305422	481318	33.04	1.91699
379685	484987	33.14	1.44427				509045	480524	33.15	0.763654				220946	483896	33.14	2.65765				311196	482232	33.14	1.87911
385864	485189	33.24	1.40888				512079	480539	33.25	0.750351				225076	483941	33.24	2.61618				317010	481839	33.25	1.83562
393203	484935	33.34	1.3653				515494	480471	33.35	0.735075				229401	484021	33.34	2.57371				323146	481861	33.35	1.79258
400120	484907	33.44	1.32593				518886	480648	33.45	0.721144				233527	483681	33.44	2.53202				329456	481988	33.45	1.74965
406056	485074	33.54	1.29356				521370	480270	33.55	0.708626				237053	484026	33.54	2.4999				335480	482249	33.55	1.71009
410856	485104	33.64	1.26726				524136	480622	33.65	0.698367				240442	484287	33.64	2.46916				341870	482142	33.65	1.66713
415579	484799	33.74	1.24012				527347	480948	33.75	0.686148				243737	484453	33.75	2.43931				347703	481773	33.75	1.62733
419533	484687	33.84	1.21829				529503	480723	33.85	0.675913				246475	484612	33.84	2.41491				352818	481481	33.85	1.5931
423275	484652	33.94	1.19814				531659	480657	33.95	0.66646				248544	484359	33.95	2.39492				358486	482298	33.95	1.56106
427297	484959	34.05	1.17828				533346	480739	34.05	0.659714				250646	484694	34.05	2.37752				363567	482688	34.05	1.5312
430757	484688	34.15	1.15888				534821	480543	34.15	0.652581				252663	484473	34.15	2.35846				367814	482390	34.15	1.50368
435223	485100	34.25	1.13758				536643	480571	34.25	0.645059				255150	484300	34.24	2.33561				371867	482148	34.25	1.47788
439222	484970	34.35	1.11639				538703	480753	34.35	0.637289				257655	484773	34.34	2.31582				374992	481920	34.35	1.45799
442577	485068	34.45	1.09972				539805	480726	34.45	0.632564				259209	485202	34.45	2.30428				377462	481924	34.45	1.44323
446022	485231	34.55	1.08303				539734	480330	34.55	0.631005				259910	485307	34.55	2.29869				379895	481940	34.55	1.42885
449380	484981	34.65	1.06499				540342	480514	34.65	0.629333				260712	485256	34.64	2.29152				381866	482010	34.65	1.41753
453289	485404	34.74	1.04746				540252	480581	34.75	0.630022				260787	484688	34.74	2.28824				382130	481767	34.75	1.41484
456347	485229	34.84	1.03152				539100	480391	34.85	0.633936				260433	484787	34.84	2.29175				381860	482237	34.85	1.41862
458916	484972	34.95	1.01769				537099	480823	34.95	0.644327				258053	484771	34.95	2.31234				379865	482401	34.95	1.43118
461763	485149	35.05	1.00459				533387	480598	35.06	0.658881				255979	484836	35.05	2.3308				376417	482150	35.05	1.45053
464758	485271	35.15	0.99061				529415	480788	35.16	0.676592				255389	485436	35.15	2.33878				372489	482630	35.15	1.47637
467988	485290	35.25	0.975112				525656	481137	35.26	0.69426				254679	484993	35.25	2.34299				366783	482110	35.25	1.50869
470605	485670	35.35	0.964324				519657	481118	35.36	0.720002				253534	484697	35.35	2.35175				359660	481699	35.35	1.5509
472572	485618	35.45	0.954697				512805	481378	35.46	0.751089				251902	485001	35.45	2.3677				352169	481895	35.45	1.59918
474147	485373	35.55	0.946073				505638	481655	35.56	0.784057				249742	485161	35.55	2.38782				344285	481952	35.55	1.6504
476637	485552	35.65	0.935116				498979	481286	35.66	0.812167				247102	484770	35.65	2.40992				336979	483130	35.65	1.70417
477912	485891	35.75	0.930675				492920	481212	35.76	0.839315				244660	484844	35.75	2.43262				330327	483036	35.75	1.7486
477430	485374	35.85	0.93055				486310	481437	35.86	0.870749				241265	485054	35.85	2.46504				322523	482808	35.85	1.80134
475810	485137	35.95	0.9371				480229	481823	35.96	0.90087				237374	484951	35.95	2.50115				315451	482797	35.95	1.85118
474475	485428	36.05	0.944772				474687	481753	36.06	0.926665				233465	485123	36.05	2.53931				309555	483106	36.05	1.89508
471880	485614	36.15	0.957976				469953	481288	36.16	0.947048				229745	485270	36.15	2.57614				304352	482666	36.15	1.93118
468193	485829	36.25	0.976625				467205	481437	36.26	0.960942				225912	485410	36.25	2.61465				300487	482053	36.25	1.95708
463713	486024	36.35	0.999166				466012	481246	36.36	0.965803				222378	485468	36.35	2.65041				298647	482091	36.35	1.97108
457143	485641	36.45	1.0295				465399	481401	36.46	0.96949				217878	485415	36.45	2.69617				298019	482779	36.46	1.97903
449241	485733	36.55	1.06917				465656	481824	36.56	0.970224				213295	485473	36.55	2.74428				297691	482343	36.56	1.97947
440176	485655	36.65	1.11468				466335	481690	36.66	0.966319				208801	485475	36.65	2.79221				298762	482453	36.66	1.9719
430524	485535	36.75	1.16402				468346	481884	36.76	0.957541				204547	485229	36.75	2.83739				300911	482596	36.76	1.95644
419596	485752	36.85	1.22289				470374	481791	36.86	0.947383				200362	485575	36.85	2.88552				303958	482752	36.86	1.9345
408378	485736	36.95	1.2838				473226	482065	36.96	0.935059				196541	485460	36.95	2.92831				307537	482528	36.96	1.90711
396792	485707	37.05	1.34844				475862	481830	37.06	0.921461				192924	485152	37.05	2.96869				311678	482549	37.06	1.87711
386789	485637	37.15	1.40557				478928	481497	37.16	0.905452				190385	485405	37.15	2.99967				316884	482658	37.16	1.84033
377579	485693	37.25	1.46006				483172	481800	37.26	0.887013				188322	485486	37.25	3.02457				322679	482943	37.26	1.80088
369117	485848	37.35	1.51179				487258	481756	37.36	0.867857				186893	485683	37.35	3.04262				328556	482631	37.36	1.75881
361269	485646	37.45	1.55922				491660	482069	37.46	0.849079				185809	485375	37.45	3.05429				335170	482907	37.46	1.71524
355641	485660	37.55	1.59462				495892	482248	37.56	0.830626				186011	485506	37.55	3.05245				341148	482830	37.56	1.6751
351916	485712	37.65	1.61855				500354	482430	37.66	0.811317				187035	485398	37.65	3.03959				347150	482577	37.66	1.63467
349777	485621	37.75	1.63185				504680	482108	37.76	0.790441				189152	485596	37.75	3.01518				353728	482744	37.76	1.5932
347843	485674	37.85	1.64458				508611	482023	37.86	0.772583				191870	485739	37.85	2.98374				360337	482796	37.86	1.55179
347431	485795	37.95	1.6478				512971	482165	37.96	0.754037				195806	486019	37.95	2.93934				366543	482650	37.96	1.51268
348484	485769	38.05	1.64087				516492	482112	38.06	0.738395				200411	486247	38.05	2.88808				372241	483097	38.06	1.48005
352257	486430	38.15	1.6197				520611	482057	38.16	0.720262				206577	486428	38.15	2.82072				377847	482973	38.16	1.44583
355740	486085	38.25	1.59596				524608	482184	38.26	0.703643				213333	486116	38.25	2.74686				383785	483083	38.26	1.41125
360774	486622	38.35	1.56682				528814	482765	38.36	0.688383				220721	486020	38.35	2.6698				389560	482845	38.36	1.37653
365482	486619	38.45	1.53763				532172	482577	38.46	0.673261				228456	485755	38.45	2.59105				394342	482606	38.46	1.34796
371748	486630	38.55	1.49943				535741	482686	38.57	0.658727				236956	486113	38.56	2.5105				399416	482917	38.56	1.32064
378051	486329	38.65	1.4602				539298	482930	38.67	0.644972				245808	486511	38.66	2.4298				403907	483453	38.66	1.29797
385664	486323	38.75	1.4153				542513	482972	38.77	0.631792				255079	486334	38.76	2.34567				408723	483440	38.76	1.27124
393352	486668	38.86	1.37248				545413	482805	38.87	0.619016				264294	485979	38.86	2.26416				413114	483267	38.86	1.24638
400714	486356	38.96	1.32931				547964	482578	38.97	0.607457				273207	485820	38.96	2.18878				417839	483454	38.96	1.22166
408141	486426	39.06	1.2883				551189	482983	39.07	0.596138				282019	486158	39.06	2.11891				421737	483212	39.06	1.19964
415636	486341	39.16	1.24696	6	0.929		553605	482750	39.17	0.58521	6	0.929		290172	486136	39.16	2.05467	6	0.929		425640	483150	39.16	1.17862	6	0.929
422638	486245	39.26	1.20892				556124	482739	39.27	0.574942				297689	485890	39.26	1.99598				428722	483011	39.26	1.16173
431088	486787	39.36	1.16687				558360	482692	39.37	0.565693				305052	485910	39.36	1.94108				432814	483097	39.36	1.14076
438545	486959	39.46	1.12907				560562	482697	39.47	0.556858				312124	485909	39.46	1.8895				436700	482982	39.46	1.12011
444890	486722	39.56	1.09565				562603	482904	39.57	0.549644				317846	485980	39.56	1.84895				441046	483778	39.56	1.10153
450963	486485	39.66	1.06404				564581	482836	39.67	0.541429				323569	486155	39.66	1.8096				444156	483570	39.66	1.08475
457867	486920	39.76	1.03186				565842	482765	39.77	0.536078				328761	485948	39.76	1.77282				447737	483514	39.76	1.06641
463581	486644	39.86	1.00267				567327	482795	39.87	0.530319				334170	485922	39.86	1.73597				449849	483441	39.86	1.05548
469278	486796	39.96	0.975891				568741	482863	39.97	0.525034				339071	486002	39.96	1.70358				454780	483648	39.96	1.03191
474500	486886	40.06	0.951403				570070	482785	40.07	0.519418				343373	485901	40.06	1.67474				458184	484033	40.07	1.01692
479138	486725	40.16	0.928768				571670	483133	40.17	0.514732				347641	486219	40.16	1.64841				461036	483952	40.17	1.00258
483499	486427	40.26	0.907				572450	482976	40.27	0.510932				351935	486607	40.26	1.62258				463527	483802	40.27	0.989756
488080	486448	40.36	0.885875				573747	483305	40.37	0.507372				355833	486371	40.36	1.5967				466129	483751	40.37	0.976922
492074	486237	40.46	0.866558				574577	483265	40.47	0.503932				359283	486471	40.46	1.57544				468088	483516	40.47	0.96639
496043	486478	40.56	0.849595				574910	482949	40.57	0.501156				362357	486655	40.56	1.55712				469623	483465	40.57	0.958785
500248	486974	40.66	0.832891				575181	482989	40.67	0.500282				365041	486459	40.66	1.53961				470983	483539	40.67	0.952622
504110	487332	40.76	0.817238				575598	483473	40.77	0.500905				368277	486630	40.76	1.52054				471806	483503	40.77	0.948525
507482	487140	40.86	0.801348				575058	483306	40.87	0.50224				371217	486545	40.86	1.50225				472809	483945	40.87	0.945802
510394	487083	40.96	0.788208				574703	483343	40.97	0.503802				374127	486834	40.96	1.48602				472343	483891	40.97	0.94777
513011	486784	41.06	0.775317				573750	483594	41.07	0.508705				376431	486771	41.06	1.47191				470924	483661	41.07	0.953471
515150	486573	41.16	0.764978				572252	483849	41.17	0.515775				378696	486861	41.16	1.45882				469191	484117	41.17	0.963889
518268	487195	41.26	0.754273				569139	483480	41.27	0.526333				380996	486767	41.26	1.44476				466620	484560	41.27	0.978313
520825	487279	41.36	0.743585				566344	483370	41.37	0.5369				383302	486842	41.36	1.43153				462957	484478	41.37	0.995668
522732	486985	41.46	0.734002				563497	483422	41.47	0.548484				384656	486932	41.46	1.42401				458633	484654	41.47	1.0176
524322	486797	41.56	0.726298				559365	483566	41.57	0.565717				385958	487216	41.56	1.41772				451959	484368	41.57	1.04926
525914	486691	41.67	0.718985				553970	483444	41.67	0.58696				386820	487299	41.66	1.41308				444509	484206	41.67	1.08591
527738	486806	41.77	0.711725				548333	483457	41.77	0.610037				387363	487260	41.76	1.40974				436848	484372	41.77	1.12581
529573	487130	41.87	0.705411				542958	483923	41.87	0.634374				387882	487209	41.86	1.40649				428139	484065	41.87	1.1697
531371	487221	41.97	0.698204				537192	483918	41.97	0.658377				387742	486701	41.96	1.40496				419768	484350	41.97	1.21546
532387	486779	42.07	0.691863				531930	483605	42.07	0.679073				387282	486633	42.06	1.40732				411549	483980	42.07	1.25824
533762	486867	42.17	0.686465				526851	483624	42.17	0.700753				386181	486815	42.16	1.41456				403545	484652	42.17	1.30556
534973	487268	42.27	0.683217				522794	484254	42.27	0.721079				384851	487011	42.27	1.42323				395991	484494	42.27	1.34736
535749	487136	42.37	0.679346				519241	484082	42.37	0.735626				382505	486825	42.37	1.43613				390025	484678	42.37	1.38237
536411	487298	42.47	0.677315				517137	484410	42.47	0.746288				379307	486539	42.47	1.45371				385162	484734	42.47	1.41087
536440	487351	42.56	0.677438				514625	484222	42.58	0.756372				375200	486866	42.56	1.47972				380010	484202	42.57	1.4387
535638	487382	42.66	0.680948				512904	484341	42.68	0.764464				370039	486731	42.66	1.51026				376658	484456	42.67	1.45982
534756	487595	42.77	0.68564				511920	484273	42.78	0.768469				364437	486462	42.76	1.54335				374985	485021	42.77	1.47246
533506	487741	42.87	0.691581				512346	484404	42.88	0.767206				358845	486763	42.86	1.57954				374116	484638	42.87	1.47591
531300	487827	42.97	0.701302				513198	484370	42.98	0.763309				352056	486950	42.96	1.62339				374764	484768	42.97	1.47262
527970	487930	43.07	0.715926				514351	484136	43.08	0.757171				344745	487149	43.06	1.67153				376084	484661	43.07	1.46421
523145	487767	43.17	0.735835				516252	484459	43.18	0.75037				336619	487372	43.16	1.72625				378274	484755	43.17	1.45158
518257	487978	43.27	0.757934				518777	484700	43.28	0.740509				329142	487277	43.26	1.77636				381082	484570	43.28	1.43407
512029	487638	43.37	0.783574				521304	484599	43.38	0.729105				321599	487380	43.37	1.82901				385361	484856	43.38	1.41027
505024	487543	43.47	0.814136				524210	484360	43.48	0.715484				313761	487278	43.47	1.88406				389800	484604	43.48	1.38333
496614	487857	43.57	0.853376				527217	484464	43.58	0.703095				306131	487572	43.57	1.94082				394684	484522	43.58	1.35493
487530	487955	43.67	0.895374				530426	484582	43.68	0.689987				298905	487253	43.67	1.9931				400025	484615	43.68	1.32511
478639	487998	43.77	0.936992				533305	484533	43.78	0.677578				293204	486858	43.77	2.03462				405233	484775	43.78	1.29674
470297	487773	43.87	0.975521				536274	484216	43.88	0.663611				288810	487046	43.87	2.06947				410743	484949	43.88	1.26716
462133	487973	43.97	1.01585				539744	484380	43.98	0.649859				285304	487429	43.97	2.09872				416284	484936	43.98	1.23694
453599	487989	44.07	1.05787				543075	484510	44.08	0.636617				282403	487399	44.07	2.12158				422196	485008	44.08	1.20554
446401	487902	44.17	1.09347				545909	484496	44.18	0.624839				281402	487739	44.17	2.13114				427288	485090	44.18	1.17894
441272	487810	44.27	1.11905				548505	484186	44.28	0.612722				281661	487997	44.27	2.13026				432226	485228	44.28	1.15372
437896	488099	44.37	1.13767				551330	484116	44.38	0.600836				282891	487823	44.37	2.11965				436606	485026	44.38	1.13009
434332	488239	44.47	1.1567				554497	484327	44.48	0.588926				284980	487842	44.47	2.10318				441588	484916	44.48	1.10405
432091	488310	44.57	1.16867				557092	484371	44.58	0.578623				288032	487602	44.57	2.0781				446112	485036	44.58	1.08167
430759	488233	44.67	1.17527				559569	484346	44.68	0.568523				292097	487573	44.67	2.04643				450688	485170	44.68	1.05932
430768	488350	44.77	1.17576				562115	484594	44.78	0.559459				297069	487668	44.77	2.00889				454267	484748	44.78	1.03957
432056	488282	44.87	1.16873				564686	484909	44.88	0.550652				302923	487869	44.87	1.9659				458753	485486	44.88	1.02087
434603	488268	44.97	1.15543				566448	484680	44.98	0.542578				309473	487880	44.97	1.91781				461214	485091	44.98	1.007
438139	488290	45.07	1.1373				568644	484867	45.08	0.534738				316980	487954	45.07	1.86421				464794	485150	45.08	0.989875
441853	488234	45.17	1.11805				570347	484785	45.18	0.527628				324742	488074	45.17	1.81032				468116	485134	45.18	0.973773
446386	488275	45.27	1.09526				572234	484948	45.28	0.520951				332008	487915	45.27	1.75979				471008	485052	45.28	0.959533
451534	488441	45.37	1.07022				573756	485004	45.38	0.515234				340112	488021	45.37	1.70601				473865	485141	45.38	0.946336
457575	488661	45.47	1.04133				575524	485367	45.48	0.509993				347995	488010	45.47	1.65439				476505	484802	45.48	0.93226
463584	488944	45.57	1.01327				576647	485392	45.58	0.505722				356324	488051	45.57	1.60135				478866	484541	45.58	0.919926
468859	488421	45.67	0.985401	7	0.93		577565	485414	45.68	0.502245	7	0.929		363497	487966	45.67	1.55611	7	0.929		481458	484523	45.68	0.907694	7	0.93
474680	488361	45.77	0.957357				578398	485487	45.78	0.49934				370803	488375	45.77	1.51321				484056	485118	45.78	0.898345
480417	488347	45.87	0.930256				579264	485710	45.88	0.497006				377503	488387	45.87	1.47297				485839	485183	45.88	0.890372
486952	488645	45.97	0.901223				579059	485324	45.98	0.496014				383673	488227	45.97	1.43575				487172	485177	45.98	0.884178
493305	489158	46.07	0.874414				579222	485457	46.09	0.495997				389960	488508	46.07	1.40046				488387	485277	46.08	0.879036
498860	489407	46.17	0.850359				579311	485668	46.19	0.496629				394862	488150	46.17	1.3707				488862	485380	46.18	0.877326
504063	489528	46.27	0.827566				578928	485716	46.29	0.49834				399400	488139	46.27	1.34493				489110	485779	46.28	0.878034
509059	489771	46.38	0.806487				577320	485193	46.39	0.502175				404203	488202	46.37	1.31832				487668	485691	46.38	0.884271
513290	489386	46.48	0.786091				576080	485386	46.49	0.507908				408567	488408	46.47	1.2951				486060	485665	46.48	0.891583
518075	489734	46.58	0.766808				574526	485514	46.59	0.514581				412778	488455	46.57	1.27225				484159	485484	46.58	0.899563
521597	489610	46.68	0.750991				572217	485309	46.69	0.522693				415772	488398	46.68	1.25572				481482	485752	46.68	0.913283
525155	489646	46.78	0.735858				570195	485692	46.79	0.532434				418658	488283	46.78	1.23962				477631	485581	46.79	0.930562
528365	489868	46.88	0.723164				566841	485325	46.89	0.54401				421298	488343	46.88	1.22575				473139	485643	46.89	0.952114
531896	490260	46.98	0.709975				563707	485251	46.99	0.556144				424106	488407	46.98	1.2111				468508	485681	46.99	0.974426
534543	490220	47.08	0.69862				560760	484996	47.09	0.566757				426429	488361	47.08	1.19859				463790	485736	47.09	0.997458
537232	490276	47.18	0.687584				558517	485137	47.19	0.57643				428342	488569	47.18	1.18948				459358	485817	47.19	1.01944
539148	490143	47.28	0.678962				556018	485281	47.29	0.58719				429604	488419	47.28	1.18217				454188	485764	47.29	1.04467
541146	490083	47.38	0.670362				553242	485232	47.39	0.598227				431324	488975	47.38	1.17573				449532	486098	47.39	1.0694
542924	490139	47.48	0.663237				551257	485465	47.49	0.607396				432261	488946	47.48	1.17072				444766	485799	47.49	1.09201
544742	490315	47.58	0.656522				549562	485745	47.59	0.615624				433126	489081	47.58	1.16684				441043	485924	47.59	1.1115
546436	490558	47.68	0.65065				548229	485723	47.69	0.620987				433787	489366	47.68	1.16472				438315	486204	47.69	1.12676
547706	490474	47.78	0.64504				546970	485326	47.79	0.624321				433519	489167	47.78	1.16519				436255	486213	47.79	1.1374
547921	489902	47.88	0.641531				546877	485456	47.89	0.625306				432422	488707	47.88	1.16878				434808	486161	47.89	1.14464
547769	489240	47.98	0.639112				546870	485469	47.99	0.625396				431636	489110	47.98	1.17473				433819	485882	47.99	1.14847
547893	489006	48.08	0.637526				547402	485573	48.09	0.623689				430010	488884	48.08	1.18218				433593	485585	48.09	1.14827
547788	488770	48.18	0.636871				548822	486022	48.2	0.619939				427915	488918	48.18	1.19333				435139	486117	48.19	1.14272
547624	488944	48.28	0.638346				549691	485702	48.3	0.614896				425030	488819	48.28	1.2081				436903	486337	48.29	1.13464
546754	489073	48.38	0.642518				551106	485810	48.4	0.609611				421632	488996	48.38	1.22697				439064	486306	48.39	1.12339
545464	489230	48.49	0.648556				552445	485700	48.5	0.60364				418101	489390	48.48	1.24771				441332	486222	48.49	1.11141
543856	489340	48.59	0.655706				554471	485954	48.59	0.596579				414092	489420	48.58	1.26953				444974	486509	48.59	1.09424
541728	489468	48.69	0.665117				556635	486015	48.69	0.588096				409147	489028	48.68	1.29477				448657	486383	48.69	1.07511
538616	489286	48.79	0.677245				558932	486080	48.79	0.579129				404301	488963	48.78	1.32128				452450	486288	48.79	1.05572
535236	489537	48.89	0.692566				560858	485849	48.89	0.570318				399054	488796	48.88	1.34991				456700	486304	48.89	1.03476
531798	489866	48.99	0.70858				563299	486073	48.99	0.561582				394985	489295	48.99	1.37527				460883	486390	48.99	1.01464
527617	489814	49.09	0.726104				565401	485843	49.09	0.552135				390405	488911	49.09	1.39975				465056	486451	49.09	0.994634
523325	489638	49.19	0.743677				567418	485710	49.19	0.543505				386743	489119	49.19	1.42192				468904	486462	49.19	0.97614
518473	489580	49.29	0.764373				570314	486327	49.3	0.534905				383063	489243	49.29	1.444				472917	486374	49.29	0.956555
513607	489486	49.39	0.785161				571927	486010	49.4	0.527082				380137	489597	49.39	1.46289				477018	486540	49.39	0.937892
509564	489825	49.49	0.804504				573614	485927	49.5	0.520069				377592	489227	49.49	1.4763				480767	486655	49.49	0.920807
506047	489907	49.59	0.820467				575587	486123	49.6	0.513249				376362	489289	49.59	1.48393				483984	486555	49.59	0.905336
502381	489718	49.69	0.835961				577390	486287	49.7	0.50697				375710	489303	49.69	1.4879				487175	486646	49.69	0.890968
499346	489626	49.79	0.849175				578946	486338	49.8	0.50115				376065	489614	49.79	1.4872				490144	486774	49.79	0.877886
497278	489900	49.89	0.859773				579798	485967	49.9	0.496123				376970	489601	49.89	1.48173				493270	487084	49.89	0.865012
495981	489835	49.99	0.865352				581156	486034	50	0.491168				379042	489739	49.99	1.47003				495127	486534	49.99	0.854013
495628	489816	50.09	0.866867				582217	486067	50.1	0.487216				381521	489693	50.09	1.45515				497539	486974	50.1	0.845111
495702	489770	50.19	0.86632				583130	486137	50.2	0.484014				385146	489925	50.19	1.43494				499211	486958	50.2	0.837487
496377	490035	50.29	0.864475				583614	486005	50.3	0.481536				389170	490437	50.29	1.41389				500412	486895	50.3	0.831788
497374	489852	50.39	0.859118				584236	486171	50.4	0.479907				393254	490240	50.39	1.3895				501488	486860	50.4	0.826793
499136	490058	50.49	0.852106				584886	486551	50.5	0.479163				397322	489631	50.49	1.36354				502526	487178	50.5	0.823609
501583	490203	50.59	0.841766				585084	486580	50.6	0.478536				402333	489491	50.59	1.33469				503096	487275	50.6	0.821506
503785	489755	50.69	0.829851				584701	486376	50.7	0.479066				407766	489980	50.69	1.30675				502509	486937	50.7	0.822572
507085	489637	50.79	0.814615				584407	486391	50.8	0.480267				413496	489870	50.79	1.27484				501673	486756	50.8	0.825482
511089	490244	50.89	0.799703				583973	486302	50.9	0.481527				419097	489880	50.89	1.24461				501023	486961	50.9	0.829347
514759	490343	50.99	0.784056				583441	486249	51	0.483333				424222	489750	50.99	1.21666				499760	486795	51	0.83426
518567	490551	51.09	0.768423				582588	486078	51.1	0.485834				429369	489817	51.09	1.18983				498520	487177	51.1	0.841616
522449	490468	51.19	0.751259				581890	486201	51.2	0.489101				434844	489862	51.19	1.16152				496492	487247	51.2	0.851113
526145	490434	51.29	0.735238				580782	486107	51.3	0.492955				439979	490120	51.29	1.13629				494397	487294	51.3	0.860846
529397	490292	51.39	0.72072				580312	486491	51.4	0.496554				444584	490290	51.39	1.11364				492383	487372	51.4	0.870393
532076	489817	51.49	0.707179				579850	486723	51.5	0.499419				448638	490201	51.49	1.0928				490482	487571	51.5	0.880017
535105	489635	51.59	0.693568				579472	486918	51.6	0.501788				452020	489841	51.59	1.07424				488618	487714	51.6	0.889245
538506	489947	51.69	0.680743				578296	486466	51.7	0.50427				455386	489819	51.69	1.05745				486709	487683	51.7	0.897912
541365	489698	51.79	0.667683				578276	486824	51.8	0.506003				459060	490171	51.79	1.04098				485539	488040	51.8	0.904975
544753	490308	51.89	0.656445				578350	486990	51.9	0.506483				461640	490146	51.89	1.02825				484655	488213	51.9	0.909873
547003	490103	51.99	0.646228				578363	486889	52	0.505965				463604	490162	51.99	1.01877				483785	487992	52	0.912898
548851	489982	52.09	0.638082				578964	487240	52.1	0.50525				465310	490064	52.09	1.01006				482898	487822	52.1	0.916244
550672	489685	52.19	0.629263	8	0.929		578891	486986	52.2	0.50436	8	0.93		466953	490173	52.19	1.00263	8	0.93		481822	486856	52.2	0.916803	8	0.93
552851	489987	52.29	0.621763				579722	487239	52.3	0.502301				468566	490490	52.29	0.99632				482506	487117	52.3	0.914817
553877	489717	52.39	0.61635				580825	487667	52.4	0.499999				468812	490175	52.39	0.993693				483432	487180	52.4	0.910793
554950	489791	52.49	0.612335				581447	487398	52.5	0.496349				468970	490002	52.49	0.992141				484677	487307	52.5	0.905591
555561	489719	52.59	0.609528				582181	487309	52.6	0.493099				469132	490299	52.59	0.992727				486210	487392	52.6	0.898877
556529	490194	52.69	0.607792				583498	487625	52.7	0.489472				469012	490496	52.69	0.994207				488019	487443	52.7	0.890755
556930	490241	52.79	0.606387				584597	487641	52.8	0.485311				468045	490231	52.79	0.997635				490306	487643	52.8	0.881157
556899	490024	52.89	0.605516				585785	487627	52.9	0.480678				467336	490481	52.89	1.00219				492424	487514	52.9	0.870861
556342	489764	52.99	0.606573				586289	487014	53.01	0.475912				465660	490516	52.99	1.01044				494501	487325	53	0.860516
555488	489531	53.09	0.608959				586684	486367	53.11	0.471405				464176	490807	53.09	1.01896				497212	487656	53.1	0.84974
555200	490042	53.19	0.612474				587830	486493	53.21	0.467596				461741	490521	53.19	1.02948				499723	487824	53.21	0.839179
554233	490223	53.3	0.617228				588881	486582	53.31	0.463988				459779	490632	53.29	1.03957				502128	488004	53.31	0.829204
553219	490263	53.4	0.621533				589517	486314	53.41	0.460318				458154	490771	53.39	1.04818				504621	488098	53.41	0.818492
551855	490121	53.5	0.626437				591365	487141	53.51	0.457099				456583	490835	53.49	1.0562				506428	487977	53.51	0.80989
550598	490280	53.6	0.632298				591870	486761	53.61	0.453422				454935	490815	53.59	1.06425				508262	487803	53.61	0.800953
549250	490319	53.7	0.637994				592790	486784	53.71	0.450033				453319	490500	53.7	1.07081				510613	488096	53.71	0.791918
547682	489974	53.8	0.642844				593399	486638	53.81	0.447047				452415	490560	53.8	1.07558				512078	487896	53.81	0.784549
546433	489885	53.9	0.647573				593980	486573	53.91	0.444544				452005	490724	53.9	1.07837				513591	487938	53.91	0.778103
545671	490292	54	0.652582				594760	486773	54.01	0.442515				451677	490573	54	1.07931				514816	487908	54.01	0.772603
544174	489882	54.1	0.656882				595142	486828	54.11	0.441325				451954	490893	54.1	1.0794				516180	488254	54.11	0.768244
543121	489697	54.2	0.660391				595758	487087	54.21	0.440193				452170	490655	54.2	1.07723				516767	488064	54.21	0.76481
542727	489843	54.3	0.662695				595876	487005	54.31	0.439369				453094	490684	54.3	1.07277				516497	487304	54.31	0.762479
542838	490042	54.4	0.663148				595751	486738	54.41	0.438607				454569	490657	54.4	1.06534				516820	487439	54.41	0.761696
542994	489999	54.5	0.662304				595952	486866	54.51	0.438439				456543	490760	54.5	1.05606				516971	487714	54.51	0.762308
543020	489756	54.6	0.66108				596175	487012	54.61	0.438272				458756	490830	54.6	1.0455				516809	487849	54.61	0.763636
543556	489742	54.7	0.658796				596316	487071	54.71	0.438013				461247	490885	54.7	1.03356				516787	488087	54.71	0.764829
544833	489942	54.8	0.654434				596005	486771	54.81	0.4378				463837	490813	54.8	1.02063				516607	488359	54.81	0.766867
546087	489992	54.9	0.64949				596008	486805	54.91	0.437946				467290	491457	54.9	1.00689				515447	488130	54.91	0.77087
547411	490008	55	0.644114				596280	487132	55.02	0.43843				470317	491467	55	0.992404				514721	488415	55.01	0.775356
548728	489970	55.1	0.638531				596546	487458	55.12	0.438932				473549	491721	55.1	0.978155				513845	488329	55.11	0.778793
550169	489861	55.2	0.632128				595999	487062	55.22	0.439168				476607	491857	55.2	0.964292				512926	488109	55.21	0.781807
552179	490212	55.31	0.625534				596106	487176	55.32	0.43929				479135	491645	55.3	0.951417				512282	488315	55.31	0.785584
554317	490565	55.41	0.618457				595876	487047	55.42	0.439563				481785	491447	55.4	0.938098				511035	487929	55.41	0.789289
555718	490309	55.51	0.611602				595566	486665	55.52	0.438968				484632	491550	55.5	0.92531				510445	488021	55.51	0.792313
557108	490043	55.61	0.604758				596089	487008	55.62	0.438578				487192	491643	55.6	0.913879				509953	487898	55.61	0.793916
559423	490603	55.71	0.597997				596434	486957	55.72	0.437041				489273	491318	55.7	0.902799				509911	487869	55.71	0.793968
560792	490303	55.81	0.59112				596600	486810	55.81	0.435735				491150	491228	55.8	0.89377				509935	487826	55.81	0.793663
562697	490552	55.91	0.58463				596879	486719	55.91	0.434262				492778	490930	55.9	0.884957				510021	487933	55.91	0.793777
565049	491297	56.01	0.578659				597869	487286	56.02	0.433153				494008	490605	56	0.877857				510205	487888	56.01	0.792758
566420	491310	56.11	0.573264				597993	487135	56.12	0.431988				495520	490772	56.1	0.871745				510654	487987	56.11	0.791235
567186	491024	56.21	0.568913				598695	487537	56.22	0.431204				497000	491330	56.2	0.867591				511472	488198	56.21	0.788606
568292	491120	56.31	0.564969				599224	487594	56.32	0.42948				497373	490870	56.3	0.863795				512279	488062	56.31	0.784431
568860	490817	56.41	0.561332				599314	487306	56.42	0.427812				498101	491101	56.4	0.861562				513400	488129	56.41	0.779821
569222	490505	56.51	0.558469				600180	487669	56.52	0.426239				498872	491470	56.5	0.859772				514710	488349	56.51	0.7751
569948	490510	56.61	0.555624				600382	487382	56.62	0.424157				498658	490938	56.6	0.8583				515811	488117	56.61	0.769222
570903	490748	56.71	0.552948				600829	487294	56.72	0.422075				498862	490997	56.7	0.85765				516999	487900	56.71	0.763044
570991	490425	56.81	0.551119				601025	487130	56.82	0.420584				498722	491074	56.8	0.858634				518218	488044	56.81	0.758408
571516	490754	56.91	0.55056				601467	487174	56.92	0.419133				498279	491000	56.9	0.860295				518946	487768	56.91	0.753976
572122	491161	57.01	0.550041				602297	487562	57.02	0.417821				497741	490995	57	0.862703				520151	488007	57.01	0.749859
571409	490529	57.11	0.549949				602910	487849	57.12	0.416856				497014	490825	57.1	0.865213				521526	488240	57.11	0.744992
571625	490778	57.21	0.550241				603012	487777	57.22	0.416143				496371	490829	57.2	0.868145				522797	488551	57.21	0.740947
571373	490685	57.31	0.550807				603405	487900	57.32	0.415244				496092	491100	57.31	0.870653				523183	488321	57.31	0.738226
571692	491084	57.41	0.55138				603854	488165	57.42	0.414792				495807	491403	57.41	0.873334				523678	488313	57.41	0.736061
571349	490904	57.51	0.551905				604452	488510	57.52	0.414155				495186	491311	57.51	0.875733				523959	487980	57.51	0.733319
572001	491421	57.61	0.551708				604458	488362	57.62	0.41345				495034	491378	57.61	0.876731				524932	488417	57.61	0.731158
571901	491262	57.71	0.551373				604836	488569	57.72	0.412997				494997	491462	57.7	0.877284				525301	488515	57.72	0.730028
571707	491098	57.81	0.551385				604235	488093	57.82	0.413041				495329	491803	57.81	0.877336				524874	488258	57.82	0.730674
571771	491332	57.91	0.552205				604341	488238	57.92	0.413315				495158	491697	57.91	0.877628				524648	488278	57.92	0.731735
571501	491135	58.01	0.552365				604073	488036	58.02	0.413382				495004	491413	58	0.877027				525256	488747	58.02	0.73129
571571	491107	58.11	0.551962				604249	488314	58.12	0.414008				495310	491491	58.1	0.875994				524897	488483	58.12	0.731612
571600	491053	58.21	0.5516				604739	488741	58.22	0.41415				495605	491233	58.2	0.873472				524563	488391	58.22	0.732621
572556	491659	58.31	0.550615				604357	488473	58.32	0.414338				496379	491248	58.31	0.870029				524132	488235	58.32	0.733752
572603	491519	58.41	0.549789				603503	487835	58.42	0.414579				497131	491201	58.41	0.866407				523653	487904	58.42	0.734283
573081	491642	58.51	0.548474				603464	487752	58.52	0.414342				497779	490842	58.51	0.86183				524036	488197	58.52	0.733989
573635	491441	58.61	0.54538				603323	487468	58.62	0.413557				498739	490681	58.61	0.856756				524517	488583	58.62	0.733703
574646	491747	58.71	0.542818	9	0.93		603350	487439	58.72	0.413322	9	0.929		500633	491334	58.71	0.851219	9	0.929		524605	488655	58.72	0.733657	9	0.929
575319	491731	58.81	0.54011				604132	487998	58.82	0.412987				501520	490937	58.81	0.845416				524279	488193	58.82	0.732927
575647	491511	58.91	0.537821				603782	487745	58.92	0.413124				503574	491735	58.91	0.839873				524569	488324	58.92	0.732286
576278	491544	59.01	0.535506				603807	487900	59.02	0.413746				504423	491555	59.01	0.835258				524695	488212	59.02	0.73123
576966	491689	59.11	0.533485				603578	487746	59.12	0.413889				505535	491514	59.11	0.830115				525429	488568	59.12	0.729724
577911	491859	59.21	0.53058				603862	487934	59.22	0.413697				506428	491369	59.21	0.825479				526074	488610	59.22	0.727157
578718	491975	59.31	0.52797				603919	487846	59.32	0.413079				507585	491602	59.31	0.821411				526433	488434	59.32	0.724811
578960	491531	59.41	0.524998				604171	487882	59.42	0.412306				508951	491912	59.41	0.816781				527325	488564	59.42	0.7216
579863	491565	59.51	0.521646				604871	488132	59.52	0.410853				509776	491768	59.51	0.812477				528332	488661	59.52	0.717753
580553	491497	59.61	0.518658				604502	487766	59.62	0.410539				510258	491594	59.61	0.809554				529018	488728	59.62	0.715141
581286	491735	59.71	0.516908				604464	487732	59.73	0.410523				510839	491674	59.71	0.807359				529177	488483	59.72	0.713337
581704	491756	59.82	0.515387				604006	487369	59.83	0.410553				511324	491806	59.81	0.805828				529921	488740	59.82	0.711359
582219	491949	59.92	0.514278				603776	487299	59.93	0.411087				511512	491908	59.91	0.805467				530647	488888	59.92	0.708959
582510	492046	60.02	0.513597				603401	487187	60.03	0.411968				511409	491890	60.01	0.805838				530609	489035	60.02	0.709797
582717	492052	60.12	0.512825				603831	487590	60.13	0.412226				511106	491769	60.11	0.806618				531131	488797	60.12	0.706488
583327	492317	60.22	0.511682				603998	487824	60.23	0.412683				510697	491664	60.21	0.807939				531536	488851	60.22	0.705022
582875	492088	60.32	0.51238				603998	487830	60.33	0.412711				510337	491725	60.31	0.809805				532645	489654	60.32	0.704025
582919	491807	60.42	0.510924				603829	487711	60.43	0.412792				509859	491611	60.41	0.811392				532773	489416	60.42	0.70239
583137	491794	60.52	0.510023				604036	487785	60.53	0.412362				509552	491667	60.51	0.813004				532981	489303	60.53	0.700992
582926	491657	60.62	0.510211				604072	487917	60.63	0.412836				509597	492137	60.61	0.814956				532622	489097	60.63	0.70156
583582	492288	60.72	0.510566				603923	487801	60.73	0.412857				508786	491727	60.71	0.816664				532942	489269	60.73	0.701
582643	491635	60.82	0.511203				603703	487745	60.83	0.413418				508102	491563	60.81	0.818941				532980	489172	60.83	0.700393
583081	492010	60.92	0.511228				603381	487673	60.93	0.414287				508361	492158	60.91	0.820516				533705	489507	60.93	0.698875
583092	492162	61.02	0.51188				603974	488347	61.03	0.415184				507896	492047	61.01	0.822068				533734	489515	61.03	0.698789
582772	491921	61.12	0.512014				603789	488327	61.13	0.415781				507665	492077	61.11	0.823229				533751	489326	61.13	0.697849
582353	491784	61.22	0.513005				603996	488632	61.23	0.416415				507007	491726	61.21	0.824542				533968	489364	61.23	0.697109
582822	492315	61.32	0.513622				603618	488537	61.33	0.417386				506804	491723	61.32	0.82543				534179	489239	61.33	0.695645
582721	492090	61.42	0.512984				603775	488512	61.43	0.416686				506882	491615	61.42	0.824589				534804	489121	61.43	0.69247
583369	492361	61.52	0.511721				603668	488367	61.53	0.416417				507403	492025	61.52	0.824153				535437	489258	61.53	0.690439
583361	492371	61.62	0.511798				603809	488424	61.63	0.416154				507720	492095	61.62	0.823068				535728	489153	61.63	0.688733
583332	492303	61.72	0.511599				603699	488522	61.73	0.417015				507814	492214	61.72	0.823195				536069	489158	61.73	0.687324
582822	491889	61.82	0.511674				603373	488459	61.83	0.417941				507893	492008	61.82	0.821903				536351	489139	61.83	0.686053
582464	491741	61.92	0.51238				603206	488725	61.93	0.419789				508236	492292	61.92	0.821683				536898	489358	61.93	0.684766
582826	491984	62.02	0.512093				603129	488684	62.03	0.419887				508649	492308	62.02	0.819928				537294	489148	62.03	0.682141
582820	491853	62.12	0.511517				603011	488743	62.13	0.420599				508747	492090	62.12	0.818497				537745	489152	62.13	0.680271
583231	492056	62.22	0.510859				603306	488921	62.23	0.420318				509449	492323	62.22	0.81646				538210	489156	62.23	0.678344
584148	492687	62.32	0.510208				603474	488960	62.33	0.419871				509838	492224	62.32	0.814289				538828	489058	62.33	0.675311
584519	492609	62.42	0.508423				603363	488808	62.43	0.419585				510480	492459	62.42	0.812531				539521	489124	62.43	0.672722
584016	492130	62.52	0.508171				602911	488566	62.53	0.420157				510646	492453	62.52	0.811772				539665	489142	62.53	0.672204
584173	492227	62.62	0.508009				602760	488450	62.64	0.420187				510968	492656	62.62	0.811281				540365	489448	62.63	0.670695
584128	492281	62.72	0.50843				602349	488230	62.74	0.420708				510851	492510	62.72	0.81113				540764	489450	62.73	0.669043
583823	492245	62.82	0.50944				602585	488659	62.84	0.421803				510647	492337	62.82	0.811238				541656	489797	62.83	0.666929
583929	492422	62.93	0.509841				602609	488823	62.94	0.422468				510681	492463	62.92	0.811664				542157	489858	62.93	0.665128
583801	492401	63.03	0.510238				601985	488267	63.04	0.422239				510157	492070	63.02	0.812177				542121	489416	63.03	0.663246
583664	492398	63.13	0.510753				602312	488524	63.14	0.422201				509720	491690	63.12	0.812367				542475	489183	63.13	0.660706
584052	492659	63.23	0.51045				602394	488448	63.24	0.421544				509744	491714	63.22	0.812371				543785	489529	63.23	0.656869
583988	492628	63.33	0.510555				602322	488403	63.34	0.421606				509816	491799	63.32	0.812442				544753	489550	63.33	0.652963
584385	492748	63.43	0.509574				602618	488404	63.44	0.420505				510219	492047	63.42	0.811799				545636	489509	63.43	0.64913
584808	492945	63.53	0.508845				604052	489147	63.54	0.418577				510922	492529	63.52	0.810904				546621	489603	63.53	0.645503
584178	492491	63.63	0.509197				603913	488876	63.64	0.417848				510525	492192	63.62	0.811113				547376	489603	63.63	0.642397
584169	492550	63.73	0.509501				604393	488437	63.74	0.414038				510369	491678	63.72	0.809449				548551	489732	63.73	0.638164
584274	492719	63.83	0.509869				604490	488445	63.84	0.413714				510496	491744	63.82	0.809191				548611	489294	63.83	0.635904
583730	492348	63.93	0.51027				604771	488565	63.94	0.413221				511429	492350	63.92	0.807854				549269	489313	63.93	0.633294
583724	492283	64.03	0.509996				605273	488756	64.04	0.412233				511792	492382	64.02	0.806403				550347	489519	64.03	0.629829
583769	492364	64.13	0.510193				605311	488638	64.14	0.411548				511971	492132	64.12	0.804473				550977	489407	64.13	0.626739
584182	492813	64.23	0.510652				605666	488776	64.24	0.410864				512651	492264	64.22	0.80209				552060	489571	64.23	0.623074
584520	492698	64.33	0.508825				606223	488789	64.34	0.408856				513441	492321	64.32	0.798885				553560	489861	64.33	0.6183
584898	492699	64.43	0.507375				606841	488849	64.44	0.406839				513912	492206	64.42	0.796296				554495	489857	64.43	0.614484
585287	492655	64.53	0.505678				607508	488939	64.54	0.404781				514825	492476	64.52	0.793535				555639	490095	64.53	0.610939
585477	492827	64.63	0.505733				607715	488960	64.64	0.404111				515134	492469	64.62	0.792153				555829	489890	64.63	0.609228
585343	492868	64.73	0.506435				607376	489015	64.74	0.40562				515436	492462	64.72	0.790802				555784	489889	64.73	0.609406
585730	493497	64.83	0.507818				606836	488812	64.84	0.406687				515649	492400	64.82	0.789589				555699	489756	64.83	0.609139
585807	493431	64.93	0.507221				606972	488891	64.94	0.406546				515890	492085	64.93	0.787097				555942	489712	64.93	0.607953
585441	493043	65.03	0.506858				607036	488842	65.04	0.406084				516681	492321	65.03	0.784729				556572	489789	65.03	0.605758
585760	493010	65.13	0.505481				607710	489073	65.14	0.40465	10	0.915		517530	492470	65.13	0.781715				557536	490054	65.13	0.603081	10	0.915
586284	492896	65.23	0.502948	10	0.929		608273	488980	65.24	0.402138				518294	492334	65.23	0.777773	10	0.929		558492	489821	65.23	0.598155
586843	492900	65.33	0.500822				608969	489314	65.34	0.401101				518871	492405	65.33	0.775594				559418	489820	65.34	0.594422
586889	492652	65.43	0.499513				609605	489523	65.44	0.399713				519706	492493	65.43	0.772377				560074	489871	65.44	0.592019
587511	492980	65.53	0.498627				609561	489294	65.54	0.398822				520132	492428	65.53	0.770236				560612	489801	65.54	0.589537
587384	492637	65.63	0.497547				609853	489233	65.64	0.397464				520609	492206	65.63	0.767159				561412	489853	65.64	0.586566
587507	492602	65.73	0.496916				609601	488970	65.74	0.397184				521401	492527	65.73	0.765205				562126	489746	65.74	0.583215
587586	492648	65.83	0.496824				609398	488765	65.84	0.39699				521694	492219	65.83	0.762533				563098	489833	65.84	0.579726
587737	492434	65.93	0.495268				609791	488810	65.94	0.395746				522898	492552	65.92	0.758867				563967	489668	65.94	0.575498
588839	492552	66.03	0.491591				610581	488966	66.04	0.39355				524254	492866	66.03	0.754473				565407	489886	66.04	0.570761
590301	492514	66.13	0.485837				611587	489324	66.14	0.391493				525033	492586	66.13	0.749853				566601	489805	66.14	0.565641
591722	492790	66.24	0.481687				612238	489250	66.25	0.388758				526271	492702	66.23	0.745082				568317	490087	66.24	0.560131
592181	492749	66.34	0.479755				612848	489339	66.35	0.386926				526878	492534	66.33	0.741721				569681	490255	66.34	0.555508
592718	492593	66.44	0.477002				613338	489089	66.45	0.383978				528313	492677	66.43	0.736253				570529	490060	66.44	0.551265
594002	493104	66.54	0.474466				613674	489166	66.55	0.3831				528866	492424	66.53	0.732743				571633	490151	66.54	0.547332
594755	493217	66.64	0.47213				613808	488975	66.65	0.381729				530181	492656	66.63	0.728214				572842	490294	66.64	0.543234
594691	493072	66.74	0.471711				614362	489343	66.75	0.381392				531002	492734	66.73	0.725088				573466	490106	66.74	0.539921
594595	492863	66.84	0.47112				614745	489289	66.85	0.379741				532033	492690	66.83	0.720522				574537	490060	66.84	0.535511
594749	492904	66.94	0.470725				615470	489451	66.95	0.377834				533294	492798	66.93	0.715688				575464	489943	66.94	0.531345
593866	492456	67.04	0.472022				615349	489259	67.05	0.377393				534211	492753	67.03	0.711616				576063	489781	67.04	0.52826
594295	493240	67.14	0.473977				615227	489093	67.15	0.377076				535027	492606	67.13	0.70751				576838	489862	67.14	0.525607
595663	493968	67.24	0.472121				615708	489107	67.25	0.375381				536104	492408	67.23	0.702079				578003	490078	67.24	0.522058
596354	493946	67.34	0.469412				616090	488921	67.35	0.37313				537319	492277	67.33	0.696386				578731	490056	67.34	0.519124
596405	493388	67.44	0.466676				616894	489135	67.45	0.37118				539106	492681	67.43	0.69076				579333	489970	67.44	0.51639
597371	493655	67.54	0.464251				617727	489148	67.55	0.368203				540787	492997	67.53	0.685197				580067	489830	67.54	0.512897
597687	493609	67.64	0.462851				617665	489193	67.65	0.368636				541254	492795	67.63	0.682332				580583	489951	67.64	0.511452
598008	493902	67.74	0.462979				616423	489277	67.75	0.373552				542099	492543	67.73	0.67767				580749	490152	67.74	0.511732
598555	493906	67.84	0.460939				615758	489295	67.85	0.376064				543583	492945	67.83	0.673354				581014	490564	67.84	0.512596
599277	493901	67.94	0.458204				617505	489434	67.95	0.370327				545192	493036	67.93	0.667118				581349	490789	67.94	0.512331
599552	493382	68.04	0.454805				619172	489171	68.05	0.36305				546493	492896	68.03	0.661115				581568	490547	68.04	0.510373
600844	493591	68.14	0.450914				621080	489283	68.15	0.356641				547716	492795	68.13	0.655623				582444	490376	68.14	0.506201
601649	493692	68.24	0.448361				621813	489206	68.25	0.353633				548571	492864	68.23	0.652428				583215	490235	68.24	0.502577
602515	494044	68.34	0.446728				622355	489236	68.35	0.35181				550120	492834	68.33	0.645946				583018	490107	68.34	0.50275
603334	494097	68.44	0.443913				622717	489404	68.45	0.351274				552285	492951	68.43	0.637641				582258	489527	68.44	0.503021
603836	493842	68.54	0.440879				622540	489313	68.55	0.351495				553914	493023	68.53	0.631341				583255	489976	68.54	0.501234
604628	493922	68.64	0.438294				622213	489412	68.65	0.353133				554621	492941	68.63	0.628096				583642	489920	68.64	0.499484
605426	493990	68.74	0.435636				622209	489488	68.75	0.353497				555932	493001	68.73	0.623057				583914	489772	68.74	0.497755
606446	493875	68.84	0.431323				622365	489581	68.85	0.35336				557143	492869	68.83	0.617558				584558	489722	68.84	0.495045
607685	493974	68.94	0.427181				623460	490227	68.95	0.352372				558696	493012	68.93	0.611946				585337	489825	68.95	0.492521
609174	494072	69.04	0.42212				622990	489680	69.05	0.351557				560276	493125	69.03	0.606107				585853	489931	69.05	0.491025
610936	494237	69.14	0.416372				622802	489224	69.15	0.350139				561408	493035	69.13	0.601154				585867	490069	69.15	0.491605
611744	493971	69.24	0.412186				623258	488988	69.25	0.347406				562180	492830	69.23	0.597125				586115	490082	69.25	0.490712
612101	493807	69.34	0.410126				624188	489235	69.35	0.345187				563382	493169	69.33	0.593866				586472	490153	69.35	0.489668
610972	493710	69.44	0.413838				624868	489431	69.46	0.343638				564070	493249	69.43	0.591485				586743	490265	69.45	0.489143
608839	493446	69.54	0.420505				624786	489282	69.56	0.343248				564177	492970	69.53	0.589785				586456	489797	69.55	0.488094
606640	493350	69.64	0.42821				625191	489479	69.66	0.342696				564852	492996	69.64	0.587212				587018	490248	69.65	0.48801
606123	493478	69.75	0.430713				625159	489362	69.76	0.342273				565607	492927	69.74	0.583891				587576	490517	69.75	0.487106
605761	493287	69.85	0.431186				625510	489415	69.86	0.341254				566156	492701	69.84	0.580676				587845	490397	69.85	0.485526
606058	493447	69.95	0.430813				626072	489677	69.96	0.340437				567053	492794	69.94	0.577538				587622	489920	69.95	0.484189
606778	493618	70.05	0.42892				626457	489754	70.06	0.339407				568085	492714	70.04	0.573081				588166	490025	70.05	0.482589
607947	493794	70.15	0.425391				626589	489639	70.16	0.338405				569770	493294	70.14	0.569063				588440	490021	70.15	0.481523
609263	493968	70.25	0.421318				626466	489357	70.26	0.33755				570875	493219	70.24	0.564361				588850	490040	70.25	0.480043
610191	493912	70.35	0.417638				626275	489041	70.36	0.336783				572068	493287	70.34	0.559973				588832	489691	70.35	0.478508
610793	493738	70.45	0.414626				626669	489319	70.46	0.336646				572493	493242	70.44	0.558096				589288	489828	70.45	0.477396
610763	493478	70.55	0.413551				626898	489443	70.56	0.336394				572729	492927	70.54	0.555731				589258	489696	70.55	0.476904
611257	493713	70.65	0.412803				627198	489727	70.66	0.336623				574854	493537	70.64	0.55018				589430	489759	70.65	0.476536
611415	493689	70.75	0.412112				627160	489607	70.76	0.336208				574960	493193	70.74	0.548196				589428	489572	70.75	0.475685
611079	493152	70.85	0.410899				627145	489504	70.86	0.335788				574833	492465	70.84	0.545369				589809	489648	70.85	0.47458
610967	492803	70.95	0.409719				627422	489524	70.96	0.334886				576288	492853	70.94	0.541452				590479	489857	70.95	0.472985
611803	493002	71.05	0.40755				627848	489591	71.06	0.333667				576233	492323	71.04	0.539246				591027	489834	71.05	0.470792
612164	492992	71.15	0.406177				628147	489520	71.16	0.332269				576282	492409	71.14	0.539447				591157	489550	71.15	0.468992
612718	493235	71.25	0.40525				628482	489505	71.26	0.331				575761	492375	71.24	0.541327				592177	490064	71.25	0.467474
612470	492834	71.35	0.404331				628817	489502	71.36	0.329787				575432	492144	71.34	0.541558				592994	490425	71.35	0.466028
612446	492620	71.45	0.403442				628819	489270	71.46	0.328713				576091	492663	71.44	0.541354				593172	490231	71.45	0.464462
612457	492561	71.55	0.403132				628812	489144	71.56	0.328159				576431	492726	71.54	0.540314				593931	490544	71.55	0.463021
612792	492778	71.65	0.402892	11	0.916		629900	489883	71.66	0.327666	11	0.93		576991	492830	71.64	0.538604				594178	490433	71.65	0.461576	11	0.929
613303	492995	71.75	0.402007				629801	489651	71.76	0.326953				577518	492889	71.74	0.536819	11	0.929		594595	490468	71.75	0.460158
613491	492921	71.85	0.40098				629923	489608	71.86	0.32632				578096	493000	71.84	0.535074				594398	489899	71.85	0.458291
614054	493145	71.95	0.399938				629929	489394	71.96	0.325314				578383	492914	71.94	0.533565				594994	489924	71.95	0.456151
614540	493220	72.05	0.3985				630254	489468	72.06	0.324494				578852	492994	72.04	0.532106				595352	489835	72.05	0.454388
614807	493075	72.15	0.396861				630775	489608	72.16	0.323278				579170	492881	72.14	0.530354				595958	490189	72.15	0.453724
615351	493144	72.25	0.395185				630991	489667	72.26	0.322779				579422	492935	72.24	0.529621				596286	490391	72.25	0.453413
616122	493538	72.35	0.394164				631028	489608	72.36	0.322376				579511	492896	72.34	0.529098				596424	490379	72.35	0.452838
615987	493264	72.45	0.393408				630957	489532	72.46	0.322279				579774	493067	72.44	0.528857				596299	490268	72.45	0.4528
616484	493485	72.55	0.392601				630612	489231	72.56	0.322126				580048	493208	72.54	0.528437				596647	490307	72.55	0.451666
617008	493591	72.65	0.391172				630982	489463	72.66	0.321873				580026	493088	72.64	0.527975				597225	490405	72.65	0.449937
617356	493390	72.75	0.388987				631429	489824	72.76	0.321939				580116	493040	72.75	0.527407				597496	490305	72.75	0.448457
617741	493277	72.85	0.387068				630953	489410	72.86	0.321733				580195	492812	72.85	0.526059				597766	490192	72.85	0.446921
618602	493695	72.96	0.38584				631045	489534	72.96	0.321975				580501	492745	72.95	0.524567				598281	490166	72.95	0.444864
618639	493642	73.06	0.385464				630848	489286	73.06	0.321537				581057	492872	73.05	0.522992				598986	490409	73.05	0.443329
617925	493301	73.16	0.386508				630757	489189	73.16	0.321416				581596	492932	73.15	0.52118				598893	490092	73.15	0.442223
617715	493103	73.26	0.386369				630758	489075	73.26	0.320887				582496	493311	73.25	0.51943				599166	490079	73.25	0.441138
618879	493170	73.36	0.382438				631082	489263	73.36	0.320597				582563	493174	73.35	0.518546				599063	489826	73.35	0.440363
620493	493491	73.46	0.378041				631259	489307	73.46	0.320168				582184	492756	73.45	0.518102				599468	490043	73.45	0.439839
620628	493066	73.56	0.375613				631283	489317	73.56	0.320128				582810	493186	73.55	0.517647				599830	490142	73.55	0.438935
620799	493113	73.66	0.375207				631917	489780	73.66	0.319998				582691	492976	73.65	0.517148				600068	490102	73.65	0.437858
620966	493115	73.76	0.374611				631994	489792	73.76	0.319779				582825	492908	73.75	0.51632				599897	489746	73.76	0.436864
621280	493069	73.86	0.373263				631934	489580	73.86	0.319018				583248	492798	73.85	0.514185				600350	489859	73.86	0.435685
621620	492985	73.96	0.371649				631707	489263	73.96	0.318369				584108	493092	73.95	0.512211				600801	489919	73.96	0.434271
621834	492868	74.06	0.37034				631831	489177	74.06	0.317532				584737	493211	74.05	0.510332				601632	490309	74.06	0.432951
622386	493077	74.16	0.369297				632283	489377	74.16	0.316842				584537	492724	74.15	0.508879				601676	490072	74.16	0.431698
623326	493605	74.26	0.368309				632711	489610	74.27	0.316391				585054	493041	74.25	0.508337				601597	490160	74.26	0.432398
623335	493413	74.36	0.367401				632645	489488	74.37	0.316065				585131	493012	74.35	0.507908				602177	490280	74.36	0.43078
622774	492824	74.46	0.36674				632329	489197	74.47	0.315851				585147	492909	74.45	0.507376				602470	490192	74.46	0.429281
622972	492926	74.56	0.36649				633052	489728	74.57	0.31572				585299	492886	74.55	0.506687				602310	490163	74.56	0.429746
623599	493335	74.66	0.366093				632401	489212	74.67	0.315663				586124	493375	74.65	0.505749				602803	490296	74.66	0.428515
623741	493346	74.76	0.36563				632461	489208	74.77	0.315432				586665	493534	74.75	0.504397				603192	490401	74.76	0.427545
624018	493441	74.86	0.365065				633299	489746	74.87	0.314925				587286	493709	74.85	0.502814				603297	490343	74.86	0.426887
623979	493276	74.96	0.364453				633250	489595	74.97	0.314405				587935	493956	74.95	0.501454				603157	490071	74.96	0.426161
624281	493287	75.06	0.363414				633759	489855	75.07	0.313792				588120	493762	75.05	0.499862				603105	489891	75.06	0.425528
624630	493394	75.16	0.362644				633264	489384	75.17	0.313386				588001	493462	75.15	0.49895				603205	489931	75.16	0.425339
624282	492990	75.26	0.362055				633444	489404	75.27	0.312838				588104	493340	75.25	0.497999				603749	490242	75.26	0.424738
624382	492990	75.36	0.361694				632889	488850	75.37	0.312262				588353	493327	75.35	0.496987				603458	489896	75.36	0.424234
624741	493215	75.46	0.361428				633258	488971	75.47	0.311507				588590	493366	75.45	0.496259				604056	490297	75.46	0.423847
625133	493376	75.56	0.360751				633597	489182	75.57	0.311273				588629	493260	75.55	0.495626				604175	490452	75.56	0.424115
625388	493498	75.66	0.360389				633288	488928	75.67	0.311202				589045	493560	75.65	0.495405				604089	490372	75.66	0.424068
625111	493262	75.76	0.36031				633407	489003	75.77	0.311125				589248	493532	75.75	0.494502				604308	490466	75.76	0.423684
624871	493003	75.86	0.359992				633579	489072	75.87	0.310831				589293	493309	75.85	0.493313				604293	490334	75.86	0.423134
625118	493111	75.96	0.359596				633173	488695	75.97	0.310538				589765	493423	75.95	0.492031				604089	490075	75.96	0.422705
625238	493126	76.06	0.359232				633335	488766	76.07	0.31029				590224	493533	76.05	0.490782				604408	490233	76.06	0.422242
625301	493040	76.16	0.358613				633542	488889	76.17	0.31012				590684	493665	76.15	0.48963				604368	490185	76.16	0.422171
625317	492947	76.26	0.358131				633444	488788	76.27	0.310004				591232	493941	76.25	0.488801				604423	490200	76.26	0.422035
625332	492891	76.36	0.357821				633540	488819	76.37	0.309805				591406	493937	76.35	0.488121				604236	490067	76.36	0.42212
625395	492942	76.46	0.357827				634093	489235	76.47	0.309756				591171	493638	76.45	0.487653				604902	490569	76.46	0.421945
625373	492873	76.57	0.357591				633529	488833	76.57	0.309909				590958	493410	76.55	0.487424				604621	490222	76.56	0.421399
625803	493224	76.67	0.357647				633505	488834	76.67	0.309999				590367	492901	76.65	0.487353				604515	489928	76.66	0.420443
626006	493287	76.77	0.357204				633736	488966	76.77	0.309786				590295	492690	76.75	0.486664				605305	490385	76.76	0.419602
626051	493243	76.87	0.356842				633435	488684	76.87	0.309557				590917	493056	76.85	0.485965				605376	490179	76.86	0.418393
625863	493040	76.97	0.356591				633351	488623	76.97	0.309574				591233	493098	76.95	0.484954				605303	489908	76.96	0.41742
625665	492877	77.07	0.356559	12	0.787		633426	488626	77.07	0.309322	12	0.786		591331	493001	77.05	0.484138	12	0.772		605297	489683	77.06	0.416408	12	0.786
626202	493237	77.17	0.356271				633194	488379	77.17	0.309008				591304	492863	77.15	0.483611				606159	490095	77.16	0.415098
626393	493315	77.27	0.355941				633722	488711	77.27	0.308662				591272	492749	77.26	0.483212				606076	489862	77.27	0.414336
626420	493309	77.37	0.355817				633750	488651	77.37	0.308286				591205	492686	77.36	0.483179				606029	489955	77.37	0.414938
626231	493101	77.47	0.355547				634014	488802	77.47	0.308044				591095	492623	77.46	0.48331				605527	489774	77.47	0.415971
626047	492975	77.57	0.355633				633877	488646	77.57	0.307812				591376	492918	77.56	0.483588				605403	489768	77.57	0.416405
626246	493090	77.67	0.355443				634010	488674	77.67	0.307469				591308	492891	77.66	0.483723				606149	490322	77.67	0.416177
626319	493071	77.77	0.355094				634271	488764	77.77	0.306957				590668	492306	77.76	0.483488				606139	490185	77.77	0.415586
626524	493114	77.87	0.354553				634623	488949	77.88	0.30656				590621	492122	77.86	0.482825				606002	489962	77.87	0.41507
626924	493323	77.97	0.354071				634589	488839	77.98	0.306174				591161	492470	77.96	0.48236				606341	490147	77.97	0.414661
626524	493114	79.5	0.354553	A	0.219		634623	488949	79.51	0.30656	A	0.219		590621	492122	79.49	0.482825	A	0.219		606002	489962	79.5	0.41507	A	0.219
