# Supplementary material for: A chemically induced attenuated strain of Candida albicans generates robust protective immune responses and prevents systemic candidiasis development
Source: eLife journal article supplement (doi:10.7554/elife.93760), 2024-02-07
Supplement: fig4-data1 [file Figure A ii,B ii and C ii.xlsx]

## Sheet: Fig4
	Figure A (ii)					Figure B (ii)	CFU/ml				Figure 4C (ii)
	Time in Hours	1hr	2hr	3hr		Time in Hours	1hr	2hr	3hr			Dead Mϕ/ 5 × 107 Cells Time at 2.5Hrs
	Ca	89.7	86.3	78.2		Ca	755	650	460		Ca	5000	7000	6000	5000	6000
		90.1	87	82.8			850	550	390		CAET	3000	2500	3000	1500	3000
		90.2	87.3	83.7			865	450	400
	CAET	90	82.1	60.7		CAET	630	540	120
		86.1	74	69			810	350	160
		89.8	80.3	72			760	450	200
