# Supplementary material for: A chemically induced attenuated strain of Candida albicans generates robust protective immune responses and prevents systemic candidiasis development
Source: eLife journal article supplement (doi:10.7554/elife.93760), 2024-02-07
Supplement: fig5-data1 [file Figure 5 E and F.xlsx]

## Sheet: Figure 5 E Organ CFU
	Kideny CFU/ml	3rd					7th					10th					20th					30th
	Ca	2000	1000	2000	1000	3000	286000	310000	364000	388000	216000	NA	NA	NA	NA	NA	NA	NA	NA	NA	NA	NA	NA	NA	NA	NA
	CAET	UD	UD	UD	UD	UD	14000	15000	12000	10000	10000	UD	UD	UD	UD	UD	UD	UD	UD	UD	UD	UD	UD	UD	UD	UD
	Saline	UD	UD	UD	UD	UD	UD	UD	UD	UD	UD	UD	UD	UD	UD	UD	UD	UD	UD	UD	UD	UD	UD	UD	UD	UD
	1°CAET-2°Ca	1000	1000	2000	3000	3000	13000	8000	6000	19000	10000	UD	UD	UD	UD	UD	UD	UD	UD	UD	UD	UD	UD	UD	UD	UD
	1°Saline-2°Saline	UD	UD	UD	UD	UD	UD	UD	UD	UD	UD	UD	UD	UD	UD	UD	UD	UD	UD	UD	UD	UD	UD	UD	UD	UD
	Liver CFU/ml	3rd					7th					10th					20th					30th
	Ca	UD	UD	UD	UD	UD	800	900	1000	1000	700	NA	NA	NA	NA	NA	NA	NA	NA	NA	NA	NA	NA	NA	NA	NA
	CAET	UD	UD	UD	UD	UD	UD	UD	UD	UD	UD	UD	UD	UD	UD	UD	UD	UD	UD	UD	UD	UD	UD	UD	UD	UD
	Saline	UD	UD	UD	UD	UD	UD	UD	UD	UD	UD	UD	UD	UD	UD	UD	UD	UD	UD	UD	UD	UD	UD	UD	UD	UD
	1°CAET-2°Ca	UD	UD	UD	UD	UD	UD	UD	UD	UD	UD	UD	UD	UD	UD	UD	UD	UD	UD	UD	UD	UD	UD	UD	UD	UD
	1°Saline-2°Saline	UD	UD	UD	UD	UD	UD	UD	UD	UD	UD	UD	UD	UD	UD	UD	UD	UD	UD	UD	UD	UD	UD	UD	UD	UD
	Brain CFU/ml	3rd					7th					10th					20th					30th
	Ca	100	150	200	100	200	200	230	300	400	100	NA	NA	NA	NA	NA	NA	NA	NA	NA	NA	NA	NA	NA	NA	NA
	CAET	UD	UD	UD	UD	UD	UD	UD	UD	UD	UD	UD	UD	UD	UD	UD	UD	UD	UD	UD	UD	UD	UD	UD	UD	UD
	Saline	UD	UD	UD	UD	UD	UD	UD	UD	UD	UD	UD	UD	UD	UD	UD	UD	UD	UD	UD	UD	UD	UD	UD	UD	UD
	1°CAET-2°Ca	UD	UD	UD	UD	UD	UD	UD	UD	UD	UD	UD	UD	UD	UD	UD	UD	UD	UD	UD	UD	UD	UD	UD	UD	UD
	1°Saline-2°Saline	UD	UD	UD	UD	UD	UD	UD	UD	UD	UD	UD	UD	UD	UD	UD	UD	UD	UD	UD	UD	UD	UD	UD	UD	UD
	Spleen CFU/mL	3rd					7th					10th					20th					30th
	Ca	UD	UD	UD	UD	UD	300	500	500	700	900	NA	NA	NA	NA	NA	NA	NA	NA	NA	NA	NA	NA	NA	NA	NA
	CAET	UD	UD	UD	UD	UD	UD	UD	UD	UD	UD	UD	UD	UD	UD	UD	UD	UD	UD	UD	UD	UD	UD	UD	UD	UD
	Saline	UD	UD	UD	UD	UD	UD	UD	UD	UD	UD	UD	UD	UD	UD	UD	UD	UD	UD	UD	UD	UD	UD	UD	UD	UD
	1°CAET-2°Ca	UD	UD	UD	UD	UD	100	200	100	100	200	UD	UD	UD	UD	UD	UD	UD	UD	UD	UD	UD	UD	UD	UD	UD
	1°Saline-2°Saline	UD	UD	UD	UD	UD	UD	UD	UD	UD	UD	UD	UD	UD	UD	UD	UD	UD	UD	UD	UD	UD	UD	UD	UD	UD
		NA - Not available		UD - Undetectable

## Sheet: Figure 5 F Blood cells
	WBC	3rd					7th					10th					20th					30th
	Ca	19.9	21.5	12.6	12.7	15.6	13.1	17.8	16.7	14.9	18.6	NA	NA	NA	NA	NA	NA	NA	NA	NA	NA	NA	NA	NA	NA	NA
	CAET	8.1	7.8	10	9.3	10.7	5.4	4.7	3.8	4.8	5.2	6.7	4.5	7.3	4.6	8	9.3	11.2	11.1	11.8	14.9	13.9	13.2	14.2	10.5	13.4
	Saline	9.9	3.9	3.8	6.3	10.9	13.9	12.3	14.5	11.9	12.4	12.3	15.1	13.6	12.1	11.7	11.7	13.1	15	6.9	14.2	14.1	13.2	12.9	13.5	13
	1°CAET-2°Ca	9.1	10.9	9	10.3	9.7	5.1	4.9	8.8	5.1	4.3	10.2	8.3	13.6	11.7	10.3	9.4	10.7	8.8	10.7	11.2	11.8	9.3	9.6	8.9	10.3
	Granulocytes	3rd					7th					10th					20th					30th
	Ca	13	12.6	8.2	8.3	11	12	11.8	10.2	13.5	10.9	NA	NA	NA	NA	NA	NA	NA	NA	NA	NA	NA	NA	NA	NA	NA
	CAET	1.6	1.6	1.8	2	1.4	1.1	1.2	1.3	2.01	0.7	1.2	1.6	1.3	1.8	1	1.7	2.5	2.3	2.5	2.5	2.6	2.7	2.6	1.6	3.2
	Saline	1.2	0.6	0.6	1.2	2.5	2.5	2.4	1.9	1.1	2.3	4.1	2.9	3.3	3.7	3.7	2.1	2.4	1.2	1.6	2.3	2.3	2.1	2.6	2.1	2.5
	1°CAET-2°Ca	1.6	1.4	1.6	1.8	2	1.4	1.9	1.2	1.1	1.7	3.5	3.6	4.3	4.8	5.6	2.5	3.5	2.4	2.5	2.3	1.3	1.6	2.1	2.2	1.6
	Platelets	3rd					7th					10th					20th					30th
	Ca	1450	1684	1122	1065	1099	991	984	1019	1066	788	NA	NA	NA	NA	NA	NA	NA	NA	NA	NA	NA	NA	NA	NA	NA
	CAET	1073	1118	1046	1121	1004	551	554	677	626	615	991	965	1001	1054	896	557	715	702	848	582	625	578	631	536	461
	Saline	864	424	641	1181	800	718	424	356	313	760	817	927	1007	1015	988	729	774	194	286	783	620	539	546	621	546
	1°CAET-2°Ca	403	388	346	397	408	862	688	582	746	789	1028	875	1169	1109	1001	837	794	1062	1008	1049	888	890	785	1109	1001
	Monocytes	3rd					7th					10th					20th					30th
	Ca	2.5	3.9	2.9	1.7	2.6	2.1	3.9	2.4	2.67	0.9	NA	NA	NA	NA	NA	NA	NA	NA	NA	NA	NA	NA	NA	NA	NA
	CAET	0.5	0.8	0.5	0.5	0.8	0.4	0.4	0.6	0.7	0.4	0.5	0.2	0.8	1.2	0.9	0.8	0.6	0.7	0.6	0.9	0.7	0.7	0.9	0.7	0.9
	Saline	0.5	0.3	0.7	0.4	0.7	0.2	0.3	0.2	0.19	0.3	0.3	0.3	0.7	2.3	0.6	0.8	0.7	0.8	0.5	0.8	0.8	0.8	0.8	1.2	0.8
	1°CAET-2°Ca	0.4	0.8	0.4	0.6	0.8	0.4	0.4	0.4	0.7	0.5	1.2	1	1.7	1.5	1.2	0.6	0.7	0.6	0.7	0.8	0.8	0.6	0.6	0.7	0.7
		NA - Not available
