# Supplementary material for: A chemically induced attenuated strain of Candida albicans generates robust protective immune responses and prevents systemic candidiasis development
Source: eLife journal article supplement (doi:10.7554/elife.93760), 2024-02-07
Supplement: fig5-data1 [file Figure 5.xlsx]

## Sheet: Figure 5 A
Survival Data
	Death Time (Days)	Saline	Ca	CAET	1°Saline-2°Saline	1°Saline-2°Ca	1°CAET-2°Ca
	30	0
	30	0
	30	0
	30	0
	30	0
	30	0
	7		1
	7		1
	8		1
	8		1
	8		1
	8		1
	30			0
	30			0
	30			0
	30			0
	30			0
	30			0
	60				0
	60				0
	60				0
	60				0
	60				0
	60				0
	7					1
	8					1
	9					1
	9					1
	9					1
	9					1
	60						0
	60						0
	60						0
	60						0
	60						0
	60						0

## Sheet: Figure 5 B
		CFU/Kidney (n=6)
		Ca	129500	111000	133000	148000	156000	192000
		1°Saline-2°Ca	97000	114000	184000	176000	105000	88000
		CFU/Liver (n=6)
		Ca	800	900	600	900	1900	1500
		1°Saline-2°Ca	500	200	500	1100	1000	2400
		CFU/Spleen (n=6)
		Ca	400	100	300	500	300	100
		1°Saline-2°Ca	300	200	200	200	100	200
