# Supplementary material for: A chemically induced attenuated strain of Candida albicans generates robust protective immune responses and prevents systemic candidiasis development
Source: eLife journal article supplement (doi:10.7554/elife.93760), 2024-02-07
Supplement: fig6-data1 [file Figure 6 A.xlsx]

## Sheet: IL-1α
			IL-1α (ng/ml)
				Days post infection
			Saline	3rd	0.00874	0.01061	0.01094
				7th	0.00723	0.00718	0.00788
				10th	0.0091	0.00731	0.00874
				20th	0.00517	0.00862	0.00553
				30th	0.00731	0.00495	0.00568
			Ca	3rd	0.04283	0.03653	0.02392
				7th	0.04104	0.05788	0.05137
			CAET	3rd	0.02204	0.02225	0.02348
				7th	0.00718	0.00718	0.00692
				10th	0.00822	0.00731	0.00792
				20th	0.00547	0.00718	0.00628
				30th	0.00865	0.007	0.007

## Sheet: IL-1β
			IL-1β (ng/ml)
				Days post infection
			Saline	3rd	0.00217	0.00352	0.00217
				7th	0.00485	0.00352	0.005
				10th	0.0041	0.0021	0.00333
				20th	0.0036	0.0021	0.00226
				30th	0.0001	0.002	0.00205
			Ca	3rd	0.01773	0.01826	0.01571
				7th	0.03322	0.055	0.045
			CAET	3rd	0.00826	0.00567	0.00352
				7th	0.006	0.005	0.00885
				10th	0.0051	0.0031	0.00217
				20th	0.00358	0.00217	0.0031
				30th	0.00217	0.0001	0.0001

## Sheet: IL-2
			IL-2 (ng/ml)
				Days post infection
			Saline	3rd	0.01605	0.01108	0.01045
				7th	0.01841	0.01438	0.00957
				10th	0.01045	0.00829	0.00829
				20th	0.00545	0.00745	0.00908
				30th	0.00529	0.00529	0.00562
			Ca	3rd	0.06722	0.05045	0.06908
				7th	0.08841	0.08638	0.05011
			CAET	3rd	0.06908	0.05346	0.06908
				7th	0.05129	0.06008	0.05608
				10th	0.03045	0.0319	0.03908
				20th	0.01466	0.01745	0.02011
				30th	0.00492	0.00743	0.00729

## Sheet: IL-10
			IL-10 (ng/ml)
				Days post infection
			Saline	3rd	0.06253	0.06137	0.05146
				7th	0.04411	0.04967	0.05533
				10th	0.03934	0.0541	0.04639
				20th	0.04961	0.04438	0.04037
				30th	0.03612	0.03946	0.04531
			Ca	3rd	0.13462	0.12796	0.15438
				7th	0.16631	0.199	0.20739
			CAET	3rd	0.09697	0.12001	0.0913
				7th	0.09038	0.08131	0.07946
				10th	0.0622	0.08439	0.07011
				20th	0.06217	0.04934	0.05001
				30th	0.03019	0.04238	0.04522

## Sheet: IL-12(p40)
			IL-12(p40) (ng/ml)
				Days post infection
			Saline	3rd	0.0767	0.07703	0.06373
				7th	0.06165	0.07624	0.05869
				10th	0.06215	0.05444	0.06166
				20th	0.06431	0.07711	0.05374
				30th	0.06762	0.06538	0.06298
			Ca	3rd	0.64215	0.79762	0.58906
				7th	0.47103	0.72257	0.89406
			CAET	3rd	0.24126	0.29049	0.18209
				7th	0.29667	0.27384	0.28201
				10th	0.15737	0.19614	0.17416
				20th	0.07784	0.07228	0.09049
				30th	0.08208	0.08322	0.0803

## Sheet: IL-12(p70)
			IL-12(p70) (ng/ml)
				Days post infection
			Saline	3rd	0.02	0.02004	0.02
				7th	0.02821	0.01612	0.02037
				10th	0.02021	0.02	0.02061
				20th	0.025	0.02001	0.02071
				30th	0.01988	0.01834	0.02196
			Ca	3rd	0.13375	0.10052	0.12059
				7th	0.10162	0.14011	0.13206
			CAET	3rd	0.09004	0.0899	0.08259
				7th	0.0841	0.08004	0.06691
				10th	0.06734	0.07348	0.0848
				20th	0.05578	0.06	0.05
				30th	0.02814	0.02016	0.025

## Sheet: IFNγ
			IFNγ (ng/ml)
				Days post infection
			Saline	3rd	0.01938	0.01031	0.01704
				7th	0.01755	0.01896	0.01893
				10th	0.01721	0.01338	0.01704
				20th	0.01338	0.01785	0.02128
				30th	0.01896	0.01671	0.0124
			Ca	3rd	0.07938	0.05031	0.07509
				7th	0.07671	0.05896	0.0703
			CAET	3rd	0.05878	0.0411	0.04338
				7th	0.0471	0.04461	0.0435
				10th	0.02938	0.0224	0.02257
				20th	0.02938	0.02473	0.02785
				30th	0.01179	0.01179	0.01671

## Sheet: TNFα
			TNFα (ng/ml)
				Days post infection
			Saline	3rd	0.10329	0.1045	0.09394
				7th	0.1006	0.09204	0.09798
				10th	0.09394	0.10907	0.0945
				20th	0.09544	0.09394	0.10029
				30th	0.1045	0.1	0.09706
			Ca	3rd	0.92226	0.65682	0.7745
				7th	0.92004	0.665	0.8745
			CAET	3rd	0.30204	0.4375	0.53162
				7th	0.27476	0.22004	0.34322
				10th	0.25176	0.234	0.25044
				20th	0.1745	0.16798	0.16121
				30th	0.13124	0.141	0.12394

## Sheet: GM-CSF
			GM-CSF (ng/ml)
				Days post infection
			Saline	3rd	0.01597	0.01708	0.01411
				7th	0.02003	0.01001	0.02034
				10th	0.02	0.02	0.02304
				20th	0.01795	0.02124	0.01835
				30th	0.01564	0.02239	0.02216
			Ca	3rd	0.1463	0.12119	0.14004
				7th	0.20067	0.2	0.2
			CAET	3rd	0.1112	0.1145	0.12662
				7th	0.09246	0.09001	0.08662
				10th	0.09	0.08762	0.07264
				20th	0.04205	0.03	0.04322
				30th	0.01863	0.02891	0.02344
