# Supplementary material for: A chemically induced attenuated strain of Candida albicans generates robust protective immune responses and prevents systemic candidiasis development
Source: eLife journal article supplement (doi:10.7554/elife.93760), 2024-02-07
Supplement: fig6-data1 [file Figure 6 B.xlsx]

## Sheet: IL-3
			IL-3 (ng/ml)
				Days post infection
			Saline	3rd	0.01531	0.01261	0.01422
				7th	0.0093	0.01001	0.00771
				10th	0.00817	0.0068	0.0079
				20th	0.00693	0.00801	0.01062
				30th	0.00819	0.00568	0.01007
			Ca	3rd	0.08097	0.075	0.07375
				7th	0.08201	0.0843	0.09201
			CAET	3rd	0.06001	0.07521	0.06017
				7th	0.06171	0.06132	0.04404
				10th	0.04419	0.05017	0.04163
				20th	0.03017	0.03218	0.02119
				30th	0.0262	0.02201	0.02201

## Sheet: IL-4
			IL-4 (ng/ml)
				Days post infection
			Saline	3rd	0.00539	0.00262	0.00344
				7th	0.00401	0.00282	0.00374
				10th	0.00682	0.00761	0.00491
				20th	0.0061	0.0061	0.00486
				30th	0.00514	0.00653	0.00723
			Ca	3rd	0.01562	0.01864	0.01221
				7th	0.01952	0.02347	0.02564
			CAET	3rd	0.01412	0.01506	0.01696
				7th	0.01064	0.01571	0.01273
				10th	0.01233	0.01607	0.01013
				20th	0.01092	0.00869	0.01262
				30th	0.01021	0.00916	0.00638

## Sheet: IL-5
			IL-5 (ng/ml)
				Days post infection
			Saline	3rd	0.00201	0.0076	0.0092
				7th	0.00908	0.00457	0.00237
				10th	0.00265	0.00496	0.0053
				20th	0.0051	0.002	0.0015
				30th	0.00487	0.00742	0.00286
			Ca	3rd	0.0459	0.04048	0.05908
				7th	0.05706	0.07	0.07004
			CAET	3rd	0.03057	0.02243	0.02165
				7th	0.0203	0.016	0.02166
				10th	0.01011	0.0076	0.00537
				20th	0.00655	0.00264	0.00537
				30th	0.00674	0.00267	0.0041

## Sheet: IL-6
			IL-6 (ng/ml)
				Days post infection
			Saline	3rd	0.01793	0.01763	0.018
				7th	0.01504	0.01509	0.0133
				10th	0.0177	0.01304	0.01523
				20th	0.01541	0.01934	0.01408
				30th	0.01717	0.01622	0.01158
			Ca	3rd	0.05168	0.04559	0.06865
				7th	0.0725	0.07763	0.04048
			CAET	3rd	0.06351	0.05883	0.05764
				7th	0.03385	0.02889	0.06095
				10th	0.01758	0.0203	0.02151
				20th	0.03538	0.01261	0.01738
				30th	0.01437	0.00967	0.01133

## Sheet: IL-9
			IL-9 (ng/ml)
				Days post infection
			Saline	3rd	0.02468	0.0217	0.02322
				7th	0.01981	0.01739	0.02468
				10th	0.02033	0.0107	0.01722
				20th	0.02322	0.02841	0.01616
				30th	0.02041	0.01637	0.02174
			Ca	3rd	0.11429	0.10155	0.11611
				7th	0.08372	0.13139	0.14033
			CAET	3rd	0.09112	0.1009	0.10081
				7th	0.03658	0.0403	0.03116
				10th	0.03246	0.03403	0.01403
				20th	0.02098	0.02512	0.02822
				30th	0.01438	0.0217	0.01894

## Sheet: IL-13
			IL-13 (ng/ml)
				Days post infection
			Saline	3rd	0.02616	0.02631	0.03014
				7th	0.03028	0.037	0.0291
				10th	0.02891	0.02066	0.03349
				20th	0.02014	0.02014	0.02172
				30th	0.01763	0.02148	0.01988
			Ca	3rd	0.08291	0.08664	0.08188
				7th	0.16412	0.15151	0.17232
			CAET	3rd	0.06481	0.06234	0.06088
				7th	0.051	0.0663	0.05188
				10th	0.036	0.05891	0.04748
				20th	0.02664	0.02861	0.0244
				30th	0.01447	0.01328	0.01962

## Sheet: IL-17
			IL-17 (ng/ml)
				Days post infection
			Saline	3rd	0.01787	0.0253	0.01986
				7th	0.02613	0.01745	0.01622
				10th	0.02031	0.02408	0.01311
				20th	0.01763	0.01322	0.0211
				30th	0.02033	0.02099	0.02115
			Ca	3rd	0.13934	0.13362	0.1384
				7th	0.14718	0.21787	0.1631
			CAET	3rd	0.0753	0.0806	0.09322
				7th	0.04115	0.03202	0.04772
				10th	0.02338	0.031	0.02078
				20th	0.02031	0.01207	0.01006
				30th	0.01622	0.0153	0.01798
