# Supplementary material for: A chemically induced attenuated strain of Candida albicans generates robust protective immune responses and prevents systemic candidiasis development
Source: eLife journal article supplement (doi:10.7554/elife.93760), 2024-02-07
Supplement: fig6-data1 [file Figure 6 C.xlsx]

## Sheet: RANTES
			RANTES (ng/ml)
				Days post infection
			Saline	3rd	0.03797	0.05638	0.05294
				7th	0.05464	0.05433	0.04657
				10th	0.05879	0.04138	0.04296
				20th	0.04745	0.03961	0.04745
				30th	0.04675	0.04431	0.04617
			Ca	3rd	0.15759	0.14337	0.14977
				7th	0.18879	0.19999	0.17977
			CAET	3rd	0.13677	0.143	0.111
				7th	0.137	0.12675	0.14879
				10th	0.09999	0.1052	0.09999
				20th	0.06879	0.04657	0.05523
				30th	0.03428	0.04122	0.04692

## Sheet: MCP-1
		MCP-1 (ng/ml)
			Days post infection
		Saline	3rd	0.09013	0.081	0.08011
			7th	0.08593	0.09011	0.09
			10th	0.09	0.09044	0.09
			20th	0.08	0.09245	0.08376
			30th	0.08561	0.08837	0.08169
		Ca	3rd	0.20322	0.21314	0.20467
			7th	0.27038	0.29467	0.28151
		CAET	3rd	0.20011	0.201	0.21732
			7th	0.149	0.15151	0.17038
			10th	0.1	0.0998	0.10011
			20th	0.08444	0.06592	0.076
			30th	0.08092	0.07271	0.08442

## Sheet: MIP-1α
			MIP-1α (ng/ml)
				Days post infection
			Saline	3rd	0.00717	0.00561	0.00944
				7th	0.00575	0.00868	0.00981
				10th	0.00981	0.00462	0.0051
				20th	0.00486	0.00499	0.00789
				30th	0.00392	0.00729	0.00711
			Ca	3rd	0.04011	0.02277	0.04314
				7th	0.03808	0.03981	0.04452
			CAET	3rd	0.01242	0.01891	0.01807
				7th	0.02461	0.01182	0.01808
				10th	0.02182	0.01349	0.01777
				20th	0.02019	0.01442	0.01355
				30th	0.01062	0.0181	0.00638

## Sheet: MIP-1β
			MIP-1β (ng/ml)
				Days post infection
			Saline	3rd	0.01637	0.02524	0.02648
				7th	0.02392	0.02058	0.02013
				10th	0.01888	0.01436	0.02018
				20th	0.01592	0.02438	0.02159
				30th	0.02137	0.0216	0.01844
			Ca	3rd	0.0696	0.03792	0.07759
				7th	0.05959	0.07438	0.08781
			CAET	3rd	0.06017	0.05193	0.0645
				7th	0.048	0.04131	0.02781
				10th	0.056	0.04469	0.03319
				20th	0.02781	0.02781	0.0063
				30th	0.02138	0.02591	0.01567

## Sheet: KC
			KC (ng/ml)
				Days post infection
			Saline	3rd	0.01445	0.02103	0.02381
				7th	0.01653	0.01318	0.02296
				10th	0.02117	0.01306	0.02096
				20th	0.01698	0.02014	0.01925
				30th	0.02032	0.01873	0.01642
			Ca	3rd	0.20333	0.2081	0.2239
				7th	0.25967	0.29802	0.29445
			CAET	3rd	0.17549	0.14876	0.13864
				7th	0.12325	0.15284	0.14444
				10th	0.12306	0.13232	0.14704
				20th	0.07549	0.08479	0.08876
				30th	0.03232	0.03232	0.03671

## Sheet: EOTAXIN
			EOTAXIN (ng/ml)
				Days post infection
			Saline	3rd	0.88891	0.91528	0.89351
				7th	0.811	0.83402	0.80354
				10th	0.81661	0.81833	0.7556
				20th	0.8006	0.74581	0.84331
				30th	0.87636	0.77461	0.79734
			Ca	3rd	2.35377	1.90657	1.82317
				7th	2.23559	2.04696	2.27731
			CAET	3rd	1.6186	1.27013	1.12099
				7th	0.6845	0.92314	0.74432
				10th	0.51554	0.54655	0.55898
				20th	0.68268	0.57821	0.53619
				30th	0.24605	0.10873	0.13457
