# Supplementary material for: A chemically induced attenuated strain of Candida albicans generates robust protective immune responses and prevents systemic candidiasis development
Source: eLife. 2024 May 24;13:RP93760. doi: 10.7554/eLife.93760 (PMC11126311; doi:10.7554/eLife.93760)
Supplement: Supplementary file 1. [file elife-93760-supp1.xlsx]

## Sheet: Upregulated 100 sig genes
List of upregulated genes in EDTA treated C. albicans cell (CAET)
Metal Transporters
N0. Of DEGs	Name of DEGs (13)	Max group mean	Log₂ fold change	Fold Change	FDR p-value	Function	Function as per the UniProt
1	ZRT1	974.6	12.4628	5644.99	5.20999e-82	Zinc ion transporter; Hyphal inducer	High-affinity zinc transporter
2	PRA1	3058.07	10.8371	1829.35	1.38328e-282	Zinc sequester; pH regulated antigen	Fungal innate immunity master regulator
3	CFL5	7.68298	7.23964	151.129	4.16014e-13	Ferric reductase	Siderophore transporter
4	CFL2	216.234	6.55839	94.2481	1.58887e-282	Ferric reductase; Virulence	Iron metabolism
5	PHO87	68.986	6.49676	90.3067	1.07535e-176	Phosphate transporter; Virulence	Phosphate uptake
6	ZRT2	2333.49	6.09111	68.172	2.58561e-297	Zinc uptake; Biofilm inducer	Low-affinity Zinc transporter
7	CSA2	3.74112	4.73686	26.6647	0.000886698	Hyphal inducer; Heme utilization protein; Biofilm inducer	Iron homeostasis
8	CSR1	151.788	4.53763	23.2254	2.07253e-222	zinc homeostasis, Filamentation inducer;	Candida homologue of ROK1; Zinc-responsive transcription factor
9	CSA1	801.285	4.4921	22.5038	3.44859e-166	Hyphal inducer; Iron homeostasis; Biofilm inducer;	Mycelial surface antigen; TUP1-regulated cell wall protein
10	HAP3	7.18019	4.20564	18.4511	5.412e-13	Iron homeostasis;	Signal transduction/Transcription factor
11	CFL4	2.60819	3.08173	8.46629	3.22997e-11	Uptake of iron metal ion	C-terminus of ferric reductase
12	FRE9	17.801	2.90788	7.50517	1.41623e-45	Ion transport, Ferric reductase	Alkaline induced; ciclopirox olamine; Hap43-induced
13	ARH2	77.5312	2.52578	5.75886	1.18159e-60	Involved in heme biosynthesis	Putative adrenodoxin-NADPH oxidoreductase
Cell-wall and -membrane associated
	Name (15 DEGs)	Max group mean	Log₂ fold change	Fold Change	FDR p-value	Function	Remarks
1	SCW4	1.03407	4.85772	28.9947	0.000794714	Glucanase activity	Cell wall protein
2	PGA13	171.554	4.71889	26.3347	8.37974e-163	Cell wall integrity; Morphogenesis, Virulence	Cell wall synthesis
3	PGA31	9.90951	4.46577	22.0969	1.25365e-18	Cell wall integrity	Putative GPI-anchored protein
4	CHT4	111.937	4.3724	20.7121	4.5927e-126	Chitin synthesis and degradation; Morphogenesis	Chitinase encoding gene
5	RIM9	178.449	3.6341	12.4158	4.4708e-121	Promote growth under alkaline condition	RIM-dependent pH signalling
6	ALS4	5020.94	3.32508	10.0218	1.46827e-110	Enhance cell surface adhesion	Adhesion protein
7	CSH1	1766.11	3.2538	9.53873	1.27882e-107	Maintain cell integrity; Virulence	Cell surface hydrophobicity-associated protein
8	MRV8	1.51818	3.12971	8.75261	0.00793438	Biofilm inducer; Promote mycelial development; Caspofungin tolerance	Transmembrane protein
9	HGT5	57.9725	2.9152	7.54331	2.42539e-86	Glucose transporter of the major facilitator superfamily	_
10	CDA2	3.10689	2.86124	7.26641	1.39323e-07	Chitin deacetylase	_
11	PRN4	28.5661	2.63313	6.20373	5.00644e-35	Protein with similarity to pirins	A family of pirin homologs
12	GLX3	2095.05	2.58231	5.98897	3.73497e-61	Binds human immunoglobulin E; Induce spider biofilm	Glutathione-independent glyoxalase
13	PGA7	473.062	2.49178	5.62472	2.14119e-46	GPI-linked hyphal surface antigen; Induce spider biofilm	Cell surface associated protein
14	RBT5	6939.45	2.47025	5.54139	7.36268e-45	GPI-linked cell wall protein; utilize haemin and haemoglobin; biofilm induced	Mannosylated proteins
15	JEN1	1.79914	2.37657	5.193	4.63735e-06	Localized on plasma membrane and induced by lactic acid	Lactate transporter
Others
	Name (15 DEGs)	Max group mean	Log₂ fold change	Fold Change	FDR p-value	Function	Remarks
1	LAP3	1330.51	4.37607	20.7648	6.70632e-221	Aminopeptidase; Bleomycin resistance	Aminopeptidase of cysteine protease family
2	IFD6	314.798	4.2074	18.4736	2.23594e-181	Azole resistance; Biofilm-inducer	Dehydrogenase/Oxidoreductase
3	ATO1	5.43917	3.73552	13.3199	6.23932e-08	pH neutralizer in macrophage phagolysosome	Putative ammonia/acetate transporters
4	NOP6	4.84306	3.39538	10.5223	3.90346e-07	Ribosome biosynthesis	Non-essential nucleolar protein
5	RAS2	28.1729	3.35991	10.2667	8.69395e-36	Filamentous growth enhancer; cAMP pathway regulator	Morphology switcher
6	HST6	1.03615	3.12036	8.69605	6.13855e-09	Transport lipid; antifungal drugs resistance; Encode ABC transporters	Homologue to S. cerevisiae STE6
7	STE23	111.766	3.05364	8.30304	3.41151e-92	Involved in processing of mating pheromones	Mitochondrial matrix protease
8	FGR46	9.71181	2.89689	7.44821	1.72544e-07	Filamentous Growth Regulator, Hyphal development	Unknown function without related genes
9	POL93	1962.52	2.81334	7.02912	1.77132e-69	Encode reverse transcriptase, protease and integrase; Induce biofilm	_
10	HPD1	14.9415	2.58318	5.9926	6.53346e-22	Involved in degradation of toxic propionyl-CoA; Induce spider biofilm	3-hydroxypropionate dehydrogenase
11	AOX2	284.845	2.50934	5.6936	7.22092e-114	Induce biofilm formation	Alternative oxidase
12	SOU2	1.56501	2.47887	5.57461	0.00642192	L-sorbose utilisation; biofilm induced	Protein similar to Sou1
13	GPD1	123.677	2.4543	5.48046	2.01281e-74	Involved in glycerol biosynthesis	Homologue of glycerole-3-phosphate dehydrogenase
14	CAG1	1.93879	2.40661	5.30228	2.20049e-05	Role in mating pheromone response	Heterotrimeric G protein alpha subunit
15	FDH1	194.258	2.39984	5.27745	2.01281e-74	Catalyses the oxidisation of formate to CO2; Regulated by Mig1	Formate dehydrogenase
Uncharacterized
	Name (57 DEGs)	Max group mean	Log₂ fold change	Fold Change	FDR p-value	Function	Remarks
1	CAALFM_C200860CA	667.91	10.6441	1600.23	4.4708e-121	Uncharacterized	Leucine rich repeat protein
2	CAALFM_C401340WA	29.3627	9.18886	583.61	0.000537249	Uncharacterized	Secreted protein
3	CAALFM_CR08740WA	1.59778	6.01886	64.8421	0.0357518	Uncharacterized	SWIM-type domain-containing protein
4	CAALFM_CR02340WA	2.66139	5.74311	53.5609	3.38443e-05	Uncharacterized	Vacuolar protein sorting-associated protein 8 homolog
5	CAALFM_CR07740WA	43.0912	5.39949	42.2094	1.62356e-12	Uncharacterized	Histone H2B
6	CAALFM_C602100WA	3.9792	5.00792	32.1762	0.000435707	Uncharacterized	Cell wall protein
7	CAALFM_C104010CA	115.337	4.45864	21.988	4.82253e-124	Uncharacterized	Aldo_ket_red domain-containing protein
8	CAALFM_C604230WA	13.2664	4.25926	19.1498	1.67518e-34	Uncharacterized	BHLH domain-containing protein
9	CAALFM_C110050WA	2.28351	4.18047	18.132	0.000124176	Uncharacterized	SH3 domain-containing protein
10	CAALFM_CR06510WA	48.4838	4.12141	17.4047	6.21185e-37	Uncharacterized	Septicolysin
11	CAALFM_CR06500CA	184.318	3.76612	13.6055	2.25687e-88	Uncharacterized	Septicolysin
12	CAALFM_CR08310CA	11.7733	3.41404	10.6593	4.21036e-20	Uncharacterized	TauD domain-containing protein
13	CAALFM_CR06570CA	70.7537	3.40985	10.6284	6.6067e-77	Uncharacterized	Leucine-rich repeat protein
14	CAALFM_C204430WA	3.31393	3.31112	9.92535	0.00387524	Uncharacterized	F-box domain-containing protein
15	CAALFM_C303570CA	2.54468	3.26471	9.61113	5.27224e-07	Uncharacterized	TauD domain-containing protein
16	CAALFM_C306040WA	26.5918	3.2428	9.46628	1.09545e-56	Uncharacterized	Zinc finger protein LEE1
17	CAALFM_C106860WA	1.2463	3.23378	9.40732	0.000100814	Uncharacterized	RTA1-domain-containing protein
18	CAALFM_C602480WA	225.628	3.23078	9.38773	1.58803e-89	Uncharacterized	NADP-dependent alcohol dehydrogenase
19	CAALFM_C302790WA	9.62715	3.19016	9.12715	2.43382e-06	Uncharacterized	_
20	CAALFM_C503430WA	4.01366	3.11208	8.69039	0.000101716	Uncharacterized	Glyco_trans_2-like domain-containing protein
21	CAALFM_C402930WA	6.03198	3.10926	8.6463	2.18312e-11	Uncharacterized	Pyr_redox_2 domain-containing protein
22	CAALFM_C403340CA	1.71602	3.08391	8.62941	0.000183681	Uncharacterized	Oxidant-induced cell-cycle arrest protein 5
23	CAALFM_C701010WA	31.015	3.07318	8.47907	3.30179e-61	Uncharacterized	MFS domain-containing protein
24	CAALFM_C202580WA	3.72152	3.06209	8.41626	0.00149263	Uncharacterized	Ovule protein
25	CAALFM_C405830WA	2.55734	3.11942	8.35182	3.67121e-05	Uncharacterized	Protein BIG1
26	CAALFM_C304210WA	6.66736	3.01907	8.10645	3.03712e-07	Uncharacterized	_
27	CAALFM_C406150CA	1.38205	2.99465	7.97038	0.0142915	Uncharacterized	Homologous-pairing protein 2 winged helix domain-containing protein
28	CAALFM_C303370CA	527.941	2.99465	7.97037	1.19287e-135	Uncharacterized	_
29	CAALFM_C204450WA	8.16777	2.97199	7.84617	6.43154e-11	Uncharacterized	_
30	CAALFM_C202180WA (ZRT3)	52.7331	2.94994	7.72715	3.31888e-71	Uncharacterized	Zn(2+) transporter
31	CAALFM_C100270WA	1721.68	2.83588	7.13976	4.2578e-73	Uncharacterized	Ty3 transposon capsid-like protein domain-containing protein
32	CAALFM_C401860CA	3.81335	2.82259	7.0743	1.14226e-09	Uncharacterized	_
32	CAALFM_C302360CA	25.7472	2.76487	6.79687	5.99145e-37	Uncharacterized	Sulfatase N-terminal domain-containing protein
34	CAALFM_C600980CA	49.8461	2.74191	6.68957	7.44423e-52	Uncharacterized	Putative lipase ATG15
35	CAALFM_CR06310WA	1.2127	2.73412	6.65352	0.00233344	Uncharacterized	N-acetyltransferase domain-containing protein
36	CAALFM_C202750CA	1.43942	2.71793	6.57929	0.000307212	Uncharacterized	_
37	CAALFM_C200760CA	616.841	2.6953	6.4769	1.48506e-85	Uncharacterized	_
38	CAALFM_C104690CA	1.54917	2.65307	6.29004	1.03644e-05	Uncharacterized	Rad21/Rec8-like protein N-terminal domain-containing protein
39	CAALFM_C304350CA	17.9735	2.63898	6.22893	1.2123e-25	Uncharacterized	NADPH-dependent 1-acyldihydroxyacetone phosphate reductase
40	CAALFM_C207620WA	1.90853	2.62436	6.16611	6.18529e-06	Uncharacterized	DH domain-containing protein
41	CAALFM_CR01910CA	2.72763	2.58897	6.01669	0.000328533	Uncharacterized	_
42	CAALFM_C702280WA	1.38132	2.58833	6.01403	0.0376537	Uncharacterized	_
43	CAALFM_C307070CA	54.3657	2.56622	5.92257	2.70125e-54	Uncharacterized	_
44	CAALFM_C405900CA	245.351	2.56481	5.91678	1.12485e-116	Uncharacterized	_
45	CAALFM_CR07260CA	1.46509	2.5553	5.87788	0.0139679	Uncharacterized	Meiotic nuclear division protein 1
46	CAALFM_C106620CA	1.26855	2.55521	5.87752	0.0161182	Uncharacterized	_
47	CAALFM_C109300CA	8.70003	2.54399	5.83201	2.75478e-11	Uncharacterized	Class II aldolase/adducin N-terminal domain-containing protein
48	CAALFM_CR09530CA	207.211	2.53318	5.78846	2.74225e-78	Uncharacterized	DDE-1 domain-containing protein
49	CAALFM_C209850CA	2.79283	2.52957	5.774	3.08818e-07	Uncharacterized	Fe2OG dioxygenase domain-containing protein
50	CAALFM_C601940WA	4.71751	2.48353	5.59265	0.00601119	Uncharacterized	_
51	CAALFM_C100310WA	389.45	2.47844	5.57294	6.50774e-57	Uncharacterized	Protein PNS1
52	CAALFM_C601810WA	5.21522	2.47604	5.56368	1.97617e-12	Uncharacterized	F-box domain-containing protein
52	CAALFM_C110060CA	9.87619	2.43653	5.41337	4.01975e-08	Uncharacterized	_
54	CAALFM_CR07300WA	1.12799	2.38604	5.2272	7.10193e-05	Uncharacterized	FAD-binding FR-type domain-containing protein
55	CAALFM_C402330CA	5.35274	2.38231	5.2137	6.40082e-05	Uncharacterized	_
56	CAALFM_C603240WA	4.67068	2.38143	5.21052	9.75776e-08	Uncharacterized	Methylglyoxal reductase (NADPH-dependent)
57	CAALFM_C305840WA (FMO1)	1.37524	2.3723	5.17767	0.000145963	Uncharacterized	Thiol-specific monooxygenase
