# Supplementary material for: A chemically induced attenuated strain of Candida albicans generates robust protective immune responses and prevents systemic candidiasis development
Source: eLife. 2024 May 24;13:RP93760. doi: 10.7554/eLife.93760 (PMC11126311; doi:10.7554/eLife.93760)
Supplement: Supplementary file 2. — (A) GO annotation analysis for 411 upregulated genes and (B) 388 downregulated genes. [file elife-93760-supp2.xlsx]

## Sheet: Table-S2
(A) GO Enrichment analysis associated upregulated genes (411) in EDTA treated C. albicans cells
#term ID	term description (Biological Processess)	No. of DEGs	false discovery rate	matching proteins in network (labels)
GO:0055114	Oxidation-reduction process	70	0.00015	CaO19.4476,IFD6,PRN3,ZWF1,AOX2,AOX1,ADH3,ARH2,GRE2,CaO19.2202,RNR22,IFM3,IFR1,CaO19.1639,CaO19.5879,CaO19.7364,GLG2,FRP1,CaO19.5655,SOD1,CaO19.1438,CFL2,CaO19.1961,CFL5,CFL4,FET34,GPX1,HPD1,SOD3,FRP2,AHP2,CaO19.1340,CaO19.2394,CaO19.541,CaO19.6138,CaO19.3711,CaO19.6398,CaO19.7306,SOU2,FRE10,CSH1,FDH1,CaO19.6869,MRF1,GPD2,GPX2,GPD1,PST2,CaO19.1366,CaO19.2244,FRE9,CaO19.3537,AMO1,DRE2,RIB3,MAE1,PRN…
GO:0044419	Interspecies interaction between organisms	34	0.0206	CFL2,GIT4,ALS4,CSA1,PHR1,SAP5,HWP1,PRA1,BRG1,UME6,PGA7,SEF1,MNN14,AFT2,CSA2,PGA13,SSU1,PGA31,IFF11,IHD1,HGC1,MDR1,SAP6,SOD5,PGA19,DFI1,CaO19.6484,CHK1,PGA17,SFL2,CRH12,CaO19.3932,TYE7,TEC1
GO:0009405	Pathogenesis	33	0.0113	CFL2,GIT4,ALS4,CSA1,PHR1,SAP5,HWP1,PRA1,BRG1,UME6,PGA7,SEF1,MNN14,AFT2,CSA2,PGA13,SSU1,PGA31,IFF11,IHD1,HGC1,MDR1,SAP6,SOD5,PGA19,DFI1,CaO19.6484,CHK1,PGA17,SFL2,CRH12,TYE7,TEC1
GO:0006812	Cation transport	31	0.0358	HGT1,FTH1,FTR1,FTR2,HGT8,CaO19.1534,ZRT2,SMF12,JEN1,FRP1,JEN2,CFL2,ZRT1,CFL5,CFL4,FET34,CAN3,ALS4,FRP2,CaO19.6138,RTA4,FRE10,RBT5,GAP4,FRE9,CSA2,SIT1,ENA21,CaO19.6224,HGT6,CCC2
GO:0048878	Chemical homeostasis	30	0.0014	FTH1,FTR1,FTR2,CaO19.1534,ARH2,SMF12,FRP1,SOD1,SUL2,CFL2,CFL5,CFL4,FET34,ALS4,FRP2,CaO19.6138,CSA1,PRA1,FRE10,RBT5,SEF1,AFT2,FRE9,CSA2,SIT1,ZSF1,HMX1,CaO19.6805,CCC2,CaO19.4577
GO:0019725	Cellular homeostasis	30	0.0056	FTR1,FTR2,CaO19.1534,ARH2,SMF12,FRP1,SOD1,SUL2,CFL2,CFL5,CFL4,FET34,ALS4,FRP2,AHP2,CaO19.6138,CSA1,PRA1,FRE10,RBT5,SEF1,AFT2,FRE9,CSA2,SIT1,ZSF1,HMX1,CaO19.6805,CCC2,CaO19.4577
GO:0098771	Inorganic ion homeostasis	29	0.0001	FTH1,FTR1,FTR2,CaO19.1534,ARH2,SMF12,FRP1,SOD1,SUL2,CFL2,CFL5,CFL4,FET34,ALS4,FRP2,CaO19.6138,CSA1,PRA1,FRE10,RBT5,SEF1,AFT2,FRE9,CSA2,SIT1,ZSF1,HMX1,CaO19.6805,CCC2
GO:0055082	Cellular chemical homeostasis	29	0.0005	FTR1,FTR2,CaO19.1534,ARH2,SMF12,FRP1,SOD1,SUL2,CFL2,CFL5,CFL4,FET34,ALS4,FRP2,CaO19.6138,CSA1,PRA1,FRE10,RBT5,SEF1,AFT2,FRE9,CSA2,SIT1,ZSF1,HMX1,CaO19.6805,CCC2,CaO19.4577
GO:0006873	Cellular ion homeostasis	28	0.00025	FTR1,FTR2,CaO19.1534,ARH2,SMF12,FRP1,SOD1,SUL2,CFL2,CFL5,CFL4,FET34,ALS4,FRP2,CaO19.6138,CSA1,PRA1,FRE10,RBT5,SEF1,AFT2,FRE9,CSA2,SIT1,ZSF1,HMX1,CaO19.6805,CCC2
GO:0055080	Cation homeostasis	28	0.00026	FTH1,FTR1,FTR2,CaO19.1534,ARH2,SMF12,FRP1,SOD1,SUL2,CFL2,CFL5,CFL4,FET34,ALS4,FRP2,CaO19.6138,CSA1,PRA1,FRE10,RBT5,SEF1,AFT2,FRE9,CSA2,SIT1,ZSF1,HMX1,CCC2
GO:0055076	Transition metal ion homeostasis	27	1.97e-06	FTH1,FTR1,FTR2,CaO19.1534,ARH2,SMF12,FRP1,SOD1,CFL2,CFL5,CFL4,FET34,ALS4,FRP2,CaO19.6138,CSA1,PRA1,FRE10,RBT5,SEF1,AFT2,FRE9,CSA2,SIT1,ZSF1,HMX1,CCC2
GO:0030003	Cellular cation homeostasis	27	0.00026	FTR1,FTR2,CaO19.1534,ARH2,SMF12,FRP1,SOD1,SUL2,CFL2,CFL5,CFL4,FET34,ALS4,FRP2,CaO19.6138,CSA1,PRA1,FRE10,RBT5,SEF1,AFT2,FRE9,CSA2,SIT1,ZSF1,HMX1,CCC2
GO:0046916	Cellular transition metal ion homeostasis	26	1.97e-06	FTR1,FTR2,CaO19.1534,ARH2,SMF12,FRP1,SOD1,CFL2,CFL5,CFL4,FET34,ALS4,FRP2,CaO19.6138,CSA1,PRA1,FRE10,RBT5,SEF1,AFT2,FRE9,CSA2,SIT1,ZSF1,HMX1,CCC2
GO:0055072	Iron ion homeostasis	24	1.97e-06	FTH1,FTR1,FTR2,ARH2,FRP1,SOD1,CFL2,CFL5,CFL4,FET34,ALS4,FRP2,CaO19.6138,CSA1,FRE10,RBT5,SEF1,AFT2,FRE9,CSA2,SIT1,ZSF1,HMX1,CCC2
GO:0006879	Cellular iron ion homeostasis	23	1.97e-06	FTR1,FTR2,ARH2,FRP1,SOD1,CFL2,CFL5,CFL4,FET34,ALS4,FRP2,CaO19.6138,CSA1,FRE10,RBT5,SEF1,AFT2,FRE9,CSA2,SIT1,ZSF1,HMX1,CCC2
GO:0030001	Metal ion transport	23	0.00036	FTH1,FTR1,FTR2,CaO19.1534,ZRT2,SMF12,FRP1,CFL2,ZRT1,CFL5,CFL4,FET34,ALS4,FRP2,CaO19.6138,FRE10,RBT5,GAP4,FRE9,CSA2,SIT1,ENA21,CCC2
GO:0000041	Transition metal ion transport	22	1.97e-06	FTH1,FTR1,FTR2,CaO19.1534,ZRT2,SMF12,FRP1,CFL2,ZRT1,CFL5,CFL4,FET34,ALS4,FRP2,CaO19.6138,FRE10,RBT5,GAP4,FRE9,CSA2,SIT1,CCC2
GO:0051703	Intraspecies interaction between organisms	18	0.0031	ALS4,CSA1,GAM1,PHR1,SAP5,HWP1,BRG1,RBT5,PGA7,CSA2,RMD9,ALS1,HGC1,SAP6,CHK1,SFL2,TYE7,TEC1
GO:0006826	Iron ion transport	17	1.12e-05	FTH1,FTR1,FTR2,SMF12,FRP1,CFL2,CFL5,CFL4,FET34,ALS4,FRP2,CaO19.6138,FRE10,RBT5,FRE9,CSA2,SIT1
GO:0044010	Single-species biofilm formation	16	0.0113	ALS4,CSA1,GAM1,PHR1,SAP5,HWP1,BRG1,RBT5,PGA7,CSA2,RMD9,HGC1,SAP6,CHK1,TYE7,TEC1
GO:0090609	Single-species submerged biofilm formation	14	0.045	ALS4,CSA1,GAM1,PHR1,HWP1,BRG1,RBT5,PGA7,CSA2,RMD9,HGC1,CHK1,TYE7,TEC1
GO:0044011	Single-species biofilm formation on inanimate substrate	13	0.0269	ALS4,CSA1,GAM1,PHR1,BRG1,RBT5,PGA7,CSA2,RMD9,HGC1,CHK1,TYE7,TEC1
GO:0006825	Copper ion transport	9	0.0206	SMF12,FRP1,CFL2,CFL5,CFL4,FRP2,CaO19.6138,FRE10,FRE9
GO:0033212	Iron import into cell	8	0.0068	FTR1,FTR2,FRP1,FET34,ALS4,FRP2,RBT5,SIT1
GO:0015677	Copper ion import	8	0.0197	FRP1,CFL2,CFL5,CFL4,FRP2,CaO19.6138,FRE10,FRE9
GO:0034755	Iron ion transmembrane transport	7	0.015	FTH1,FTR1,FTR2,FRP1,FRP2,CSA2,SIT1
GO:0033215	Reductive iron assimilation	6	0.0478	FTR1,FTR2,FRP1,FET34,ALS4,FRP2
GO:1901678	Iron coordination entity transport	5	0.0399	FRP1,FRP2,RBT5,CSA2,SIT1
#term ID	term description (Molecular Function)	No. of DEGs	false discovery rate	matching proteins in network (labels)
GO:0016491	Oxidoreductase activity	67	7.03e-06	CaO19.4476,IFD6,PRN3,ZWF1,AOX2,AOX1,ADH3,ARH2,GRE2,CaO19.2202,RNR22,IFM3,IFR1,CaO19.1639,CaO19.5879,CaO19.7364,FRP1,CaO19.5655,SOD1,CaO19.1438,CFL2,CaO19.1961,CFL5,CFL4,FET34,GPX1,HPD1,SOD3,FRP2,AHP2,CaO19.1340,CaO19.2394,CaO19.541,CaO19.6138,CaO19.3711,CaO19.6398,CaO19.7306,SOU2,FRE10,CSH1,FDH1,CaO19.6869,MRF1,GPD2,GPX2,GPD1,PST2,CaO19.1366,CaO19.2244,FRE9,CaO19.3537,AMO1,DRE2,MAE1,PRN2,PRN4,HMX…
GO:0016616	Oxidoreductase activity, acting on the ch-oh group of donors, nad or nadp as acceptor	19	0.0093	CaO19.4476,IFD6,ZWF1,ADH3,GRE2,IFM3,CaO19.5879,HPD1,CaO19.1340,CaO19.7306,CSH1,FDH1,GPD2,GPD1,CaO19.2244,MAE1,CaO19.5611,CaO19.5517,CaO19.6816
GO:0016722	Oxidoreductase activity, oxidizing metal ions	9	0.03	FRP1,CFL2,CFL5,CFL4,FET34,FRP2,CaO19.6138,FRE10,FRE9
GO:0052851	Ferric-chelate reductase (nadph) activity	8	0.0255	FRP1,CFL2,CFL5,CFL4,FRP2,CaO19.6138,FRE10,FRE9
GO:0000293	Ferric-chelate reductase activity	8	0.0284	FRP1,CFL2,CFL5,CFL4,FRP2,CaO19.6138,FRE10,FRE9
#term ID	term description (Cellular Component)	No. of DEGs	false discovery rate	matching proteins in network (labels)
GO:0071944	Cell periphery	86	0.00098	HGT1,A0A1D8PCT3,PHO87,CaO19.4789,CaO19.4805,CaO19.4906,FTR1,FTR2,HGT8,ZRT2,SMF12,ATO1,CaO19.1632,CaO19.341,JEN1,FRP1,CaO19.4668,PDC12,SUL2,JEN2,CFL2,ZRT1,GIT4,CFL5,CFL4,FET34,CAN3,ALS4,FRP2,CDA2,SEO1,STE2,HGT16,CaO19.6138,HGT14,RTA4,CSA1,GAM1,PHR1,SAP5,HWP1,PRA1,FRE10,PIR32,FUS1,RBT5,PGA7,PRM1,GAP4,RIM9,DDR48,RAS1,PST2,FRE9,XUT1,SIT1,PGA13,SSU1,CaO19.3395,ENA21,PGA31,AGP3,IFF11,IHD1,ALS1,CaO19.62…
GO:0005886	Plasma membrane	65	0.00098	HGT1,A0A1D8PCT3,PHO87,CaO19.4789,CaO19.4906,FTR1,FTR2,HGT8,ZRT2,SMF12,ATO1,CaO19.1632,CaO19.341,JEN1,FRP1,CaO19.4668,PDC12,SUL2,JEN2,CFL2,ZRT1,GIT4,CFL5,CFL4,FET34,CAN3,ALS4,FRP2,STE2,HGT16,CaO19.6138,HGT14,RTA4,CSA1,PHR1,FRE10,FUS1,RBT5,PGA7,PRM1,GAP4,RIM9,RAS1,PST2,FRE9,XUT1,SIT1,SSU1,CaO19.3395,ENA21,AGP3,CaO19.6224,PNS1,MDR1,PGA11,CaO19.2038,PGA19,HGT6,CaO19.6805,DFI1,PGA17,CAG1,CaO19.4577,HG…
GO:0005576	Extracellular region	30	0.0035	LIP1,PDC12,SOD1,ALS4,CSA1,GAM1,PHR1,SAP5,HWP1,PRA1,PIR32,RBT5,PGA7,DDR48,CSA2,PGA13,RIB3,PGA31,IFF11,IHD1,ALS1,SAP6,SOD5,CaO19.2059,GLX3,DFI1,CaO19.6484,SCW4,CRH12,CHT4
GO:0005618	Cell wall	25	0.0077	PDC12,ALS4,CDA2,CSA1,GAM1,PHR1,SAP5,HWP1,PRA1,PIR32,RBT5,PGA7,DDR48,PGA13,PGA31,IFF11,IHD1,ALS1,SAP6,SOD5,GLX3,DFI1,CaO19.6484,SCW4,CRH12
(B) GO Enrichment analysis associated downregulated genes (388) in EDTA treated C. albicans cells
#term ID	term description (Biological Processess)	No. of DEGs	false discovery rate	matching proteins in network (labels)
GO:0009987	Cellular process	332	1.26e-09	ERG2,A0A1D8PCD7,RPS21B,RPS42,ABC1,MRP20,CaO19.3661,A0A1D8PCQ5,SNO1,FRS2,LYS2,RPS16A,CaO19.3048,A0A1D8PDL6,RPS14B,A0A1D8PDT4,RPS23A,HAK1,GLT1,CaO19.6219,A0A1D8PDZ1,GCV2,ARG5,6,RPL42,RPS17B,RPL2,RPL82,PHO84,RPL29,CDC54,A0A1D8PFI8,RPL4B,CaO19.7256,RPL38,ARO8,CaO19.2067,CHA1,ARO3,FEN12,RPS9B,THI20,RPL39,CaO19.810,CaO19.3560,A0A1D8PHH4,IDP1,VAS1,RPL11,CaO19.2214,GDH2,RPS10,TIM22,CaO19.2167,ASN1,ERG24,…
GO:0008152	Metabolic process	283	2.82e-13	ERG2,A0A1D8PCD7,RPS21B,RPS42,ABC1,MRP20,GAL7,CaO19.3661,GAL10,A0A1D8PCQ5,SNO1,FRS2,LYS2,RPS16A,FMA1,IFE1,A0A1D8PDL6,RPS14B,A0A1D8PDT4,RPS23A,GLT1,A0A1D8PDZ1,GCV2,CaO19.4735,ARG5,6,RPL42,RPS17B,RPL2,RPL82,PHO84,RPL29,CDC54,RPL4B,CaO19.7256,RPL38,ARO8,CaO19.2067,CHA1,ARO3,FEN12,RPS9B,THI20,RPL39,CaO19.810,CaO19.3560,A0A1D8PHH4,IDP1,VAS1,RPL11,CaO19.2214,GDH2,RPS10,CaO19.2167,ASN1,ERG24,LEU42,ALI1,C…
GO:0044237	Cellular metabolic process	270	2.22e-16	ERG2,A0A1D8PCD7,RPS21B,RPS42,ABC1,MRP20,CaO19.3661,A0A1D8PCQ5,SNO1,FRS2,LYS2,RPS16A,A0A1D8PDL6,RPS14B,A0A1D8PDT4,RPS23A,GLT1,A0A1D8PDZ1,GCV2,ARG5,6,RPL42,RPS17B,RPL2,RPL82,PHO84,RPL29,CDC54,RPL4B,CaO19.7256,RPL38,ARO8,CaO19.2067,CHA1,ARO3,FEN12,RPS9B,THI20,RPL39,CaO19.810,CaO19.3560,A0A1D8PHH4,IDP1,VAS1,RPL11,CaO19.2214,GDH2,RPS10,CaO19.2167,ASN1,ERG24,LEU42,CaO19.1662,CaO19.1626,RPS15,RPL19A,RPL…
GO:0071704	Organic substance metabolic process	261	4.23e-13	ERG2,A0A1D8PCD7,RPS21B,RPS42,ABC1,MRP20,GAL7,CaO19.3661,GAL10,A0A1D8PCQ5,SNO1,FRS2,LYS2,RPS16A,A0A1D8PDL6,RPS14B,A0A1D8PDT4,RPS23A,GLT1,A0A1D8PDZ1,GCV2,ARG5,6,RPL42,RPS17B,RPL2,RPL82,PHO84,RPL29,CDC54,RPL4B,CaO19.7256,RPL38,ARO8,CaO19.2067,CHA1,ARO3,FEN12,RPS9B,THI20,RPL39,CaO19.810,CaO19.3560,A0A1D8PHH4,IDP1,VAS1,RPL11,CaO19.2214,GDH2,RPS10,CaO19.2167,ASN1,ERG24,LEU42,CaO19.1662,CaO19.1626,RPS15…
GO:0044238	Primary metabolic process	252	1.25e-13	ERG2,A0A1D8PCD7,RPS21B,RPS42,ABC1,MRP20,GAL7,CaO19.3661,GAL10,A0A1D8PCQ5,SNO1,FRS2,LYS2,RPS16A,A0A1D8PDL6,RPS14B,A0A1D8PDT4,RPS23A,GLT1,A0A1D8PDZ1,GCV2,ARG5,6,RPL42,RPS17B,RPL2,RPL82,RPL29,CDC54,RPL4B,CaO19.7256,RPL38,ARO8,CaO19.2067,CHA1,ARO3,FEN12,RPS9B,RPL39,CaO19.810,CaO19.3560,A0A1D8PHH4,IDP1,VAS1,RPL11,CaO19.2214,GDH2,RPS10,CaO19.2167,ASN1,ERG24,LEU42,CaO19.1662,CaO19.1626,RPS15,RPL19A,RPL1…
GO:0006807	Nitrogen compound metabolic process	239	2.11e-14	A0A1D8PCD7,RPS21B,RPS42,ABC1,MRP20,CaO19.3661,A0A1D8PCQ5,SNO1,FRS2,LYS2,RPS16A,A0A1D8PDL6,RPS14B,A0A1D8PDT4,RPS23A,GLT1,A0A1D8PDZ1,GCV2,ARG5,6,RPL42,RPS17B,RPL2,RPL82,RPL29,CDC54,RPL4B,CaO19.7256,RPL38,ARO8,CaO19.2067,CHA1,ARO3,FEN12,RPS9B,THI20,RPL39,CaO19.810,CaO19.3560,A0A1D8PHH4,IDP1,VAS1,RPL11,CaO19.2214,GDH2,RPS10,CaO19.2167,ASN1,LEU42,CaO19.1662,CaO19.1626,RPS15,RPL19A,RPL18,RPS19A,CAM1,A0…
GO:1901564	Organonitrogen compound metabolic process	211	1.46e-26	A0A1D8PCD7,RPS21B,RPS42,ABC1,MRP20,CaO19.3661,A0A1D8PCQ5,SNO1,FRS2,LYS2,RPS16A,RPS14B,A0A1D8PDT4,RPS23A,GLT1,A0A1D8PDZ1,GCV2,ARG5,6,RPL42,RPS17B,RPL2,RPL82,RPL29,RPL4B,RPL38,ARO8,CaO19.2067,CHA1,ARO3,FEN12,RPS9B,THI20,RPL39,CaO19.3560,A0A1D8PHH4,IDP1,VAS1,RPL11,CaO19.2214,GDH2,RPS10,ASN1,LEU42,CaO19.1662,CaO19.1626,RPS15,RPL19A,RPL18,RPS19A,CAM1,A0A1D8PKF3,LYS9,OPI3,HIS4,CaO19.4161,RPL40B,AAT22,C…
GO:0009058	Biosynthetic process	208	4.67e-36	ERG2,A0A1D8PCD7,RPS21B,RPS42,ABC1,MRP20,A0A1D8PCQ5,SNO1,FRS2,LYS2,RPS16A,RPS14B,A0A1D8PDT4,RPS23A,GLT1,A0A1D8PDZ1,ARG5,6,RPL42,RPS17B,RPL2,RPL82,RPL29,CDC54,RPL4B,RPL38,ARO8,ARO3,FEN12,RPS9B,THI20,RPL39,CaO19.810,CaO19.3560,A0A1D8PHH4,IDP1,VAS1,RPL11,CaO19.2214,RPS10,ASN1,ERG24,LEU42,CaO19.1662,CaO19.1626,RPS15,RPL19A,RPL18,RPS19A,FAS2,CAM1,A0A1D8PKF3,LYS9,OPI3,HIS4,RPL40B,AAT22,ILV6,IDI1,EFB1,A0…
GO:1901576	Organic substance biosynthetic process	207	3.26e-36	ERG2,A0A1D8PCD7,RPS21B,RPS42,ABC1,MRP20,A0A1D8PCQ5,SNO1,FRS2,LYS2,RPS16A,RPS14B,A0A1D8PDT4,RPS23A,GLT1,A0A1D8PDZ1,ARG5,6,RPL42,RPS17B,RPL2,RPL82,RPL29,CDC54,RPL4B,RPL38,ARO8,ARO3,FEN12,RPS9B,THI20,RPL39,CaO19.810,CaO19.3560,A0A1D8PHH4,IDP1,VAS1,RPL11,CaO19.2214,RPS10,ASN1,ERG24,LEU42,CaO19.1662,RPS15,RPL19A,RPL18,RPS19A,FAS2,CAM1,A0A1D8PKF3,LYS9,OPI3,HIS4,RPL40B,AAT22,ILV6,IDI1,EFB1,A0A1D8PM41,TR…
GO:0044249	Cellular biosynthetic process	204	4.65e-36	ERG2,A0A1D8PCD7,RPS21B,RPS42,ABC1,MRP20,A0A1D8PCQ5,SNO1,FRS2,LYS2,RPS16A,RPS14B,A0A1D8PDT4,RPS23A,GLT1,A0A1D8PDZ1,ARG5,6,RPL42,RPS17B,RPL2,RPL82,RPL29,CDC54,RPL4B,RPL38,ARO8,ARO3,FEN12,RPS9B,THI20,RPL39,CaO19.810,CaO19.3560,A0A1D8PHH4,IDP1,VAS1,RPL11,CaO19.2214,RPS10,ASN1,ERG24,LEU42,CaO19.1662,RPS15,RPL19A,RPL18,RPS19A,FAS2,CAM1,A0A1D8PKF3,LYS9,OPI3,HIS4,RPL40B,AAT22,ILV6,IDI1,EFB1,A0A1D8PM41,TR…
GO:0034641	Cellular nitrogen compound metabolic process	187	1.04e-16	A0A1D8PCD7,RPS21B,RPS42,MRP20,A0A1D8PCQ5,SNO1,FRS2,RPS16A,A0A1D8PDL6,RPS14B,A0A1D8PDT4,RPS23A,A0A1D8PDZ1,RPL42,RPS17B,RPL2,RPL82,RPL29,CDC54,RPL4B,CaO19.7256,RPL38,RPS9B,THI20,RPL39,CaO19.810,CaO19.3560,A0A1D8PHH4,VAS1,RPL11,CaO19.2214,RPS10,CaO19.2167,ASN1,CaO19.1662,RPS15,RPL19A,RPL18,RPS19A,CAM1,A0A1D8PKF3,HIS4,CaO19.4161,RPL40B,AAT22,RBT7,EFB1,A0A1D8PM41,RPL30,TRP5,CaO19.5698,CaO19.5684,THS1,…
GO:1901566	Organonitrogen compound biosynthetic process	187	2.3e-59	A0A1D8PCD7,RPS21B,RPS42,MRP20,A0A1D8PCQ5,SNO1,FRS2,LYS2,RPS16A,RPS14B,A0A1D8PDT4,RPS23A,GLT1,A0A1D8PDZ1,ARG5,6,RPL42,RPS17B,RPL2,RPL82,RPL29,RPL4B,RPL38,ARO8,ARO3,FEN12,RPS9B,THI20,RPL39,CaO19.3560,A0A1D8PHH4,IDP1,VAS1,RPL11,CaO19.2214,RPS10,ASN1,LEU42,CaO19.1662,RPS15,RPL19A,RPL18,RPS19A,CAM1,A0A1D8PKF3,LYS9,OPI3,HIS4,RPL40B,AAT22,ILV6,EFB1,A0A1D8PM41,TRP5,GDH3,CaO19.5698,CaO19.5684,THS1,A0A1D8P…
GO:0043170	Macromolecule metabolic process	176	0.00053	A0A1D8PCD7,RPS21B,RPS42,ABC1,MRP20,CaO19.3661,A0A1D8PCQ5,FRS2,RPS16A,A0A1D8PDL6,RPS14B,A0A1D8PDT4,RPS23A,A0A1D8PDZ1,RPL42,RPS17B,RPL2,RPL82,RPL29,CDC54,RPL4B,CaO19.7256,RPL38,CaO19.2067,RPS9B,RPL39,CaO19.810,CaO19.3560,A0A1D8PHH4,VAS1,RPL11,CaO19.2214,RPS10,CaO19.2167,CaO19.1662,CaO19.1626,RPS15,RPL19A,RPL18,RPS19A,CAM1,A0A1D8PKF3,CaO19.4161,RPL40B,CaO19.4657,RBT7,EFB1,A0A1D8PM41,RPL30,CaO19.5698…
GO:0044260	Cellular macromolecule metabolic process	165	8.74e-09	A0A1D8PCD7,RPS21B,RPS42,ABC1,MRP20,CaO19.3661,A0A1D8PCQ5,FRS2,RPS16A,RPS14B,A0A1D8PDT4,RPS23A,A0A1D8PDZ1,RPL42,RPS17B,RPL2,RPL82,RPL29,CDC54,RPL4B,CaO19.7256,RPL38,RPS9B,RPL39,CaO19.810,CaO19.3560,A0A1D8PHH4,VAS1,RPL11,CaO19.2214,RPS10,CaO19.1662,CaO19.1626,RPS15,RPL19A,RPL18,RPS19A,CAM1,A0A1D8PKF3,CaO19.4161,RPL40B,CaO19.4657,RBT7,EFB1,A0A1D8PM41,CaO19.5698,CaO19.5684,THS1,A0A1D8PMX3,A0A1D8PN83,…
GO:0044271	Cellular nitrogen compound biosynthetic process	155	6.93e-32	A0A1D8PCD7,RPS21B,RPS42,MRP20,A0A1D8PCQ5,SNO1,FRS2,RPS16A,RPS14B,A0A1D8PDT4,RPS23A,A0A1D8PDZ1,RPL42,RPS17B,RPL2,RPL82,RPL29,RPL4B,RPL38,RPS9B,THI20,RPL39,CaO19.3560,A0A1D8PHH4,VAS1,RPL11,CaO19.2214,RPS10,ASN1,CaO19.1662,RPS15,RPL19A,RPL18,RPS19A,CAM1,A0A1D8PKF3,RPL40B,AAT22,EFB1,A0A1D8PM41,TRP5,CaO19.5698,CaO19.5684,THS1,A0A1D8PMX3,A0A1D8PN83,CAM1-1,A0A1D8PNP0,RPS25B,MSM1,RPL43A,RPS13,COX15,RPL32…
GO:0010467	Gene expression	152	6.6e-19	A0A1D8PCD7,RPS21B,RPS42,MRP20,A0A1D8PCQ5,FRS2,RPS16A,A0A1D8PDL6,RPS14B,A0A1D8PDT4,RPS23A,A0A1D8PDZ1,RPL42,RPS17B,RPL2,RPL82,RPL29,RPL4B,CaO19.7256,RPL38,CaO19.2067,RPS9B,RPL39,CaO19.3560,A0A1D8PHH4,VAS1,RPL11,CaO19.2214,RPS10,CaO19.2167,CaO19.1662,CaO19.1626,RPS15,RPL19A,RPL18,RPS19A,CAM1,A0A1D8PKF3,RPL40B,EFB1,A0A1D8PM41,RPL30,CaO19.5698,CaO19.5684,THS1,A0A1D8PMX3,A0A1D8PN83,CAM1-1,A0A1D8PNP0,RP…
GO:0019538	Protein metabolic process	148	2.76e-15	A0A1D8PCD7,RPS21B,RPS42,ABC1,MRP20,CaO19.3661,A0A1D8PCQ5,FRS2,RPS16A,RPS14B,A0A1D8PDT4,RPS23A,A0A1D8PDZ1,RPL42,RPS17B,RPL2,RPL82,RPL29,RPL4B,RPL38,CaO19.2067,RPS9B,RPL39,CaO19.3560,A0A1D8PHH4,VAS1,RPL11,CaO19.2214,RPS10,CaO19.1662,CaO19.1626,RPS15,RPL19A,RPL18,RPS19A,CAM1,A0A1D8PKF3,CaO19.4161,RPL40B,CaO19.4657,EFB1,A0A1D8PM41,CaO19.5698,CaO19.5684,THS1,A0A1D8PMX3,A0A1D8PN83,CAM1-1,A0A1D8PNP0,RPS…
GO:0044267	Cellular protein metabolic process	147	4.45e-18	A0A1D8PCD7,RPS21B,RPS42,ABC1,MRP20,CaO19.3661,A0A1D8PCQ5,FRS2,RPS16A,RPS14B,A0A1D8PDT4,RPS23A,A0A1D8PDZ1,RPL42,RPS17B,RPL2,RPL82,RPL29,RPL4B,RPL38,RPS9B,RPL39,CaO19.3560,A0A1D8PHH4,VAS1,RPL11,CaO19.2214,RPS10,CaO19.1662,CaO19.1626,RPS15,RPL19A,RPL18,RPS19A,CAM1,A0A1D8PKF3,CaO19.4161,RPL40B,CaO19.4657,EFB1,A0A1D8PM41,CaO19.5698,CaO19.5684,THS1,A0A1D8PMX3,A0A1D8PN83,CAM1-1,A0A1D8PNP0,RPS25B,MSM1,RP…
GO:0043603	Cellular amide metabolic process	140	4.89e-54	A0A1D8PCD7,RPS21B,RPS42,MRP20,A0A1D8PCQ5,FRS2,RPS16A,RPS14B,A0A1D8PDT4,RPS23A,A0A1D8PDZ1,RPL42,RPS17B,RPL2,RPL82,RPL29,RPL4B,RPL38,RPS9B,RPL39,CaO19.3560,A0A1D8PHH4,VAS1,RPL11,CaO19.2214,RPS10,ASN1,CaO19.1662,RPS15,RPL19A,RPL18,RPS19A,CAM1,A0A1D8PKF3,RPL40B,AAT22,EFB1,A0A1D8PM41,CaO19.5698,CaO19.5684,THS1,A0A1D8PMX3,A0A1D8PN83,CAM1-1,A0A1D8PNP0,RPS25B,MSM1,RPL43A,RPS13,RPL32,TIF3,CaO19.688,RPL23A…
GO:0034645	Cellular macromolecule biosynthetic process	140	1.72e-23	A0A1D8PCD7,RPS21B,RPS42,MRP20,A0A1D8PCQ5,FRS2,RPS16A,RPS14B,A0A1D8PDT4,RPS23A,A0A1D8PDZ1,RPL42,RPS17B,RPL2,RPL82,RPL29,CDC54,RPL4B,RPL38,RPS9B,RPL39,CaO19.810,CaO19.3560,A0A1D8PHH4,VAS1,RPL11,CaO19.2214,RPS10,CaO19.1662,RPS15,RPL19A,RPL18,RPS19A,CAM1,A0A1D8PKF3,RPL40B,EFB1,A0A1D8PM41,CaO19.5698,CaO19.5684,THS1,A0A1D8PMX3,A0A1D8PN83,CAM1-1,A0A1D8PNP0,RPS25B,MSM1,RPL43A,RPS13,RPL32,TIF3,CaO19.688,R…
GO:0043604	Amide biosynthetic process	139	1.88e-60	A0A1D8PCD7,RPS21B,RPS42,MRP20,A0A1D8PCQ5,FRS2,RPS16A,RPS14B,A0A1D8PDT4,RPS23A,A0A1D8PDZ1,RPL42,RPS17B,RPL2,RPL82,RPL29,RPL4B,RPL38,RPS9B,RPL39,CaO19.3560,A0A1D8PHH4,VAS1,RPL11,CaO19.2214,RPS10,ASN1,CaO19.1662,RPS15,RPL19A,RPL18,RPS19A,CAM1,A0A1D8PKF3,RPL40B,AAT22,EFB1,A0A1D8PM41,CaO19.5698,CaO19.5684,THS1,A0A1D8PMX3,A0A1D8PN83,CAM1-1,A0A1D8PNP0,RPS25B,MSM1,RPL43A,RPS13,RPL32,TIF3,CaO19.688,RPL23A…
GO:0006518	Peptide metabolic process	130	2e-55	A0A1D8PCD7,RPS21B,RPS42,MRP20,A0A1D8PCQ5,FRS2,RPS16A,RPS14B,A0A1D8PDT4,RPS23A,A0A1D8PDZ1,RPL42,RPS17B,RPL2,RPL82,RPL29,RPL4B,RPL38,RPS9B,RPL39,CaO19.3560,A0A1D8PHH4,VAS1,RPL11,CaO19.2214,RPS10,CaO19.1662,RPS15,RPL19A,RPL18,RPS19A,CAM1,A0A1D8PKF3,RPL40B,EFB1,A0A1D8PM41,CaO19.5698,CaO19.5684,THS1,A0A1D8PMX3,A0A1D8PN83,CAM1-1,A0A1D8PNP0,RPS25B,MSM1,RPL43A,RPS13,RPL32,TIF3,CaO19.688,RPL23A,GUS1,RPS28…
GO:0006412	Translation	129	4.94e-60	A0A1D8PCD7,RPS21B,RPS42,MRP20,A0A1D8PCQ5,FRS2,RPS16A,RPS14B,A0A1D8PDT4,RPS23A,A0A1D8PDZ1,RPL42,RPS17B,RPL2,RPL82,RPL29,RPL4B,RPL38,RPS9B,RPL39,CaO19.3560,A0A1D8PHH4,VAS1,RPL11,CaO19.2214,RPS10,CaO19.1662,RPS15,RPL19A,RPL18,RPS19A,CAM1,A0A1D8PKF3,RPL40B,EFB1,A0A1D8PM41,CaO19.5698,CaO19.5684,THS1,A0A1D8PMX3,A0A1D8PN83,CAM1-1,A0A1D8PNP0,RPS25B,MSM1,RPL43A,RPS13,RPL32,TIF3,CaO19.688,RPL23A,GUS1,RPS28…
GO:0044281	Small molecule metabolic process	90	1.02e-09	ERG2,ABC1,GAL7,GAL10,SNO1,FRS2,LYS2,GLT1,GCV2,ARG5,6,PHO84,ARO8,CHA1,ARO3,FEN12,THI20,IDP1,VAS1,GDH2,ASN1,ERG24,LEU42,FAS2,LYS9,HIS4,AAT22,ILV6,DAO2,TRP5,GDH3,THS1,PUT1,MSM1,ILV5,GCV1,GUS1,LEU1,ARG1,ACC1,CDC60,BIO2,ARC1,CaO19.2415,CaO19.2382,ACO2,ADE13,ARO2,ERG13,CaO19.7330,FDH3,ERG6,INO1,TIM54,ARO4,MET6,ACH1,SAH1,SER1,FEN1,IMH3,DED81,ARG4,MIS11,LYS22,GAL102,GAL1,FAD2,SER2,THI13,DFR1,LYS4,CaO19.5…
GO:0043436	Oxoacid metabolic process	67	3.56e-10	SNO1,FRS2,LYS2,GLT1,GCV2,ARG5,6,PHO84,ARO8,CHA1,ARO3,FEN12,IDP1,VAS1,GDH2,ASN1,LEU42,FAS2,LYS9,HIS4,AAT22,ILV6,DAO2,TRP5,GDH3,THS1,PUT1,MSM1,ILV5,GCV1,GUS1,LEU1,ARG1,ACC1,CDC60,BIO2,ARC1,CaO19.2415,CaO19.2382,ACO2,ARO2,FDH3,ARO4,MET6,ACH1,SER1,FEN1,DED81,ARG4,MIS11,LYS22,FAD2,SER2,DFR1,LYS4,CaO19.5455,CRC1,LYS12,LEU4,MSW1,ECM42,UGA11,HTS1,ILV3,PUT2,GCV3,MLS1,ACS2
GO:0019752	Carboxylic acid metabolic process	65	6.4e-10	SNO1,FRS2,LYS2,GLT1,GCV2,ARG5,6,ARO8,CHA1,ARO3,FEN12,IDP1,VAS1,GDH2,ASN1,LEU42,FAS2,LYS9,HIS4,AAT22,ILV6,DAO2,TRP5,GDH3,THS1,PUT1,MSM1,ILV5,GCV1,GUS1,LEU1,ARG1,ACC1,CDC60,BIO2,ARC1,CaO19.2415,CaO19.2382,ACO2,ARO2,FDH3,ARO4,MET6,ACH1,SER1,FEN1,DED81,ARG4,MIS11,LYS22,FAD2,SER2,DFR1,LYS4,CRC1,LYS12,LEU4,MSW1,ECM42,UGA11,HTS1,ILV3,PUT2,GCV3,MLS1,ACS2
GO:0006520	Cellular amino acid metabolic process	55	3.66e-13	SNO1,FRS2,LYS2,GLT1,GCV2,ARG5,6,ARO8,CHA1,ARO3,IDP1,VAS1,GDH2,ASN1,LEU42,LYS9,HIS4,AAT22,ILV6,DAO2,TRP5,GDH3,THS1,PUT1,MSM1,ILV5,GCV1,GUS1,LEU1,ARG1,CDC60,ARC1,CaO19.2415,CaO19.2382,ACO2,ARO2,FDH3,ARO4,MET6,SER1,DED81,ARG4,MIS11,LYS22,SER2,DFR1,LYS4,LYS12,LEU4,MSW1,ECM42,UGA11,HTS1,ILV3,PUT2,GCV3
GO:0044283	Small molecule biosynthetic process	55	4.83e-10	ERG2,ABC1,SNO1,LYS2,GLT1,ARG5,6,ARO8,ARO3,FEN12,THI20,IDP1,ASN1,ERG24,LEU42,FAS2,LYS9,HIS4,AAT22,ILV6,TRP5,GDH3,PUT1,ILV5,LEU1,ARG1,ACC1,BIO2,ACO2,ARO2,ERG13,FDH3,ERG6,INO1,TIM54,ARO4,MET6,SER1,FEN1,IMH3,ARG4,MIS11,LYS22,FAD2,SER2,THI13,DFR1,LYS4,LYS12,LEU4,THI6,ECM42,SNZ1,ILV3,PUT2,THI4
GO:0022613	Ribonucleoprotein complex biogenesis	54	3.43e-05	RPS21B,A0A1D8PCQ5,A0A1D8PDL6,A0A1D8PDZ1,RPS17B,RPL82,CaO19.7256,RPL38,RPS9B,A0A1D8PHH4,RPL11,CaO19.2214,RPS10,CaO19.2167,RPS15,RPS19A,RPL30,A0A1D8PN83,RPS13,TIF3,CaO19.688,RPS28B,RPS18,RPP0,SUI3,CaO19.2594,RPS3,RPS27,A0A1D8PTL2,RPS0,RPL3,RPS8A,CaO19.2314,NOP7,RPF2,TIF35,NOP1,UBI3,RPS20,SSZ1,CaO19.3797,RPS24,RPS21,ZUO1,RPS5,GCD11,RPL5,RLI1,RPS7A,RPL12,RPS26A,NIP1,RPL8B,RPL10A
GO:0002181	Cytoplasmic translation	48	1.36e-23	A0A1D8PCQ5,A0A1D8PDZ1,RPS17B,RPL2,RPL82,RPL29,RPL4B,RPL38,RPL39,A0A1D8PHH4,RPS10,RPS15,RPL19A,RPL18,RPS19A,A0A1D8PM41,A0A1D8PN83,RPS25B,RPS13,TIF3,RPL23A,RPS18,RPP0,RPP1B,SUI3,RPL28,RPS3,RPS27,RPP2A,RPS0,MTG2,RPS8A,TIF35,RPS20,SSZ1,RPL15A,RPS24,RPS12,RPL9B,RPS5,GCD11,RPL5,RPS7A,RPL12,RPS26A,NIP1,RPL8B,RPP2B
GO:0042254	Ribosome biogenesis	48	3.43e-05	RPS21B,A0A1D8PCQ5,A0A1D8PDL6,A0A1D8PDZ1,RPS17B,RPL82,CaO19.7256,RPS9B,A0A1D8PHH4,RPL11,CaO19.2214,RPS10,CaO19.2167,RPS15,RPS19A,RPL30,A0A1D8PN83,RPS13,CaO19.688,RPS28B,RPS18,RPP0,CaO19.2594,RPS3,RPS27,A0A1D8PTL2,RPS0,RPL3,RPS8A,CaO19.2314,NOP7,RPF2,NOP1,UBI3,RPS20,SSZ1,CaO19.3797,RPS24,RPS21,ZUO1,RPS5,RPL5,RLI1,RPS7A,RPL12,RPS26A,RPL8B,RPL10A
GO:0034660	ncRNA metabolic process	43	0.016	RPS21B,FRS2,A0A1D8PDL6,RPL82,CaO19.7256,RPS9B,VAS1,CaO19.2167,RPL30,THS1,A0A1D8PN83,MSM1,RPS13,CaO19.688,GUS1,RPS18,CDC60,ARC1,CaO19.2415,CaO19.2382,RPS27,RPL3,DED81,RPS8A,TRM5,CaO19.2314,NOP7,RPF2,NOP1,UBI3,RPS20,SSZ1,MTO1,RPS24,RPS21,PPM2,ZUO1,MSW1,RLI1,RPS7A,HTS1,RPL8B,RPL10A
GO:0046394	Carboxylic acid biosynthetic process	40	1.04e-08	LYS2,GLT1,ARG5,6,ARO8,ARO3,FEN12,IDP1,ASN1,LEU42,FAS2,LYS9,HIS4,AAT22,ILV6,TRP5,GDH3,PUT1,ILV5,LEU1,ARG1,ACC1,BIO2,ACO2,ARO2,ARO4,MET6,SER1,FEN1,ARG4,MIS11,LYS22,FAD2,SER2,DFR1,LYS4,LYS12,LEU4,ECM42,ILV3,PUT2
GO:0140053	Mitochondrial gene expression	38	1.43e-12	A0A1D8PCD7,MRP20,CaO19.3560,CaO19.2214,CaO19.1662,A0A1D8PKF3,CaO19.5698,CaO19.5684,A0A1D8PMX3,A0A1D8PNP0,CaO19.688,CaO19.7012,MRPL6,CaO19.2415,CaO19.2382,A0A1D8PSW9,A0A1D8PTL2,CaO19.7675,CaO19.397,CaO19.2639,MRPL8,TRM5,CaO19.585,CaO19.2275,MRPL51,CaO19.3797,CaO19.549,CaO19.498,MRPL40,MTO1,CaO19.5420,MEF2,MSW1,CaO19.863,CaO19.828,HTS1,MEF1,CaO19.1485
GO:1901605	Alpha-amino acid metabolic process	38	3.35e-08	SNO1,LYS2,GLT1,GCV2,ARG5,6,ARO8,CHA1,IDP1,GDH2,ASN1,LEU42,LYS9,HIS4,AAT22,ILV6,DAO2,TRP5,GDH3,PUT1,ILV5,GCV1,LEU1,ARG1,ACO2,MET6,SER1,ARG4,MIS11,LYS22,SER2,DFR1,LYS4,LYS12,LEU4,ECM42,ILV3,PUT2,GCV3
GO:0032543	Mitochondrial translation	36	1.13e-12	A0A1D8PCD7,MRP20,CaO19.3560,CaO19.2214,CaO19.1662,A0A1D8PKF3,CaO19.5698,CaO19.5684,A0A1D8PMX3,A0A1D8PNP0,CaO19.688,CaO19.7012,MRPL6,CaO19.2415,CaO19.2382,A0A1D8PSW9,A0A1D8PTL2,CaO19.7675,CaO19.397,CaO19.2639,MRPL8,CaO19.585,CaO19.2275,MRPL51,CaO19.3797,CaO19.549,CaO19.498,MRPL40,CaO19.5420,MEF2,MSW1,CaO19.863,CaO19.828,HTS1,MEF1,CaO19.1485
GO:0008652	Cellular amino acid biosynthetic process	34	2.04e-09	LYS2,GLT1,ARG5,6,ARO8,ARO3,IDP1,ASN1,LEU42,LYS9,HIS4,AAT22,ILV6,TRP5,GDH3,PUT1,ILV5,LEU1,ARG1,ACO2,ARO2,ARO4,MET6,SER1,ARG4,MIS11,LYS22,SER2,DFR1,LYS4,LYS12,LEU4,ECM42,ILV3,PUT2
GO:1901607	Alpha-amino acid biosynthetic process	31	1.71e-08	LYS2,GLT1,ARG5,6,ARO8,IDP1,ASN1,LEU42,LYS9,HIS4,AAT22,ILV6,TRP5,GDH3,PUT1,ILV5,LEU1,ARG1,ACO2,MET6,SER1,ARG4,MIS11,LYS22,SER2,DFR1,LYS4,LYS12,LEU4,ECM42,ILV3,PUT2
GO:0022618	Ribonucleoprotein complex assembly	24	0.00042	RPS17B,RPL38,RPL11,CaO19.2214,RPS10,RPS15,RPS19A,A0A1D8PN83,TIF3,CaO19.688,RPP0,SUI3,RPS27,A0A1D8PTL2,RPS0,RPL3,RPF2,TIF35,UBI3,RPS5,GCD11,RPL5,RPL12,NIP1
GO:0006417	Regulation of translation	22	0.0055	RPS9B,CAM1,CaO19.7386,EFB1,CAM1-1,TIF3,SUI3,CEF3,ASC1,TEF2,GIS2,TIF35,EFT2,CaO19.2201,CaO19.498,RPS21,TUF1,GCD11,PAB1,RLI1,MEF1,NIP1
GO:0070925	Organelle assembly	20	0.0064	RPS17B,RPL11,CaO19.2214,RPS10,RPS15,RPS19A,A0A1D8PN83,CaO19.688,RPP0,CaO19.714,RPS27,A0A1D8PTL2,RPS0,RPL3,RPF2,UBI3,RPS5,RPL5,RPL12,RPS26A
GO:0042255	Ribosome assembly	19	1.65e-06	RPS17B,RPL11,CaO19.2214,RPS10,RPS15,RPS19A,A0A1D8PN83,CaO19.688,RPP0,RPS27,A0A1D8PTL2,RPS0,RPL3,RPF2,UBI3,RPS5,RPL5,RPL12,RPS26A
GO:0042274	Ribosomal small subunit biogenesis	19	0.005	RPS17B,RPS9B,RPS10,CaO19.2167,RPS15,RPS19A,A0A1D8PN83,RPS13,CaO19.688,RPS18,RPS27,A0A1D8PTL2,RPS0,RPS8A,UBI3,RPS20,RPS24,RPS5,RPS7A
GO:0006839	Mitochondrial transport	17	0.0207	TIM22,CTP1,CaO19.7386,TIM10,YHM1,CaO19.6555,HSP60,OCT1,PAM18,TIM50,TIM23,TIM44,CRC1,MGE1,TIM13,CaO19.6565,TOM40
GO:0042273	Ribosomal large subunit biogenesis	16	0.0105	A0A1D8PCQ5,A0A1D8PDL6,RPL82,A0A1D8PHH4,RPL11,CaO19.2214,CaO19.2167,RPP0,RPL3,NOP7,RPF2,RPL5,RLI1,RPL12,RPL8B,RPL10A
GO:0072655	Establishment of protein localization to mitochondrion	14	0.0061	TIM22,CaO19.7386,TIM10,CaO19.6555,HSP60,OCT1,PAM18,TIM50,TIM23,TIM44,MGE1,TIM13,CaO19.6565,TOM40
GO:0006414	Translational elongation	14	2.97e-06	CAM1,EFB1,CAM1-1,RPP1B,RPP2A,CEF3,ASC1,TEF2,EFT2,SSZ1,TUF1,ZUO1,MEF1,RPP2B
GO:0006626	Protein targeting to mitochondrion	13	0.0077	TIM22,TIM10,CaO19.6555,HSP60,OCT1,PAM18,TIM50,TIM23,TIM44,MGE1,TIM13,CaO19.6565,TOM40
GO:0006418	tRNA aminoacylation for protein translation	12	0.0019	FRS2,VAS1,THS1,MSM1,GUS1,CDC60,ARC1,CaO19.2415,CaO19.2382,DED81,MSW1,HTS1
GO:0009064	Glutamine family amino acid metabolic process	12	0.0097	SNO1,GLT1,ARG5,6,IDP1,GDH2,ASN1,GDH3,PUT1,ARG1,ARG4,ECM42,PUT2
GO:0043648	Dicarboxylic acid metabolic process	12	0.0023	GLT1,ARO3,IDP1,GDH2,AAT22,GDH3,PUT1,ARO2,ARO4,MIS11,DFR1,PUT2
GO:0000028	Ribosomal small subunit assembly	11	4.98e-05	RPS17B,RPS10,RPS15,RPS19A,A0A1D8PN83,CaO19.688,RPS27,A0A1D8PTL2,RPS0,UBI3,RPS5
GO:0006450	Regulation of translational fidelity	11	0.00015	FRS2,RPS9B,VAS1,CDC60,CaO19.2382,SSZ1,CaO19.498,RPS21,ZUO1,RPS5,GCD11
GO:0009067	Aspartate family amino acid biosynthetic process	11	0.0436	LYS2,ARO8,ASN1,LYS9,AAT22,ACO2,MET6,MIS11,LYS22,LYS4,LYS12
GO:0043650	Dicarboxylic acid biosynthetic process	10	0.00055	GLT1,ARO3,IDP1,AAT22,GDH3,PUT1,ARO2,ARO4,MIS11,PUT2
GO:0071428	rRNA-containing ribonucleoprotein complex export from nucleus	10	0.039	RPS10,RPS15,RPS19A,RPS18,RPS3,RPS21,ZUO1,RPS5,RLI1,RPS26A
GO:0009084	Glutamine family amino acid biosynthetic process	9	0.0028	GLT1,ARG5,6,IDP1,GDH3,PUT1,ARG1,ARG4,ECM42,PUT2
GO:0006407	rRNA export from nucleus	8	0.00051	RPS10,RPS15,RPS19A,RPS18,RPS3,RPS21,RPS5,RPS26A
GO:0045727	Positive regulation of translation	8	0.0175	RPS9B,CaO19.7386,GIS2,CaO19.2201,CaO19.498,RPS21,GCD11,RLI1
GO:0019878	Lysine biosynthetic process via aminoadipic acid	7	0.0021	LYS2,ARO8,LYS9,ACO2,LYS22,LYS4,LYS12
GO:0006536	Glutamate metabolic process	6	0.011	GLT1,IDP1,GDH2,GDH3,PUT1,PUT2
GO:0006537	Glutamate biosynthetic process	5	0.0084	GLT1,IDP1,GDH3,PUT1,PUT2
GO:0006772	Thiamine metabolic process	5	0.0084	THI20,CaO19.7330,THI13,THI6,THI4
GO:0009228	Thiamine biosynthetic process	4	0.0343	THI20,THI13,THI6,THI4
#term ID	term description (Molecular Function)	No. of DEGs	false discovery rate	matching proteins in network (labels)
GO:1901363	Heterocyclic compound binding	143	0.0037	RPS42,ABC1,MRP20,A0A1D8PCQ5,FRS2,CaO19.6853,YBN5,GLT1,A0A1D8PDZ1,ARG5,6,RPL2,RPL82,CDC54,RPL4B,CaO19.7256,RPL38,ARO8,CHA1,RPS9B,RPL39,CaO19.810,IDP1,VAS1,RPL11,CaO19.2214,RPS10,CaO19.2167,ASN1,RPS15,RPL19A,RPL18,CAM1,HIS4,AAT22,UME7,RBT7,DAO2,EFB1,A0A1D8PM41,RPL30,CaO19.5684,THS1,A0A1D8PN83,PUT1,CAM1-1,CaO19.1287,MSM1,PEX4,RPS13,ILV5,TIF3,CaO19.688,RPL23A,CaO19.7091,GUS1,CYB5,RPS18,RPP0,SSP96,CaO…
GO:0097159	Organic cyclic compound binding	143	0.0041	RPS42,ABC1,MRP20,A0A1D8PCQ5,FRS2,CaO19.6853,YBN5,GLT1,A0A1D8PDZ1,ARG5,6,RPL2,RPL82,CDC54,RPL4B,CaO19.7256,RPL38,ARO8,CHA1,RPS9B,RPL39,CaO19.810,IDP1,VAS1,RPL11,CaO19.2214,RPS10,CaO19.2167,ASN1,RPS15,RPL19A,RPL18,CAM1,HIS4,AAT22,UME7,RBT7,DAO2,EFB1,A0A1D8PM41,RPL30,CaO19.5684,THS1,A0A1D8PN83,PUT1,CAM1-1,CaO19.1287,MSM1,PEX4,RPS13,ILV5,TIF3,CaO19.688,RPL23A,CaO19.7091,GUS1,CYB5,RPS18,RPP0,SSP96,CaO…
GO:0003735	Structural constituent of ribosome	98	1.21e-53	A0A1D8PCD7,RPS21B,RPS42,MRP20,A0A1D8PCQ5,RPS16A,A0A1D8PDL6,RPS14B,A0A1D8PDT4,RPS23A,A0A1D8PDZ1,RPL42,RPS17B,RPL2,RPL82,RPL29,RPL4B,RPL38,RPS9B,RPL39,CaO19.3560,A0A1D8PHH4,RPL11,CaO19.2214,RPS10,CaO19.1662,RPS15,RPL19A,RPL18,RPS19A,A0A1D8PKF3,RPL40B,A0A1D8PM41,RPL30,CaO19.5698,CaO19.5684,A0A1D8PMX3,A0A1D8PN83,A0A1D8PNP0,RPS25B,RPL43A,RPS13,RPL32,CaO19.688,RPL23A,RPS28B,RPS18,CaO19.7012,RPP0,RPP1B,…
GO:0003676	Nucleic acid binding	93	0.0041	RPS42,MRP20,A0A1D8PCQ5,FRS2,CaO19.6853,A0A1D8PDZ1,RPL2,RPL82,CDC54,RPL4B,CaO19.7256,RPL38,RPS9B,RPL39,CaO19.810,RPL11,CaO19.2214,RPS10,CaO19.2167,RPS15,RPL19A,RPL18,CAM1,UME7,RBT7,EFB1,A0A1D8PM41,RPL30,CaO19.5684,A0A1D8PN83,CAM1-1,CaO19.1287,RPS13,ILV5,TIF3,CaO19.688,RPL23A,GUS1,RPS18,RPP0,CaO19.5128,SUI3,MRPL6,MCM6,RPL28,ARC1,CaO19.2415,CaO19.2382,CaO19.496,RPS3,A0A1D8PTL2,CaO19.3492,CaO19.7328,…
GO:0003723	RNA binding	76	1.96e-09	RPS42,MRP20,A0A1D8PCQ5,FRS2,A0A1D8PDZ1,RPL2,RPL82,RPL4B,CaO19.7256,RPL38,RPS9B,RPL39,RPL11,CaO19.2214,RPS10,CaO19.2167,RPS15,RPL19A,RPL18,CAM1,RBT7,EFB1,A0A1D8PM41,RPL30,CaO19.5684,A0A1D8PN83,CAM1-1,RPS13,TIF3,CaO19.688,RPL23A,GUS1,RPS18,RPP0,CaO19.5128,SUI3,MRPL6,RPL28,ARC1,CaO19.2415,CaO19.2382,RPS3,A0A1D8PTL2,CaO19.7328,RPL13,MRPS9,CEF3,TEF2,GIS2,RPF2,TIF35,EFT2,NOP1,RPS20,DFR1,RPS4A,CaO19.498…
GO:0019843	rRNA binding	20	3.92e-07	RPS42,RPL2,RPS9B,RPL11,CaO19.5684,A0A1D8PN83,RPS13,CaO19.688,RPL23A,RPS18,RPP0,MRPL6,RPF2,RPS4A,CaO19.498,RPS21,RPL9B,RPS5,RPL5,RPL12
GO:0045182	Translation regulator activity	15	0.0037	CAM1,EFB1,CAM1-1,TIF3,SUI3,CEF3,TEF2,GIS2,TIF35,EFT2,TUF1,GCD11,RLI1,MEF1,NIP1
GO:0008135	Translation factor activity, rna binding	14	0.0037	CAM1,EFB1,CAM1-1,TIF3,SUI3,CEF3,TEF2,TIF35,EFT2,TUF1,GCD11,RLI1,MEF1,NIP1
GO:0004812	aminoacyl-tRNA ligase activity	11	0.0082	FRS2,VAS1,THS1,MSM1,GUS1,CDC60,CaO19.2415,CaO19.2382,DED81,MSW1,HTS1
GO:0003746	Translation elongation factor activity	8	0.0027	CAM1,EFB1,CAM1-1,CEF3,TEF2,EFT2,TUF1,MEF1
GO:0016638	Oxidoreductase activity, acting on the ch-nh2 group of donors	6	0.0295	GLT1,GCV2,CaO19.4735,GDH2,DAO2,GDH3
GO:0046912	Transferase activity, transferring acyl groups, acyl groups converted into alkyl on transfer	5	0.037	LEU42,ERG13,LYS22,LEU4,MLS1
#term ID	term description (Cellular Component))	No. of DEGs	false discovery rate	matching proteins in network (labels)
GO:0110165	Cellular anatomical entity	350	1.06e-08	237561.A0A1D8PCB9,237561.A0A1D8PCD7,237561.A0A1D8PCG7,237561.A0A1D8PCI6,237561.A0A1D8PCI9,237561.A0A1D8PCJ1,237561.A0A1D8PCM2,237561.A0A1D8PCM4,237561.A0A1D8PCN0,237561.A0A1D8PCQ5,237561.A0A1D8PCS7,237561.A0A1D8PCT4,237561.A0A1D8PCV7,237561.A0A1D8PCW6,237561.A0A1D8PD17,237561.A0A1D8PDA4,237561.A0A1D8PDC5,237561.A0A1D8PDC7,237561.A0A1D8PDE8,237561.A0A1D8PDL6,237561.A0A1D8PDT3,237561.A0A1D8PDT4,237…
GO:0005622	Intracellular	319	1.84e-05	237561.A0A1D8PCB9,237561.A0A1D8PCD7,237561.A0A1D8PCG7,237561.A0A1D8PCI6,237561.A0A1D8PCI9,237561.A0A1D8PCJ1,237561.A0A1D8PCM2,237561.A0A1D8PCM4,237561.A0A1D8PCN0,237561.A0A1D8PCQ5,237561.A0A1D8PCS7,237561.A0A1D8PCT4,237561.A0A1D8PCV7,237561.A0A1D8PCW6,237561.A0A1D8PD17,237561.A0A1D8PDA4,237561.A0A1D8PDC5,237561.A0A1D8PDC7,237561.A0A1D8PDE8,237561.A0A1D8PDL6,237561.A0A1D8PDT3,237561.A0A1D8PDT4,237…
GO:0005737	Cytoplasm	292	9.36e-13	237561.A0A1D8PCB9,237561.A0A1D8PCD7,237561.A0A1D8PCG7,237561.A0A1D8PCI6,237561.A0A1D8PCI9,237561.A0A1D8PCJ1,237561.A0A1D8PCM2,237561.A0A1D8PCM4,237561.A0A1D8PCN0,237561.A0A1D8PCQ5,237561.A0A1D8PCS7,237561.A0A1D8PCT4,237561.A0A1D8PCV7,237561.A0A1D8PDA4,237561.A0A1D8PDC5,237561.A0A1D8PDE8,237561.A0A1D8PDL6,237561.A0A1D8PDU9,237561.A0A1D8PDY5,237561.A0A1D8PDZ1,237561.A0A1D8PE97,237561.A0A1D8PEE6,237…
GO:0043226	Organelle	278	0.0014	237561.A0A1D8PCB9,237561.A0A1D8PCD7,237561.A0A1D8PCG7,237561.A0A1D8PCI6,237561.A0A1D8PCI9,237561.A0A1D8PCJ1,237561.A0A1D8PCM4,237561.A0A1D8PCQ5,237561.A0A1D8PCW6,237561.A0A1D8PD17,237561.A0A1D8PDC7,237561.A0A1D8PDL6,237561.A0A1D8PDT3,237561.A0A1D8PDT4,237561.A0A1D8PDU3,237561.A0A1D8PDU9,237561.A0A1D8PDY5,237561.A0A1D8PDZ1,237561.A0A1D8PE97,237561.A0A1D8PEI6,237561.A0A1D8PEV4,237561.A0A1D8PEY9,237…
GO:0043229	Intracellular organelle	272	0.0027	237561.A0A1D8PCB9,237561.A0A1D8PCD7,237561.A0A1D8PCG7,237561.A0A1D8PCI6,237561.A0A1D8PCI9,237561.A0A1D8PCJ1,237561.A0A1D8PCM4,237561.A0A1D8PCQ5,237561.A0A1D8PCW6,237561.A0A1D8PD17,237561.A0A1D8PDC7,237561.A0A1D8PDL6,237561.A0A1D8PDT3,237561.A0A1D8PDT4,237561.A0A1D8PDU3,237561.A0A1D8PDU9,237561.A0A1D8PDY5,237561.A0A1D8PDZ1,237561.A0A1D8PE97,237561.A0A1D8PEI6,237561.A0A1D8PEV4,237561.A0A1D8PEY9,237…
GO:0032991	Protein-containing complex	149	4.01e-05	237561.A0A1D8PCD7,237561.A0A1D8PCI6,237561.A0A1D8PCJ1,237561.A0A1D8PCQ5,237561.A0A1D8PCS7,237561.A0A1D8PCT4,237561.A0A1D8PDL6,237561.A0A1D8PDU3,237561.A0A1D8PDZ1,237561.A0A1D8PE97,237561.A0A1D8PEY9,237561.A0A1D8PF08,237561.A0A1D8PF11,237561.A0A1D8PF57,237561.A0A1D8PFE6,237561.A0A1D8PFV1,237561.A0A1D8PFX4,237561.A0A1D8PG16,237561.A0A1D8PGY8,237561.A0A1D8PH21,237561.A0A1D8PHE0,237561.A0A1D8PHH4,237…
GO:0043232	Intracellular non-membrane-bounded organelle	130	2.19e-12	237561.A0A1D8PCD7,237561.A0A1D8PCG7,237561.A0A1D8PCI6,237561.A0A1D8PCJ1,237561.A0A1D8PCQ5,237561.A0A1D8PCW6,237561.A0A1D8PDL6,237561.A0A1D8PDT3,237561.A0A1D8PDT4,237561.A0A1D8PDU3,237561.A0A1D8PDZ1,237561.A0A1D8PEV4,237561.A0A1D8PEY9,237561.A0A1D8PF08,237561.A0A1D8PF11,237561.A0A1D8PF57,237561.A0A1D8PFE6,237561.A0A1D8PFV1,237561.A0A1D8PFX4,237561.A0A1D8PG16,237561.A0A1D8PGA8,237561.A0A1D8PGY8,237…
GO:0005739	Mitochondrion	122	4.87e-14	237561.A0A1D8PCD7,237561.A0A1D8PCI9,237561.A0A1D8PCJ1,237561.A0A1D8PCM4,237561.A0A1D8PDU9,237561.A0A1D8PE97,237561.A0A1D8PEI6,237561.A0A1D8PG46,237561.A0A1D8PGA8,237561.A0A1D8PGI8,237561.A0A1D8PHE0,237561.A0A1D8PHH7,237561.A0A1D8PHR0,237561.A0A1D8PHY2,237561.A0A1D8PI00,237561.A0A1D8PI78,237561.A0A1D8PIF8,237561.A0A1D8PJ73,237561.A0A1D8PJ94,237561.A0A1D8PJB1,237561.A0A1D8PJV4,237561.A0A1D8PK65,237…
GO:1990904	Ribonucleoprotein complex	111	1.74e-33	237561.A0A1D8PCD7,237561.A0A1D8PCI6,237561.A0A1D8PCJ1,237561.A0A1D8PCQ5,237561.A0A1D8PDL6,237561.A0A1D8PDU3,237561.A0A1D8PDZ1,237561.A0A1D8PEY9,237561.A0A1D8PF08,237561.A0A1D8PF11,237561.A0A1D8PF57,237561.A0A1D8PFV1,237561.A0A1D8PFX4,237561.A0A1D8PG16,237561.A0A1D8PGY8,237561.A0A1D8PH21,237561.A0A1D8PHE0,237561.A0A1D8PHH4,237561.A0A1D8PHW1,237561.A0A1D8PHY2,237561.A0A1D8PI15,237561.A0A1D8PJB1,237…
GO:0005840	Ribosome	103	1.63e-53	237561.A0A1D8PCD7,237561.A0A1D8PCG7,237561.A0A1D8PCI6,237561.A0A1D8PCJ1,237561.A0A1D8PCQ5,237561.A0A1D8PCW6,237561.A0A1D8PDL6,237561.A0A1D8PDT3,237561.A0A1D8PDT4,237561.A0A1D8PDU3,237561.A0A1D8PDZ1,237561.A0A1D8PEV4,237561.A0A1D8PEY9,237561.A0A1D8PF08,237561.A0A1D8PF11,237561.A0A1D8PF57,237561.A0A1D8PFV1,237561.A0A1D8PG16,237561.A0A1D8PGY8,237561.A0A1D8PH21,237561.A0A1D8PHE0,237561.A0A1D8PHH4,237…
GO:0044391	Ribosomal subunit	92	3.07e-49	237561.A0A1D8PCD7,237561.A0A1D8PCI6,237561.A0A1D8PCJ1,237561.A0A1D8PCQ5,237561.A0A1D8PDL6,237561.A0A1D8PDU3,237561.A0A1D8PDZ1,237561.A0A1D8PEY9,237561.A0A1D8PF08,237561.A0A1D8PF11,237561.A0A1D8PF57,237561.A0A1D8PFV1,237561.A0A1D8PG16,237561.A0A1D8PGY8,237561.A0A1D8PH21,237561.A0A1D8PHE0,237561.A0A1D8PHH4,237561.A0A1D8PHW1,237561.A0A1D8PHY2,237561.A0A1D8PI15,237561.A0A1D8PJB1,237561.A0A1D8PK22,237…
GO:0005829	Cytosol	90	2.62e-10	237561.A0A1D8PCI6,237561.A0A1D8PCN0,237561.A0A1D8PCQ5,237561.A0A1D8PCS7,237561.A0A1D8PDL6,237561.A0A1D8PDZ1,237561.A0A1D8PEY9,237561.A0A1D8PF08,237561.A0A1D8PF11,237561.A0A1D8PF57,237561.A0A1D8PFV1,237561.A0A1D8PG16,237561.A0A1D8PGY8,237561.A0A1D8PH21,237561.A0A1D8PHH4,237561.A0A1D8PHW1,237561.A0A1D8PHY2,237561.A0A1D8PI15,237561.A0A1D8PK22,237561.A0A1D8PK40,237561.A0A1D8PK43,237561.A0A1D8PK61,237…
GO:0022626	Cytosolic ribosome	59	1.06e-32	237561.A0A1D8PCI6,237561.A0A1D8PCQ5,237561.A0A1D8PDL6,237561.A0A1D8PDZ1,237561.A0A1D8PEY9,237561.A0A1D8PF08,237561.A0A1D8PF11,237561.A0A1D8PF57,237561.A0A1D8PFV1,237561.A0A1D8PG16,237561.A0A1D8PGY8,237561.A0A1D8PH21,237561.A0A1D8PHH4,237561.A0A1D8PHW1,237561.A0A1D8PHY2,237561.A0A1D8PI15,237561.A0A1D8PK22,237561.A0A1D8PK40,237561.A0A1D8PK43,237561.A0A1D8PK61,237561.A0A1D8PM41,237561.A0A1D8PM75,237…
GO:0005759	Mitochondrial matrix	56	2.31e-16	237561.A0A1D8PCD7,237561.A0A1D8PCI9,237561.A0A1D8PCJ1,237561.A0A1D8PEI6,237561.A0A1D8PG46,237561.A0A1D8PGA8,237561.A0A1D8PHE0,237561.A0A1D8PHH7,237561.A0A1D8PHY2,237561.A0A1D8PJB1,237561.A0A1D8PKF3,237561.A0A1D8PLB7,237561.A0A1D8PMT8,237561.A0A1D8PMU5,237561.A0A1D8PMX3,237561.A0A1D8PNH4,237561.A0A1D8PNP0,237561.A0A1D8PP08,237561.A0A1D8PPG7,237561.A0A1D8PPR6,237561.A0A1D8PQR2,237561.A0A1D8PRP9,237…
GO:0015934	Large ribosomal subunit	55	4.35e-29	237561.A0A1D8PCD7,237561.A0A1D8PCJ1,237561.A0A1D8PCQ5,237561.A0A1D8PDL6,237561.A0A1D8PDZ1,237561.A0A1D8PF08,237561.A0A1D8PF11,237561.A0A1D8PF57,237561.A0A1D8PFV1,237561.A0A1D8PG16,237561.A0A1D8PH21,237561.A0A1D8PHH4,237561.A0A1D8PHW1,237561.A0A1D8PHY2,237561.A0A1D8PK40,237561.A0A1D8PK43,237561.A0A1D8PKF3,237561.A0A1D8PM41,237561.A0A1D8PM75,237561.A0A1D8PMT8,237561.A0A1D8PMU5,237561.A0A1D8PMX3,237…
GO:0098798	Mitochondrial protein complex	43	1.8e-10	237561.A0A1D8PCD7,237561.A0A1D8PCJ1,237561.A0A1D8PHE0,237561.A0A1D8PHY2,237561.A0A1D8PI78,237561.A0A1D8PJB1,237561.A0A1D8PKF3,237561.A0A1D8PLH1,237561.A0A1D8PLP3,237561.A0A1D8PMT8,237561.A0A1D8PMU5,237561.A0A1D8PMX3,237561.A0A1D8PNP0,237561.A0A1D8PPR6,237561.A0A1D8PQR2,237561.A0A1D8PRP9,237561.A0A1D8PSW9,237561.A0A1D8PTL2,237561.A0A1D8PUC5,237561.O94150,237561.Q59QC1,237561.Q59QT4,237561.Q59RQ4,2…
GO:0015935	Small ribosomal subunit	37	4.86e-18	237561.A0A1D8PCI6,237561.A0A1D8PDU3,237561.A0A1D8PEY9,237561.A0A1D8PGY8,237561.A0A1D8PHE0,237561.A0A1D8PI15,237561.A0A1D8PJB1,237561.A0A1D8PK22,237561.A0A1D8PK61,237561.A0A1D8PN83,237561.A0A1D8PNP0,237561.A0A1D8PNQ6,237561.A0A1D8PPE0,237561.A0A1D8PPR6,237561.A0A1D8PQN0,237561.A0A1D8PQQ5,237561.A0A1D8PQR2,237561.A0A1D8PSV5,237561.A0A1D8PTI7,237561.A0A1D8PTL2,237561.O42817,237561.O94150,237561.P0CU…
GO:0005761	Mitochondrial ribosome	33	1.12e-13	237561.A0A1D8PCD7,237561.A0A1D8PCJ1,237561.A0A1D8PHE0,237561.A0A1D8PHY2,237561.A0A1D8PJB1,237561.A0A1D8PKF3,237561.A0A1D8PMT8,237561.A0A1D8PMU5,237561.A0A1D8PMX3,237561.A0A1D8PNP0,237561.A0A1D8PPR6,237561.A0A1D8PQR2,237561.A0A1D8PRP9,237561.A0A1D8PSW9,237561.A0A1D8PTL2,237561.A0A1D8PUC5,237561.O94150,237561.Q59QC1,237561.Q59QT4,237561.Q59RQ4,237561.Q59X93,237561.Q59Z25,237561.Q5A2K4,237561.Q5A3J1…
GO:0022625	Cytosolic large ribosomal subunit	32	5.65e-18	237561.A0A1D8PCQ5,237561.A0A1D8PDL6,237561.A0A1D8PDZ1,237561.A0A1D8PF08,237561.A0A1D8PF11,237561.A0A1D8PF57,237561.A0A1D8PFV1,237561.A0A1D8PG16,237561.A0A1D8PH21,237561.A0A1D8PHH4,237561.A0A1D8PHW1,237561.A0A1D8PHY2,237561.A0A1D8PK40,237561.A0A1D8PK43,237561.A0A1D8PM41,237561.A0A1D8PM75,237561.A0A1D8PP14,237561.A0A1D8PPN6,237561.A0A1D8PPT5,237561.A0A1D8PQS0,237561.A0A1D8PRG5,237561.A0A1D8PSC5,237…
GO:0022627	Cytosolic small ribosomal subunit	27	6.19e-15	237561.A0A1D8PCI6,237561.A0A1D8PEY9,237561.A0A1D8PGY8,237561.A0A1D8PI15,237561.A0A1D8PK22,237561.A0A1D8PK61,237561.A0A1D8PN83,237561.A0A1D8PNQ6,237561.A0A1D8PPE0,237561.A0A1D8PQN0,237561.A0A1D8PQQ5,237561.A0A1D8PSV5,237561.A0A1D8PTI7,237561.O42817,237561.P0CU35,237561.P83774,237561.Q59T44,237561.Q5A109,237561.Q5A389,237561.Q5A5Q8,237561.Q5A7K0,237561.Q5A900,237561.Q5ADQ6,237561.Q5AG43,237561.Q5AJ…
GO:0005762	Mitochondrial large ribosomal subunit	23	9.18e-11	237561.A0A1D8PCD7,237561.A0A1D8PCJ1,237561.A0A1D8PHY2,237561.A0A1D8PKF3,237561.A0A1D8PMT8,237561.A0A1D8PMU5,237561.A0A1D8PMX3,237561.A0A1D8PRP9,237561.A0A1D8PSW9,237561.A0A1D8PUC5,237561.Q59QC1,237561.Q59QT4,237561.Q59RQ4,237561.Q59X93,237561.Q59Z25,237561.Q5A3J1,237561.Q5A693,237561.Q5A6K5,237561.Q5A6S0,237561.Q5A7P6,237561.Q5AHD3,237561.Q5AHG8,237561.Q5ALU1
GO:0005763	Mitochondrial small ribosomal subunit	9	0.0084	237561.A0A1D8PHE0,237561.A0A1D8PJB1,237561.A0A1D8PNP0,237561.A0A1D8PPR6,237561.A0A1D8PQR2,237561.A0A1D8PTL2,237561.O94150,237561.Q5A6Q6,237561.Q5AJZ7
GO:0005844	Polysome	7	0.0322	237561.A0A1D8PPQ1,237561.A0A1D8PRA6,237561.Q59TU0,237561.Q59YJ9,237561.Q5A678,237561.Q5AF98,237561.Q5AMT7
