# Supplementary material for: A chemically induced attenuated strain of Candida albicans generates robust protective immune responses and prevents systemic candidiasis development
Source: eLife. 2024 May 24;13:RP93760. doi: 10.7554/eLife.93760 (PMC11126311; doi:10.7554/eLife.93760)
Supplement: Supplementary file 3. — (A) STRING cluster analysis for 411 upregulated genes, (B) 388 downregulated genes, and (C) 74 downregulated genes out of 388 DEGs specific to 40 S and 60 S ribosomal subunits. [file elife-93760-supp3.xlsx]

## Sheet: Table -S3
(A) STRING analysis associated upregulated (411) gene clusters in EDTA treated C. albicans cells
#term ID	term description	observed gene count	false discovery rate	matching proteins in network (labels)
CL:7688	Mixed, incl. metal ion transport, and carboxylic acid transport	31	0.00069	CaO19.1062,PHO87,FTH1,CaO19.4805,HAP43,CaO19.4981,FTR1,FTR2,CaO19.1534,ZRT2,SMF12,CaO19.7364,FRP1,SOD1,JEN2,CSR1,ZRT1,FET34,PRA1,SEF1,GAP4,AFT2,SIT1,SSU1,ENA21,ZSF1,AGP3,BUL1,HMX1,CCC2,PUT4
CL:7689	Mixed, incl. metal ion transport, and iron ion homeostasis	24	0.00015	PHO87,FTH1,HAP43,CaO19.4981,FTR1,FTR2,CaO19.1534,ZRT2,CaO19.7364,FRP1,SOD1,CSR1,ZRT1,FET34,PRA1,SEF1,AFT2,SIT1,SSU1,ENA21,ZSF1,AGP3,HMX1,CCC2
CL:7690	Metal ion transport, and evasion of host immune response	22	0.00014	PHO87,FTH1,HAP43,CaO19.4981,FTR1,FTR2,CaO19.1534,ZRT2,FRP1,SOD1,CSR1,ZRT1,FET34,PRA1,SEF1,AFT2,SIT1,SSU1,ENA21,ZSF1,HMX1,CCC2
CL:9817	Mixed, incl. signal, and transmembrane transport	22	0.00069	CaO19.6079,A0A1D8PCT3,CaO19.4476,IFD6,CaO19.4749,CaO19.4906,CaO19.1582,CaO19.2506,CaO19.5290,CaO19.1968,CFL5,CaO19.4243,CaO19.3721,CSP1,CaO19.716,CaO19.6608,FGR46,DDR48,CaO19.2846,CaO19.2038,SCW4,CaO19.4905
CL:8441	Mixed, incl. extracellular region, and cell wall biogenesis	21	0.0334	HNM4,OP4,CaO19.1608,CaO19.4668,CDA2,CaO19.2838,YKE2,CSA1,GAM1,PHR1,SAP5,HWP1,PIR32,CSA2,IHD1,SAP6,SOD5,CaO19.2059,CHK1,CRH12,CHT4
CL:7691	Transition metal ion transport, and oxygen binding	19	3.56e-05	FTH1,HAP43,FTR1,FTR2,CaO19.1534,ZRT2,FRP1,SOD1,CSR1,ZRT1,FET34,PRA1,SEF1,AFT2,SIT1,SSU1,ZSF1,HMX1,CCC2
CL:7693	Transition metal ion transport, and regulation of immune system process	17	3.56e-05	FTH1,HAP43,FTR1,FTR2,CaO19.1534,ZRT2,FRP1,SOD1,CSR1,ZRT1,FET34,PRA1,SEF1,AFT2,SIT1,ZSF1,CCC2
CL:9516	Mostly uncharacterized, incl. 2-oxoglutarate-dependent dioxygenase activity, and glycerophosphodiester transmembrane transport	13	0.0076	CaO19.1764,CaO19.1639,CaO19.334,GIT4,CaO19.6678,CaO19.6522,CaO19.7502,CaO19.6398,BIO32,CaO19.2517,CaO19.355,FMO1,CaO19.4842
CL:7695	Iron ion transmembrane transport, and copper ion binding	12	0.00028	FTH1,HAP43,FTR1,FTR2,FRP1,SOD1,FET34,SEF1,AFT2,SIT1,ZSF1,CCC2
CL:9935	Mostly uncharacterized, incl. hormone-mediated signaling pathway, and aflatoxin biosynthesis	12	0.006	CaO19.6079,A0A1D8PCT3,CaO19.4476,IFD6,CaO19.4749,CaO19.5290,CaO19.4243,CaO19.3721,CaO19.6608,CaO19.2846,CaO19.2038,CaO19.4905
CL:9936	Mostly uncharacterized, incl. aflatoxin biosynthesis, and beta-1,2-oligomannoside metabolic process	9	0.0117	CaO19.6079,CaO19.4476,IFD6,CaO19.4749,CaO19.5290,CaO19.4243,CaO19.3721,CaO19.6608,CaO19.2846
CL:9937	Mostly uncharacterized, incl. aflatoxin biosynthesis, and cellular response to ethanol	8	0.0112	CaO19.6079,CaO19.4476,IFD6,CaO19.4749,CaO19.5290,CaO19.4243,CaO19.6608,CaO19.2846
CL:9518	Mostly uncharacterized, incl. 2-oxoglutarate-dependent dioxygenase activity, and protein phosphatase 2a binding	8	0.0334	CaO19.1639,CaO19.334,GIT4,CaO19.6678,CaO19.6398,BIO32,CaO19.355,CaO19.4842
CL:9740	Mixed, incl. ferric-chelate reductase (nadph) activity, and oligopeptide transmembrane transport	7	0.0491	CFL2,FRP2,FRE10,RBT5,PGA7,FRE9,CaO19.5952
CL:7730	Siderophore transport, and iron ion transmembrane transporter activity	6	0.006	FTH1,HAP43,FTR1,FRP1,SEF1,SIT1
CL:9939	Mixed, incl. aflatoxin biosynthesis, and drug transmembrane transport	6	0.025	CaO19.6079,CaO19.4476,CaO19.4749,CaO19.5290,CaO19.6608,CaO19.2846
(B) STRING analysis associated downregulated (388) gene clusters in EDTA treated C. albicans cells
#term ID	term description	observed gene count	false discovery rate	matching proteins in network (labels)
CL:2361	Cytosolic ribosome, and eukaryotic 43s preinitiation complex	74	4.32e-41	RPS21B,RPS42,RPS16A,RPS14B,A0A1D8PDT4,RPS23A,A0A1D8PDZ1,RPL42,RPS17B,RPL2,RPL82,RPL29,RPL4B,RPL38,RPS9B,RPL39,A0A1D8PHH4,RPL11,RPS10,CaO19.1626,RPS15,RPL19A,RPL18,RPS19A,CAM1,EFB1,A0A1D8PM41,RPL30,A0A1D8PN83,RPS25B,RPL43A,RPS13,RPL32,RPL23A,RPS28B,RPS18,RPP0,RPP1B,RPL28,RPS27,A0A1D8PTR4,RPP2A,RPS0,RPL13,RPS22B,CEF3,ASC1,RPL3,RPS8A,RPL17B,EGD1,TIF35,EFT2,RPS20,SSB1,RPS4A,SSZ1,RPL15A,RPS24,RPS21,RP…
CL:2365	Cytosolic ribosome, and eukaryotic 43s preinitiation complex	68	8.85e-39	RPS21B,RPS42,RPS16A,RPS14B,A0A1D8PDT4,RPS23A,A0A1D8PDZ1,RPL42,RPS17B,RPL2,RPL82,RPL29,RPL4B,RPL38,RPS9B,RPL39,A0A1D8PHH4,RPL11,RPS10,RPS15,RPL19A,RPL18,RPS19A,CAM1,EFB1,A0A1D8PM41,RPL30,A0A1D8PN83,RPS25B,RPL43A,RPS13,RPL32,RPL23A,RPS28B,RPS18,RPP0,RPP1B,RPL28,RPS27,A0A1D8PTR4,RPP2A,RPS0,RPL13,RPS22B,ASC1,RPL3,RPS8A,RPL17B,EGD1,TIF35,EFT2,RPS20,RPS4A,RPL15A,RPS24,RPS21,RPS12,RPL9B,RPS5,RPS7A,RPL12…
CL:2362	Cytosolic ribosome, and eukaryotic 43s preinitiation complex	69	1.96e-38	RPS21B,RPS42,RPS16A,RPS14B,A0A1D8PDT4,RPS23A,A0A1D8PDZ1,RPL42,RPS17B,RPL2,RPL82,RPL29,RPL4B,RPL38,RPS9B,RPL39,A0A1D8PHH4,RPL11,RPS10,CaO19.1626,RPS15,RPL19A,RPL18,RPS19A,CAM1,EFB1,A0A1D8PM41,RPL30,A0A1D8PN83,RPS25B,RPL43A,RPS13,RPL32,RPL23A,RPS28B,RPS18,RPP0,RPP1B,RPL28,RPS27,A0A1D8PTR4,RPP2A,RPS0,RPL13,RPS22B,ASC1,RPL3,RPS8A,RPL17B,EGD1,TIF35,EFT2,RPS20,RPS4A,RPL15A,RPS24,RPS21,RPS12,RPL9B,RPS5,…
CL:2367	Cytosolic ribosome, and eukaryotic 43s preinitiation complex	64	1.81e-36	RPS21B,RPS42,RPS16A,RPS14B,A0A1D8PDT4,RPS23A,A0A1D8PDZ1,RPL42,RPS17B,RPL2,RPL82,RPL29,RPL4B,RPL38,RPS9B,RPL39,A0A1D8PHH4,RPL11,RPS10,RPS15,RPL19A,RPL18,RPS19A,A0A1D8PM41,RPL30,A0A1D8PN83,RPS25B,RPL43A,RPS13,RPL32,RPL23A,RPS28B,RPS18,RPP0,RPP1B,RPL28,RPS27,A0A1D8PTR4,RPP2A,RPS0,RPL13,RPS22B,ASC1,RPL3,RPS8A,RPL17B,TIF35,EFT2,RPS20,RPS4A,RPL15A,RPS24,RPS21,RPS12,RPL9B,RPS5,RPS7A,RPL12,RPS26A,NIP1,RP…
CL:2942	Mitochondrial gene expression, and trna aminoacylation for protein translation	56	2.78e-20	A0A1D8PCD7,MRP20,A0A1D8PCQ5,FRS2,YBN5,CaO19.3560,VAS1,CaO19.2214,CaO19.1662,A0A1D8PKF3,CaO19.5698,CaO19.5684,THS1,A0A1D8PMX3,A0A1D8PNP0,MSM1,CaO19.688,GUS1,CaO19.7012,MRPL6,CDC60,ARC1,CaO19.2415,CaO19.2382,A0A1D8PSW9,A0A1D8PTL2,CaO19.7675,MRPS9,AIM11,SER1,MTG2,CaO19.397,CaO19.2639,DED81,MRPL8,CaO19.585,CaO19.2275,ATP23,MRPL51,CaO19.3797,CaO19.549,CaO19.498,MRPL40,MTO1,CaO19.5420,MEF2,TUF1,MSW1,RP…
CL:2368	Cytosolic large ribosomal subunit, and cytosolic small ribosomal subunit	42	1.66e-24	RPS16A,A0A1D8PDT4,RPS23A,A0A1D8PDZ1,RPL42,RPL2,RPL82,RPL29,RPL4B,RPL38,RPL39,A0A1D8PHH4,RPL11,RPS10,RPL19A,RPL18,A0A1D8PM41,RPL30,A0A1D8PN83,RPS25B,RPL43A,RPL32,RPL23A,RPP0,RPP1B,RPL28,RPP2A,RPS0,RPL13,ASC1,RPL3,RPL17B,EFT2,RPL15A,RPS24,RPS12,RPL9B,RPS7A,RPL12,RPL8B,RPP2B,RPL10A
CL:2943	Organellar ribosome, and proton-transporting atp synthase complex assembly	41	6.54e-16	A0A1D8PCD7,MRP20,A0A1D8PCQ5,CaO19.3560,CaO19.2214,CaO19.1662,A0A1D8PKF3,CaO19.5698,CaO19.5684,A0A1D8PMX3,A0A1D8PNP0,CaO19.688,CaO19.7012,MRPL6,A0A1D8PSW9,A0A1D8PTL2,CaO19.7675,MRPS9,AIM11,MTG2,CaO19.397,CaO19.2639,MRPL8,CaO19.585,CaO19.2275,ATP23,MRPL51,CaO19.3797,CaO19.549,CaO19.498,MRPL40,CaO19.5420,MEF2,TUF1,RPL5,CaO19.863,CaO19.828,CaO19.805,MRP2,MEF1,CaO19.1485
CL:2944	Organellar ribosome, and proton-transporting atp synthase complex assembly	39	1.73e-15	A0A1D8PCD7,MRP20,A0A1D8PCQ5,CaO19.3560,CaO19.2214,CaO19.1662,A0A1D8PKF3,CaO19.5698,CaO19.5684,A0A1D8PMX3,A0A1D8PNP0,CaO19.688,CaO19.7012,MRPL6,A0A1D8PSW9,A0A1D8PTL2,CaO19.7675,MRPS9,MTG2,CaO19.397,CaO19.2639,MRPL8,CaO19.585,CaO19.2275,ATP23,MRPL51,CaO19.3797,CaO19.549,CaO19.498,MRPL40,CaO19.5420,MEF2,TUF1,RPL5,CaO19.863,CaO19.828,MRP2,MEF1,CaO19.1485
CL:2370	Cytosolic large ribosomal subunit, and cytosolic small ribosomal subunit	37	2.2e-21	RPS16A,A0A1D8PDT4,RPS23A,A0A1D8PDZ1,RPL42,RPL2,RPL29,RPL4B,RPL38,RPL39,A0A1D8PHH4,RPL11,RPS10,RPL19A,RPL18,A0A1D8PM41,RPL30,A0A1D8PN83,RPS25B,RPL43A,RPL32,RPL23A,RPP0,RPL28,RPS0,RPL13,ASC1,RPL3,RPL17B,EFT2,RPL15A,RPS24,RPS12,RPL9B,RPS7A,RPL8B,RPL10A
CL:2946	Organellar ribosome, and superoxide dismutase activity	37	6.02e-15	A0A1D8PCD7,MRP20,A0A1D8PCQ5,CaO19.3560,CaO19.2214,CaO19.1662,A0A1D8PKF3,CaO19.5698,CaO19.5684,A0A1D8PMX3,A0A1D8PNP0,CaO19.688,CaO19.7012,MRPL6,A0A1D8PSW9,A0A1D8PTL2,CaO19.7675,MRPS9,MTG2,CaO19.397,CaO19.2639,MRPL8,CaO19.585,CaO19.2275,MRPL51,CaO19.3797,CaO19.549,CaO19.498,MRPL40,CaO19.5420,TUF1,RPL5,CaO19.863,CaO19.828,MRP2,MEF1,CaO19.1485
CL:2947	Organellar ribosome, and mitochondrial translational termination	36	6.81e-15	A0A1D8PCD7,MRP20,A0A1D8PCQ5,CaO19.3560,CaO19.2214,A0A1D8PKF3,CaO19.5698,CaO19.5684,A0A1D8PMX3,A0A1D8PNP0,CaO19.688,CaO19.7012,MRPL6,A0A1D8PSW9,A0A1D8PTL2,CaO19.7675,MRPS9,MTG2,CaO19.397,CaO19.2639,MRPL8,CaO19.585,CaO19.2275,MRPL51,CaO19.3797,CaO19.549,CaO19.498,MRPL40,CaO19.5420,TUF1,RPL5,CaO19.863,CaO19.828,MRP2,MEF1,CaO19.1485
CL:2372	Cytosolic large ribosomal subunit, and cytosolic small ribosomal subunit	34	3.83e-20	RPS16A,A0A1D8PDT4,RPS23A,A0A1D8PDZ1,RPL42,RPL2,RPL29,RPL4B,RPL38,RPL39,A0A1D8PHH4,RPL11,RPS10,RPL19A,RPL18,A0A1D8PM41,RPL30,A0A1D8PN83,RPS25B,RPL43A,RPL32,RPL23A,RPP0,RPS0,RPL13,ASC1,RPL3,RPL17B,RPL15A,RPS24,RPS12,RPL9B,RPS7A,RPL10A
CL:3419	Cellular amino acid biosynthetic process, and one-carbon metabolic process	34	8.5e-10	LYS2,GCV2,ARG5,6,ARO8,CHA1,ARO3,ASN1,LEU42,LYS9,HIS4,AAT22,ILV6,TRP5,GDH3,PUT1,ILV5,GCV1,ARG1,ARO2,ARO4,MET6,SAH1,ARG4,MIS11,LYS22,SER2,DFR1,LYS4,LYS12,LEU4,ECM42,ILV3,PUT2,GCV3
CL:2948	Organellar ribosome	26	6.03e-11	MRP20,CaO19.3560,CaO19.2214,CaO19.5698,CaO19.5684,A0A1D8PMX3,A0A1D8PNP0,CaO19.688,CaO19.7012,MRPL6,A0A1D8PSW9,A0A1D8PTL2,CaO19.7675,MRPS9,CaO19.397,CaO19.2639,MRPL8,CaO19.585,MRPL51,CaO19.3797,CaO19.498,MRPL40,CaO19.5420,CaO19.863,MRP2,CaO19.1485
CL:3420	Cellular amino acid biosynthetic process, and imp metabolic process	25	3.24e-08	LYS2,ARG5,6,ARO8,ARO3,ASN1,LEU42,LYS9,HIS4,AAT22,ILV6,TRP5,GDH3,PUT1,ILV5,ARG1,ARO2,ARO4,ARG4,LYS22,LYS4,LYS12,LEU4,ECM42,ILV3,PUT2
CL:3421	Cellular amino acid biosynthetic process	24	3.48e-08	LYS2,ARG5,6,ARO3,ASN1,LEU42,LYS9,HIS4,AAT22,ILV6,TRP5,GDH3,PUT1,ILV5,ARG1,ARO2,ARO4,ARG4,LYS22,LYS4,LYS12,LEU4,ECM42,ILV3,PUT2
CL:2950	Organellar ribosome	22	4.48e-09	MRP20,CaO19.3560,CaO19.2214,CaO19.5684,A0A1D8PMX3,CaO19.688,CaO19.7012,MRPL6,A0A1D8PTL2,CaO19.7675,MRPS9,CaO19.397,CaO19.2639,MRPL8,CaO19.585,MRPL51,CaO19.498,MRPL40,CaO19.5420,CaO19.863,MRP2,CaO19.1485
CL:2476	Cytosolic small ribosomal subunit, and eukaryotic 43s preinitiation complex	21	7.02e-11	RPS21B,RPS14B,RPS17B,RPS9B,RPS15,RPS19A,RPS13,RPS28B,RPS18,RPS27,A0A1D8PTR4,RPS22B,RPS8A,TIF35,RPS20,RPS4A,RPS21,RPS5,RPS26A,NIP1,RPS22A
CL:2477	Cytosolic small ribosomal subunit, and eukaryotic translation initiation factor 3 complex, eif3m	19	6.03e-11	RPS21B,RPS14B,RPS17B,RPS9B,RPS15,RPS19A,RPS13,RPS28B,RPS18,RPS27,A0A1D8PTR4,RPS22B,RPS8A,RPS20,RPS4A,RPS21,RPS5,RPS26A,RPS22A
CL:2952	Organellar ribosome	19	7.48e-08	MRP20,CaO19.3560,CaO19.2214,CaO19.5684,CaO19.688,CaO19.7012,MRPL6,A0A1D8PTL2,MRPS9,CaO19.2639,MRPL8,CaO19.585,MRPL51,CaO19.498,MRPL40,CaO19.5420,CaO19.863,MRP2,CaO19.1485
CL:2374	Cytosolic large ribosomal subunit, and cytosolic small ribosomal subunit	18	6.03e-11	A0A1D8PDT4,RPS23A,A0A1D8PDZ1,RPL42,RPL29,RPL38,RPL39,RPL11,A0A1D8PM41,A0A1D8PN83,RPS25B,RPL43A,RPP0,RPS0,RPL13,ASC1,RPS12,RPS7A
CL:2478	Cytosolic small ribosomal subunit, and eukaryotic translation initiation factor 3 complex, eif3m	16	1.76e-09	RPS21B,RPS14B,RPS17B,RPS9B,RPS15,RPS19A,RPS28B,RPS27,A0A1D8PTR4,RPS8A,RPS20,RPS4A,RPS21,RPS5,RPS26A,RPS22A
CL:3658	Carbon metabolism, and Valine, leucine and isoleucine degradation	16	0.0222	GLT1,IDP1,GDH2,LEU1,ACC1,ACO2,ERG13,FDH3,ACO1,ACH1,SDH2,SDH12,UGA11,SDH4,MLS1,ACS2
CL:3422	Aromatic amino acid family biosynthetic process, and valine, leucine and isoleucine biosynthesis	15	3.84e-05	LYS2,ARO3,LEU42,LYS9,HIS4,ILV6,TRP5,ILV5,ARO2,ARO4,LYS22,LYS4,LYS12,LEU4,ILV3
CL:3148	tRNA aminoacylation, and mitochondrial tRNA processing	15	0.00035	FRS2,YBN5,VAS1,THS1,MSM1,GUS1,CDC60,ARC1,CaO19.2415,CaO19.2382,SER1,DED81,MTO1,MSW1,HTS1
CL:3659	Mixed, incl. pyruvate metabolism, and tricarboxylic acid cycle	15	0.0289	GLT1,IDP1,GDH2,LEU1,ACC1,ACO2,ERG13,ACO1,ACH1,SDH2,SDH12,UGA11,SDH4,MLS1,ACS2
CL:4843	Protein targeting to mitochondrion, and mitochondrial intermembrane space	15	0.0114	TIM22,A0A1D8PJ94,TIM10,CaO19.6555,TIM54,SSC1,OCT1,PAM18,TIM50,TIM23,TIM44,MGE1,TIM13,TOM40,CaO19.4676
CL:4844	Protein targeting to mitochondrion, and mitochondrial intermembrane space	13	0.029	TIM22,A0A1D8PJ94,TIM10,TIM54,SSC1,PAM18,TIM50,TIM23,TIM44,MGE1,TIM13,TOM40,CaO19.4676
CL:2954	Organellar large ribosomal subunit	12	2.61e-06	CaO19.2214,CaO19.5684,CaO19.7012,MRPL6,A0A1D8PTL2,CaO19.2639,MRPL8,CaO19.585,MRPL51,CaO19.5420,CaO19.863,CaO19.1485
CL:3150	tRNA aminoacylation	12	0.002	FRS2,VAS1,THS1,MSM1,GUS1,CDC60,ARC1,CaO19.2415,CaO19.2382,DED81,MSW1,HTS1
CL:2375	Cytosolic large ribosomal subunit, and protein kinase c binding	11	1.06e-06	A0A1D8PDT4,RPS23A,A0A1D8PDZ1,RPL29,RPL39,RPL11,RPS25B,RPP0,RPL13,ASC1,RPS12
CL:2955	Organellar large ribosomal subunit	11	1.78e-06	CaO19.2214,CaO19.5684,CaO19.7012,MRPL6,A0A1D8PTL2,CaO19.2639,MRPL8,CaO19.585,CaO19.5420,CaO19.863,CaO19.1485
CL:2419	Cytosolic large ribosomal subunit, and rrna-binding	11	1.09e-05	RPL4B,A0A1D8PHH4,RPS10,RPL19A,RPL18,RPL30,RPL32,RPL23A,RPL3,RPS24,RPL9B
CL:4845	Protein targeting to mitochondrion, and misfolded protein binding	11	0.0048	TIM22,A0A1D8PJ94,TIM10,TIM54,SSC1,PAM18,TIM50,TIM23,TIM44,MGE1,TIM13
CL:3152	tRNA aminoacylation	10	0.0058	FRS2,VAS1,THS1,GUS1,CDC60,ARC1,CaO19.2415,CaO19.2382,DED81,MSW1
CL:2479	Cytosolic small ribosomal subunit, and eukaryotic translation initiation factor 3 complex, eif3m	10	7.75e-06	RPS21B,RPS9B,RPS19A,RPS28B,A0A1D8PTR4,RPS8A,RPS20,RPS21,RPS26A,RPS22A
CL:3476	Valine, leucine and isoleucine biosynthesis, and lysine biosynthetic process via aminoadipic acid	10	4.6e-05	LYS2,LEU42,LYS9,ILV6,ILV5,LYS22,LYS4,LYS12,LEU4,ILV3
CL:2437	Cytosolic large ribosomal subunit	8	4.91e-05	RPL4B,A0A1D8PHH4,RPL19A,RPL18,RPL30,RPL32,RPS24,RPL9B
CL:3063	Mixed, incl. organellar large ribosomal subunit, and mitochondrial translational termination	10	0.00063	A0A1D8PCD7,A0A1D8PCQ5,A0A1D8PKF3,MTG2,CaO19.2275,CaO19.549,TUF1,RPL5,CaO19.828,MEF1
CL:3507	Glutamine family amino acid biosynthetic process, and asparagine metabolic process	9	0.0057	ARG5,6,ASN1,AAT22,GDH3,PUT1,ARG1,ARG4,ECM42,PUT2
CL:4286	Mixed, incl. riboflavin metabolism, and vitamin b6 metabolism	9	0.0289	SNO1,THI20,PHO112,FCY24,CaO19.1427,THI13,THI6,SNZ1,THI4
CL:3662	Tricarboxylic acid cycle, and acyl-coa biosynthetic process	9	0.0362	GLT1,IDP1,GDH2,ACC1,ACO2,ACO1,SDH2,SDH12,SDH4
CL:4847	TIM23 mitochondrial import inner membrane translocase complex, and TIM22 mitochondrial import inner membrane insertion complex	8	0.0021	TIM22,TIM54,SSC1,PAM18,TIM50,TIM23,TIM44,MGE1
CL:3663	Tricarboxylic acid cycle, and glutamate catabolic process	8	0.0388	GLT1,IDP1,GDH2,ACO2,ACO1,SDH2,SDH12,SDH4
CL:2957	Circadian rhythm - plant, and organellar large ribosomal subunit	7	0.00023	CaO19.2214,CaO19.7012,MRPL6,CaO19.2639,MRPL8,CaO19.585,CaO19.863
CL:2398	Mixed, incl. acetylation, and assembly of large subunit precursor of preribosome	7	0.00038	RPL42,RPL38,A0A1D8PM41,A0A1D8PN83,RPL43A,RPS0,RPS7A
CL:3066	Organellar large ribosomal subunit, and 5s rrna binding	7	0.0022	A0A1D8PCD7,A0A1D8PCQ5,A0A1D8PKF3,CaO19.2275,CaO19.549,RPL5,CaO19.828
CL:3154	tRNA aminoacylation for protein translation	7	0.042	VAS1,THS1,GUS1,CDC60,ARC1,CaO19.2382,MSW1
CL:4851	TIM23 mitochondrial import inner membrane translocase complex	6	0.0083	SSC1,PAM18,TIM50,TIM23,TIM44,MGE1
CL:2493	Positive regulation of translational fidelity, and cytosolic small ribosomal subunit	5	0.0044	RPS9B,RPS28B,RPS8A,RPS21,RPS22A
CL:4853	TIM23 mitochondrial import inner membrane translocase complex	5	0.007	SSC1,PAM18,TIM50,TIM44,MGE1
CL:2480	Mixed, incl. eukaryotic translation initiation factor 3 complex, eif3m, and rrna transport	5	0.0109	RPS21B,RPS19A,A0A1D8PTR4,RPS20,RPS26A
CL:3494	Lysine biosynthetic process via aminoadipic acid	5	0.0109	LYS2,LYS9,LYS22,LYS4,LYS12
CL:3156	Aminoacyl-tRNA synthetase	5	0.0362	VAS1,GUS1,CDC60,ARC1,CaO19.2382
CL:3625	One-carbon metabolic process	5	0.0362	GCV2,GCV1,MIS11,DFR1,GCV3
CL:4316	Thiamine metabolism	5	0.0362	THI20,PHO112,CaO19.1427,THI6,THI4
CL:3965	Galactose catabolic process via udp-galactose, and galactose binding	4	0.0289	GAL7,GAL10,GAL102,GAL1
CL:2466	Kinase activator activity	4	0.0289	RPP1B,RPP2A,RPL12,RPP2B
CL:2503	Acetylation, and ribosomal small subunit assembly	4	0.0289	RPS14B,RPS17B,RPS15,RPS27
CL:2568	De novo cotranslational protein folding, and g-protein alpha-subunit binding	4	0.0289	SSB1,SSZ1,ZUO1,BFR1
CL:2971	Large ribosomal subunit rrna binding, and organellar large ribosomal subunit	4	0.0289	CaO19.5684,A0A1D8PTL2,CaO19.5420,CaO19.1485
CL:3052	Organellar ribosome	4	0.0289	CaO19.5698,A0A1D8PNP0,A0A1D8PSW9,CaO19.3797
CL:3068	Organellar large ribosomal subunit, and cytosolic large ribosomal subunit	4	0.0364	A0A1D8PCD7,A0A1D8PCQ5,CaO19.2275,CaO19.828
(C) STRING cluster associated cytosolic ribosome (74 genes) specific to 40s & 60s amongst downregulated genes of EDTA treated C. albicans cells
30/74 genes (40s associated)	Function
RPS21B	40S ribosomal protein S21; Required for the processing of the 20S rRNA-precursor to mature 18S rRNA in a late step of the maturation of 40S ribosomal subunits. Has a physiological role leading to 18S rRNA stability.
RPS42	40S ribosomal protein S4; Belongs to the eukaryotic ribosomal protein eS4 family
RPS16A	Ribosomal 40S subunit protein S16A; Belongs to the universal ribosomal protein uS9 family
RPS14B	Ribosomal 40S subunit protein S14B; Belongs to the universal ribosomal protein uS11 family
RPS23A	Ribosomal 40S subunit protein S23B; Belongs to the universal ribosomal protein uS12 family.
RPS17B	Ribosomal 40S subunit protein S17B
RPS9B	Ribosomal 40S subunit protein S9B
RPS10	Ribosomal 40S subunit protein S10A
RPS15	Ribosomal 40S subunit protein S15; Belongs to the universal ribosomal protein uS19 family.
RPS19A	Ribosomal 40S subunit protein S19A
A0A1D8PN83	Ribosomal 40S subunit protein S11A; Belongs to the universal ribosomal protein uS17 family.
RPS25B	40S ribosomal protein S25; Belongs to the eukaryotic ribosomal protein eS25 family
RPS13	Ribosomal 40S subunit protein S13; Belongs to the universal ribosomal protein uS15 family.
RPS28B	Ribosomal 40S subunit protein S28B
RPS18	Ribosomal 40S subunit protein S18B; Belongs to the universal ribosomal protein uS13 family
RPS27	40S ribosomal protein S27
A0A1D8PTR4	Ribosomal 40S subunit protein S29A
RPS0	40S ribosomal protein S0; Required for the assembly and/or stability of the 40S ribosomal subunit. Required for the processing of the 20S rRNA- precursor to mature 18S rRNA in a late step of the maturation of 40S ribosomal subunits; Belongs to the universal ribosomal protein uS2 family
ASC1	Guanine nucleotide-binding protein subunit beta-like protein; Located at the head of the 40S ribosomal subunit in the vicinity of the mRNA exit channel, it serves as a scaffold protein that can recruit other proteins to the ribosome. Involved in the negative regulation of translation of a specific subset of proteins (By similarity). Plays a role in morphogenesis and pathogenesis
RPS22B	40S ribosomal protein S22-B; Belongs to the universal ribosomal protein uS8 family.
RPS8A	40S ribosomal protein S8; Belongs to the eukaryotic ribosomal protein eS8 family.
RPS20	Ribosomal 40S subunit protein S20
RPS4A	40S ribosomal protein S4; Belongs to the eukaryotic ribosomal protein eS4 family.
RPS24	40S ribosomal protein S24; Belongs to the eukaryotic ribosomal protein eS24 family
RPS21	Ribosomal 40S subunit protein S2; Belongs to the universal ribosomal protein uS5 family.
RPS12	40S ribosomal protein S12; Belongs to the eukaryotic ribosomal protein eS12 family.
RPS5	Ribosomal 40S subunit protein S5; Belongs to the universal ribosomal protein uS7 family.
RPS7A	40S ribosomal protein S7; Belongs to the eukaryotic ribosomal protein eS7 family.
RPS26A	40S ribosomal protein S26; Belongs to the eukaryotic ribosomal protein eS26 family.
RPS22A	40S ribosomal protein S22-A; Belongs to the universal ribosomal protein uS8 family
31/74 genes (60s associated)	Function
A0A1D8PDT4	Ribosomal 60S subunit protein L39
A0A1D8PDZ1	Ribosomal 60S subunit protein L34B
RPL42	Ribosomal 60S subunit protein L42A; Belongs to the eukaryotic ribosomal protein eL42 family.
RPL2	Ribosomal 60S subunit protein L2A
RPL82	60S ribosomal protein L8-A
RPL29	60S ribosomal protein L29; Belongs to the eukaryotic ribosomal protein eL29 family.
RPL4B	Ribosomal 60S subunit protein L4B
RPL38	Ribosomal 60S subunit protein L38; Belongs to the eukaryotic ribosomal protein eL38 family.
RPL39	60S ribosomal protein L36; Belongs to the eukaryotic ribosomal protein eL36 family
A0A1D8PHH4	Ribosomal 60S subunit protein L33A
RPL11	Ribosomal 60S subunit protein L11B; Belongs to the universal ribosomal protein uL5 family.
RPL19A	60S ribosomal protein L19-A; Belongs to the eukaryotic ribosomal protein eL19 family.
RPL18	Ribosomal 60S subunit protein L18A
A0A1D8PM41	Ribosomal 60S subunit protein L22B
RPL30	Ribosomal 60S subunit protein L30
RPL43A	Ribosomal 60S subunit protein L43A
RPL32	Ribosomal 60S subunit protein L32
RPL23A	Ribosomal 60S subunit protein L23B; Belongs to the universal ribosomal protein uL14 family.
RPP0	60S acidic ribosomal protein P0; Component of the ribosome, a large ribonucleoprotein complex responsible for the synthesis of proteins in the cell. The small ribosomal subunit (SSU) binds messenger RNAs (mRNAs) and translates the encoded message by selecting cognate aminoacyl-transfer RNA (tRNA) molecules. The large subunit (LSU) contains the ribosomal catalytic site termed the peptidyl transfer…
RPP1B	60S acidic ribosomal protein P1-B; Belongs to the eukaryotic ribosomal protein P1/P2 family.
RPL28	Ribosomal 60S subunit protein L28; Belongs to the universal ribosomal protein uL15 family.
RPP2A	60S acidic ribosomal protein P2-A; Belongs to the eukaryotic ribosomal protein P1/P2 family.
RPL13	60S ribosomal protein L13; Belongs to the eukaryotic ribosomal protein eL13 family.
RPL3	Ribosomal 60S subunit protein L3; Belongs to the universal ribosomal protein uL3 family.
RPL17B	Ribosomal 60S subunit protein L17B; Belongs to the universal ribosomal protein uL22 family.
RPP2B	60S acidic ribosomal protein P2-B; Belongs to the eukaryotic ribosomal protein P1/P2 family.
RPL10A	60S ribosomal protein L10a; Belongs to the universal ribosomal protein uL1 family.
RPL15A	60S ribosomal protein L15-A; Belongs to the eukaryotic ribosomal protein eL15 family.
RPL9B	Ribosomal 60S subunit protein L9B
RPL12	Ribosomal 60S subunit protein L12A; Belongs to the universal ribosomal protein uL11 family.
RPL8B	Ribosomal 60S subunit protein L8B
2 genes (Initiation factor associated)	Function
TIF35	Eukaryotic translation initiation factor 3 subunit G; RNA-binding component of the eukaryotic translation initiation factor 3 (eIF-3) complex, which is involved in protein synthesis of a specialized repertoire of mRNAs and, together with other initiation factors, stimulates binding of mRNA and methionyl-tRNAi to the 40S ribosome. The eIF-3 complex specifically targets and initiates translation of…
NIP1	Eukaryotic translation initiation factor 3 subunit C; Component of the eukaryotic translation initiation factor 3 (eIF-3) complex, which is involved in protein synthesis of a specialized repertoire of mRNAs and, together with other initiation factors, stimulates binding of mRNA and methionyl-tRNAi to the 40S ribosome. The eIF-3 complex specifically targets and initiates translation of a subset of…
4 genes (Elongation factor associated)	Function
CAM1	Translation elongation factor EF1B gamma
EFB1	Translation elongation factor 1 subunit beta; Belongs to the EF-1-beta/EF-1-delta family
CEF3	Elongation factor 3; The main role of EF-3 may be to transduce nucleoside triphosphate energy into mechanical energy for translocation during translation. EF-3 stimulates EF-1-alpha-dependent binding of aminoacyl- tRNA to the ribosome
EFT2	Elongation factor 2; Catalyzes the GTP-dependent ribosomal translocation step during translation elongation. During this step, the ribosome changes from the pre-translocational (PRE) to the post-translocational (POST) state as the newly formed A-site-bound peptidyl-tRNA and P-site-bound deacylated tRNA move to the P and E sites, respectively. Catalyzes the coordinated movement of the two tRNA mol…
2 genes (Heat shock protein associated)	Function
SSB1	Hsp70 family ATPase; Belongs to the heat shock protein 70 family
SSZ1	Ssz1p; Belongs to the heat shock protein 70 family.
2 genes (Nascent polypeptide- associated complex)	Function
EGD1	Nascent polypeptide-associated complex subunit beta; Component of the nascent polypeptide-associated complex (NAC), a dynamic component of the ribosomal exit tunnel, protecting the emerging polypeptides from interaction with other cytoplasmic proteins to ensure appropriate nascent protein targeting.
EGD2	Nascent polypeptide-associated complex subunit alpha; Component of the nascent polypeptide-associated complex (NAC), a dynamic component of the ribosomal exit tunnel, protecting the emerging polypeptides from interaction with other cytoplasmic proteins to ensure appropriate nascent protein targeting.
3 genes (Others)	Function
CaO19.1626	Deoxyhypusine synthase; catalyzes the transfer of the aminobutyl moiety from the polyamine spermidine to form an intermediate, deoxyhypusine [Nε-(4-aminobutyl)lysine] residue
ZUO1	Zuotin
BFR1	Component of polyribosome associated mRNP complexes in yeast
