# Supplementary material for: A chemically induced attenuated strain of Candida albicans generates robust protective immune responses and prevents systemic candidiasis development
Source: eLife. 2024 May 24;13:RP93760. doi: 10.7554/eLife.93760 (PMC11126311; doi:10.7554/eLife.93760)
Supplement: Supplementary file 4. [file elife-93760-supp4.xlsx]

## Sheet: Pathogenesis 33 DEGs
Pathgenesis (33 DEGs)
GO:0009405 (Term ID)	Fold change	FDR p-value	Function	Remarks	References
PRA1	1829.35	1.38328e-282	Zinc sequester; Leukocytes movement mediator; pH regulated antigen	Fungal innate immunity master regulator	Sentandreu et al. (1998), Ramón and Fonzi (2003),Urban et al. (2003), Cheng et al. (2006), Thomas et al. (2006), Soloviev et al. (2007), Luo et al. (2009), Losse et al. (2011), Citiulo et al. (2012)
CFL2	94.2481	1.58887e-282	Ferric reductase; Virulence; Oxidative stress responder	Iron metabolism	Lan et al. (2004), Murad et al. (2001), Karababa et al. (2004), Sigle et al. (2005), Liu et al. (2005), Baek et al. (2008), Chen et al. (2011)
CSA2	26.6647	0.000886698	Hyphal inducer; Heme utilization protein; Biofilm inducer	Iron homeostasis	Bensen et al. (2004), Hromatka et al. (2005), Singh et al. (2011), Srikantha et al. (2013)
PGA13	26.3347	8.37974e-163	Cell wall integrity; Morphogenesis, Virulence	Cell wall synthesis	Gelis et al. (2012)
CSA1	22.5038	3.44859e-166	Enhance transition from yeast to mycelial form; Iron homeostasis; Biofilm inducer; Pathogenesis	Mycelial surface antigen; TUP1-regulated cell wall protein	Lamarre et al. (2000), Ramón and Fonzi et al. (2003), Sigle et al. (2005), Singh et al. (2011), Srikantha et al. (2013)
PGA31	22.0969	1.25365e-18	Cell wall integrity	Putative GPI-anchored protein	Castillo et al. (2006), Castillo et al. (2008), Sorgo et al. (2011)
ALS4	10.0218	1.46827e-110	Enhance cell surface adhesion	Adhesion protein	Hoyer et al. (1998), Green et al. (2004), de Groot et al. (2004), Cheng et al. (2005), Zhao et al. (2005)
CaO19.6484	6.01403	0.0376537	Uncharacterized	_	Uniprot
PGA7	5.62472	2.14119e-46	GPI-linked hyphal surface antigen; Induce spider biofilm	Cell surface associated protein	Rosenbach et al., 2010
SOD5	4.79103	1.50523e-08	Protects against oxidative stress; Induces by neutrophils, hyphal growth, caspofungin, osmotic/oxidative stress; Induces Oralpharyngeal candidiasis	Cu-containing superoxide dismutase	Martchenko et al. (2004), Frohner et al. (2009)
SFL2	4.36917	2.72184e-44	Involved in regulation of morphogenesis; Regulates transcription in response to carbon dioxide levels; Required for filamentous growth	Transcription factor	Spiering et al. (2010), Znaidi et al. (2013), Tao et al. (2017)
UME6	4.25022	8.54748e-05	Regulates translational efficiency and controls transition to filamentous growth	Zn(II)2Cys6 transcription factor	Zeidler et al. (2009), Banerjee et al. (2008)
PHR1	4.23461	5.08343e-44	Acts on cell-wall beta-1,3-glucan prior to beta-1,6-glucan linkage; Systemic virulence	Cell surface glycosidase	Calderon et al. (2010)
MNN14	4.15031	2.32292e-08	Role in protein glycosylation; Hap43-repressed	Alpha-1,3-mannosyltransferase activity	Bates et al., 2013;Singh et al., 2011
SSU1	4.0054	3.14019e-16	Tn mutation affects filamentous growth; Regulated by Gcn2 and Gcn4; Induced by nitric oxide; Hap43-repressed	Protein similar to S. cerevisiae Ssu1 sulfite transport protein	Hromatka et al., 2005;Uhl et al., 2003;Tournu et al., 2005;Singh et al., 2011
MDR1	3.79778	5.13705e-12	Plasma membrane MDR/MFS multidrug efflux pump; Confers resistance to cycloheximide, benztriazoles, 4-nitroquinoline-N-oxide, and sulfometuron methyl	MultiDrug Resistance	Goffeau et al. (1997), Goldway et al. (1995)
CHK1	3.52284	2.52307e-58	Involved in 2-component signaling and cell wall synthesis; Role in hyphal growth defect	C. albicans Histidine Kinase	Kruppa et al. (2003)
GIT4	3.51512	0.00609617	Encode proteins involved in the transport of glycerophosphodiester metabolites	Glycerophosphocholine transporter; S. cerevisiae (GIT1)	Bishop et al. (2013)
SAP6	3.44563	0.000251599	Expresses during hyphal growth, oral carriage, and infection	Secreted Aspartyl Proteinase	Naglik et al. (1999), Nailis et al. (2010)
PGA17	3.37779	8.95929e-09	Induces in oralpharyngeal candidiasis	Predicted Gpi-Anchored	De Groot et al. (2003), Fernandez-Arenas et al. (2007)
PGA19	3.35877	0.000427786	Induce by macrophage	Predicted Gpi-Anchored	De Groot et al. (2003), Fernandez-Arenas et al. (2007)
IHD1	2.97722	1.46124e-19	Induce during hyphal development; Oralpharyngeal candidiasis;Catalyses the isocitrate to α-ketoglutarate transformation in the TCA cycle	GPI-anchored protein	Hameed et al. (2020)
BRG1	2.64863	2.38628e-15	Regulates filamentation; Induce hypha and biofilm formation	Biofilm ReGulator; Putative GATA family transcription factor	Cleary et al. (2012), Su et al. (2018)
CRH12	2.61885	1.9545e-24	Transcript regulated by Nrg1 and Tup1; Involved in transglycosidase activity	CRH family cell wall protein	Pardini et al. (2006)
HWP1	2.59926	3.12998e-18	Act as a cell-surface adhesion; Required for biofilm formation;Induce covalent attachments between germ tubes and mammalian epithelial cells	Hyphal cell wall protein	Staab et al., 1998, Staab et al., 1999; Nobile et al., 2006
IFF11	2.5223	1.00814e-06	Secreted protein required for normal cell wall structure and for virulence	Member of the IFF family	Bates et al. (2007)
AFT2	2.51005	7.96895e-19	role in regulation of iron metabolism, oxidative stress, adhesion, hyphal growth, colony morphology, virulence	Putative Aft domain transcription factor	Liang et al. (2009), Xu et al. (2012)
SEF1	2.38788	1.00949e-21	Regulates iron uptake; Promotes virulence in mice	Zn2-Cys6 transcription factor	Nobile et al. (2005), Vandeputte et al. (2011)
TYE7	2.31534	1.0055e-15	Controls glycolysis; Required for biofilm formation	bHLH (basic helix-loop-helix) transcription factor	Askew et al. (2009), Bonhomme et al. (2011)
SAP5	2.18545	0.0103344	Induce hyphal growth; Supports biofilm formation	Biofilm-specific aspartyl protease	Staib et al. (2002), Joo et al. (2013)
HGC1	2.15367	2.02643e-05	Regulates morphogenesis and biofilm formation; Causes virulence in mice	Hypha-specific G1 cyclin-related protein	Zheng et al. (2004), Wilson and Hube (2010)
DFI1	2.15181	8.46691e-24	Cell-surface associated glycoprotein; Promotes activation of Cek1 in a matrix-dependent manner	Defective in Filamentous Invasion	Zucchi et al. (2010), Nobile et al. (2012)
TEC1	2.04252	1.57846e-11	Regulate hyphal gene; Required for Spider and RPMI biofilm formation	TEA/ATTS transcription factor	Schweizer et al. (2000), Wachtler et al. (2011)
