# Supplementary material for: A chemically induced attenuated strain of Candida albicans generates robust protective immune responses and prevents systemic candidiasis development
Source: eLife. 2024 May 24;13:RP93760. doi: 10.7554/eLife.93760 (PMC11126311; doi:10.7554/eLife.93760)
Supplement: Supplementary file 5. [file elife-93760-supp5.xlsx]

## Sheet: Downregulated 100 sig genes
List of downregulated genes in EDTA treated C. albicans cell (CAET)
Metabolic pathways
No. of DEGs	Name (44 DEGs)	Max group mean	Log₂ fold change	Fold Change	FDR p-value	Function	Function according to UniProt
1	PHO100	262.846	-6.64902	100.359	1.78685e-210	Encode inducible acid phosphatase; encode an enzyme phosphomonoesterase; Virulence	Predicted periplasmic acid phosphatase
2	PLB1	131.48	-6.232	75.1656	3.78965e-221	Virulence; Expression regulated via morphogenic transition; Phospholipase activity; Lipid metabolism	Phospholipase
3	THI4	131.603	-5.5927	48.258	2.15644e-130	Involved in thiamine biosynthesis	Thiazole biosynthetic enzyme precursor
4	THI13	381.512	-4.67011	25.4592	8.29242e-175	Regulate IL-10 and IL-12 production; Biosynthesis of thiamine precursor molecules; Pyrimidine precursor biosynthesis	Thiamine synthesis
5	GIT1	59.1785	-4.50548	22.7136	3.23111e-112	Imports phosphodiesterase into cell; functions as proton symporter	Glycerophosphoinositol transporter
6	HSP31	12.5066	-4.17763	18.0964	2.39778e-23	Involved in diauxic shift reprogramming and glyoxalase III activity	Heat shock protein/Active methylglyoxalases
7	PHO84	674.775	-4.10945	17.261	4.30711e-163	High-affinity inorganic phosphate/H+ symporter; encode protein involved in phosphate metabolism; TORC1 activity	Phosphate transporters
8	PUT1	66.9457	-3.85674	14.4875	7.5039e-99	Involved in amino acid metabolism; Elevate ATP production; Proline assimilation pathway	Proline catabolic gene
9	INO1	2051.97	-3.42544	10.7438	1.55316e-128	Encodes inositol-1-phosphate synthase for inositol for phosphotidylinositol synthesis; response to azole resistance	Inositol biosynthetic gene/Myo-inositol-1-phosphatesynthase
10	OPT1	71.5776	-3.38711	10.4622	1.83956e-90	Involved in peptide transportation; growth	Oligopeptide transporters
11	PUT2	88.5108	-3.02378	8.13295	1.98896e-99	Amino acid metabolism regulator; Stimulate ATP production; Proline catabolism to form glutamate	Proline catabolism pathway gene
12	LYS22	132.019	-2.98096	7.89509	2.77628e-95	Homocitrate synthase activity and lysine auxotrophy	Isoforms of homocitrate synthase (HCS)
13	ACO2	133.905	-2.87441	7.33302	2.21018e-91	encodes a fusion protein between aconitase and a putative mitochondrial ribosomal protein bL21 in S. pombe	Aconitate hydratase 2
14	SNZ1	165.73	-2.853	7.22502	2.98178e-78	Involved in pyridoxine (vitamin B6) synthesis in stationary phase	Snooze: stationary phase-induced gene family
15	BTA1	3.14085	-2.84829	7.20144	2.2825e-11	Encodes the betaine lipid synthase for biosynthesis of Diacylglyceryl-N,N,N-trimethylhomoserine (DGTS); Induce biofilm; Morphology switching; Chitin accumulation	Fungal PHO regulon
16	LYS4	32.935	-2.77527	6.84602	1.77724e-70	Involve amino acid metabolism	Homoaconitase
17	CAN2	26.7213	-2.59014	6.02156	3.95846e-54	Import arginine for its synthesis and catabolism via basic amino acid permease; Induce signalling of biofilm related molecules	CAN1-like amino acid permease
18	FCY24	127.546	-2.58166	5.98628	4.80688e-58	Recruit vitamin B6 transport	Putative purine-cytosine permeases
19	THI6	108.49	-2.55876	5.892	3.58419e-104	Thiamine biosynthesis
20	LEU1	63.9951	-2.53006	5.77596	5.41607e-99	Involved in amino acid metabolism; Catalyzes the second step in the leucine biosynthesis pathway	3-isopropylmalate dehydratase
21	GIS2	439.824	-2.51769	5.72666	2.59522e-83	Encodes the homologue of mammalian CNBP and fission yeast Byr3 proteins; Interact with CDC25 to mediate RAS/ cAMP signaling pathway	Nucleic acid binding protein/Cysteine-rich zinc finger motifs
22	LYS12	393.787	-2.50663	5.68293	1.2519e-72	Involved in dehydrogenation of homoisocitrate	Homoisocitrate dehydrogenase
23	CHA1	21.1088	-2.46364	5.51608	4.36052e-27	Involved in nutrient acquisition/metabolism	l-Serine/l-threonine deaminase
24	FET99	6.88494	-2.37058	5.17147	4.85608e-18	Involved in p-phenylenediamine oxidase; Iron transporter	Multicopper oxidase homologue
25	GCV2	150.508	-2.35734	5.12424	8.85078e-108	Catabolises glycine; Induction in elevated CO2	Glycine decarboxylase P subunit
26	GIT3	169.668	-2.23429	4.70532	1.43209e-52	Transport glycerophosphodiester metabolites into cells; Virulence; Rescue growth defects	GroPCho Permease
27	CYC1	26.0314	-2.1805	4.53312	7.41108e-12	Encode cytochrome c; Involved in respiratory pathway and mitochondrial electron transport chain	Electron transporter/Iron-sulfur containing genes
28	HXT5	22.7787	-2.12778	4.37044	3.87863e-30	Uptake fructose, glucose and mannose	Small molecule/Sugar transporters
29	ILV3	181.484	-2.11332	4.32686	2.72309e-49	Amino acid metabolism regulator; Involve in mitochondrial amino acid synthesis	Dihydroxy-acid dehydratase
30	OPT3	28.5127	-2.0305	4.08548	1.8761e-38	Transport of sulfur-containing compounds (GSH or GSH-linked xenobiotics)	Oligopeptide transporters
31	GAL1	122.953	-2.00567	4.01575	6.75558e-71	Used as a selectable marker; Executes metabolic functions in carbon source uptake and catabolism; Involved in enymatic steps	Galactokinase
32	GCY1	161.455	-1.99495	3.98603	4.12996e-66	Confers hypersensitivity to toxic ergosterol analog	Aldo/keto reductase
33	GAL10	87.7085	-1.93315	3.81889	1.55917e-65	Induce biofilm; Utilize the source of galactose	UDP-glucose 4-epimerase
34	GDH2	239.615	-1.9142	3.76905	8.49692e-47	Catalyzes deamination of glutamate to alpha-ketoglutarate; Spider and flow model biofilm induction	Mitochondrial NAD-dependent glutamate dehydrogenase
35	GCV1	76.2481	-1.90198	3.73725	2.09928e-39	Catabolises glycine; Induction in elevated CO2	Glycine decarboxylase P subunit
36	DFR1	7.14632	-1.80683	3.49872	3.23053e-05	Catalyses the NADPH-dependent reduction of 7,8-dihydrofolate to 5,4,7,8-tetrahydrofolate	Dihydrofolate reductase
37	GDH3	41.4017	-1.79737	3.47585	9.07648e-30	Encode NADP+-dependent glutamate dehydrogenases; Catalyzes glutamate biosynthesis through reductive amination of α-ketoglutarate	NADP-glutamate dehydrogenase
38	CTP1	24.7917	-1.78918	3.45619	2.97824e-16	Involved in transportion of citrate	Citrate transport protein
39	TPO4	20.746	-1.74461	3.35103	4.97048e-29	Induction of spider biofilm; Bcr1- associated repression in RPMI a/alpha biofilms	Putative sperimidine transporter
40	OPI3	34.3093	-1.73447	3.32756	1.89288e-15	Biosynthesis of phosphatidylcholine via an enzyme phosphatidylethanolamine N-methyltransferase; Development of azole resistance, amphotercin B	Phosphatidylethanolamine N-methyltransferase
41	EGD2	198.96	-1.71826	3.29039	2.54237e-30	GlcNAc-induced protein; Macrophage/pseudohyphal-induced	Nascent polypeptide associated complex protein alpha subunit
42	LYS2	75.567	-1.69073	3.2282	3.15144e-40	lysine biosynthesis; predicted binding sites for AMP and alpha-aminoadipate; inhibited by lys or thialysine; regulated by Gcn2 and Gcn4; Spider biofilm induced	Heterodimeric alpha-aminoadipate reductase large subunit
43	NUP	3.16672	-1.64977	3.13783	7.10193e-05	Involved in transportion of purine nucleosides and thymidine	nucleoside permease gene
44	ARO3	136.523	-1.60614	3.04436	1.66463e-45	aromatic amino acid synthesis; GCN-regulated; feedback-inhibited by phe if expressed in S. cerevisiae; decreased in stationary phase	3-deoxy-D-arabinoheptulosonate-7-phosphate synthase
	Cell-wall associated
	Name (7 DEGs)	Max group mean	Log₂ fold change	Fold Change	FDR p-value	Function	Remarks
1	HGT2	108.689	-4.51554	22.8725	1.91543e-170	Encode cell- wall associated proteins	Homologue to HGT1/ part of MIG1 (glucose repressor) target
2	PGA10	265.121	-3.29539	9.81772	2.80343e-96	Involved in Iron acquisition induced by ketaconazole and hypoxia	Covalently linked glycosylphosphatidylinositol (GPI) proteins
3	TRY6	13.7275	-3.15974	8.93671	5.07311e-24	Encodes for cell-substrate adherence; Transcriptional regulator in biofilm	Cell-wall associated protein same as Csa1/Rbt5; negative regulators of cell surface targets of adherence regulators genes
4	HSP30	11.1793	-2.67831	6.40107	8.86109e-17	Recruit ser/thr phosphoprotein phosphatase 1; Stress-protective function on plasma membrane; Protect membrane proteins	Heat shock protein
5	ECM331	27.754	-1.96378	3.90082	5.76083e-24	Localized at cell wall and plasma membrane; Involved in cell wall biogenesis; Induced by hypoxia	GPI-anchored protein
6	ACS2	327.274	-1.6313	3.09792	3.19601e-24	antigenic during human and murine infection; induced by Efg1; macrophage-induced protein	Acetyl-CoA synthetase
7	STB3	64.5904	-1.60325	3.03827	5.50968e-41	caspofungin induced; macrophage/pseudohyphal-repressed; rat catheter biofilm induced	Putative SIN3-binding protein 3 homolog
	Ribosomal
	Name (13 DEGs)	Max group mean	Log₂ fold change	Fold Change	FDR p-value	Function	Remarks
1	RPS28B	49.1469	-2.34783	5.09057	1.40419e-10	Autoregulates the decapping of its own mRNA machinery; Support growth	Ribosomal protein
2	RPS42	98.8498	-2.12026	4.34773	1.02472e-32	Enhance tolerance to fluconazole	Ribosomal protein
3	RDN18	10.9651	-2.0172	4.04798	1.9867e-13	18S ribosomal RNA; component of the small (40S) ribosomal subunit;	HouseKeeping Genes (HSK)
4	RPS12	206.868	-1.97976	3.94427	1.51774e-29	Regulates growth, pre-rRNA processing and polysome content	Acidic ribosomal protein S12; Non-essential ribosomal component of the 40S subunit
5	RPP1B	237.141	-1.85078	3.60695	2.33237e-25	Involved in regulation of translation elongation	Conserved acidic ribosomal protein
6	RPS21B	391.127	-1.84336	3.58844	1.10333e-29	Regulated by Nrg1, Tup1; Colony morphology-related gene regulation by Ssn6	Ribosomal protein S21
7	RPS13	1094.13	-1.80621	3.49723	3.88662e-35	_	Putative ribosomal protein of the small subunit
8	ASC1	1252.96	-1.75928	3.38529	3.46635e-25	Induces by GlcNAc & amino acid starvation; Required for virulence in mice	40S ribosomal subunit similar to G-beta subunit
9	RPL18	1223.6	-1.6937	3.23485	1.52941e-28	Plc1p-regulated, Tbf1-activated; repressed upon phagocytosis by murine macrophage; Hap43p-induced	Predicted ribosomal protein
10	RPL9B	581.545	-1.67498	3.19316	3.27531e-29	repressed upon phagocytosis by murine macrophages; repressed by nitric oxide; protein levels decrease in stationary phase; Hap43-induced	Ribosomal protein L9
11	RPL5	758.345	-1.63354	3.10273	2.25382e-30	repressed upon phagocytosis by murine macrophages; Hap43-induced	Ribosomal protein
12	RPP2B	409.318	-1.62478	3.08396	5.93521e-16	possibly involved in regulation of translation elongation; interacts with Rpp1A; 1 of 4 similar C. albicans proteins (Rpp1A, Rpp1B, Rpp2A, Rpp2B); macrophage/pseudohyphal-induced	Conserved acidic ribosomal protein
13	RPS27	208.528	-1.59941	3.03019	2.15647e-21	repressed upon phagocytosis by murine macrophage	Putative ribosomal protein
	Others
	Name (11 DEGs)	Max group mean	Log₂ fold change	Fold Change	FDR p-value	Function	Remarks
1	PGA45	27.849	-2.48308	5.59092	6.40747e-43	Putative GPI-anchored protein of unknown function	Predicted GPI protein
2	RBT7	6.63899	-2.07962	4.22695	1.5772e-09	Encode secreted RNase T2; Exhibits restriction fragment length polymorphism	Putative secreted RNase T2
3	PEX4	20.925	-1.99005	3.97251	1.24715e-12	Spider biofilm induction	Putative peroxisomal ubiquitin conjugating enzyme
4	RME1	193.065	-1.88662	3.69768	7.1604e-68	Development of fluconazole resistance; Spider and flow model biofilm induction	Zinc finger protein
5	THI20	114.036	-1.70995	3.27149	5.58989e-53	Spider biofilm induced	Putative trifunctional enzyme of thiamine biosynthesis
6	ASM3	24.0343	-1.69417	3.2359	1.59858e-31	Possible Kex2 substrate; transcript increased in an azole-resistant strain that overexpresses MDR1; F-12/CO2 early biofilm induced	Putative secreted acid sphingomyelin phosphodiesterase
7	BFR1	27.1225	-1.68978	3.22607	1.87417e-16	Protein involved in the maintenance of normal ploidy; stationary phase enriched protein	S. cerevisiae ortholog cofers Brefeldin A resistance
8	TUF1	413.528	-1.68897	3.22425	7.29461e-36	Encodes GTPase mitochondrial elongation factor Tu; Encodes mannoprotein-enriched pro-metastatic fraction of C. albicans; Higher expression in germ tubes	Translation elongation factor
9	GAL7	123.073	-1.68143	3.20747	7.9819e-49	downregulated by hypoxia, upregulated by ketoconazole; macrophage/pseudohyphal-repressed	Putative galactose-1-phoshphate uridyl transferase
10	SSP96	5.36001	-1.67943	3.20302	1.12259e-06	F-12/CO2 early biofilm induced	Putative flavin-containing monooxygenase
11	CYB5	18.1715	-1.66863	3.17913	1.7903e-06	induced in high iron; fluconazole-induced; shows colony morphology-related gene regulation by Ssn6; mutants are viable	Cytochrome b(5); ortholog of S. cerevisiae Cyb5
	Uncharacterized
1	Name (25 DEGs)	Max group mean	Log₂ fold change	Fold Change	FDR p-value	Function	Remarks
2	CAALFM_C400530CA	3.36669	-4.65831	25.2517	3.77714e-07	Uncharacterized	SurE domain-containing protein, taurine & hypotaurine pathway associated
3	CAALFM_CR08830WA	9.2376	-3.7181	13.1601	3.7788e-05	Uncharacterized	ATP synthase-coupling factor 6, mitochondrial
4	CAALFM_CR06430WA	1.55084	-2.75414	6.74651	0.00246923	Uncharacterized	Mediator of RNA polymerase II transcription subunit 7,
5	CAALFM_CR09350CA	87.0674	-2.62985	6.1896	1.40099e-55	Uncharacterized	TENA_THI-4 domain-containing protein, thiamine associated protein
6	CAALFM_C112940CA	2.78865	-2.59964	6.06134	0.0378463	Uncharacterized	Rod shape-determining protein MreC, hexose associated protein
7	CAALFM_C404230WA	150.627	-2.47598	5.56346	2.28386e-82	Uncharacterized	MFS domain-containing protein, thiamine associated protein
8	CAALFM_C106870CA	4.46042	-2.32774	5.0202	0.0171805	Uncharacterized	Thyroglobulin type-1 domain-containing protein
9	CAALFM_C306240CA (MRPL39)	6.1696	-2.31335	4.97037	0.00257923	Uncharacterized	mitochondrial ribosomal protein
10	CAALFM_C500130CA (YML34)	10.3011	-2.25909	4.78688	5.51407e-07	Uncharacterized	mitochondrial ribosomal protein
11	CAALFM_C204770WA	1.6468	-2.18837	4.55791	0.00106693	Uncharacterized	plus3 domain containing protein
12	CAALFM_C103620CA	15.7923	-2.05718	4.16171	4.50987e-09	Uncharacterized	putative ribosomal family protein
13	CAALFM_C501540WA (RPS11A)	62.4265	-1.96709	3.9098	3.0519e-17	Uncharacterized	40S ribosomal protein S11A
14	CAALFM_C503290CA (MRP10)	27.0481	-1.96627	3.90757	1.74642e-10	Uncharacterized	37S ribosomal protein mrp10, mitochondrial
15	CAALFM_C503480CA	69.4695	-1.95295	3.87164	1.41077e-32	Uncharacterized	Urea transporter
16	CAALFM_C208180CA	1.42827	-1.91938	3.78261	0.0013818	Uncharacterized	Ribosome biosynthesis protein
17	CAALFM_C400990WA	1.18661	-1.87261	3.66193	0.000850431	Uncharacterized	_
18	CAALFM_C403500CA	2.2949	-1.87039	3.65632	0.0128209	Uncharacterized	_
19	CAALFM_C204110WA	2.5691	-1.78177	3.43849	1.6049e-10	Uncharacterized	RNA helicase
20	CAALFM_C703560WA	28.3659	-1.75319	3.37104	3.35062e-18	Uncharacterized	Virulence factor CaO19.6688
21	CAALFM_C108770WA	46.6674	-1.69756	3.24352	1.51784e-29	Uncharacterized	Ornithine cyclodeaminase
22	CAALFM_CR03110WA (MSE1)	14.1383	-1.66548	3.17218	6.38954e-14	Uncharacterized	glutamate-tRNA ligase
23	CAALFM_CR03470WA	101.521	-1.66092	3.16218	2.39698e-48	Uncharacterized	_
24	CAALFM_CR08480CA (RPS29A)	32.8446	-1.65208	3.14285	2.18259e-06	Uncharacterized	40S ribosomal protein S29A
25	CAALFM_CR02380CA	6.46968	-1.62947	3.094	0.000634778	Uncharacterized	ER membrane protein complex subunit 5
26	CAALFM_C400230WA	19.9036	-1.60682	3.04579	8.36614e-08	Uncharacterized	_
