# Supplementary material for: A chemically induced attenuated strain of Candida albicans generates robust protective immune responses and prevents systemic candidiasis development
Source: eLife. 2024 May 24;13:RP93760. doi: 10.7554/eLife.93760 (PMC11126311; doi:10.7554/eLife.93760)
Supplement: Supplementary file 6. [file elife-93760-supp6.xlsx]

## Sheet: Sheet1
Targets	Sequence (5’-3’)	Cyclic conditions	Amplicon size (bp)
GAPDH	(Fp) GACCGTTGACGGTCCATCC	D at 95°C for 15″	161
	(Rp) CATCGGTGGTTGGGACTC	A at 52°C for 30″ 30cycles
		E at 72°C for 30''
ZRT1	(Fp) TGATGGATGCCATTC	D at 95°C for 30″	180
	(Rp) CAAGTCACAGCGTC	A at 52°C for 30″ 35cycles
		E at 72°C for 1׳
CHT4	(Fp) ATGCCACAACCATCACC	D at 95°C for 30″	150
	(Rp) GTATCATTGGACACCAC	A at 52°C for 30″ 35cycles
		E at 72°C for 1׳
PGA13	(Fp) TCAGGTAGTGCTAGTGC	D at 95°C for 15″	172
	(Rp) CCACAGGAATTGTGGTTG	A at 47°C for 30″ 35cycles
		E at 72°C for 30''
ACO2	(Fp) CCACAGCAGTTCC	D at 95°C for 30″	199
	(Rp) GCGGCAAAGTTCTC	A at 52°C for 30″ 35cycles
		E at 72°C for 30''
PLB1	(Fp) ACACAGAAGACGAAGG	D at 95°C for 30″	184
	(Rp) CTAGGATCCCATGAAC	A at 52°C for 30″ 35cycles
		E at 72°C for 1'
THI13	(Fp) GAACCATTCACCGGT	D at 95°C for 30″	160
	(Rp) CGGCAACATAATCA	A at 42°C for 30″ 35cycles
		E at 72°C for 1'
